# Supplementary material for: Improved Metabolic Health Alters Host Metabolism in Parallel with Changes in Systemic Xeno-Metabolites of Gut Origin
Source: PLOS journal article supplement (doi:10.1371/journal.pone.0084260), 2014-01-08
Supplement: S1 (10.1371/journal.pone.0084260.s001) [file journal.pone.0084260.s001]

**SUPPLEMENTAL FIGURE 1** (Campbell et al.). Schematic of screening and recruitment of sedentary, obese, insulin-resistant women for the weight loss and fitness intervention study.

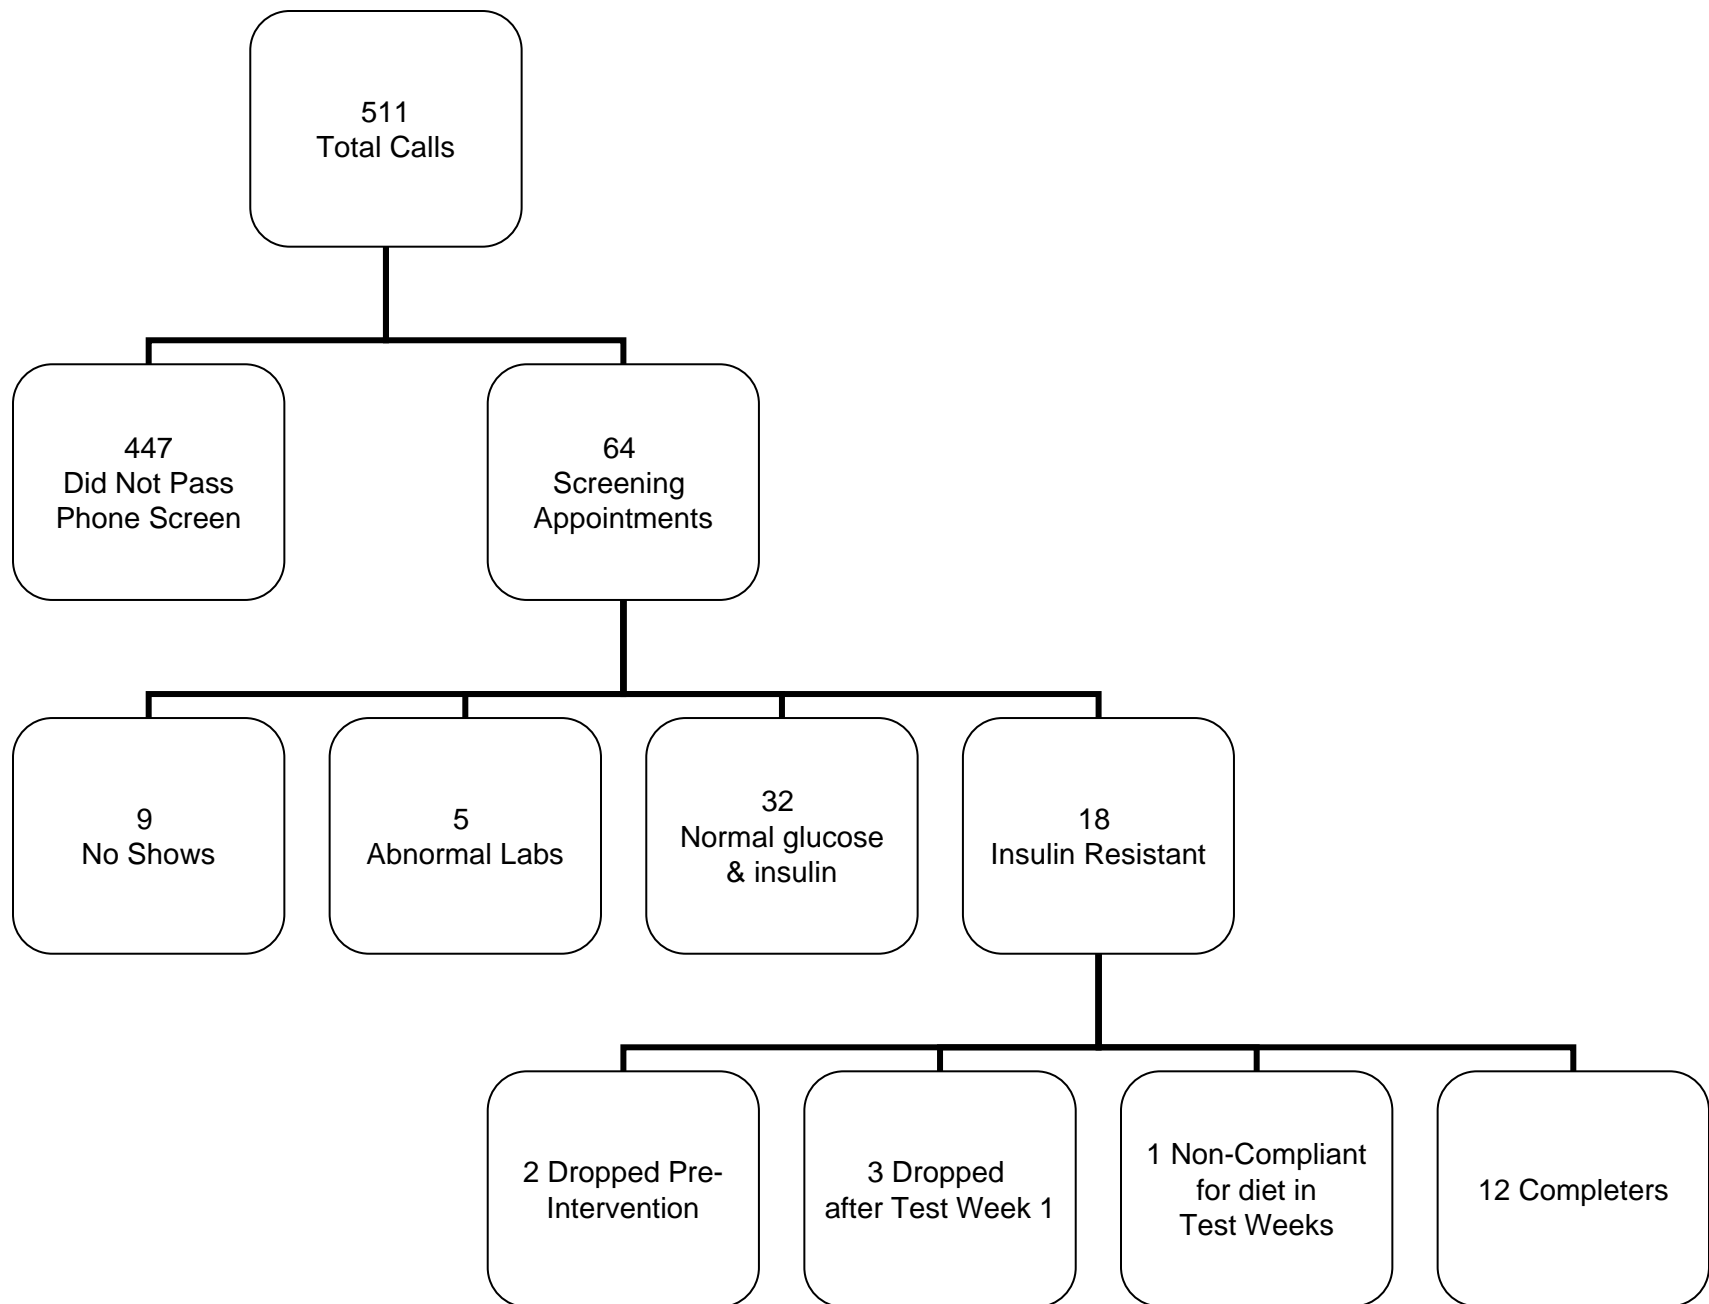

SUPPLEMENTAL FIGURE 1
