# Supplementary material for: Improved Metabolic Health Alters Host Metabolism in Parallel with Changes in Systemic Xeno-Metabolites of Gut Origin
Source: PLoS One. 2014 Jan 8;9(1):e84260. doi: 10.1371/journal.pone.0084260 (PMC3885560; doi:10.1371/journal.pone.0084260)
Supplement: Table S1 — Pre- vs. post-intervention overnight-fasting plasma metabolite simple comparisons, ranked by magnitude of change. (XLS) [file pone.0084260.s002.xls]

## Sheet: Supplemental Table 1 (ranked)
SUPPLEMENTAL TABLE 1 ("Pre" vs. "Post" Fasting Metabolite Simple Comparisons, ranked by magnitude of change)
Simple comparisons using t-tests: overnight-fasted plasma metabolite concentrations (quantifier peak ion heights)
Pre- vs. Post- weight loss and fitness intervention, obese, hyperinsulinemic sedentary women																																											pvalue <0.05
PVALUES AND FOLD-PCT DIFFERENCES IN COLUMNS TO FAR RIGHT							PRE:																			POST:																red numbers	pvalue >0.05<0.1
						subject id	2009-0130	2009-0131_b1	2010-0017_b1	2010-0018_b1	2010-0039_b1	2010-0077_b1	2010-0089_b1	2010-0107_b1	2010-0116_b1	2010-0131_b1	2010-0142_b1	2010-0150_b1	2010-0152_b1	2011-0001_b1	2011-0003_b1					2009-0130_b1	2010-0018_b1	2010-0077_b1	2010-0089_b1	2010-0107_b1	2010-0116_b1	2010-0131_b1	2010-0142_b1	2010-0150_b1	2010-0152_b1	2011-0001_b1	2011-0003_b1
BinBase name	ret.index	quant m/z	BinBase ID	mass spec	KEGG	PubChem																MEAN	SD															MEAN	SD		PERCENT OF PRE-INTERVENTION	PVAL VS. PRE-INTERVENTION, t-test
206309	222307	190	206309	86:44.0 87:47.0 88:45.0 89:32.0 90:2.0 91:17.0 92:4.0 93:10.0 94:16.0 95:18.0 98:141.0 99:81.0 100:1650.0 101:136.0 102:104.0 103:30.0 104:8.0 105:32.0 106:10.0 107:15.0 108:12.0 109:23.0 110:72.0 111:2.0 115:91.0 116:32.0 117:50.0 118:9.0 120:4.0 121:4.0			6118	6047	14274	8629	333660	7905	24738	6485	4879	24817	13536	9733	6178	11360	13632	32799.4	83465.7			5047	8345	4359	11614	11903	4835	5229	6388	7763	11965	7221	6807	7623	2808.86		0.232413	0.308164	206309
224551	501237	228	224551	85:291.0 86:256.0 88:22.0 89:452.0 91:277.0 93:47.0 94:61.0 96:7.0 97:265.0 98:267.0 100:230.0 104:57.0 105:21.0 106:116.0 107:293.0 108:386.0 109:238.0 110:1300.0 113:221.0 114:211.0 116:215.0 117:410.0 118:258.0 120:2.0 122:13.0 123:77.0 128:353.0 129:7			277	271	1523	1582	25777	3349	10010	205	241	424	304	232	321	4598	8400	3834.27	6827.2			244	537	272	463	3453	565	182	604	3271	4061	446	1686	1315.33	1438.06		0.343047	0.222375	224551
299159	588963	241	299159	85:793.0 86:1635.0 89:925.0 90:105.0 91:1481.0 92:742.0 93:93.0 94:186.0 95:2305.0 96:17515.0 97:2248.0 98:3920.0 99:1345.0 100:3756.0 101:1473.0 102:527.0 103:2190.0 104:1054.0 106:125.0 108:347.0 109:351.0 111:129.0 112:423.0 113:5266.0 114:894.0 116:70			8507	1095	2786	2769	8309	2531	10215	427	714	808	8715	1355	827	6518	5480	4070.4	3511.18			712	1392	573	3636	1600	1849	1054	434	2537	4005	643	1230	1638.75	1185.07		0.402602	0.0307812	299159
4-hydroxybenzoate	538420	223	205107	85:207.0 86:37.0 87:116.0 88:17.0 89:645.0 90:199.0 91:799.0 92:454.0 93:259.0 94:11.0 95:106.0 96:57.0 97:57.0 98:7.0 99:14.0 100:5.0 101:13.0 102:14.0 103:231.0 104:259.0 105:265.0 106:53.0 107:127.0 108:9.0 109:49.0 110:15.0 111:49.0 112:9.0 114:3.0 11	C00156	105001	157	218	5778	5539	1012	493	818	490	180	456	1707	397	401	1674	567	1325.8	1823.35			430	1386	965	287	1750	217	154	345	523	288	425	540	609.167	499.774		0.459471	0.199536	4-hydroxybenzoate
337286	249922	171	337286	85:59289.0 86:3981.0 88:1531.0 89:12.0 90:378.0 91:2482.0 92:290.0 93:267.0 94:24.0 95:1299.0 96:1110.0 97:2371.0 98:361.0 99:153.0 100:2690.0 101:365.0 102:308.0 103:122.0 104:1191.0 106:60.0 107:12705.0 108:755.0 109:818.0 110:3869.0 111:230.0 112:148.0			379	338	12584	2146	933	900	2886	111	148	327	2848	197	238	3450	2104	1972.6	3157.07			538	1419	291	2690	960	336	224	169	1413	2688	367	610	975.417	906.966		0.494483	0.301019	337286
299211	725526	183	299211	86:271.0 93:61.0 95:5.0 98:29.0 99:169.0 100:381.0 101:295.0 102:509.0 110:75.0 111:275.0 112:158.0 113:32.0 114:118.0 115:89.0 116:365.0 117:136.0 123:133.0 124:12.0 126:52.0 127:259.0 128:45.0 130:93.0 131:7.0 132:31.0 133:333.0 134:114.0 139:76.0 140:1			996	430	537	200	1418	251	991	93	172	134	1178	317	265	179	987	543.2	443.677			216	189	116	170	166	416	290	198	493	516	376	198	278.667	137.071		0.513009	0.0583224	299211
401721	263594	198	401721	86:245.0 89:329.0 90:291.0 91:270.0 92:58.0 93:607.0 98:370.0 99:87.0 100:134.0 101:607.0 102:326.0 103:43.0 104:36.0 105:49.0 107:412.0 109:9.0 110:357.0 113:1.0 116:140.0 117:92.0 118:19.0 119:43.0 120:583.0 122:27.0 123:1.0 126:87.0 127:782.0 130:255.0			1398	1675	20757	5812	4645	3197	4644	441	1747	2086	5370	1508	1435	6292	3700	4313.8	4911.14			2424	2330	2076	3016	1988	2002	1117	982	5303	2766	1994	2122	2343.33	1097.1		0.543218	0.186599	401721
235972	406729	232	235972	85:1890.0 86:4556.0 87:4270.0 88:2890.0 89:2297.0 90:1109.0 91:1164.0 92:297.0 94:391.0 95:657.0 96:794.0 98:9435.0 99:11632.0 100:13079.0 101:4298.0 102:15545.0 103:7845.0 104:1960.0 105:1375.0 106:373.0 107:1873.0 108:521.0 109:89.0 111:3217.0 112:68.0			625	177	1721	1094	1119	1001	1500	302	376	759	2022	572	540	1232	2222	1017.47	628.334			308	525	279	2196	565	447	445	111	736	389	291	398	557.5	539.912		0.547929	0.0554158	235972
alloxanoic acid	584284	331	339426	86:242.0 88:139.0 92:16.0 93:142.0 94:43.0 97:87.0 98:386.0 100:1075.0 101:54.0 102:58.0 103:258.0 105:12.0 109:34.0 111:47.0 115:125.0 116:302.0 117:17.0 119:30.0 126:3.0 128:160.0 131:311.0 132:59.0 134:398.0 136:13.0 138:5.0 141:5.0 142:34.0 143:741.0	n/a	553857	784	353	4050	1084	1510	931	1696	178	260	370	1653	417	281	1446	1470	1098.87	989.254			371	673	292	1308	606	494	258	208	1058	1311	353	448	615	396.862		0.559668	0.124382	alloxanoic acid
225427	1040697	156	225427	86:5941.0 87:611.0 88:535.0 93:167.0 94:192.0 98:81.0 99:252.0 100:2879.0 101:696.0 102:1144.0 103:343.0 105:56.0 108:82.0 109:154.0 112:593.0 113:458.0 114:419.0 115:169.0 116:592.0 117:25.0 120:41.0 121:153.0 122:88.0 126:54.0 128:559.0 129:440.0 130:88			165	1249	620	276	131	679	1322	115	1460	248	1907	645	1116	199	700	722.133	566.039			413	385	255	242	197	176	155	462	496	202	664	1234	406.75	303.729		0.563262	0.094862	225427
alpha ketoglutaric acid	507734	198	200425	85:391.0 86:157.0 87:197.0 88:83.0 89:3128.0 90:249.0 91:359.0 92:18.0 93:33.0 94:2.0 95:43.0 96:9.0 97:842.0 98:144.0 99:219.0 100:122.0 101:471.0 102:91.0 103:908.0 104:48.0 105:69.0 108:3.0 109:9.0 110:31.0 111:395.0 112:805.0 113:115.0 114:22.0 115:30	C00026	51	1559	571	883	577	570	1211	442	408	437	669	1184	651	1036	755	1109	804.133	344.375			462	364	495	399	159	299	508	1187	445	630	541	272	480.083	257.207		0.59702	0.0120562	alpha ketoglutaric acid
228147	699907	261	228147	85:5481.0 86:12568.0 87:5666.0 88:5399.0 89:79280.0 90:7883.0 91:4382.0 92:559.0 93:593.0 94:1678.0 95:2237.0 96:1986.0 97:4708.0 98:4101.0 99:8156.0 100:17639.0 101:23048.0 102:9811.0 103:108321.0 104:11929.0 105:38969.0 106:4444.0 107:2337.0 108:903.0 1			439	994	114	1049	1630	1033	1253	924	1332	937	1393	994	607	319	1189	947.133	418.382			761	595	542	432	319	424	979	525	744	581	470	859	602.583	195.805		0.636218	0.014583	228147
212022	421363	234	212022	85:58.0 86:49.0 87:76.0 88:207.0 89:186.0 90:53.0 91:102.0 94:12.0 95:13.0 98:36.0 99:7.0 100:221.0 101:82.0 102:387.0 103:1667.0 104:211.0 105:106.0 106:12.0 108:3.0 109:1.0 112:31.0 113:58.0 114:158.0 115:150.0 116:522.0 117:270.0 118:69.0 119:67.0 120:			235	518	853	339	5306	2082	266	263	576	266	483	315	275	234	1061	871.467	1320			514	656	303	2300	293	728	256	228	567	255	295	303	558.167	574.966		0.640491	0.45204	212022
parabanic acid	464937	100	223933	86:760.0 87:65.0 88:87.0 94:213.0 96:4.0 97:435.0 98:399.0 100:7361.0 101:231.0 102:286.0 109:28.0 110:248.0 114:5.0 116:43.0 118:15.0 124:580.0 129:38.0 132:97.0 134:286.0 140:653.0 143:31.0 144:8.0 146:18.0 147:520.0 153:15.0 157:6.0 158:254.0 159:29.0	C00802	67126	3439	1750	14567	4128	6006	3706	6807	842	1027	1693	7180	1842	1432	6625	6139	4478.87	3611.18			2287	2514	1305	5975	2716	1977	1297	1115	4629	6866	1663	2407	2895.92	1898.75		0.646574	0.182601	parabanic acid
hydroxylamine	255769	146	336352	86:6104.0 87:2301.0 88:1283.0 89:429.0 90:45.0 91:133.0 95:123.0 97:603.0 98:23.0 99:336.0 100:3906.0 101:603.0 102:1282.0 103:592.0 104:219.0 105:156.0 107:2.0 108:5.0 110:197.0 113:942.0 114:789.0 115:611.0 116:879.0 117:1173.0 118:588.0 119:9932.0 120:	C00192	787	3057	2287	15237	2560	2246	2255	4216	1263	1738	1596	4272	1787	1620	3837	3856	3455.13	3411.67			2261	2661	1484	2319	2355	3336	1943	1359	2885	2525	1918	2051	2258.08	561.411		0.653544	0.242175	hydroxylamine
372993	624071	284	372993	85:2147.0 86:2141.0 87:567.0 88:775.0 89:1017.0 90:434.0 91:2249.0 92:209.0 93:122.0 94:271.0 95:126.0 96:531.0 97:268.0 98:968.0 99:8157.0 100:4450.0 101:1270.0 102:505.0 103:2499.0 104:1372.0 105:114.0 106:56.0 107:205.0 108:205.0 109:237.0 110:2168.0 1			3114	934	4043	1406	878	349	1179	122	2357	741	1680	910	538	1162	448	1324.07	1085.22			1441	1532	803	199	790	1599	1268	853	545	184	940	255	867.417	511.221		0.655116	0.192376	372993
223513	808133	98	223513	85:35.0 86:155.0 87:80.0 89:1128.0 94:18.0 95:28.0 96:96.0 98:7743.0 99:753.0 100:424.0 101:231.0 102:9.0 103:6080.0 104:552.0 105:90.0 109:36.0 110:121.0 113:135.0 114:129.0 117:1687.0 118:57.0 122:2.0 123:63.0 124:63.0 125:188.0 128:135.0 129:878.0 130:			3483	5133	1599	4401	1381	3383	2881	1492	4093	3255	4221	2365	3382	1371	2404	2989.6	1197.36			2708	2349	2324	940	1063	2578	1793	2940	1443	1097	1331	3085	1970.92	782.213		0.659258	0.0176657	223513
propane-1,2,3-tricarboxylate	579508	185	272670	147:6175.0 185:1267.0 149:1088.0 148:1077.0 227:949.0 133:831.0 95:803.0 128:685.0 203:685.0 156:620.0 217:562.0 184:489.0 377:440.0 141:417.0 129:357.0 204:350.0 113:338.0 100:302.0 99:260.0 259:240.0 169:234.0 139:228.0 134:193.0 116:188.0 228:186.0 101	n/a	14925	1545	2491	2630	1482	1978	1725	2636	475	1255	856	2429	996	661	1360	3072	1706.07	803.169			919	1291	743	2168	422	1291	780	429	1769	2383	61	1260	1126.33	712.012		0.660193	0.0614521	propane-1,2,3-tricarboxylate
226842	544485	171	226842	85:115.0 86:250.0 87:101.0 88:258.0 91:47.0 93:1.0 95:10.0 96:25.0 97:268.0 98:27.0 99:156.0 100:627.0 101:836.0 102:379.0 107:476.0 108:6.0 109:22.0 111:143.0 113:39.0 114:41.0 115:2.0 116:507.0 117:2089.0 118:188.0 122:2.0 123:1.0 125:82.0 128:95.0 129:			37088	21645	73484	48886	58514	34738	68521	10120	16227	17319	70567	22251	14941	55990	67257	41169.9	23233.7			15640	31712	13484	50340	30866	19711	20061	10491	39669	57633	13767	27757	27594.2	15189.1		0.670254	0.0933854	226842
200464	387485	217	200464	85:254.0 87:295.0 88:76.0 89:28.0 90:27.0 91:141.0 93:1.0 94:11.0 95:14.0 96:38.0 97:39.0 98:50.0 99:289.0 101:219.0 102:41.0 103:85.0 104:10.0 105:3.0 106:42.0 107:78.0 109:42.0 110:801.0 111:491.0 112:129.0 113:77.0 114:116.0 115:58.0 116:104.0 117:18.0			1333	714	2855	2231	5181	1381	3709	471	331	473	3927	1014	395	4121	6276	2294.13	1936.63			581	1079	441	3966	1366	589	502	466	2682	5117	629	1102	1543.33	1552.47		0.67273	0.28594	200464
pyruvic acid	212241	174	241869	85:18315.0 86:5252.0 89:137277.0 90:12340.0 91:5391.0 92:40.0 93:1305.0 94:20.0 98:3485.0 99:46590.0 100:60978.0 101:6580.0 102:218.0 107:2897.0 108:297.0 110:6775.0 111:898.0 113:244.0 114:12290.0 115:64006.0 116:9701.0 118:2388.0 120:110.0 124:251.0 127	C00022	1060	5347	3317	2630	2014	3937	7849	2532	2317	4248	10909	5688	6444	11359	2078	4989	5043.87	3011.99			2645	2338	7504	1426	1736	3995	2609	11135	1760	1404	2872	1416	3403.33	2968.08		0.674747	0.169298	pyruvic acid
GABA	488308	174	218463	85:933.0 86:1947.0 87:44405.0 88:353.0 89:14.0 91:213.0 93:505.0 95:64.0 96:533.0 97:1597.0 98:720.0 99:350.0 100:1266.0 101:854.0 102:246.0 103:517.0 104:198.0 105:18.0 106:19.0 107:304.0 109:73.0 110:327.0 112:257.0 113:327.0 114:248.0 115:971.0 117:752	C00334	119	5107	5689	4903	4273	8441	7031	6413	2394	11091	3201	4563	2776	6277	2953	2641	5183.53	2422.1			2155	3522	3894	2109	2245	8154	5386	4653	3540	2703	2083	1848	3524.33	1843.6		0.679909	0.061317	GABA
232946	784746	278	232946	85:550.0 86:3761.0 87:342.0 90:117.0 94:83.0 95:856.0 97:426.0 98:328.0 100:2737.0 107:16.0 109:138.0 110:340.0 111:10.0 112:138.0 114:237.0 116:156.0 117:99.0 118:60.0 123:174.0 124:79.0 126:228.0 127:189.0 128:341.0 130:2063.0 131:516.0 137:94.0 138:94.			1022	659	1229	1117	1941	1689	2026	375	461	618	2059	822	607	1366	1765	1183.73	594.214			584	717	514	1058	830	683	630	407	1274	1863	566	896	835.167	404.926		0.705536	0.0955168	232946
288808	265523	232	288808	85:851.0 86:1323.0 89:8869.0 90:409.0 91:981.0 92:231.0 93:4.0 94:21.0 95:10.0 98:626.0 99:50.0 100:17626.0 101:2506.0 102:506.0 106:107.0 107:13197.0 108:646.0 109:295.0 110:4332.0 114:1114.0 116:5046.0 117:10157.0 118:1294.0 120:401.0 130:10125.0 131:24			624	502	1344	903	964	667	992	418	553	1222	650	386	362	687	624	726.533	297.767			718	728	520	533	464	617	378	522	594	404	344	389	517.583	128.752		0.712401	0.0327282	288808
225548	439768	172	225548	85:88.0 87:2.0 88:612.0 92:140.0 99:151.0 100:625.0 103:1.0 107:799.0 108:111.0 109:531.0 110:5.0 111:316.0 114:164.0 118:163.0 124:8.0 131:3.0 132:112.0 133:2.0 134:1764.0 135:306.0 136:194.0 138:74.0 142:95.0 145:40.0 147:6.0 148:1.0 152:198.0 153:30.0			418	1911	856	1140	578	2381	631	811	324	433	1076	3524	1937	899	820	1182.6	888.07			754	1600	387	487	891	681	374	1311	1413	599	1102	551	845.833	417.771		0.715232	0.238494	225548
fumaric acid	390988	245	199198	86:137.0 87:847.0 88:59.0 89:12.0 91:3.0 92:46.0 94:3.0 96:13.0 97:11.0 98:108.0 99:48.0 101:132.0 103:6.0 105:15.0 106:12.0 107:6.0 108:15.0 109:11.0 110:20.0 113:71.0 114:4.0 115:416.0 116:20.0 117:28.0 118:40.0 119:20.0 121:2.0 124:1.0 126:5.0 127:112.	C00122	444972	938	942	4130	3493	2629	960	1174	1110	671	928	1784	670	711	2567	1276	1598.87	1095.1			617	1466	1143	1237	2504	626	866	718	933	1719	641	1270	1145	556.839		0.716132	0.204216	fumaric acid
339431	747468	391	339431	85:258.0 86:124.0 88:104.0 93:75.0 95:107.0 96:143.0 98:244.0 99:39.0 100:129.0 103:92.0 105:44.0 109:97.0 111:297.0 113:43.0 115:250.0 116:20.0 117:111.0 119:26.0 129:61.0 130:255.0 131:782.0 133:2127.0 134:155.0 139:59.0 141:2.0 142:16.0 143:280.0 144:1			1729	794	2082	1374	1824	1315	1886	341	563	635	2112	892	730	1459	2550	1352.4	669.63			729	1018	473	1660	747	1280	709	491	1270	1616	696	1006	974.583	405.678		0.720632	0.098701	339431
behenic acid	919675	117	203290	85:443.0 86:84.0 87:239.0 88:45.0 89:113.0 90:5.0 91:86.0 92:19.0 93:75.0 94:6.0 95:310.0 96:111.0 97:661.0 98:211.0 99:150.0 100:28.0 101:378.0 102:25.0 103:1615.0 104:96.0 105:114.0 106:5.0 107:39.0 109:98.0 110:13.0 111:239.0 112:35.0 113:56.0 114:9.0	C08281	8215	935	1261	3993	2091	500	1509	1237	885	1269	750	1567	1405	1475	1744	1404	1468.33	804.978			1216	1188	871	683	1227	1036	499	756	1296	931	1273	1725	1058.42	332.22		0.720829	0.111442	behenic acid
226851	788409	373	226851	85:4922.0 86:1762.0 87:693.0 88:677.0 89:7422.0 90:420.0 91:289.0 93:161.0 94:391.0 95:323.0 96:595.0 97:206.0 98:1021.0 99:1121.0 100:1688.0 101:1977.0 102:623.0 103:30135.0 104:2735.0 105:1786.0 107:102.0 108:192.0 109:674.0 110:955.0 111:1758.0 112:485			1258	2094	438	2163	805	1475	1080	556	1341	1159	1886	1112	1726	527	1300	1261.33	544.746			1359	1085	1020	490	556	879	937	1613	638	668	509	1191	912.083	358.558		0.72311	0.0675809	226851
269625	253612	245	269625	85:5508.0 87:4488.0 88:39.0 89:693.0 91:557.0 92:1197.0 93:1919.0 94:579.0 95:167.0 96:359.0 97:765.0 98:2089.0 99:9164.0 100:7873.0 101:2710.0 103:1966.0 104:239.0 105:1105.0 106:56.0 107:8380.0 108:509.0 109:106.0 111:2281.0 112:557.0 113:3595.0 114:321			1284	680	1176	889	1624	1769	2133	587	511	583	2237	729	482	1365	1991	1202.67	623.67			543	816	574	1345	973	617	754	427	1386	1419	442	1140	869.667	373.089		0.723115	0.116151	269625
226922	696043	139	226922	85:1063.0 86:1308.0 87:399.0 88:787.0 89:865.0 91:63.0 94:35.0 95:307.0 97:795.0 98:3527.0 99:673.0 100:1924.0 101:1031.0 102:1112.0 103:2760.0 104:430.0 108:130.0 109:88.0 111:2132.0 112:744.0 113:1101.0 114:542.0 115:609.0 116:1261.0 117:1943.0 118:436.			12444	5201	2261	6356	12181	10670	14448	2326	3678	4089	13232	5590	3947	8189	22541	8476.87	5689.92			3069	3786	2298	9687	2510	6561	4320	2599	13670	15244	3563	6642	6162.42	4451.66		0.726969	0.259706	226922
281216	605436	144	281216	86:300.0 87:176.0 88:801.0 89:9536.0 90:728.0 91:534.0 94:275.0 95:17.0 96:3.0 97:309.0 98:13620.0 99:1973.0 100:5251.0 101:2519.0 102:2159.0 103:14686.0 104:1725.0 105:690.0 106:208.0 108:82.0 109:1.0 110:2960.0 111:175.0 112:225.0 113:354.0 114:1468.0 1			730	462	1507	1228	1910	1170	1788	616	537	740	2060	522	509	1424	1752	1130.33	577.086			572	975	604	1241	504	780	609	438	1372	1410	517	842	822	349.854		0.727219	0.116946	281216
lactic acid	219167	191	217790	85:126.0 86:889.0 87:3026.0 88:5084.0 89:1183.0 90:22.0 93:4.0 94:202.0 98:1466.0 99:374.0 100:921.0 101:2751.0 102:1904.0 103:1178.0 104:118.0 105:617.0 106:59.0 107:9.0 108:12.0 110:76.0 115:1015.0 117:53210.0 118:5574.0 119:2852.0 120:184.0 123:9.0 127	C00186	612	271929	149319	289602	207606	427232	140076	296476	143596	205930	400556	148097	190472	251591	182582	94458	226635	96380.4			337790	271214	186461	83356	141357	168055	118991	244279	118030	69628	144417	98941	165210	81644.1		0.72897	0.0909134	lactic acid
pyrophosphate	327894	110	268215	85:3151.0 86:2999.0 87:692.0 88:1804.0 89:47.0 90:205.0 91:611.0 93:12.0 95:130.0 96:227.0 97:70.0 98:484.0 99:41264.0 100:16898.0 101:3765.0 102:876.0 104:178.0 106:359.0 107:1468.0 108:315.0 109:266.0 110:19938.0 111:3489.0 112:470.0 113:923.0 114:3402.	C0013	1023	16750	3876	25507	7231	13440	4286	6250	2764	3073	4097	7076	5150	3525	13494	17567	8939.07	6821.79			3734	4771	3401	10815	5470	10646	2837	4874	7905	15593	3667	4546	6521.58	3927.41		0.72956	0.286498	pyrophosphate
gamma-tocopherol	1026222	223	202089	85:38.0 87:1.0 88:3.0 90:2.0 91:84.0 92:6.0 93:9.0 95:56.0 96:10.0 97:5.0 100:8.0 101:15.0 102:2.0 103:10.0 104:31.0 105:86.0 106:15.0 107:6.0 108:2.0 109:49.0 113:15.0 114:1.0 115:6.0 116:18.0 117:6.0 118:3.0 119:21.0 120:16.0 121:20.0 123:12.0 124:4.0 1	C02483	92729	1898	1800	2383	946	1975	4002	1697	2725	1709	1709	1957	3118	3089	1988	704	2113.33	846.346			927	726	3368	559	1864	1259	2924	1787	1985	1051	1233	819	1541.83	881.832		0.729574	0.0993581	gamma-tocopherol
223505	810335	246	223505	85:410.0 86:539.0 87:104.0 88:90.0 89:1966.0 90:67.0 91:122.0 94:67.0 95:442.0 97:23.0 98:553.0 99:201.0 100:577.0 101:245.0 102:214.0 103:7628.0 104:619.0 105:245.0 107:64.0 108:135.0 109:24.0 110:79.0 111:132.0 112:118.0 113:243.0 114:1755.0 115:281.0 1			193	564	499	411	199	352	203	168	322	261	654	210	343	313	546	349.2	154.562			329	159	302	248	269	209	180	235	299	273	157	399	254.917	72.5427		0.730002	0.0633263	223505
stigmasterol	1110434	159	199227	85:338.0 87:7.0 88:18.0 89:101.0 90:13.0 91:3177.0 92:471.0 93:2738.0 94:496.0 95:2308.0 96:514.0 97:1648.0 98:96.0 99:100.0 100:3.0 101:188.0 102:4.0 103:344.0 104:108.0 105:2670.0 106:384.0 107:1948.0 108:278.0 109:1101.0 110:147.0 111:152.0 113:25.0 11	C05442	5280794	313	22	811	357	331	240	401	152	188	172	221	269	197	313	348	289	174.415			257	223	163	240	104	258	339	163	115	143	201	331	211.417	77.5118		0.731546	0.165672	stigmasterol
salicylaldehyde	405714	193	213449	85:15.0 86:8.0 87:20.0 88:55.0 89:854.0 90:505.0 91:3506.0 92:216.0 93:20.0 96:16.0 97:18.0 98:6.0 101:75.0 102:169.0 103:52.0 105:6.0 107:11.0 108:54.0 110:46.0 112:64.0 113:7.0 114:3.0 118:108.0 119:4307.0 120:314.0 121:8.0 122:29.0 123:16.0 124:3.0 126	C06202	6998	294	483	2630	1944	575	948	839	494	599	1024	976	644	584	1163	1009	947.067	610.937			819	871	908	503	780	623	364	673	644	540	700	900	693.75	170.48		0.732525	0.17715	salicylaldehyde
425495	913088	290	425495	85:65.0 86:260.0 88:173.0 89:46.0 90:114.0 91:3.0 92:22.0 93:41.0 94:14.0 95:75.0 96:298.0 97:802.0 98:192.0 99:92.0 100:116.0 101:104.0 102:131.0 103:4364.0 104:527.0 105:175.0 107:372.0 108:123.0 109:101.0 110:2496.0 111:207.0 112:85.0 113:65.0 114:105.			471	833	1915	2110	1283	1412	2145	146	606	754	2279	810	740	980	1246	1182	664.754			504	1041	641	714	609	707	615	548	2059	852	663	1445	866.5	456.344		0.73308	0.17412	425495
239873	732710	391	239873	87:162.0 88:87.0 91:7.0 93:117.0 94:136.0 95:64.0 97:82.0 98:501.0 99:130.0 100:935.0 101:149.0 102:97.0 108:82.0 109:264.0 110:198.0 111:198.0 113:32.0 115:325.0 117:799.0 118:32.0 119:37.0 124:9.0 126:148.0 128:74.0 129:256.0 131:1207.0 132:339.0 133:23			1897	751	1519	1438	2022	1253	1892	255	663	489	2111	944	657	1631	3478	1400	830.466			669	1031	293	2004	745	1333	670	471	1350	2188	555	1049	1029.83	595.943		0.735595	0.206253	239873
402237	302264	89	402237	85:2637.0 86:1767.0 87:297.0 89:13214.0 90:1027.0 91:782.0 93:210.0 97:199.0 98:709.0 99:1262.0 100:672.0 101:97.0 103:1.0 104:5.0 105:144.0 106:1.0 110:3056.0 111:110.0 112:344.0 113:4243.0 114:2662.0 115:2018.0 116:113.0 117:317.0 120:1.0 123:22.0 126:5			4293	2619	3616	2536	3241	3807	1698	2593	3071	3536	3474	2619	4074	3116	3911	3213.6	704.911			1245	1428	2889	2218	1649	1923	2347	2971	2537	4262	2383	2751	2383.58	813.383		0.741717	0.00883404	402237
glyoxalurea	480421	202	339422	85:153.0 86:203.0 87:350.0 91:33.0 96:85.0 98:113.0 99:222.0 100:2656.0 101:283.0 102:332.0 103:536.0 105:97.0 106:199.0 108:1.0 110:1.0 115:304.0 116:279.0 117:772.0 118:115.0 119:9.0 126:72.0 131:2276.0 132:395.0 133:1596.0 134:292.0 135:144.0 136:4.0 1	n/a	4157426	767	335	2371	1365	2065	1598	2097	443	370	634	1837	456	451	1931	2137	1257.13	779.716			467	1105	576	2146	951	439	382	295	1425	2019	613	828	937.167	627.784		0.745479	0.260024	glyoxalurea
199215	756511	204	199215	89:58.0 91:41.0 92:3.0 93:1.0 100:5.0 101:54.0 103:262.0 105:1.0 114:1.0 116:15.0 117:436.0 118:17.0 119:45.0 124:4.0 126:2.0 128:3.0 129:218.0 130:30.0 131:153.0 132:15.0 133:158.0 134:14.0 138:4.0 143:5.0 145:174.0 146:3.0 147:466.0 148:18.0 149:23.0 15			242	328	2973	3072	465	333	482	289	605	301	688	663	658	933	380	827.467	911.51			330	636	429	368	754	268	234	301	599	413	1824	1269	618.75	475.877		0.747764	0.48002	199215
294988	534360	269	294988	85:139.0 86:140.0 87:37.0 88:281.0 90:142.0 91:98.0 94:50.0 96:3.0 97:518.0 98:341.0 99:381.0 100:161.0 101:60.0 102:271.0 103:108.0 104:13.0 105:494.0 108:7.0 110:63.0 111:122.0 112:46.0 114:118.0 116:14.0 117:27.0 118:134.0 119:28.0 120:2.0 121:42.0 124			1934	1089	2101	2190	3254	2001	2815	672	571	1033	2793	1194	914	2521	3556	1909.2	959.346			909	1559	793	2605	1268	1124	827	468	2286	3204	831	1441	1442.92	837.754		0.75577	0.196783	294988
5-methoxytryptamine	863982	174	200896	85:60.0 86:6421.0 87:564.0 88:251.0 89:60.0 92:64.0 95:4.0 96:2.0 97:2.0 99:16.0 100:2946.0 101:522.0 102:429.0 103:211.0 104:23.0 105:8.0 106:3.0 107:5.0 113:36.0 114:51.0 115:178.0 116:177.0 117:520.0 118:78.0 119:25.0 121:2.0 126:2.0 127:24.0 128:71.0	C05659	1833	316	315	1207	440	451	246	216	232	395	328	313	385	234	284	448	387.333	240.452			316	253	280	170	242	435	242	385	363	268	278	282	292.833	72.0654		0.756024	0.201921	5-methoxytryptamine
223521	1166398	283	223521	85:153.0 95:206.0 96:208.0 97:111.0 100:42.0 109:59.0 110:14.0 111:80.0 113:58.0 120:29.0 123:26.0 124:7.0 129:1826.0 135:169.0 142:104.0 143:7.0 155:103.0 157:9.0 162:2.0 163:39.0 165:39.0 166:82.0 176:55.0 177:123.0 179:32.0 180:19.0 183:67.0 191:134.0			1309	951	1146	801	586	719	1076	529	1131	274	1138	632	1048	962	567	857.933	295.68			402	485	514	359	448	671	1591	930	613	584	573	640	650.833	331.495		0.758606	0.0988699	223521
356954	376812	140	356954	88:35.0 90:270.0 100:69.0 101:32.0 102:38.0 106:126.0 107:416.0 108:56.0 109:28.0 110:1110.0 112:44.0 118:46.0 122:31.0 125:4.0 130:266.0 133:174.0 134:141.0 135:112.0 136:145.0 138:54.0 140:3463.0 141:153.0 143:19.0 146:31.0 147:67.0 149:79.0 150:54.0 15			913	420	2033	1347	1211	637	1099	260	445	686	1002	689	539	1566	2626	1031.53	650.842			690	860	656	1176	741	741	496	574	1124	1217	631	490	783	257.316		0.759064	0.22525	356954
212279	437899	258	212279	85:280.0 86:91.0 89:82.0 90:1.0 92:20.0 93:23.0 94:44.0 97:44.0 98:71.0 99:288.0 100:271.0 101:339.0 102:108.0 103:283.0 104:14.0 109:4.0 110:230.0 111:39.0 112:172.0 113:472.0 114:71.0 115:2825.0 116:734.0 117:928.0 118:84.0 119:34.0 121:4.0 124:112.0 12			779	364	898	768	1694	863	1384	253	270	382	1157	645	352	980	1448	815.8	455.208			312	517	350	1646	658	339	231	186	894	1644	272	394	620.25	517.596		0.760297	0.306498	212279
maleimide	244928	154	200907	86:204.0 88:37.0 90:41.0 94:99.0 95:93.0 96:456.0 97:492.0 98:130.0 99:197.0 100:701.0 101:72.0 102:37.0 103:101.0 107:270.0 109:4.0 110:799.0 111:294.0 114:124.0 123:1.0 127:459.0 128:201.0 130:615.0 131:33.0 134:819.0 136:61.0 146:43.0 154:7216.0 155:82	C07272	10935	333	2617	2596	1963	573	1066	3564	388	1979	1543	3534	1926	3650	803	2843	1958.53	1161.21			2049	2003	1402	504	661	1980	554	1215	1849	606	3466	1599	1490.67	866.626		0.761114	0.25723	maleimide
225539	798935	387	225539	85:876.0 86:298.0 88:454.0 89:4210.0 90:134.0 92:41.0 94:511.0 95:491.0 96:172.0 97:194.0 98:18165.0 99:2164.0 100:369.0 101:1894.0 102:413.0 103:21196.0 104:1528.0 105:1224.0 107:220.0 109:125.0 110:174.0 111:402.0 112:245.0 113:853.0 114:654.0 115:74.0			271	450	480	397	90	311	247	125	533	327	287	157	407	203	457	316.133	136.288			367	231	271	77	73	402	205	512	157	242	113	249	241.583	133.538		0.764182	0.166541	225539
234717	628281	214	234717	87:29.0 91:4292.0 92:566.0 93:4359.0 94:2360.0 95:138.0 96:4.0 98:608.0 103:121.0 106:83.0 107:856.0 110:192.0 114:112.0 120:4970.0 121:5020.0 122:339.0 126:3.0 130:128.0 131:64.0 134:17.0 139:198.0 140:26.0 143:176.0 146:21.0 151:25.0 156:943.0 157:136.0			7851	7807	7708	4886	2181	4393	7534	2569	9158	4500	9980	5074	6291	3276	7102	6020.67	2387.1			4161	4213	3919	3348	3040	8599	5542	3354	5883	3311	5229	4866	4622.08	1566.91		0.767703	0.0928645	234717
cerotic acid	1032431	117	199267	85:231.0 86:3.0 87:16.0 88:18.0 89:24.0 91:23.0 92:38.0 93:82.0 94:5.0 95:213.0 96:94.0 97:314.0 98:131.0 99:84.0 100:11.0 101:1.0 104:4.0 105:27.0 106:1.0 107:29.0 109:64.0 110:9.0 111:94.0 112:29.0 113:12.0 115:35.0 116:123.0 117:2647.0 118:229.0 119:12	n/a	10469	403	546	2733	1015	571	650	541	348	685	403	887	644	471	1065	641	773.533	582.307			663	1028	569	321	961	498	468	510	677	367	479	635	598	214.95		0.773076	0.332374	cerotic acid
225396	733154	202	225396	86:665.0 87:197.0 90:5.0 91:367.0 92:81.0 93:630.0 94:231.0 95:254.0 96:823.0 97:657.0 98:622.0 99:4.0 100:1075.0 101:111.0 102:216.0 103:346.0 104:16.0 105:379.0 107:1604.0 108:368.0 109:70.0 110:543.0 112:28.0 114:162.0 115:434.0 116:1045.0 117:64.0 118			4284	1620	1290	536	2460	1511	2340	2922	4258	1313	1005	2245	1436	1213	2187	2041.33	1101.7			1556	459	1236	1773	1781	3839	959	527	1580	1498	1553	2211	1581	876.788		0.774494	0.249868	225396
montanic acid	1086666	117	201821	85:142.0 86:28.0 87:1.0 88:6.0 89:42.0 90:1.0 91:12.0 92:11.0 93:10.0 94:15.0 95:126.0 96:21.0 97:148.0 98:119.0 99:62.0 100:3.0 101:13.0 102:20.0 103:7.0 105:23.0 106:13.0 107:18.0 108:9.0 109:58.0 110:5.0 111:80.0 112:24.0 113:19.0 114:1.0 115:13.0 116:	n/a	10470	327	455	2889	1027	309	494	555	393	431	469	923	319	466	1044	667	717.867	649.087			558	933	452	339	838	438	473	431	717	354	484	673	557.5	191.067		0.776607	0.417264	montanic acid
213182	455965	173	213182	85:379.0 86:780.0 87:61.0 88:218.0 89:4822.0 90:521.0 91:104.0 97:5.0 99:108.0 100:1191.0 101:860.0 102:389.0 103:6867.0 104:697.0 105:1116.0 106:39.0 107:45.0 108:16.0 110:3.0 113:14.0 114:1444.0 115:411.0 116:345.0 117:2650.0 118:305.0 119:309.0 120:10.			635	503	735	463	632	676	678	440	564	439	556	702	355	3073	820	751.4	654.981			334	536	391	796	460	749	496	419	845	690	715	604	586.25	170.94		0.78021	0.404704	213182
lignoceric acid	977850	117	199247	85:255.0 86:33.0 87:41.0 88:34.0 89:37.0 90:5.0 91:41.0 93:66.0 94:3.0 95:288.0 96:43.0 97:296.0 98:225.0 99:57.0 100:7.0 101:8.0 102:1.0 103:20.0 105:90.0 106:26.0 107:39.0 108:15.0 109:66.0 110:3.0 111:147.0 112:43.0 113:14.0 115:19.0 116:159.0 117:3640	C08320	11197	515	815	3338	1746	936	916	822	541	878	711	1143	954	1023	1485	1059	1125.47	690.228			813	1102	809	467	1793	851	597	718	909	625	833	1049	880.5	339.352		0.782342	0.272284	lignoceric acid
314770	700265	204	314770	85:107.0 86:452.0 89:2406.0 91:183.0 93:9.0 94:148.0 98:232.0 99:231.0 100:1912.0 101:452.0 102:611.0 103:2032.0 105:49.0 108:294.0 109:114.0 112:2.0 113:241.0 114:93.0 116:174.0 117:884.0 118:33.0 124:2.0 128:64.0 129:2126.0 130:259.0 131:117.0 132:627.0			21074	15509	18397	14417	18062	18632	20494	7567	13671	12280	22739	11447	11291	12530	18399	15767.3	4320.17			11301	11513	9903	10505	12717	19225	13364	8974	14407	12206	10683	13239	12336.4	2677.14		0.782407	0.0240805	314770
219021	335520	228	219021	85:79.0 86:747.0 87:481.0 88:1478.0 89:535.0 90:80.0 91:1250.0 92:199.0 93:150.0 96:33.0 97:568.0 99:59.0 100:147.0 102:341.0 103:2026.0 104:444.0 105:491.0 106:61.0 107:301.0 108:726.0 109:97.0 110:17975.0 111:666.0 112:26.0 113:79.0 114:274.0 115:714.0			1142352	575042	1647168	1423708	1776659	1185997	1596189	411727	351422	605546	1736717	671026	494396	1729093	2687769	1.20232e+06	675463			497104	917973	473585	1943318	874160	642874	577988	349379	1507163	2192896	517820	829433	943641	608654		0.78485	0.311748	219021
288810	274062	152	288810	85:119.0 86:425.0 88:672.0 90:224.0 91:243.0 92:190.0 98:54.0 99:113.0 100:5723.0 106:92.0 107:7504.0 108:889.0 109:592.0 110:762.0 111:92.0 113:13.0 114:16.0 119:318.0 122:214.0 124:11.0 126:107.0 127:752.0 130:1928.0 132:240.0 134:2164.0 136:664.0 139:3			7356	4423	18199	11198	15116	9059	12519	3303	2455	4917	12604	5744	4360	13701	21465	9761.27	5786.46			4963	7655	4054	16658	7214	4510	3560	3558	10805	18178	4369	6497	7668.42	5024.49		0.785596	0.332181	288810
340252	632906	299	340252	85:164.0 86:195.0 87:785.0 88:1549.0 93:196.0 96:243.0 98:573.0 99:279.0 100:1224.0 103:4652.0 105:71.0 106:359.0 107:93.0 110:464.0 111:393.0 112:552.0 113:813.0 116:647.0 119:678.0 120:146.0 121:65.0 123:65.0 124:6.0 125:54.0 126:96.0 132:98.0 137:154.0			2346	1625	2859	1866	3086	2296	3497	803	913	1172	3472	1324	1197	2420	2837	2114.2	917.063			1130	1517	793	2654	1157	1541	1516	802	2742	3325	1158	1597	1661	812.631		0.78564	0.192004	340252
339455	319899	156	339455	85:58.0 88:217.0 89:49.0 91:8.0 94:37.0 96:145.0 97:47.0 98:30.0 100:1141.0 101:6.0 102:93.0 103:436.0 104:62.0 106:2.0 107:526.0 111:34.0 112:87.0 113:18.0 114:7.0 115:286.0 116:128.0 117:231.0 118:148.0 121:9.0 122:1.0 125:5.0 128:58.0 129:1027.0 130:57			1391	897	3814	2203	3206	1727	3647	1165	1017	1376	2732	1075	1071	2137	3202	2044	1031.74			989	1674	1256	3203	1734	1148	797	900	2023	3293	963	1381	1613.42	848.558		0.789343	0.255584	339455
226907	716792	387	226907	85:19.0 87:164.0 88:14.0 90:133.0 93:254.0 94:85.0 95:1499.0 96:1432.0 97:265.0 98:730.0 99:242.0 100:1238.0 101:1317.0 102:447.0 103:287.0 104:75.0 106:1.0 108:68.0 110:303.0 111:226.0 112:208.0 113:415.0 114:480.0 115:259.0 116:407.0 119:34.0 122:38.0 1			578	481	1066	589	1076	878	1102	277	431	483	1096	622	524	682	1324	747.267	315.349			426	468	377	1029	288	523	365	349	922	1323	255	770	591.25	340.64		0.791217	0.229056	226907
289052	515010	186	289052	87:83.0 88:32.0 89:1241.0 96:413.0 98:1196.0 99:2552.0 100:14571.0 101:1761.0 102:1104.0 105:81.0 106:103.0 108:76.0 110:471.0 115:12330.0 116:1831.0 117:747.0 124:281.0 128:5319.0 131:334.0 134:390.0 141:30.0 142:35112.0 143:5379.0 144:1727.0 145:42.0 14			2167	750	750	319	1382	1172	2016	1229	2566	827	1407	575	691	3277	826	1330.27	832.971			435	868	1080	1608	3020	1257	845	648	963	866	536	532	1054.83	702.247		0.792949	0.369498	289052
299218	578597	185	299218	88:51.0 90:90.0 91:96.0 96:1447.0 100:685.0 101:78.0 102:274.0 104:66.0 107:79.0 108:8.0 110:184.0 112:30.0 113:100.0 114:201.0 116:434.0 126:49.0 127:2.0 128:516.0 129:196.0 130:762.0 132:111.0 139:124.0 140:80.0 141:183.0 142:562.0 143:62.0 144:128.0 14			1364	562	2630	1685	122	1725	2636	475	341	856	2429	812	661	796	3072	1344.4	959.987			490	1291	743	1971	974	82	780	429	1907	2190	704	1260	1068.42	668.057		0.794716	0.406549	299218
glutamic acid	529370	246	199604	85:432.0 86:300.0 87:125.0 88:102.0 89:103.0 90:34.0 91:11.0 92:1.0 93:25.0 94:4.0 95:24.0 96:26.0 97:10.0 98:139.0 99:153.0 100:1571.0 101:279.0 102:133.0 103:244.0 104:23.0 105:96.0 106:2.0 107:49.0 108:7.0 109:15.0 110:39.0 111:13.0 112:197.0 113:181.0	C00025	33032	9732	15932	15911	18727	23312	40587	24653	29215	38134	26312	14419	10529	30067	10394	10861	21252.3	10088.3			11508	23781	36264	15028	17522	14240	12457	20585	14205	18660	8225	10225	16891.7	7542.87		0.794815	0.22534	glutamic acid
2-phenylpropanol	317377	193	203247	85:741.0 86:118.0 87:594.0 89:1022.0 90:119.0 91:6112.0 92:951.0 97:223.0 99:58.0 101:166.0 102:341.0 103:1475.0 104:279.0 105:1256.0 106:237.0 107:98.0 108:16.0 110:6.0 111:135.0 112:1.0 113:11.0 114:4.0 115:838.0 116:61.0 117:1154.0 118:860.0 119:1356.0	n/a	447661	266	474	2836	865	1494	519	1019	987	472	424	1299	522	1018	1279	1372	989.733	644.975			863	927	982	490	676	444	396	957	750	883	1113	1003	790.333	238.698		0.798532	0.320504	2-phenylpropanol
300379	311694	231	300379	85:559.0 86:2607.0 87:390.0 88:243.0 89:988.0 90:584.0 91:544.0 92:129.0 94:639.0 96:19.0 99:1401.0 100:9928.0 101:1211.0 102:87.0 103:389.0 104:923.0 105:484.0 107:268.0 108:53.0 109:91.0 110:612.0 111:170.0 113:1797.0 114:309.0 115:755.0 116:5330.0 117:			11899	9833	12542	6660	9307	9806	20823	3346	7465	5143	18650	4987	4036	9661	14878	9935.73	5158.69			8151	5411	8290	9952	7336	12176	4331	5222	11777	8705	6325	7627	7941.92	2474.34		0.799329	0.231168	300379
199802	642012	157	199802	85:51.0 86:58.0 87:26.0 88:28.0 89:762.0 90:61.0 91:24.0 92:8.0 94:4.0 96:7.0 97:2.0 99:26.0 100:129.0 101:288.0 102:57.0 103:1019.0 104:61.0 106:10.0 107:25.0 108:5.0 110:29.0 111:14.0 112:45.0 113:32.0 114:100.0 115:72.0 116:179.0 117:988.0 118:71.0 119			6839	9885	2276	4429	15772	5658	7192	14067	9802	5547	8771	7139	7205	3029	6863	7631.6	3673.92			5032	3674	4053	4035	3737	9089	10607	8099	5053	5894	4924	9247	6120.33	2462.96		0.801973	0.233803	199802
dodecane	247379	98	221584	85:7706.0 86:1554.0 87:672.0 88:810.0 89:230.0 93:103.0 94:200.0 95:91.0 96:489.0 97:374.0 98:3532.0 99:315.0 100:1610.0 101:263.0 102:140.0 103:534.0 105:279.0 107:79.0 108:33.0 109:6.0 110:3339.0 111:97.0 112:212.0 113:1715.0 117:32.0 120:258.0 121:117.	C08374	8182	671	818	2665	862	463	698	839	590	882	769	1067	740	726	977	954	914.733	508.096			617	814	795	597	720	1033	747	642	860	644	537	799	733.75	137.45		0.802146	0.243253	dodecane
uric acid	730534	441	304993	85:1183.0 86:635.0 87:1085.0 88:76.0 89:655.0 90:45.0 92:11.0 95:24.0 97:40.0 98:89.0 99:130.0 100:2120.0 101:1153.0 106:632.0 107:268.0 109:13.0 110:360.0 111:521.0 113:595.0 115:426.0 117:1175.0 118:109.0 119:425.0 121:144.0 122:5.0 123:45.0 125:103.0 1	C00366	1175	86434	62531	62423	66400	79289	100955	115799	44837	112127	83689	102126	104205	82205	92740	102214	86531.6	20598.2			52538	58958	65446	65396	39624	78552	56827	94317	81850	73520	91397	75015	69453.3	16129.2		0.802635	0.0269666	uric acid
oxoproline	486399	156	199593	85:411.0 86:579.0 88:30.0 89:41.0 90:9.0 91:54.0 92:82.0 94:22.0 95:6.0 96:21.0 97:47.0 98:104.0 99:161.0 100:396.0 101:80.0 102:65.0 103:101.0 104:1.0 105:43.0 108:29.0 109:3.0 110:132.0 111:17.0 112:450.0 113:124.0 114:209.0 115:135.0 116:17.0 117:189.0	C01879	7405	184285	150382	125877	126479	141977	122976	224167	121637	151923	136556	160017	85995	87158	113573	140709	138247	34931.1			75885	105295	107262	108152	118555	174415	176997	71940	123311	99596	74565	100980	111413	34318		0.805894	0.0566039	oxoproline
303091	339117	190	303091	85:487.0 86:264.0 87:171.0 88:662.0 89:241.0 90:23.0 92:335.0 93:90.0 95:55.0 96:352.0 98:89.0 99:1070.0 100:1274.0 101:137.0 102:589.0 103:1238.0 104:77.0 105:2005.0 107:1476.0 108:206.0 109:558.0 110:421.0 111:75.0 112:3.0 113:377.0 114:127.0 115:144.0			4302	1890	5664	3842	5223	3558	5535	862	1036	1835	5574	2723	1476	3985	8148	3710.2	2089.59			1670	2535	1103	5777	1815	3256	1975	1584	5310	6776	1666	2595	3005.17	1891.57		0.809974	0.372557	303091
arabitol	572573	307	362135	85:3.0 87:7.0 88:35.0 89:1178.0 90:459.0 91:504.0 99:298.0 101:776.0 102:218.0 103:10443.0 104:843.0 105:291.0 110:223.0 115:4.0 116:500.0 117:4602.0 118:643.0 119:280.0 123:3.0 126:101.0 129:4694.0 130:669.0 131:1039.0 133:2048.0 134:579.0 135:279.0 137:	C01904	94154	599	564	217	223	633	391	470	460	687	348	1109	367	671	435	735	527.267	227.873			392	390	332	347	425	555	354	360	310	618	523	538	428.667	102.646		0.812998	0.177833	arabitol
2-ketoisocaproic acid	290404	89	236689	85:28779.0 87:161.0 88:1297.0 89:144175.0 90:12389.0 91:6963.0 92:417.0 94:1010.0 95:290.0 96:159.0 97:508.0 98:841.0 99:6804.0 100:6962.0 101:1013.0 102:262.0 103:2154.0 105:1004.0 106:290.0 108:614.0 109:94.0 110:16143.0 111:1696.0 112:1942.0 113:28962.			17915	12294	8934	10049	15422	16786	7103	11889	13959	12369	17380	11583	18370	13161	22645	13990.6	4103.87			5778	6920	12567	12459	7639	6834	12288	15779	12111	20799	10659	12761	11382.8	4267.88		0.813606	0.119507	2-ketoisocaproic acid
294986	884907	390	294986	85:305.0 86:472.0 88:74.0 89:547.0 90:145.0 93:7.0 94:118.0 96:294.0 98:397.0 99:507.0 100:175.0 101:846.0 103:8609.0 104:985.0 105:326.0 106:86.0 107:126.0 108:114.0 109:59.0 110:238.0 112:143.0 113:365.0 114:631.0 115:113.0 116:1049.0 117:2762.0 118:387			119	257	529	1523	556	1358	2226	303	345	1283	2217	872	880	309	750	901.8	684.214			694	1071	997	355	359	227	322	544	1600	341	818	1519	737.25	472.811		0.817532	0.485742	294986
trihydroxypyrazine	505411	344	339458	88:18.0 91:150.0 98:73.0 99:1508.0 100:1273.0 101:173.0 102:122.0 103:83.0 104:46.0 109:2.0 111:144.0 114:135.0 115:137.0 117:515.0 118:76.0 119:40.0 120:113.0 124:23.0 126:321.0 127:167.0 128:138.0 129:109.0 131:758.0 132:117.0 133:301.0 139:11.0 140:85.	n/a	20221599	304	382	1043	279	716	451	555	215	249	254	587	357	240	433	896	464.067	252.192			270	363	229	605	405	301	249	215	429	783	264	441	379.5	170.307		0.81777	0.330357	trihydroxypyrazine
307909	698816	218	307909	85:11.0 87:44.0 88:12.0 89:22763.0 90:1820.0 91:449.0 92:4.0 96:19.0 98:8.0 99:178.0 100:1499.0 101:589.0 102:775.0 103:6105.0 104:462.0 105:478.0 106:6.0 107:6.0 108:6.0 111:28.0 112:11.0 113:27.0 114:266.0 115:69.0 116:446.0 117:1647.0 118:92.0 120:6.0			1045	621	895	1097	2123	1271	2536	428	964	559	1717	1175	1363	733	1228	1183.67	577.969			596	1366	445	1580	525	1623	425	374	816	1899	312	1666	968.917	604.92		0.818572	0.356296	307909
227352	927021	132	227352	85:89.0 86:554.0 89:5802.0 90:513.0 91:6510.0 92:665.0 93:270.0 95:49.0 97:43.0 98:204.0 99:336.0 100:858.0 101:1235.0 102:999.0 103:23328.0 104:3190.0 105:6018.0 106:566.0 111:150.0 112:153.0 113:307.0 114:377.0 115:804.0 116:635.0 117:10787.0 118:1182.0			1541	2441	799	1884	509	1105	810	575	1888	1209	1456	972	2073	724	1163	1276.6	585.982			1491	918	1166	544	699	1202	792	1874	1060	490	691	1639	1047.17	443.401		0.820278	0.272551	227352
241882	330639	160	241882	85:1082.0 86:1742.0 87:1357.0 89:5406.0 91:197.0 93:1552.0 94:11.0 95:1313.0 96:652.0 99:13970.0 100:4450.0 101:1801.0 102:2061.0 103:63.0 107:9707.0 108:396.0 109:143.0 110:7631.0 111:3515.0 112:632.0 115:621.0 118:236.0 119:158.0 120:109.0 121:28.0 124:			6883	4418	7514	7430	10829	6215	7510	3160	2786	4126	8599	5267	4301	7711	13152	6660.07	2839.7			3766	5710	3583	6569	4623	4922	4716	3589	8436	8832	5213	5899	5488.17	1737.3		0.824041	0.222268	241882
oleamide	852319	144	223498	85:365.0 86:138.0 88:19.0 90:513.0 91:950.0 93:451.0 94:355.0 95:697.0 96:1046.0 97:1067.0 98:272.0 99:272.0 100:961.0 101:98.0 102:54.0 105:52.0 108:355.0 109:202.0 110:531.0 111:151.0 112:157.0 113:83.0 114:23.0 115:2022.0 116:7970.0 117:710.0 118:71.0	n/a	5283387	4129	3011	1222	2234	1544	3690	1865	1862	3910	1875	2837	5638	7062	6985	4974	3522.53	1917.26			1729	1603	2175	1126	1177	6584	3390	2869	4260	2246	3004	4677	2903.33	1622.39		0.824217	0.381202	oleamide
213972	194467	104	213972	85:293.0 86:101.0 88:176.0 89:6272.0 90:448.0 91:287.0 93:45.0 95:26.0 97:11.0 99:27.0 100:270.0 101:10.0 102:94.0 103:95.0 104:4508.0 105:371.0 106:151.0 112:133.0 117:334.0 118:41.0 119:1988.0 120:172.0 121:35.0 125:216.0 126:15.0 131:2.0 133:2.0 147:12			118724	84224	26425	45721	158028	21286	82694	31547	108338	48846	110948	101331	88684	31888	65822	74967.1	40400.7			50797	45810	49142	21379	33832	94827	129476	134136	20163	26034	115931	20059	61798.8	44253.1		0.824346	0.427359	213972
369638	644843	278	369638	86:92.0 89:698.0 95:264.0 96:629.0 100:191.0 101:58.0 103:174.0 104:98.0 109:139.0 113:13.0 116:137.0 117:423.0 125:7.0 129:372.0 130:144.0 135:35.0 136:82.0 137:142.0 138:47.0 140:4.0 143:150.0 149:308.0 151:34.0 153:2029.0 154:531.0 155:160.0 156:125.0			1767	1159	1245	1208	1376	790	1562	718	1422	1171	1748	1038	1108	1028	1609	1263.27	317.317			1080	918	648	738	670	1507	1540	1119	1208	852	1057	1179	1043	294.75		0.825637	0.076323	369638
maltose	948458	361	370112	89:1218.0 90:106.0 100:138.0 101:348.0 102:158.0 103:2676.0 104:149.0 105:432.0 108:46.0 109:51.0 113:135.0 114:87.0 115:143.0 116:121.0 117:2333.0 118:76.0 119:66.0 127:8.0 128:25.0 129:2179.0 130:247.0 132:30.0 133:895.0 134:133.0 137:110.0 139:94.0 140	C00208	6255	501	150	1599	429	774	397	274	309	299	324	336	461	356	326	487	468.133	342.713			330	378	229	426	413	269	287	467	781	367	259	435	386.75	146.206		0.826154	0.450628	maltose
1,5-anhydroglucitol	633295	217	199788	85:181.0 86:15.0 87:193.0 88:25.0 89:817.0 90:31.0 91:53.0 92:18.0 93:16.0 94:1.0 95:2.0 96:5.0 97:225.0 98:3.0 99:149.0 100:25.0 101:1594.0 102:172.0 103:2896.0 104:202.0 105:151.0 106:9.0 107:14.0 109:3.0 110:4.0 111:132.0 113:300.0 114:37.0 115:397.0 1	C07326	64960	105473	114932	139501	109573	198960	107046	138340	108964	133322	64707	123574	110183	81098	99532	84143	114623	31298.9			72888	99497	96358	97913	78585	131501	101631	111843	102083	75357	103179	66494	94777.4	18497.8		0.826861	0.0640036	1,5-anhydroglucitol
309642	227707	173	309642	85:2112.0 86:2692.0 87:3442.0 88:8635.0 89:4668.0 90:1118.0 91:984.0 92:108.0 93:600.0 95:1099.0 96:173.0 97:2311.0 98:2706.0 99:7026.0 100:544.0 101:10715.0 102:2112.0 103:7522.0 104:950.0 105:5433.0 106:414.0 107:326.0 108:86.0 110:781.0 111:133.0 113:1			2131	3215	6532	4679	4595	3019	2785	3393	2158	2727	2778	2862	2957	5040	3156	3468.47	1212.68			2553	2470	2415	1925	4653	2298	2849	4209	2518	2485	3208	2847	2869.17	800.401		0.827215	0.153563	309642
glutamic acid	529370	246	199604	85:432.0 86:300.0 87:125.0 88:102.0 89:103.0 90:34.0 91:11.0 92:1.0 93:25.0 94:4.0 95:24.0 96:26.0 97:10.0 98:139.0 99:153.0 100:1571.0 101:279.0 102:133.0 103:244.0 104:23.0 105:96.0 106:2.0 107:49.0 108:7.0 109:15.0 110:39.0 111:13.0 112:197.0 113:181.0	C00025	33032	4625	10243	11008	14454	14968	33413	18240	26958	26898	23111	9944	7753	23790	7442	8219	16071.1	8814.07			9353	20259	32370	12920	15277	6087	7071	15825	10665	15957	6142	8377	13358.6	7497.65		0.831219	0.404583	glutamic acid
226860	690521	139	226860	86:630.0 87:127.0 91:34.0 92:3.0 94:244.0 95:549.0 97:23.0 98:14.0 99:11.0 100:230.0 101:110.0 102:107.0 103:595.0 105:181.0 107:441.0 109:79.0 110:507.0 111:1432.0 112:474.0 113:4.0 114:58.0 115:20.0 116:124.0 117:335.0 118:50.0 120:12.0 123:3.0 124:176.			4286	982	1279	2000	2055	2048	2808	443	447	1359	2464	1842	906	1075	5969	1997.53	1481.62			882	1473	950	2536	900	3903	865	605	2239	2980	941	1673	1662.25	1038.36		0.832151	0.513249	226860
213697	456893	232	213697	86:2775.0 87:1232.0 88:314.0 89:512.0 92:2.0 93:4.0 94:14.0 99:7.0 100:22496.0 101:2806.0 102:1248.0 103:1570.0 104:214.0 105:567.0 107:24.0 108:5.0 109:7.0 114:3170.0 115:3935.0 116:937.0 117:3696.0 118:495.0 119:810.0 120:83.0 121:67.0 123:32.0 125:17.0			1390	377	567	585	1576	1389	1436	1167	1374	689	1772	624	260	4364	1163	1248.87	983.312			280	1079	1261	2867	2539	375	368	637	647	1383	564	472	1039.33	857.608		0.832221	0.565995	213697
aspartic acid	478092	232	227949	85:2063.0 86:5075.0 87:2324.0 88:1379.0 89:1552.0 90:66.0 91:612.0 94:23.0 97:10.0 98:4313.0 99:3117.0 100:120984.0 101:14861.0 102:6717.0 103:6663.0 104:839.0 105:1167.0 106:77.0 107:388.0 109:48.0 110:186.0 111:58.0 112:352.0 113:625.0 114:2006.0 115:93	C00049	5960	1429	1332	2539	1728	1666	1608	2072	1307	1880	982	1564	972	2139	1178	2130	1635.07	455.074			1043	1416	1207	1034	1464	1620	1271	1900	1206	1761	1298	1122	1361.83	278.994		0.832892	0.0807189	aspartic acid
226846	442001	258	226846	85:516.0 86:4985.0 87:1913.0 88:297.0 92:159.0 93:106.0 94:14.0 95:203.0 96:170.0 98:803.0 99:986.0 100:14054.0 101:2504.0 102:2719.0 103:1008.0 104:16.0 105:244.0 107:642.0 109:131.0 110:529.0 111:26.0 112:195.0 113:879.0 114:3258.0 115:2435.0 116:1107.0			780	512	1930	983	1845	1426	2112	618	363	655	1774	635	598	1259	1850	1156	613.709			389	747	407	2135	650	212	763	389	1608	2631	668	955	962.833	761.317		0.832901	0.471775	226846
200448	414055	140	200448	85:125.0 86:268.0 87:18.0 88:35.0 89:139.0 90:70.0 91:4.0 92:3.0 93:3.0 94:6.0 96:11.0 97:29.0 98:8.0 100:253.0 101:13.0 102:95.0 104:3.0 106:2.0 108:4.0 109:6.0 110:93.0 111:1.0 112:34.0 113:9.0 114:16.0 115:6.0 116:1.0 117:5.0 118:1.0 122:4.0 126:4.0 12			3182	2598	3658	5375	8965	4519	7677	1613	1155	2102	10448	2987	2146	7995	15752	5344.8	4083.59			1982	3669	1342	11018	3956	1787	1713	1601	7010	12800	2335	4262	4456.25	3852.12		0.833754	0.5698	200448
199596	246426	85	199596	85:23022.0 86:1166.0 89:53.0 91:38.0 92:26.0 94:12.0 95:19.0 98:4618.0 99:4120.0 100:151.0 101:56.0 102:55.0 105:14.0 107:182.0 108:2.0 109:54.0 110:108.0 112:1849.0 113:2524.0 114:164.0 115:265.0 117:699.0 118:122.0 119:9.0 120:7.0 121:132.0 122:1.0 123:			4493	6076	20201	6430	4347	5369	6477	5187	6132	5406	6632	4817	4358	7353	7461	6715.93	3866.44			6595	5922	5354	4149	6009	6934	5022	4367	6212	4778	5829	6258	5619.08	883.799		0.836679	0.346589	199596
cysteine-glycine	715639	220	227594	86:555.0 88:246.0 91:545.0 98:58.0 100:2576.0 101:711.0 102:497.0 106:180.0 111:45.0 114:75.0 115:246.0 116:1217.0 117:850.0 118:37.0 120:19.0 127:7.0 128:7.0 129:276.0 130:700.0 132:1267.0 134:167.0 140:83.0 141:169.0 142:388.0 146:312.0 147:12.0 148:19.	C01419	439498	222	656	430	513	287	796	296	604	601	423	648	675	775	516	1011	563.533	213.344			303	353	584	359	409	324	661	337	485	587	660	631	474.417	142		0.841861	0.226012	cysteine-glycine
220259	547353	243	220259	85:90.0 86:671.0 87:261.0 89:194.0 90:44.0 91:115.0 92:80.0 96:35.0 98:135.0 99:383.0 100:677.0 101:353.0 102:554.0 103:1655.0 104:150.0 105:96.0 107:306.0 108:26.0 110:72.0 112:330.0 113:278.0 114:124.0 115:194.0 116:85.0 119:254.0 120:46.0 123:4.0 125:3			563	483	1446	1356	2052	1437	2259	558	335	715	1305	829	589	1904	1950	1185.4	648.117			482	1052	458	2745	905	452	390	292	1546	2470	500	715	1000.58	830.265		0.844089	0.521457	220259
226848	827200	202	226848	85:655.0 86:957.0 87:144.0 88:381.0 89:150.0 91:189.0 92:40.0 97:855.0 98:426.0 99:428.0 100:701.0 101:847.0 102:547.0 103:8006.0 104:771.0 105:372.0 107:3.0 110:7.0 111:139.0 112:301.0 113:106.0 114:330.0 115:167.0 116:1925.0 117:1635.0 118:254.0 124:28.			22918	13958	6977	10441	17242	16209	20114	8656	12027	12665	21891	13067	14543	10189	23606	14966.9	5242.24			6814	8920	8702	9421	7068	12066	15400	12153	20365	15052	14848	21136	12662.1	4818.78		0.846008	0.25067	226848
295046	837708	290	295046	85:288.0 89:7.0 94:32.0 97:87.0 99:5.0 100:172.0 103:586.0 107:158.0 111:98.0 112:172.0 113:8.0 123:51.0 124:17.0 125:25.0 134:3012.0 138:20.0 140:17.0 142:46.0 152:16.0 156:34.0 158:7.0 160:73.0 169:23.0 170:48.0 171:51.0 174:25.0 179:20.0 184:112.0 186:			334	458	993	663	844	1193	1176	432	397	365	1371	862	431	1009	522	736.667	348.651			712	785	524	671	391	424	388	261	928	928	668	819	624.917	224.096		0.848303	0.345809	295046
uridine	856953	258	213127	85:2472.0 86:1478.0 87:1633.0 88:576.0 89:3553.0 90:421.0 91:253.0 92:172.0 93:316.0 94:534.0 95:1117.0 96:2472.0 97:1997.0 98:1743.0 99:16654.0 100:10368.0 101:8412.0 102:3218.0 103:20005.0 104:2189.0 105:1295.0 106:340.0 107:121.0 108:303.0 109:830.0 11	C00299	6029	648	555	506	825	891	940	996	670	692	719	897	732	899	507	763	749.333	156.789			740	672	651	580	503	267	353	874	718	681	847	773	638.25	185.383		0.851757	0.103944	uridine
fructose	638631	307	199188	85:645.0 86:352.0 87:716.0 88:631.0 89:7375.0 90:629.0 91:409.0 93:11.0 94:47.0 95:10.0 97:25.0 98:138.0 99:341.0 100:1271.0 101:1713.0 102:501.0 103:47609.0 104:4534.0 105:2290.0 106:148.0 107:28.0 108:7.0 110:35.0 111:104.0 112:36.0 113:434.0 114:1984.0	C00095	5984	5153	2934	837	1705	2072	1651	827	1237	963	1617	2474	1953	1675	888	2004	1866	1097.41			741	1483	1141	4848	1245	1429	1675	1730	1170	1102	1243	1375	1598.5	1057.46		0.856645	0.528307	fructose
hydroxycarbamate	325357	278	203241	85:670.0 86:1646.0 87:4413.0 88:509.0 89:1825.0 90:194.0 91:3279.0 92:1671.0 93:61.0 94:72.0 95:119.0 96:162.0 97:152.0 98:342.0 99:339.0 100:6634.0 101:951.0 102:725.0 103:1319.0 104:211.0 105:978.0 106:77.0 107:235.0 108:22.0 113:180.0 114:151.0 115:151	n/a	18931500	1149	996	2855	1131	1201	1264	1778	625	428	676	2090	834	776	1548	2224	1305	678.102			788	1116	654	2283	1145	786	577	470	1320	2561	789	933	1118.5	658.544		0.857088	0.478697	hydroxycarbamate
416137	305421	143	416137	85:38.0 88:115.0 90:267.0 91:87.0 93:13.0 94:23.0 99:374.0 100:1655.0 101:412.0 102:166.0 104:313.0 108:119.0 109:34.0 110:126.0 114:51.0 116:1830.0 118:67.0 120:2798.0 121:223.0 122:162.0 127:68.0 130:287.0 134:451.0 139:3.0 140:43.0 141:14.0 142:72.0 14			3192	3374	15051	4602	4236	2117	5009	2731	2907	4461	5411	3861	3848	7722	7643	5077.67	3194.93			5863	4742	4201	5031	6036	586	2121	3052	5213	6434	5079	3894	4354.33	1716.74		0.857546	0.487177	416137
cystine	804143	218	223490	86:679.0 87:225.0 88:10.0 90:102.0 91:35.0 98:43.0 100:9221.0 101:1180.0 102:559.0 103:367.0 105:127.0 106:13.0 113:26.0 114:903.0 115:2311.0 116:1566.0 117:381.0 118:111.0 120:264.0 124:51.0 128:36.0 129:197.0 130:564.0 131:766.0 132:2303.0 133:762.0 134	C00491	67678	160	3215	6817	15963	5116	17230	5985	8298	11184	20210	14901	26851	20879	9064	8187	11604	7470.13			7326	7739	19753	7712	11017	272	2526	6317	10266	10864	19959	15829	9965	6117.58		0.858756	0.545653	cystine
monopalmitin-1-glyceride	901207	371	202859	85:631.0 86:60.0 87:31.0 88:69.0 89:113.0 91:26.0 92:8.0 93:48.0 95:909.0 96:19.0 97:532.0 98:174.0 99:191.0 101:1315.0 102:107.0 103:1040.0 104:45.0 105:19.0 107:8.0 109:435.0 110:6.0 111:104.0 113:36.0 115:74.0 116:861.0 117:1193.0 118:74.0 121:4.0 123:	n/a	14900	351	176	632	249	148	181	224	116	180	188	295	174	214	206	307	242.733	124.68			211	204	188	168	246	318	196	174	253	201	164	183	208.833	44.2058		0.860341	0.37934	monopalmitin-1-glyceride
arachidic acid	855930	117	410997	85:8076.0 86:1336.0 87:2806.0 88:1176.0 89:5648.0 90:1111.0 91:1527.0 93:2516.0 95:11286.0 97:16029.0 98:12627.0 99:6902.0 101:2502.0 103:3568.0 105:5753.0 106:657.0 107:1712.0 108:668.0 109:4549.0 110:895.0 111:6335.0 112:3607.0 113:262.0 114:1039.0 116:			5174	5703	10042	8313	4289	7234	5235	5072	5822	1683	9275	6483	7433	4723	7508	6265.93	2119.29			5082	6497	6056	1447	3324	7491	4835	5771	6816	4421	5841	7323	5408.67	1741.34		0.863186	0.269959	arachidic acid
199203	663983	204	199203	85:967.0 86:231.0 87:94.0 88:2.0 89:240.0 90:12.0 91:16.0 93:7.0 95:25.0 97:47.0 98:8.0 99:283.0 100:87.0 101:286.0 102:9.0 103:1110.0 104:45.0 105:29.0 106:8.0 107:5.0 109:12.0 111:86.0 112:26.0 113:199.0 114:8.0 115:28.0 116:134.0 117:930.0 118:55.0 119			3306	22567	14118	15982	11411	17750	14194	11976	19200	11471	15858	12560	14170	15534	18858	14597	4441.64			9871	12307	3332	9132	15850	12123	16397	13150	13532	8647	26895	10004	12603.3	5709.22		0.863419	0.316758	199203
threitol	467314	217	202661	85:64.0 87:55.0 88:18.0 89:326.0 90:8.0 91:65.0 92:7.0 93:590.0 95:158.0 99:56.0 101:1014.0 102:45.0 103:2102.0 104:169.0 105:112.0 110:13.0 111:1.0 113:2.0 115:101.0 116:377.0 117:1375.0 118:138.0 119:84.0 127:3.0 129:383.0 130:28.0 131:441.0 132:20.0 13	n/a	169019	1417	838	815	760	638	836	706	887	791	382	783	814	686	542	678	771.533	221.276			732	525	688	483	773	791	603	549	806	780	762	504	666.333	124.68		0.863648	0.154706	threitol
nicotinic acid	354525	180	212606	85:1565.0 86:177.0 87:17.0 88:57.0 89:16.0 90:103.0 93:29.0 94:66.0 98:24.0 100:140.0 102:12.0 103:57.0 105:28.0 106:1516.0 107:16.0 108:43.0 110:194.0 112:16.0 116:33.0 120:18.0 121:7.0 122:10.0 130:40.0 131:21.0 132:106.0 133:4.0 135:11.0 136:1250.0 137	C00253	938	4716	3076	18667	11769	14022	9497	10378	2143	1410	4463	11414	4390	2840	11624	18869	8618.53	5820.33			5184	7980	3196	20841	5708	3997	2439	1898	11317	17764	3741	5408	7456.08	6127.3		0.865122	0.618799	nicotinic acid
dithiothreitol	525104	116	414965	85:3847.0 86:558.0 87:2019.0 88:404.0 89:1165.0 90:900.0 91:2477.0 92:348.0 93:886.0 94:1710.0 95:370.0 97:428.0 98:210.0 99:2103.0 100:791.0 101:47068.0 102:5070.0 103:5474.0 104:674.0 105:2947.0 106:405.0 107:604.0 109:180.0 110:12.0 111:1178.0 112:162.			50966	68599	56983	73036	39803	81903	71190	53121	68998	62502	63427	77967	83868	41245	92769	65758.5	15386.5			72148	54659	64344	36620	36168	52920	46118	64079	50389	56480	79947	70110	56998.5	13704		0.866786	0.135687	dithiothreitol
glyceric acid	373972	189	228009	85:1195.0 86:478.0 87:434.0 88:161.0 89:1066.0 90:229.0 94:1.0 96:9.0 99:243.0 100:283.0 101:1791.0 102:6647.0 103:5903.0 104:836.0 105:324.0 106:59.0 107:480.0 108:13.0 109:43.0 110:37.0 112:44.0 113:165.0 114:56.0 115:300.0 116:271.0 117:3735.0 118:267.	C00258	439194	20082	12236	7423	13717	16826	11885	11555	10815	9083	11953	17343	9905	5751	11022	21617	12747.5	4470.03			10077	13486	5455	15035	10973	7564	9474	13843	11780	15401	7388	12414	11074.2	3179.99		0.86873	0.285007	glyceric acid
218787	435590	228	218787	85:286.0 86:933.0 87:676.0 88:518.0 89:66.0 90:104.0 91:643.0 92:355.0 93:168.0 94:598.0 95:466.0 96:1077.0 97:434.0 98:174.0 99:233.0 100:513.0 101:311.0 102:235.0 103:333.0 104:238.0 106:66.0 107:197.0 108:364.0 109:319.0 110:9469.0 111:1747.0 112:389.0			1669	1335	4929	4138	2613	880	1649	1502	970	2089	1873	1001	1490	2143	3054	2089	1166.77			1879	2278	1908	2770	2128	1332	46	1656	1191	3187	1682	1839	1824.67	792.805		0.873464	0.509249	218787
isolinoleic acid	794629	95	269289	85:4353.0 86:2726.0 87:970.0 88:802.0 89:2639.0 90:417.0 91:17689.0 92:4288.0 93:23399.0 94:17608.0 95:32507.0 96:20282.0 97:9386.0 98:2851.0 99:2570.0 100:540.0 101:1236.0 102:336.0 103:557.0 104:775.0 105:6316.0 106:2886.0 107:12052.0 108:10225.0 109:13	n/a	3931	430	613	1134	455	440	582	605	365	541	459	569	598	494	610	526	561.4	176.314			410	477	543	533	402	714	466	531	446	375	666	348	492.583	111.854		0.87742	0.251528	isolinoleic acid
glucose-1-phosphate	594823	217	199178	85:269.0 86:53.0 87:340.0 88:128.0 90:16.0 91:60.0 92:39.0 93:4.0 94:12.0 95:129.0 96:6.0 97:28.0 99:345.0 100:23.0 101:954.0 102:82.0 103:1518.0 104:100.0 105:139.0 107:22.0 109:58.0 110:7.0 111:252.0 112:8.0 113:466.0 114:44.0 115:401.0 116:421.0 117:14	C00103	65533	879	698	1595	1213	1167	923	797	956	743	908	1026	863	767	982	1272	985.933	239.313			861	876	892	680	957	943	774	1096	902	799	776	858	867.833	106.549		0.880215	0.125799	glucose-1-phosphate
lysine	662525	156	328426	86:1341.0 88:487.0 89:509.0 98:24.0 99:84.0 100:1370.0 101:296.0 102:187.0 103:1551.0 105:41.0 107:4.0 110:118.0 112:254.0 113:58.0 114:497.0 115:204.0 117:599.0 118:176.0 120:6.0 123:45.0 126:219.0 128:1256.0 129:179.0 130:1057.0 131:278.0 132:190.0 133:	C00047	5962	80552	84337	50961	55557	65462	105854	101519	76840	88675	82959	82149	68568	60666	49684	83682	75831	17066.5			61624	68340	63106	70938	65407	91237	74138	48910	76144	57399	52580	72491	66859.5	11454.2		0.881691	0.131619	lysine
214535	867659	129	214535	85:50.0 87:24.0 90:2.0 91:2.0 92:2.0 93:3.0 97:18.0 98:3.0 99:1.0 101:131.0 103:174.0 107:7.0 108:5.0 113:8.0 114:5.0 115:80.0 117:200.0 127:16.0 129:1850.0 130:186.0 131:249.0 132:14.0 133:40.0 134:6.0 140:1.0 141:1.0 142:5.0 143:16.0 144:1.0 145:63.0 14			500	534	1005	963	1096	837	1113	1251	2228	1358	2155	1237	1714	2492	1120	1306.87	594.27			1319	1006	1070	376	2664	471	406	1543	920	776	1616	1674	1153.42	660.603		0.882582	0.531445	214535
226910	793299	173	226910	85:1606.0 86:531.0 87:21.0 88:462.0 89:1113.0 90:16.0 95:73.0 98:180.0 99:172.0 100:792.0 101:237.0 102:959.0 103:5025.0 104:375.0 105:101.0 111:94.0 112:210.0 113:325.0 114:233.0 115:79.0 116:1191.0 117:2346.0 118:149.0 125:74.0 128:157.0 129:744.0 130:8			4172	1854	605	714	1467	1807	1295	497	1465	967	1375	1369	1149	660	2354	1450	912.837			488	520	417	897	295	3263	2362	975	1917	1929	671	1631	1280.42	933.402		0.883046	0.638957	226910
arabinose	546892	217	202065	85:160.0 86:252.0 87:292.0 88:166.0 89:2168.0 90:172.0 92:26.0 94:21.0 98:58.0 99:73.0 100:685.0 101:880.0 102:422.0 103:18038.0 104:1788.0 105:1402.0 106:81.0 108:1.0 109:1.0 111:16.0 112:21.0 113:153.0 114:341.0 115:413.0 116:237.0 117:1997.0 118:201.0	C00259	229	779	837	1328	772	1205	1134	975	1007	675	643	915	511	1006	755	920	897.467	221.007			557	650	906	852	929	975	647	626	852	1109	640	768	792.583	170.717		0.883134	0.188776	arabinose
N-acetylglycine	356109	174	386210	86:561.0 87:403.0 88:644.0 89:35.0 99:219.0 100:176.0 101:274.0 102:648.0 104:5441.0 105:335.0 106:5.0 107:486.0 110:168.0 114:460.0 116:32.0 117:38.0 121:7.0 127:384.0 130:6095.0 131:81.0 132:3092.0 133:35.0 136:105.0 138:17.0 139:26.0 143:55.0 144:59.0	n/a	10972	826	430	914	600	820	489	266	426	456	316	276	661	551	466	776	551.533	208.277			690	457	238	697	404	325	350	277	1027	535	423	448	489.25	222.317		0.887072	0.460561	N-acetylglycine
240265	672366	139	240265	87:3622.0 88:477.0 94:234.0 95:520.0 97:402.0 98:383.0 100:970.0 108:130.0 110:443.0 111:1137.0 112:541.0 114:321.0 117:476.0 122:62.0 123:32.0 124:75.0 127:5.0 134:3402.0 136:264.0 138:272.0 139:8576.0 140:729.0 142:9.0 143:879.0 144:24.0 147:5521.0 148:			4681	1393	2132	2379	2897	2892	3450	728	707	1424	3102	2263	1532	1792	6976	2556.53	1619.13			1396	1778	866	3998	1037	3748	1191	896	3325	5366	1204	2435	2270	1494.9		0.887921	0.64065	240265
229268	407022	263	229268	85:1296.0 86:1190.0 87:1319.0 88:1347.0 89:535.0 90:101.0 94:1505.0 95:768.0 96:1076.0 98:1853.0 99:3947.0 100:1153.0 101:1082.0 102:1699.0 103:3331.0 104:240.0 105:355.0 107:891.0 108:1306.0 109:81.0 110:1027.0 111:4201.0 112:874.0 113:1039.0 114:689.0 1			3511	2101	4941	3940	3806	1277	3971	431	1231	2161	4264	2261	1687	3651	5615	2989.87	1508.14			2727	3117	2075	3288	2452	2936	1688	1949	3162	3744	2487	2244	2655.75	614.19		0.88825	0.47882	229268
beta-alanine	435375	248	233412	86:21789.0 87:7246.0 88:5778.0 89:4138.0 90:624.0 91:11715.0 92:587.0 93:1760.0 97:3377.0 98:1347.0 99:5303.0 100:17860.0 101:5739.0 102:5352.0 103:7699.0 104:22951.0 105:3353.0 106:134.0 107:3441.0 108:294.0 109:5375.0 110:4964.0 113:3606.0 114:774.0 115	C00099	239	578	374	845	348	257	375	417	223	140	269	459	209	259	342	624	381.267	184.906			303	358	271	474	299	453	422	266	295	308	265	352	338.833	73.7697		0.888704	0.462329	beta-alanine
fucose + rhamnose	577861	117	205102	85:162.0 86:172.0 87:161.0 88:13.0 89:1088.0 90:62.0 91:58.0 92:5.0 93:45.0 94:1.0 95:5.0 96:8.0 97:10.0 98:6.0 99:76.0 100:394.0 101:397.0 102:153.0 103:322.0 104:16.0 105:349.0 106:43.0 107:24.0 108:6.0 109:7.0 110:10.0 111:7.0 112:23.0 113:34.0 114:182	C01018	94270	3606	2783	3118	2868	3151	6572	4513	2016	2014	1827	3555	3582	3339	1438	4632	3267.6	1299.01			2364	3203	5657	3045	1356	2663	2667	2530	3566	2855	1561	3391	2904.83	1091.78		0.888981	0.446948	fucose + rhamnose
203761	1250082	309	203761	85:113.0 91:18.0 92:10.0 93:96.0 94:16.0 95:349.0 96:99.0 97:114.0 98:22.0 99:34.0 102:4.0 103:100.0 104:5.0 105:4.0 107:15.0 108:4.0 109:54.0 110:28.0 111:15.0 113:50.0 114:1.0 115:6.0 116:4.0 118:5.0 119:7.0 121:22.0 122:6.0 123:48.0 124:7.0 125:15.0 12			1491	866	556	709	745	587	1272	388	873	276	1425	1021	663	659	485	801.067	363.299			573	406	503	312	433	879	2032	992	759	404	507	754	712.833	465.542		0.889855	0.584687	203761
glutamine minor	570071	173	362100	85:1016.0 86:25398.0 87:1749.0 88:8.0 89:34.0 90:3171.0 91:226.0 98:25.0 99:533.0 100:840.0 101:77.0 102:466.0 103:292.0 105:8.0 106:4.0 109:5.0 112:65.0 113:348.0 114:168.0 115:1143.0 116:208.0 117:189.0 124:4.0 126:31.0 127:193.0 128:905.0 129:352.0 130			9005	7896	7114	7060	12462	9809	10110	6238	5683	4106	7228	9609	9817	7937	11093	8344.47	2207.73			6794	4963	4051	5753	4886	9918	8759	8218	9987	6640	10940	8218	7427.25	2253.75		0.890081	0.297987	glutamine minor
adipic acid	475399	111	218815	85:15.0 86:93.0 94:8.0 95:78.0 96:4.0 99:123.0 102:79.0 107:140.0 109:4.0 111:2899.0 112:116.0 113:68.0 114:100.0 116:84.0 117:256.0 120:3.0 121:6.0 123:9.0 124:32.0 125:23.0 126:70.0 129:429.0 130:50.0 131:111.0 132:49.0 135:6.0 136:2.0 139:26.0 140:7.0	C06104	196	891	1222	3669	1999	890	1713	1230	913	1158	1177	1285	989	931	1109	1778	1396.93	715.137			1353	1853	1221	827	1654	1100	1005	1283	1353	1293	1015	998	1246.25	291.054		0.892133	0.500352	adipic acid
salicylic acid	480445	267	199200	85:187.0 86:25.0 87:72.0 88:1.0 89:245.0 90:160.0 91:1766.0 92:425.0 93:149.0 94:3.0 95:122.0 97:92.0 98:23.0 99:8.0 100:498.0 101:55.0 102:29.0 103:165.0 104:34.0 105:321.0 106:19.0 107:53.0 108:3.0 109:16.0 110:37.0 111:17.0 113:50.0 114:7.0 115:314.0 1	C00805	338	644	1125	2771	1110	829	788	887	868	1025	881	971	936	1111	562	1456	1064.27	518.594			1390	1003	1180	771	913	1128	496	725	969	771	1120	942	950.667	239.792		0.89326	0.490792	salicylic acid
238320	855550	187	238320	85:175.0 86:83.0 88:39.0 91:1018.0 92:24.0 95:1141.0 97:1855.0 99:21.0 101:264.0 103:1639.0 104:171.0 109:528.0 111:588.0 112:13.0 113:1.0 115:49.0 116:10.0 117:2099.0 122:16.0 123:294.0 126:4.0 129:2281.0 130:166.0 131:6081.0 132:1396.0 137:14.0 144:40.0			4167	4231	6049	2950	3387	4053	3972	3802	4026	2796	4318	3267	3240	2403	5580	3882.73	974.956			3837	1931	2931	2447	2769	4657	3767	3330	4848	3620	3531	3976	3470.33	854.378		0.893786	0.259981	238320
309540	741287	117	309540	85:862.0 86:114.0 88:37.0 89:965.0 91:108.0 93:722.0 95:2787.0 96:258.0 97:2929.0 98:1690.0 99:1030.0 100:67.0 101:110.0 105:1168.0 107:543.0 108:2.0 109:930.0 110:136.0 111:1011.0 112:273.0 113:11.0 114:25.0 115:117.0 116:1879.0 117:37278.0 118:3193.0 11			1842	1544	3829	2373	1863	2437	1214	1103	846	1349	1892	2047	1744	2261	1893	1882.47	709.965			1396	1936	2208	1397	1809	1468	1520	1651	1544	1662	2192	1468	1687.58	288.934		0.896474	0.381472	309540
425155	232553	156	425155	85:4.0 86:361.0 88:9.0 95:25.0 96:333.0 99:13.0 100:12.0 107:475.0 109:83.0 110:2411.0 111:273.0 113:20.0 125:1018.0 126:734.0 130:141.0 132:30.0 134:104.0 139:1.0 143:6.0 146:324.0 152:2.0 156:2319.0 157:50.0 163:1.0 166:12.0 169:4.0 180:7.0 183:45.0 184			1219	2421	4050	1875	1140	1197	2617	1858	2008	2143	2833	1906	1407	2604	3330	2173.87	825.736			1436	2439	2686	1693	2572	2571	1980	1228	1591	1907	1691	1598	1949.33	497.949		0.896712	0.415828	425155
299130	401472	213	299130	85:776.0 86:896.0 88:13.0 89:28.0 90:27.0 92:21.0 93:15.0 95:3.0 98:12.0 100:92.0 101:12.0 104:10.0 108:104.0 110:7.0 111:6.0 112:3.0 113:120.0 118:57.0 119:17.0 123:3.0 127:152.0 128:815.0 129:1541.0 130:551.0 133:5.0 134:157.0 139:4.0 140:91.0 141:308.0			1142	1088	1416	1121	2339	1655	1858	625	392	526	1743	891	725	1573	3304	1359.87	767.297			418	649	380	2695	842	519	1205	409	1871	3899	575	1175	1219.75	1093.85		0.896963	0.699116	299130
asparagine	551139	116	307890	85:1252.0 86:4306.0 87:1822.0 88:1900.0 89:3593.0 90:3651.0 91:252.0 92:76.0 96:121.0 97:393.0 98:4971.0 99:3535.0 100:36180.0 101:6289.0 102:5611.0 103:4037.0 106:477.0 110:1113.0 111:320.0 112:297.0 113:1915.0 114:9996.0 115:9536.0 116:129085.0 117:1885	C00152	236	1759	3004	3060	3360	3943	9916	6468	18563	4340	2636	5806	7236	11294	4202	12008	6506.33	4623.98			3155	3225	3072	4937	3089	4348	6318	9934	3775	11146	13211	4035	5853.75	3558.77		0.8997	0.690915	asparagine
hydrocinnamic acid	435417	104	202602	86:1.0 91:209.0 93:2.0 100:32.0 101:2.0 102:16.0 103:37.0 104:942.0 105:58.0 107:14.0 109:2.0 110:2.0 116:31.0 117:1.0 118:2.0 126:5.0 127:4.0 130:41.0 131:126.0 132:22.0 134:8.0 144:9.0 147:8.0 152:2.0 160:19.0 167:4.0 199:2.0 207:77.0 208:5.0 218:1.0 22	C05629	107	947	1311	1972	813	902	1361	1555	440	1088	1133	723	1213	1265	1850	1661	1215.6	424.328			1295	849	1235	986	563	995	595	531	1214	1628	1626	1659	1098	414.654		0.903258	0.476519	hydrocinnamic acid
arginine + ornithine	619420	142	199796	85:16.0 86:326.0 87:20.0 89:2.0 90:3.0 91:42.0 92:24.0 93:6.0 94:2.0 95:5.0 96:10.0 99:8.0 100:288.0 101:27.0 102:107.0 103:10.0 104:2.0 105:1.0 107:15.0 108:5.0 109:3.0 110:11.0 112:6.0 113:27.0 114:51.0 115:4.0 116:25.0 117:19.0 118:8.0 119:3.0 122:6.0	C00062	232	17606	23400	20825	15580	20356	35853	35934	37349	32562	43356	18958	25196	27223	22492	19569	26417.3	8519.19			22065	21678	24320	30432	33367	28237	24462	14602	23413	17802	19676	26493	23878.9	5294.37		0.903913	0.376467	arginine + ornithine
stearic acid	787358	117	199195	85:700.0 86:253.0 87:125.0 88:82.0 89:447.0 90:48.0 91:171.0 92:25.0 93:426.0 94:40.0 95:1020.0 96:117.0 97:1024.0 98:749.0 99:386.0 100:49.0 101:187.0 102:22.0 105:450.0 106:48.0 107:188.0 108:13.0 109:271.0 110:45.0 111:412.0 112:177.0 113:76.0 114:7.0	C01530	5281	303346	279651	367563	381276	262983	404516	224103	189241	205705	230050	351246	279457	300624	321113	258229	290607	65256.5			238751	353442	273484	168948	256409	298736	216802	299978	264793	205719	303343	273069	262790	50053		0.904278	0.235229	stearic acid
199777	675254	217	199777	85:258.0 86:162.0 87:355.0 88:172.0 89:3086.0 90:239.0 91:378.0 92:6.0 93:40.0 94:24.0 95:35.0 96:74.0 97:108.0 98:80.0 99:236.0 100:522.0 101:931.0 102:431.0 103:5496.0 104:522.0 105:624.0 106:60.0 107:16.0 108:21.0 109:202.0 110:186.0 111:194.0 112:105.			67759	57531	38255	47682	62543	63392	53261	59340	61441	54169	61540	47845	53110	37053	72672	55839.5	10056.5			48070	43205	48875	42464	47680	63362	54806	53646	53074	52177	47417	52446	50601.8	5646.94		0.906201	0.120225	199777
xylitol	566749	217	200524	85:24.0 87:3.0 89:179.0 90:5.0 91:4.0 92:17.0 94:3.0 95:1.0 96:6.0 99:16.0 100:8.0 101:175.0 102:1.0 103:1897.0 104:159.0 105:65.0 106:14.0 107:16.0 108:8.0 109:2.0 110:1.0 111:8.0 113:25.0 115:21.0 116:30.0 117:582.0 118:34.0 119:58.0 120:1.0 121:7.0 126	C00379	6912	869	760	860	531	719	963	619	504	434	409	598	525	515	508	1046	657.333	200.142			477	680	598	721	562	458	688	759	371	546	629	665	596.167	117.184		0.906947	0.35826	xylitol
201887	1200427	316	201887	85:2.0 86:8.0 87:5.0 89:34.0 91:1089.0 92:53.0 93:14.0 94:6.0 95:132.0 96:11.0 97:18.0 98:5.0 99:78.0 101:26.0 102:59.0 103:656.0 104:27.0 105:785.0 106:33.0 107:359.0 108:59.0 109:63.0 113:13.0 115:819.0 116:203.0 117:475.0 118:86.0 119:616.0 120:70.0 12			537	480	834	536	291	456	689	202	548	256	722	327	370	539	450	482.467	177.709			435	281	288	239	338	746	704	389	482	341	499	512	437.833	161.054		0.907489	0.505503	201887
272849	221925	115	272849	85:3283.0 86:1365.0 87:220.0 88:1088.0 89:629.0 90:466.0 91:1009.0 92:148.0 93:1.0 95:1.0 96:429.0 97:1464.0 98:2036.0 99:2310.0 100:6474.0 101:2615.0 102:365.0 104:163.0 105:4955.0 106:655.0 107:9796.0 108:11386.0 109:1103.0 110:62560.0 111:2201.0 112:53			50423	77134	235577	82580	55083	37526	64531	48669	72212	69930	71031	70148	70147	90597	64739	77355.1	45838.7			90318	77395	72037	41577	82955	70516	64670	70955	52997	46387	110000	63953	70313.3	18971.3		0.908968	0.623104	272849
tocopherol beta	1022809	222	270413	85:114.0 91:125.0 92:107.0 93:440.0 95:376.0 96:213.0 97:90.0 101:14.0 102:99.0 105:159.0 107:29.0 109:43.0 111:72.0 112:1.0 116:66.0 119:48.0 123:11.0 129:558.0 131:91.0 135:203.0 136:94.0 137:17.0 145:58.0 151:81.0 158:10.0 163:12.0 164:82.0 165:110.0 1	C14152	8989	297	408	955	476	319	304	428	341	501	478	574	338	375	357	409	437.333	164.006			294	308	409	329	464	496	265	411	489	361	546	401	397.75	89.0241		0.909489	0.460015	tocopherol beta
gluconic acid	693140	333	211990	85:147.0 86:29.0 87:286.0 88:169.0 89:1308.0 90:102.0 91:62.0 92:5.0 93:16.0 94:2.0 95:55.0 97:203.0 98:21.0 99:231.0 100:43.0 101:856.0 102:1031.0 103:7085.0 104:680.0 105:353.0 106:22.0 107:72.0 108:5.0 109:8.0 111:89.0 113:194.0 114:12.0 115:293.0 116:	C00257	10690	959	723	841	571	771	674	619	680	729	469	639	725	638	450	811	686.6	133.986			566	686	387	535	751	851	591	751	739	521	753	372	625.25	153.781		0.910647	0.278633	gluconic acid
425281	225119	153	425281	85:33.0 87:5.0 88:491.0 89:14.0 91:114.0 94:1.0 95:11.0 96:6.0 98:621.0 99:4.0 100:115.0 104:5.0 105:109.0 107:8.0 108:124.0 109:13.0 110:1545.0 111:7.0 112:8.0 113:2.0 114:1.0 115:6.0 121:3.0 123:307.0 126:97.0 127:949.0 130:1164.0 134:2667.0 135:248.0 1			1515	1940	4240	2487	3679	2114	2480	2428	722	1797	2666	1888	1658	3897	2904	2427.67	950.906			1378	2625	1353	3360	3677	1100	2017	1216	2355	3309	1354	2795	2211.58	935.882		0.910991	0.559946	425281
204344	246354	147	204344	86:308.0 87:101.0 88:30.0 89:47.0 90:3.0 91:6.0 92:4.0 94:7.0 99:46.0 100:172.0 101:45.0 102:40.0 103:28.0 105:5.0 108:4.0 110:8.0 113:22.0 114:3.0 115:74.0 117:193.0 118:2.0 119:41.0 125:24.0 128:183.0 129:12.0 130:40.0 131:202.0 132:62.0 133:110.0 134:1			83629	100239	217717	79981	69456	67064	93641	59217	99571	71577	100429	74967	74349	83408	74646	89992.7	37565.5			92865	79578	67097	52166	80346	104231	104824	72795	91225	53551	92764	93141	82048.6	17769		0.911725	0.507182	204344
glucuronic acid	666401	333	353273	85:98.0 89:2765.0 90:127.0 91:122.0 92:3.0 93:73.0 96:24.0 97:74.0 100:287.0 101:614.0 102:131.0 103:3528.0 104:242.0 105:369.0 106:33.0 107:114.0 108:2.0 111:74.0 112:37.0 113:132.0 114:995.0 115:146.0 116:600.0 117:2538.0 118:317.0 119:241.0 121:74.0 12	C00191	94715	1638	1546	868	898	1256	1616	1198	1027	1176	864	1222	892	1288	637	2646	1251.47	485.786			1133	1013	1193	1025	904	1351	1293	1004	1004	1279	981	1542	1143.5	190.428		0.913728	0.47557	glucuronic acid
octadecanol	755073	327	199219	85:709.0 86:41.0 87:506.0 88:67.0 89:1409.0 90:107.0 91:339.0 92:55.0 93:12.0 94:8.0 95:256.0 96:71.0 97:1942.0 98:200.0 99:345.0 100:46.0 101:691.0 102:29.0 103:1833.0 104:138.0 105:14.0 107:9.0 108:2.0 109:63.0 110:35.0 111:783.0 112:53.0 113:145.0 114:	D01924	8221	434	501	1991	1017	707	814	849	574	382	992	883	554	847	965	830	822.667	382.928			705	1059	898	626	1275	546	424	575	825	667	875	567	753.5	243.163		0.915924	0.591874	octadecanol
200624	421877	373	200624	87:6.0 88:3.0 89:18.0 90:25.0 91:453.0 93:16.0 97:32.0 98:1.0 99:10.0 100:35.0 101:27.0 103:496.0 105:57.0 106:32.0 107:192.0 108:61.0 110:233.0 111:13.0 112:18.0 113:19.0 115:37.0 116:44.0 117:81.0 119:6.0 121:4.0 122:3.0 123:2.0 126:62.0 127:63.0 129:7.			2671	1067	4035	723	2402	3429	2380	2064	1207	2093	1959	1329	1940	1427	3180	2127.07	926.452			1637	1586	1808	2371	2188	2032	1140	1049	2993	2942	2092	1548	1948.83	618.856		0.916207	0.572984	200624
isothreonic acid	489846	292	200467	85:155.0 86:70.0 89:322.0 90:41.0 91:85.0 92:73.0 93:234.0 96:28.0 98:28.0 99:31.0 101:76.0 102:1447.0 103:1824.0 104:203.0 105:115.0 106:38.0 108:13.0 110:10.0 112:44.0 113:75.0 114:25.0 116:110.0 117:2303.0 118:235.0 119:183.0 120:24.0 126:17.0 127:15.0	n/a	151152	2670	2043	879	1720	2416	1898	1588	2012	1953	1688	2234	1695	1499	1469	2926	1912.67	511.476			1440	1643	1639	1825	1776	1844	1698	1880	1567	2191	1491	2055	1754.08	222.074		0.917088	0.327657	isothreonic acid
216428	505415	223	216428	85:214.0 86:24.0 91:566.0 92:31.0 93:250.0 94:32.0 95:117.0 97:120.0 99:28.0 100:19.0 101:44.0 102:7.0 103:130.0 105:468.0 106:28.0 107:263.0 108:40.0 109:139.0 110:14.0 111:23.0 112:11.0 115:161.0 117:1974.0 118:167.0 119:169.0 121:97.0 122:2.0 123:294.0			6368	4285	19565	4919	4072	3831	3205	5220	4225	5101	5113	5310	4688	8090	7600	6106.13	3953.29			6390	7621	6575	1794	8416	6444	5925	4202	3973	2930	8372	4571	5601.08	2118.44		0.917288	0.693892	216428
240432	1100168	295	240432	87:64.0 88:144.0 89:121.0 96:218.0 103:592.0 109:35.0 115:176.0 116:43.0 117:456.0 118:199.0 119:27.0 125:56.0 133:1197.0 135:213.0 145:797.0 147:18642.0 148:2181.0 149:844.0 150:9.0 151:18.0 154:57.0 159:6.0 163:350.0 164:55.0 177:429.0 178:103.0 179:475			243	245	651	427	200	145	235	136	303	326	459	429	545	329	404	338.467	147.077			418	325	329	202	177	286	222	321	268	280	633	279	311.667	119.835		0.920819	0.614745	240432
354038	319018	178	354038	91:59.0 93:49.0 100:45.0 104:86.0 109:71.0 118:312.0 119:13.0 120:192.0 126:31.0 127:296.0 130:159.0 134:30.0 144:25.0 146:7.0 149:69.0 150:22.0 158:4.0 176:24.0 178:2194.0 179:310.0 180:19.0 184:25.0 193:379.0 194:15.0 247:18.0 492:2.0			515	709	1667	556	412	533	482	378	876	534	555	617	794	627	763	667.867	309.523			746	565	520	420	513	732	755	612	666	553	747	551	615	112.16		0.920842	0.579735	354038
350532	422917	239	350532	85:817.0 86:1435.0 87:535.0 88:309.0 89:1094.0 90:137.0 91:941.0 92:31.0 95:14.0 97:248.0 98:148.0 99:266.0 100:1740.0 101:2001.0 102:1055.0 103:30766.0 104:2847.0 105:2059.0 106:36.0 107:990.0 108:88.0 109:158.0 110:600.0 111:39.0 112:1471.0 113:1146.0 1			136	247	567	282	232	260	197	140	247	224	130	309	287	226	483	264.467	119.974			306	257	137	206	289	288	187	89	300	293	297	278	243.917	72.3897		0.922296	0.606853	350532
kynurenine	769271	218	226885	85:381.0 86:276.0 87:326.0 88:173.0 89:159.0 90:265.0 91:224.0 92:126.0 93:220.0 95:87.0 97:439.0 98:62.0 99:241.0 100:1416.0 101:803.0 102:339.0 103:354.0 104:68.0 105:39.0 107:271.0 108:20.0 110:191.0 111:212.0 112:77.0 113:49.0 114:138.0 115:199.0 116:	C00328	161166	150	392	845	376	232	541	491	564	557	637	607	717	571	584	548	520.8	176.213			736	599	421	301	576	262	227	391	572	324	730	626	480.417	181.033		0.922459	0.564034	kynurenine
300865	416458	156	300865	85:2339.0 86:4903.0 87:2536.0 88:3198.0 89:3107.0 90:1205.0 91:1873.0 92:1176.0 93:227.0 94:273.0 95:801.0 96:295.0 97:1647.0 98:917.0 99:7342.0 100:850.0 101:11575.0 102:1336.0 103:7060.0 104:1124.0 105:1313.0 106:338.0 107:1085.0 108:3271.0 109:466.0 11			484	546	2139	489	427	342	425	350	395	453	472	437	686	639	667	596.733	439.697			659	520	669	473	597	514	489	516	434	652	588	507	551.5	78.8433		0.924198	0.728864	300865
butylamine	240203	174	299715	86:8768.0 87:689.0 88:85.0 89:84.0 91:232.0 92:53.0 94:10.0 95:64.0 96:576.0 100:3802.0 101:440.0 102:640.0 103:149.0 104:47.0 105:31.0 106:6.0 107:1821.0 110:354.0 112:270.0 113:902.0 114:672.0 115:129.0 116:305.0 117:289.0 118:122.0 119:415.0 121:1.0 12		8007	5754	4565	3479	4269	5539	4603	3835	4945	5440	3789	4463	4874	5464	3713	4293	4601.67	725.542			4022	3962	4002	2885	3836	6383	5521	5406	3817	3025	5289	2922	4255.83	1138.71		0.924846	0.346291	butylamine
239966	806614	290	239966	90:30.0 91:32.0 94:18.0 100:206.0 103:3128.0 104:321.0 105:40.0 106:35.0 107:231.0 108:64.0 110:27.0 116:42.0 128:19.0 132:33.0 134:24.0 138:38.0 139:3.0 140:53.0 143:28.0 144:430.0 145:1.0 148:389.0 149:184.0 152:6.0 153:1.0 154:12.0 158:82.0 160:50.0 16			420	455	609	287	411	154	398	727	425	357	361	407	360	307	509	412.467	133.974			319	230	319	325	484	490	746	225	437	428	367	213	381.917	149.979		0.925933	0.581485	239966
palmitic acid	711066	313	227993	85:417.0 86:40.0 87:201.0 89:75.0 93:219.0 95:782.0 96:115.0 97:416.0 98:554.0 99:149.0 100:92.0 101:33.0 105:247.0 107:38.0 109:208.0 110:66.0 111:130.0 112:105.0 114:45.0 116:728.0 117:13594.0 118:1183.0 119:294.0 123:10.0 124:16.0 125:29.0 127:100.0 12	C00249	985	67523	41716	45008	50905	59279	65208	45413	35050	37297	37605	68974	47222	44928	55294	54614	50402.4	11079.9			39261	59055	59945	39654	53056	47771	42846	58462	41386	34942	50217	33859	46704.5	9398.04		0.926632	0.366153	palmitic acid
242417	374883	283	242417	86:1859.0 87:161.0 88:192.0 89:848.0 91:2082.0 92:210.0 93:397.0 94:28.0 97:144.0 99:66.0 100:2050.0 101:188.0 102:16.0 104:456.0 105:1180.0 107:9206.0 109:403.0 110:3146.0 111:502.0 112:304.0 114:1731.0 115:233.0 116:862.0 117:144.0 118:137.0 119:384.0 1			329	417	1542	642	518	335	435	460	352	329	419	458	564	615	1522	595.8	392.705			525	576	551	742	696	425	371	332	478	932	456	545	552.417	169.108		0.927185	0.724748	242417
erythronic acid lactone	407645	147	200446	85:524.0 86:107.0 87:1468.0 88:223.0 89:452.0 90:56.0 91:8.0 92:8.0 93:26.0 94:72.0 95:11.0 96:3.0 97:43.0 98:27.0 99:569.0 101:4055.0 102:1957.0 103:2624.0 104:300.0 105:186.0 106:23.0 107:26.0 108:20.0 110:18.0 111:111.0 112:67.0 113:331.0 114:26.0 115:	n/a	5325915	20052	21881	54326	13401	27099	26515	37409	25806	17135	24354	28017	19074	15123	17376	42190	25983.9	11126.7			17037	25418	12137	47290	12631	18708	20983	14194	31490	42942	13819	33195	24153.7	12056.6		0.929564	0.685796	erythronic acid lactone
213253	280269	86	213253	85:713.0 86:95162.0 87:8219.0 88:764.0 89:262.0 90:170.0 91:383.0 92:92.0 96:898.0 97:112.0 98:75.0 99:420.0 100:957.0 101:126.0 102:1170.0 103:4861.0 104:1481.0 105:545.0 106:132.0 110:13.0 111:23.0 113:16.0 114:187.0 115:110.0 116:111.0 117:583.0 118:29			97748	70171	48959	59055	78483	78170	52636	95076	92992	57008	114749	63788	81966	49162	97910	75858.2	20670.2			61953	65720	59144	52999	65280	103935	83224	89109	67500	59891	78816	58880	70537.6	15106.3		0.929861	0.462984	213253
phenol	219609	151	368045	86:867.0 88:893.0 90:3.0 91:3105.0 92:155.0 93:231.0 94:183.0 95:1228.0 100:752.0 101:358.0 102:24.0 105:58.0 106:316.0 107:6293.0 109:966.0 110:2380.0 111:552.0 113:90.0 114:483.0 115:1293.0 116:142.0 118:1092.0 119:170.0 120:91.0 121:52.0 122:197.0 123:	C00146	996	6090	1752	6718	2304	2197	2468	6619	2351	4565	2206	3749	2066	4021	2447	2609	3477.47	1741.39			2482	5255	4491	1499	2210	3475	2884	5685	3711	1864	3475	1777	3234	1373.85		0.929987	0.69596	phenol
pelargonic acid	399114	117	233458	85:1898.0 86:2486.0 87:420.0 88:662.0 89:459.0 90:399.0 93:381.0 95:334.0 97:1018.0 98:3601.0 99:1787.0 100:934.0 101:904.0 102:573.0 103:439.0 105:2489.0 106:106.0 110:1748.0 111:507.0 112:5139.0 113:948.0 114:202.0 115:338.0 116:2800.0 117:49159.0 118:4	C01601	8158	26589	37416	34624	45220	57264	36639	52828	30671	27555	25907	41362	24910	32799	35577	54333	37579.6	10608.8			29330	25325	23364	43926	49884	42401	29032	38714	27796	48306	37493	24025	34966.3	9639.61		0.93046	0.514077	pelargonic acid
271050	337877	157	271050	87:3.0 88:58.0 91:169.0 102:6.0 106:44.0 107:1016.0 108:64.0 109:116.0 110:937.0 113:135.0 115:4.0 120:669.0 121:119.0 122:61.0 123:50.0 129:2.0 130:1130.0 131:52.0 133:14.0 134:2545.0 135:387.0 138:265.0 142:51.0 143:78.0 151:2.0 157:5565.0 158:642.0 159			4533	2437	13913	6404	11075	10560	20863	4819	2786	6707	14510	2834	3243	12959	17886	9035.27	5969.36			3119	6953	4643	25075	7968	2262	2557	2149	10692	26037	3791	5701	8412.25	8410.35		0.931046	0.823746	271050
caprylic acid	343899	201	331346	85:1274.0 86:1172.0 89:83.0 90:215.0 93:310.0 94:5.0 95:175.0 97:664.0 98:797.0 99:1037.0 101:1302.0 105:1152.0 108:557.0 109:1592.0 110:689.0 111:168.0 116:2328.0 117:51908.0 118:4374.0 125:247.0 126:446.0 127:70.0 129:18046.0 130:3371.0 131:13510.0 132:	C06423	379	2672	2780	6981	4303	3735	3154	3099	3284	2045	2527	3406	2480	2472	4606	4867	3494.07	1270.82			2412	3215	2770	3668	5725	2530	3036	3204	2631	4359	2675	2828	3254.42	949.739		0.931412	0.592322	caprylic acid
222169	975088	144	222169	85:126.0 86:76.0 89:207.0 90:315.0 91:646.0 93:130.0 94:191.0 95:382.0 97:395.0 98:1885.0 99:66.0 100:141.0 101:97.0 108:218.0 111:44.0 112:111.0 113:1.0 115:1182.0 116:5333.0 117:456.0 118:104.0 120:99.0 121:117.0 122:334.0 124:78.0 125:530.0 127:293.0 1			798	912	1127	4336	9409	3674	1913	224	6334	3628	3571	840	1823	4156	926	2911.4	2511.77			632	4091	3962	3900	4994	831	1425	614	5227	2244	4068	614	2716.83	1828.81		0.933171	0.824145	222169
pseudo uridine	813829	217	213381	85:213.0 86:79.0 87:140.0 88:32.0 89:17.0 91:53.0 92:21.0 93:66.0 94:15.0 97:3.0 98:19.0 99:228.0 100:795.0 101:273.0 102:27.0 103:733.0 104:19.0 105:21.0 106:69.0 107:11.0 108:12.0 110:4.0 111:79.0 113:175.0 115:57.0 116:38.0 117:251.0 119:107.0 120:3.0	C02067	15047	5245	4360	2212	3240	3902	4280	4151	3671	4564	2692	3898	4739	3747	3036	3846	3838.87	796.701			3409	2724	3261	2192	3342	4898	4696	3394	4347	2641	3996	4134	3586.17	842.811		0.934173	0.432208	pseudo uridine
mannitol	665209	103	210512	87:53.0 88:13.0 89:235.0 90:5.0 91:1317.0 92:880.0 93:94.0 97:12.0 101:206.0 102:10.0 103:1703.0 104:117.0 105:44.0 113:10.0 115:13.0 116:26.0 117:949.0 118:40.0 119:26.0 121:2.0 127:13.0 129:770.0 130:38.0 131:241.0 132:7.0 133:424.0 134:66.0 135:4.0 138	C00392	6251	4208	8446	5782	6439	38389	9785	8160	6450	9658	7213	7911	1131	428	7902	9682	8772.27	8671.91			11024	6656	1877	6181	6466	7502	7627	6215	8694	6275	22808	7020	8195.42	5053.47		0.934242	0.84007	mannitol
268312	438220	114	268312	86:144.0 91:704.0 92:96.0 100:385.0 105:79.0 107:159.0 110:437.0 111:6.0 112:104.0 114:9694.0 118:80.0 120:1.0 127:165.0 130:230.0 132:317.0 134:529.0 136:285.0 139:141.0 141:34.0 143:52.0 146:137.0 153:59.0 156:333.0 160:35.0 170:14.0 184:106.0 186:38.0			2047	1896	3605	1388	1412	1200	2018	812	1724	1344	2294	1284	1554	1931	1843	1756.8	644.08			2562	1263	1388	940	1022	2203	1546	1845	1903	1156	2506	1443	1648.08	554.885		0.938117	0.647466	268312
226923	743658	290	226923	85:46.0 86:176.0 88:269.0 96:14.0 97:217.0 99:79.0 100:131.0 102:64.0 103:2532.0 104:40.0 114:74.0 116:537.0 117:736.0 124:53.0 125:65.0 126:81.0 130:440.0 132:21.0 143:89.0 144:768.0 146:24.0 157:19.0 158:293.0 160:478.0 171:12.0 172:54.0 173:17.0 174:29			3617	3213	978	674	1083	275	844	211	324	328	1045	767	435	423	4239	1230.4	1318.66			346	424	377	343	510	4925	2426	597	363	1989	484	1109	1157.75	1374.58		0.940954	0.890082	226923
citrulline	621606	157	323374	85:395.0 87:207.0 90:313.0 93:9.0 97:98.0 98:622.0 99:963.0 100:1296.0 101:335.0 102:62.0 103:183.0 107:346.0 110:124.0 112:10.0 113:117.0 114:292.0 115:433.0 116:106.0 117:4.0 125:46.0 126:143.0 127:675.0 128:351.0 129:144.0 130:1114.0 131:279.0 132:170.	C00327	9750	2915	2610	4857	3601	3623	3404	2565	4565	3196	4281	2465	4202	2801	4114	5509	3647.2	920.475			2594	4502	2974	5131	5295	3330	2686	2669	2875	3418	2244	3536	3437.83	1013.35		0.942595	0.579337	citrulline
223548	749189	294	223548	86:338.0 91:350.0 92:15.0 93:78.0 94:42.0 95:90.0 97:60.0 98:176.0 99:205.0 102:52.0 103:21.0 107:240.0 108:5.0 109:6.0 121:4.0 122:42.0 123:33.0 124:71.0 130:290.0 134:593.0 135:121.0 136:12.0 143:110.0 147:3414.0 148:161.0 151:12.0 156:22.0 160:1.0 165:			1096	336	716	399	492	620	590	605	733	346	645	587	617	515	635	595.467	184.117			447	497	527	370	693	568	453	777	556	465	888	498	561.583	150.954		0.943098	0.612006	223548
erythritol	471274	205	200514	85:484.0 86:98.0 87:344.0 88:306.0 89:1360.0 90:159.0 91:1305.0 92:413.0 93:938.0 94:98.0 95:309.0 96:42.0 97:75.0 98:38.0 99:347.0 100:100.0 101:2368.0 102:343.0 103:8246.0 104:765.0 105:496.0 106:52.0 107:192.0 108:40.0 110:104.0 111:112.0 112:29.0 113:	C00503	222285	3167	2120	1218	1859	3033	2507	1950	3843	2536	1470	2730	2430	1951	2046	3580	2429.33	744.167			2132	1844	2244	1854	2101	2512	2602	2293	2235	3060	2112	2515	2292	340.673		0.943469	0.560474	erythritol
phytol	761377	143	199184	85:619.0 86:43.0 89:53.0 90:10.0 91:137.0 93:107.0 94:130.0 95:1316.0 96:567.0 97:610.0 98:86.0 99:239.0 100:31.0 101:256.0 102:1.0 103:614.0 104:33.0 105:1.0 106:9.0 107:37.0 108:6.0 109:444.0 110:177.0 111:336.0 112:60.0 113:186.0 114:13.0 115:47.0 116:	C01389	9018	285	1172	1328	659	366	1069	404	434	841	652	971	1616	1384	513	1287	865.4	428.359			778	729	593	441	600	905	267	880	1118	532	1576	1384	816.917	385.123		0.943976	0.762588	phytol
295002	672353	178	295002	85:2377.0 86:102.0 87:1685.0 94:101.0 98:348.0 99:56.0 100:2740.0 101:105.0 102:188.0 104:2573.0 105:5374.0 106:437.0 110:164.0 111:339.0 112:1053.0 114:250.0 115:627.0 116:1598.0 118:660.0 125:10.0 128:245.0 130:1122.0 131:734.0 132:32.0 134:96.0 135:198			515	517	914	471	455	665	631	603	617	664	618	515	648	566	796	613	121.551			626	526	520	631	561	535	517	562	627	687	564	591	578.917	53.8794		0.944399	0.376464	295002
indole-3-acetate	685195	202	223508	95:19.0 98:116.0 100:105.0 126:1.0 129:23.0 130:236.0 136:12.0 142:3.0 144:36.0 145:18.0 149:1206.0 150:18.0 158:7.0 160:108.0 170:47.0 174:5.0 186:224.0 200:57.0 201:3.0 202:3534.0 203:211.0 217:42.0 219:91.0 230:11.0 248:17.0 258:5.0 259:11.0 262:17.0 2	C00954	802	3580	1831	1603	1200	2600	2405	2646	2108	4117	1848	3287	3341	3427	1695	3235	2594.87	869.384			2236	1064	2336	1632	1635	4135	1615	3423	2705	2870	2849	2952	2454.33	876.393		0.945842	0.681037	indole-3-acetate
204425	448206	350	204425	85:573.0 86:3940.0 87:7186.0 88:951.0 89:667.0 90:38.0 92:21.0 93:23.0 95:39.0 96:8.0 97:23.0 98:24.0 99:129.0 100:2533.0 101:2540.0 102:845.0 103:1656.0 104:185.0 105:894.0 106:90.0 107:99.0 108:11.0 109:4.0 112:44.0 113:304.0 114:146.0 115:1075.0 116:45			481	400	1245	713	482	420	760	573	483	405	650	847	601	524	1135	647.933	257.511			356	701	297	475	600	1098	633	673	492	495	326	1218	613.667	287.472		0.947114	0.74687	204425
319168	336739	157	319168	85:2776.0 86:2924.0 87:569.0 88:621.0 89:418.0 90:290.0 92:46.0 95:4.0 97:18.0 98:8549.0 99:3160.0 100:4995.0 103:28.0 104:402.0 105:35.0 106:1.0 113:1522.0 114:710.0 118:219.0 120:5147.0 121:979.0 122:176.0 124:1.0 125:7.0 127:24.0 128:6355.0 129:52.0 13			4277	2079	14537	6054	10469	10251	20272	4819	2963	6979	14219	2968	3481	12738	17145	8883.4	5809.65			3297	6791	5011	24577	7687	2262	2666	2345	11249	25584	3427	6132	8419	8217.57		0.947723	0.864841	319168
glucose	662738	160	200857	85:552.0 86:1690.0 87:1130.0 88:1743.0 89:41868.0 90:3571.0 91:6702.0 92:2870.0 93:219.0 94:168.0 95:6.0 96:2024.0 97:2772.0 98:844.0 99:1276.0 100:12833.0 101:8147.0 102:6006.0 103:135643.0 104:11966.0 105:13295.0 106:1923.0 107:762.0 108:175.0 110:356.0	C00031	107526	863681	859238	613950	774226	889024	861106	770472	779135	948511	783305	911516	764270	806175	630508	1082447	822504	117352			758900	689359	733451	665414	739937	953530	827546	815261	787834	837755	745252	807193	780119	76588.1		0.948468	0.291026	glucose
2-hydroxyvaleric acid	310750	131	218773	85:1140.0 86:325.0 87:79.0 88:41.0 89:349.0 90:12.0 94:13.0 95:1557.0 96:1414.0 97:153.0 98:157.0 99:228.0 100:481.0 101:220.0 103:65.0 105:6.0 106:3.0 107:100.0 110:2.0 111:68.0 112:145.0 113:440.0 114:198.0 115:2353.0 116:2204.0 117:816.0 118:74.0 119:6	n/a	98009	4047	3836	4720	3753	4104	3757	4134	3483	3838	4087	5586	2627	4038	3838	5861	4113.93	788.047			4065	4149	4719	4436	4528	4000	3049	4384	2720	3976	4054	2791	3905.92	678.332		0.949436	0.475744	2-hydroxyvaleric acid
199794	681176	361	199794	85:681.0 86:319.0 87:427.0 88:365.0 89:5211.0 90:455.0 91:548.0 92:74.0 93:47.0 94:60.0 95:82.0 96:148.0 97:213.0 98:132.0 99:488.0 100:978.0 101:1557.0 102:964.0 103:8073.0 104:888.0 105:983.0 106:119.0 107:79.0 108:43.0 109:226.0 110:222.0 111:331.0 112			15084	12863	5131	8397	10672	12317	9388	12906	14183	10914	11395	9619	11735	6586	11539	10848.6	2694.13			10698	8230	10230	6813	8929	14377	12528	12228	9925	8323	11001	10730	10334.3	2099.81		0.952596	0.592704	199794
2-hydroxyglutaric acid	507692	129	374016	85:1418.0 86:74.0 90:2.0 95:84.0 96:37.0 99:22.0 101:60.0 102:20.0 113:65.0 115:122.0 116:373.0 117:22.0 120:375.0 129:5247.0 130:672.0 131:332.0 132:33.0 133:891.0 134:84.0 135:30.0 147:2542.0 148:301.0 149:626.0 150:83.0 151:11.0 155:12.0 156:6.0 157:12	C02630	43	1224	730	1820	828	839	688	561	792	559	595	949	688	601	703	948	835	325.631			1075	753	624	519	837	1058	928	902	822	560	733	740	795.917	177.985		0.953194	0.712526	2-hydroxyglutaric acid
268313	315878	212	268313	85:294.0 86:277.0 90:192.0 91:10.0 93:305.0 94:178.0 98:773.0 99:271.0 100:427.0 104:13.0 106:61.0 107:1440.0 108:347.0 109:102.0 112:71.0 114:159.0 117:90.0 118:222.0 119:15.0 120:31.0 122:4969.0 123:507.0 124:614.0 125:7.0 127:156.0 128:119.0 130:1434.0			4910	6242	18214	6258	5062	4155	5456	4382	5804	5569	6270	5175	5616	7288	9306	6647.13	3434.33			7276	6622	6116	5950	7002	6800	5468	5483	6008	6639	7110	5614	6340.67	648.226		0.953895	0.76389	268313
199239	773115	211	199239	85:30.0 86:4.0 88:3.0 90:9.0 91:186.0 92:43.0 93:10.0 97:10.0 98:5.0 99:31.0 100:7.0 101:33.0 102:1.0 103:15.0 106:4.0 107:5.0 109:149.0 111:83.0 112:4.0 113:92.0 114:7.0 115:52.0 116:48.0 118:3.0 119:53.0 120:6.0 121:14.0 123:4.0 124:6.0 125:6.0 126:4.0			9024	13127	6696	6946	6065	6580	4832	7193	7162	5452	9094	11351	13071	10612	9382	8439.13	2642.64			10192	5156	5281	5015	8275	6476	11056	11471	6427	8888	9347	9024	8050.67	2317.46		0.953968	0.692232	199239
linoleic acid	777102	337	199240	85:539.0 86:198.0 87:84.0 88:115.0 89:404.0 90:26.0 91:2027.0 92:324.0 93:2910.0 94:2158.0 95:4815.0 96:2863.0 97:1449.0 98:363.0 99:311.0 100:44.0 101:132.0 102:9.0 103:8.0 104:66.0 105:910.0 106:291.0 107:1535.0 108:1155.0 109:1950.0 110:1406.0 111:542.	C01595	5280450	8751	4420	2318	4030	7605	5153	4808	3350	3592	2787	6061	6605	3701	4919	4063	4810.87	1787.38			2981	4669	6578	4510	3927	5468	5906	7255	3546	2088	5962	2195	4590.42	1694.01		0.954177	0.747264	linoleic acid
palmitoleic acid	706786	129	241426	85:771.0 86:267.0 89:478.0 91:447.0 92:212.0 93:1497.0 94:388.0 95:2807.0 96:3544.0 97:2277.0 98:3123.0 99:697.0 100:108.0 101:32.0 105:365.0 107:948.0 108:214.0 109:1421.0 110:1603.0 111:804.0 112:500.0 116:1428.0 117:14856.0 118:1232.0 119:646.0 120:77.	C08362	445638	16170	9947	4846	4198	12119	11871	10486	7913	8374	6454	10835	13341	10253	10486	12454	9983.13	3210.22			5541	4129	15215	12291	7619	15417	14058	12653	7373	6048	10277	4149	9564.17	4262.59		0.958033	0.773025	palmitoleic acid
2,3-dihydroxybutanoic acid	384445	292	238007	85:2076.0 86:2748.0 87:5901.0 88:406.0 89:806.0 90:135.0 91:588.0 93:221.0 94:278.0 95:38.0 97:12.0 100:1745.0 101:4603.0 102:49729.0 103:9323.0 104:2860.0 105:996.0 107:318.0 110:154.0 112:495.0 113:546.0 115:6402.0 116:363.0 117:108448.0 118:12198.0 119	n/a	13120900	559	677	480	378	408	580	598	671	623	446	357	504	584	509	1359	582.2	236.942			434	557	591	611	538	490	403	347	515	808	390	1020	558.667	190.42		0.959579	0.782455	2,3-dihydroxybutanoic acid
300920	350852	188	300920	85:512.0 86:3204.0 87:1.0 88:511.0 89:292.0 91:118.0 94:13.0 98:4.0 99:244.0 100:1166.0 101:1179.0 103:172.0 104:184.0 105:2.0 107:423.0 108:161.0 109:157.0 110:320.0 114:589.0 115:15.0 118:527.0 119:3.0 123:1.0 124:16.0 126:544.0 127:95.0 131:2.0 133:158			1629	2146	5854	2097	1670	1399	1937	1459	1780	1908	2044	1748	1974	2366	3609	2241.33	1126.33			2301	2214	2109	2295	2255	2134	1729	1801	2198	2329	2514	1936	2151.25	228.144		0.959808	0.78815	300920
methylhexadecanoic acid	750645	117	200398	85:187.0 86:54.0 89:175.0 90:1.0 91:361.0 92:175.0 93:183.0 94:2.0 95:381.0 96:39.0 97:330.0 98:279.0 99:150.0 101:110.0 102:6.0 103:220.0 104:21.0 105:252.0 106:25.0 107:46.0 109:123.0 111:229.0 112:81.0 113:22.0 115:43.0 116:481.0 117:7486.0 118:650.0 1	n/a	10465	8565	6710	9505	9239	7801	10183	6052	4766	4693	6087	8164	6699	6436	7760	8521	7412.07	1663.63			7052	9073	8826	5358	8152	5949	6051	8278	7056	5129	7852	6655	7119.25	1330.55		0.960495	0.624627	methylhexadecanoic acid
200906	565964	275	200906	85:383.0 86:723.0 87:233.0 88:194.0 89:6523.0 90:730.0 91:14.0 94:18.0 95:70.0 96:121.0 97:152.0 98:485.0 99:328.0 100:2993.0 101:817.0 102:2302.0 103:954.0 104:273.0 105:253.0 106:22.0 108:20.0 109:127.0 110:86.0 111:88.0 112:631.0 113:550.0 114:1178.0 1			1009	1378	1336	1332	995	1294	1616	1661	1616	1584	1069	770	753	1039	1520	1264.8	308.017			809	1273	1394	1434	1278	1359	1603	785	1174	1271	925	1277	1215.17	252.463		0.960758	0.656731	200906
ethanolamine	342787	174	213251	85:984.0 86:37354.0 87:4267.0 88:3374.0 89:1377.0 90:181.0 97:11.0 98:234.0 99:721.0 100:37001.0 101:4773.0 102:3509.0 103:3054.0 104:472.0 105:595.0 113:1061.0 114:4332.0 115:1470.0 116:6103.0 117:3990.0 118:984.0 119:1392.0 120:133.0 121:48.0 126:6.0 12	C00189	700	12945	9429	14552	9894	11203	9624	11319	6357	7377	8102	12377	8392	7259	10168	15254	10283.5	2659.08			8417	9738	7032	12671	8928	12089	10414	8395	10693	12386	9135	8748	9887.17	1786.68		0.961462	0.662431	ethanolamine
oleic acid	779154	339	215488	85:991.0 86:254.0 87:140.0 88:96.0 89:590.0 90:81.0 91:194.0 92:45.0 93:265.0 94:348.0 95:2577.0 96:4488.0 97:2961.0 98:3321.0 99:736.0 100:34.0 101:232.0 102:36.0 103:181.0 104:1.0 105:382.0 106:40.0 107:201.0 109:1411.0 110:1664.0 111:1158.0 112:547.0 1	C00712	445639	27887	14950	6951	12579	23089	21561	14723	12841	14461	10949	21963	20679	14623	16232	13984	16498.1	5453.72			10508	12931	25883	13725	13450	20344	20328	27347	12309	7440	19153	6958	15864.7	6699.15		0.961604	0.788549	oleic acid
210904	340549	259	210904	85:210.0 86:24.0 87:27.0 88:10.0 89:4.0 90:27.0 91:18.0 92:21.0 93:2.0 97:4.0 99:9.0 100:372.0 101:43.0 102:126.0 103:25.0 104:68.0 105:45.0 106:3.0 107:11.0 108:7.0 110:56.0 111:4.0 112:7.0 113:9.0 115:21.0 116:72.0 117:239.0 118:26.0 119:20.0 120:184.0			1724	816	2855	1574	1907	1342	1345	815	637	962	1335	769	733	2153	3226	1479.53	784.979			960	1300	966	2765	1194	1258	645	928	1989	2693	1210	1168	1423	688.406		0.96179	0.846051	210904
226844	641635	301	226844	85:346.0 86:3016.0 87:190.0 88:559.0 89:1199.0 95:28.0 97:362.0 98:1027.0 99:621.0 100:5019.0 101:2427.0 102:859.0 103:1956.0 105:367.0 108:5.0 109:282.0 110:309.0 112:214.0 113:353.0 114:371.0 116:1317.0 117:2249.0 118:242.0 121:53.0 122:29.0 124:7.0 125			2930	2739	2706	2902	4408	3484	5098	1650	1830	2194	4949	2184	2378	867	4741	3004	1283.42			1935	2055	1437	4372	1777	1946	2996	1710	5022	5472	2277	3684	2890.25	1403.52		0.962134	0.827986	226844
azelaic acid	610175	317	225382	85:15358.0 86:7124.0 87:4689.0 88:6613.0 89:10112.0 90:1230.0 91:11117.0 92:1386.0 93:28761.0 94:3062.0 95:7852.0 96:7553.0 97:36794.0 98:6395.0 99:11964.0 100:1001.0 101:11882.0 102:2116.0 103:5944.0 104:229.0 105:7786.0 106:1193.0 107:28194.0 108:3810.0	C08261	2266	204	253	963	216	228	355	237	202	232	269	287	303	347	342	546	332.267	195.387			323	386	343	272	398	276	182	437	369	326	230	295	319.75	73.3065		0.962329	0.835573	azelaic acid
367932	380080	170	367932	85:5005.0 86:824.0 88:890.0 89:3967.0 90:552.0 91:1145.0 92:159.0 99:553.0 100:1523.0 101:2170.0 103:1556.0 104:1506.0 105:423.0 109:1107.0 110:9992.0 111:1066.0 112:263.0 115:747.0 116:1914.0 117:899.0 118:916.0 119:1660.0 120:490.0 122:31.0 126:122.0 12			13174	15292	44075	16130	13574	11917	14349	11211	14737	14374	16012	13557	14484	18466	25754	17140.4	8190.35			17554	16835	15542	16796	17658	16893	13785	13565	16835	18534	18502	15634	16511.1	1615.7		0.963285	0.796118	367932
lathosterol	1095135	255	269290	85:1661.0 86:198.0 87:265.0 88:85.0 89:1625.0 90:195.0 91:25081.0 92:4410.0 93:15518.0 94:4159.0 95:20744.0 96:2605.0 97:3831.0 98:382.0 99:458.0 100:45.0 101:2392.0 102:388.0 103:1972.0 104:1210.0 105:23255.0 106:6154.0 107:18834.0 108:3827.0 109:8361.0	C01189	65728	243	457	632	273	206	282	246	196	323	301	241	366	263	427	263	314.6	115.195			233	228	218	182	405	348	603	283	296	289	337	225	303.917	113.896		0.966042	0.811791	lathosterol
cystine minor	797156	218	239859	86:35.0 90:2.0 92:58.0 100:1935.0 101:118.0 102:58.0 106:68.0 108:50.0 110:16.0 114:106.0 115:196.0 116:351.0 117:18.0 128:2.0 130:142.0 131:321.0 132:448.0 138:15.0 144:93.0 146:3657.0 147:1107.0 148:941.0 150:91.0 158:4.0 160:94.0 161:54.0 172:67.0 173:	C00491	67678	115	633	506	270	332	244	276	189	222	225	694	488	556	183	946	391.933	235.669			348	232	335	322	324	279	523	221	429	721	297	516	378.917	145.051		0.966789	0.868485	cystine minor
glutamine dehydrated minor	492789	155	212010	85:339.0 86:183.0 91:54.0 92:16.0 93:118.0 94:45.0 95:20.0 96:67.0 98:193.0 99:458.0 100:336.0 103:59.0 105:62.0 106:50.0 107:190.0 108:45.0 109:15.0 110:242.0 111:34.0 112:971.0 113:156.0 114:167.0 117:169.0 118:48.0 119:3.0 120:28.0 121:294.0 122:288.0	C00064	5961	22615	10680	24259	11660	23004	9274	13642	7298	8724	8736	9398	16440	13346	12761	18369	14013.7	5657.75			11939	9609	8976	8070	9511	31971	19047	12861	13387	9811	16240	11349	13564.2	6616.11		0.967926	0.850597	glutamine dehydrated 2TMS minor
206556	424318	85	206556	85:1141.0 86:63.0 89:5.0 91:2.0 92:6.0 93:3.0 94:2.0 95:1.0 96:9.0 97:73.0 98:90.0 99:246.0 100:723.0 101:183.0 102:33.0 103:12.0 105:3.0 110:7.0 111:18.0 112:56.0 113:66.0 114:34.0 115:34.0 116:39.0 117:57.0 118:2.0 119:3.0 120:1.0 122:3.0 123:1.0 124:5.			1013	1025	1858	1101	936	909	1244	438	1267	977	1572	940	525	1371	1983	1143.93	427.311			1250	1168	1031	728	1232	1241	1159	886	1156	1441	1082	922	1108	192.474		0.968588	0.789787	206556
359447	905449	159	359447	85:1413.0 86:104.0 91:361.0 95:504.0 96:6.0 97:1305.0 98:76.0 99:737.0 101:132.0 103:807.0 107:77.0 109:187.0 110:55.0 111:487.0 112:127.0 113:451.0 115:20.0 117:32.0 123:161.0 124:2.0 125:338.0 126:49.0 127:44.0 129:521.0 130:6.0 137:23.0 139:32.0 141:14			656	744	1016	547	571	772	701	594	571	324	729	407	482	647	887	643.2	177.646			968	458	588	273	664	629	584	487	834	543	532	918	623.167	199.53		0.968854	0.785015	359447
408701	551257	409	408701	85:108.0 88:58.0 89:973.0 90:239.0 91:32.0 93:85.0 94:37.0 95:197.0 96:3760.0 97:222.0 99:113.0 100:396.0 101:581.0 103:277.0 106:120.0 107:716.0 108:370.0 109:191.0 110:3164.0 111:126.0 112:93.0 114:28.0 116:187.0 117:809.0 118:62.0 119:163.0 120:220.0 1			978	1240	3708	1398	818	862	1086	857	1243	1201	1154	986	1184	1567	1737	1334.6	705.706			1546	1310	1252	1031	1259	1512	1041	1239	1319	1199	1537	1280	1293.75	170.393		0.969392	0.846736	408701
281148	783627	331	281148	85:510.0 86:913.0 87:51.0 88:1.0 89:86.0 92:17.0 95:1010.0 96:885.0 97:729.0 98:688.0 99:485.0 100:570.0 101:375.0 102:5.0 104:2.0 105:12.0 106:6.0 109:284.0 111:118.0 112:115.0 113:491.0 114:65.0 116:861.0 117:3831.0 119:217.0 122:5.0 123:271.0 124:277.0			884	232	659	477	209	430	314	131	268	220	313	345	341	218	1070	407.4	266.958			367	366	341	393	251	658	232	351	392	552	354	496	396.083	120.409		0.972222	0.893058	281148
myristic acid	634543	285	199929	85:416.0 86:210.0 87:140.0 88:111.0 89:675.0 90:120.0 92:132.0 93:183.0 94:22.0 95:657.0 96:62.0 97:455.0 98:384.0 99:309.0 100:253.0 101:342.0 102:103.0 103:393.0 104:2.0 105:426.0 106:30.0 107:104.0 108:4.0 109:155.0 110:23.0 111:174.0 112:80.0 113:55.0	C06424	11005	5726	4588	6220	5167	4535	4825	4061	3346	3383	3819	5390	5019	4590	5651	5452	4784.8	859.437			4519	5125	5471	4390	4487	4551	4460	6269	3749	3249	6064	3489	4651.92	943.877		0.972228	0.7055	myristic acid
isocitric acid	616685	245	199172	85:1950.0 86:384.0 87:1175.0 88:866.0 89:1001.0 90:198.0 91:1756.0 92:732.0 93:120.0 94:41.0 95:3489.0 96:330.0 97:844.0 98:411.0 99:2152.0 100:374.0 101:1560.0 102:905.0 103:1680.0 104:257.0 105:710.0 106:133.0 107:88.0 108:5.0 109:81.0 110:204.0 111:724	C00311	5318532	2223	1947	1146	1214	1431	1391	1335	1337	1190	1009	1615	1474	1420	980	1639	1423.4	333.732			1398	1096	1285	972	1126	1730	1841	1582	1677	933	1501	1468	1384.08	302.567		0.972378	0.753991	isocitric acid
glutaric acid	422031	158	219178	85:1297.0 86:112.0 87:117.0 88:469.0 89:303.0 90:65.0 95:46.0 97:2541.0 98:203.0 99:184.0 100:62.0 101:869.0 102:85.0 104:10.0 105:13.0 106:42.0 107:57.0 108:22.0 109:10.0 110:97.0 112:15.0 113:138.0 114:17.0 115:306.0 116:2026.0 117:782.0 118:9.0 119:108	C00489	743	209	277	643	335	269	272	319	223	248	262	365	239	291	294	450	313.067	109.502			273	391	275	419	325	248	177	343	335	400	217	253	304.667	76.3751		0.973169	0.82371	glutaric acid
2-deoxytetronic acid	390395	117	208880	85:361.0 87:117.0 90:11.0 91:88.0 92:103.0 95:18.0 96:12.0 97:4.0 99:46.0 101:131.0 102:959.0 103:234.0 104:90.0 105:278.0 106:2.0 108:7.0 109:5.0 112:1.0 113:23.0 115:104.0 116:48.0 117:2106.0 118:232.0 119:112.0 120:109.0 121:10.0 122:2.0 127:6.0 128:4.	n/a	150929	6454	3867	3011	3871	6882	5013	3734	3881	4520	3983	6366	2871	3021	3587	6530	4506.07	1395.99			3403	4034	5447	3249	4573	3101	4787	4996	5494	6412	3371	3766	4386.08	1064.93		0.973373	0.807952	2-deoxytetronic acid
tyrosine	670802	218	381469	86:117.0 91:15.0 92:34.0 98:39.0 100:1184.0 101:47.0 102:44.0 130:112.0 132:42.0 144:2.0 163:71.0 165:27.0 179:321.0 180:48.0 181:24.0 183:7.0 192:19.0 193:24.0 207:35.0 218:2929.0 219:549.0 220:248.0 267:29.0 280:207.0 281:83.0 354:13.0 380:5.0 497:9.0	C00082	6057	125842	120034	84493	119793	118141	193531	183199	178003	145010	183371	142945	112778	160770	123265	128496	141311	31865.9			127349	133001	140695	209432	136645	102768	129528	137174	129049	174397	115620	115275	137578	28578.2		0.973579	0.754283	tyrosine
propane-1,3-diol	214259	177	272666	147:136457.0 115:52492.0 130:38771.0 148:21374.0 133:14111.0 177:14086.0 131:12287.0 117:11965.0 103:11744.0 149:11695.0 101:10287.0 85:6165.0 116:5911.0 87:5534.0 205:3619.0 132:3181.0 99:2896.0 178:2292.0 119:1984.0 105:1584.0 134:1567.0 102:1527.0 118:	C02457	10442	1277	1065	2143	1302	1007	578	1219	704	1048	1269	282	1063	1481	1402	980	1121.33	427.536			1848	1258	1070	676	1151	1309	942	1255	814	689	1276	826	1092.83	332.561		0.974584	0.851343	propane-1,3-diol
235373	407853	258	235373	85:469.0 87:172.0 88:251.0 89:1073.0 91:425.0 92:674.0 93:200.0 94:1745.0 95:589.0 96:1132.0 97:410.0 98:504.0 99:2105.0 101:826.0 103:1897.0 104:24.0 105:309.0 107:1970.0 108:4329.0 109:677.0 110:8280.0 111:2751.0 112:347.0 113:292.0 114:813.0 115:1905.0			1989	2199	3308	2396	4229	2833	3564	1567	1196	1252	3546	1757	1505	3527	4704	2638.13	1122.45			1199	1675	1164	5012	2759	1181	2738	1119	3656	6773	1287	2384	2578.92	1789.97		0.977554	0.917114	235373
capric acid	451122	117	213517	85:16.0 86:49.0 89:92.0 90:2.0 92:9.0 93:4.0 95:59.0 97:1.0 98:26.0 99:2.0 100:5.0 102:2.0 103:186.0 104:8.0 105:10.0 107:1.0 111:8.0 112:4.0 114:2.0 116:30.0 117:1634.0 118:88.0 120:2.0 121:2.0 124:4.0 126:4.0 129:500.0 130:17.0 131:266.0 132:333.0 133:4	C01571	2969	9933	10898	9630	11251	10233	8189	5948	11179	6725	6363	9018	9243	7831	12395	9193	9201.93	1902.71			7079	7540	8221	10720	12907	8918	9627	10641	6009	10557	8768	7018	9000.42	1979.37		0.978101	0.790408	capric acid
236890	628019	217	236890	85:385.0 87:246.0 88:193.0 89:5272.0 90:307.0 91:499.0 93:570.0 94:323.0 98:1194.0 99:318.0 100:1950.0 101:1353.0 102:375.0 103:47613.0 104:4318.0 105:2249.0 106:100.0 107:265.0 110:4.0 111:214.0 112:46.0 113:414.0 114:1114.0 115:414.0 116:346.0 117:6041.			1343	3006	2394	977	1610	3683	1810	2569	4547	2463	2631	2227	2794	4703	5228	2799	1251.34			2045	4119	2840	961	4093	2864	1239	3332	2686	830	5864	2047	2743.33	1474		0.980112	0.916298	236890
217882	357863	140	217882	86:199.0 87:29.0 88:563.0 89:91.0 90:1078.0 91:16.0 95:15.0 97:377.0 98:1.0 100:30.0 101:41.0 103:253.0 104:32.0 108:10.0 110:1972.0 111:160.0 112:414.0 114:253.0 115:717.0 116:359.0 117:1223.0 118:128.0 123:16.0 126:1.0 128:1725.0 129:325.0 130:1302.0 13			1189	1532	4096	1551	1325	1123	1389	1217	1362	1306	1301	1283	1234	1794	2672	1624.93	781.242			1879	1440	1577	1580	1816	1642	1168	1377	1812	1784	1572	1471	1593.17	209.937		0.98045	0.892536	217882
UDP-glucuronic acid	586393	217	328006	85:1326.0 86:565.0 87:210.0 88:117.0 89:1464.0 90:212.0 94:105.0 95:166.0 96:251.0 97:477.0 98:285.0 99:1693.0 100:298.0 101:6507.0 102:696.0 103:5000.0 104:546.0 105:546.0 107:131.0 110:17.0 111:1417.0 112:176.0 113:3075.0 114:428.0 115:1454.0 116:5127.0	C00167	17473	225	311	807	392	205	346	271	408	332	194	316	218	256	307	291	325.267	147.995			284	281	220	243	304	435	580	231	216	313	394	329	319.167	106.242		0.981246	0.905456	UDP-glucuronic acid
270003	736904	217	270003	85:285.0 86:190.0 87:108.0 89:1156.0 90:261.0 91:205.0 92:208.0 93:119.0 98:490.0 100:51.0 101:119.0 103:4850.0 105:775.0 107:1420.0 109:203.0 111:491.0 114:565.0 115:35.0 116:106.0 117:2963.0 118:968.0 120:17.0 122:251.0 123:8.0 124:158.0 125:71.0 128:21			1157	1446	1176	1197	993	1786	1118	1678	1933	1652	1318	1478	1698	1581	2187	1493.2	337.538			1218	1200	2056	883	1309	2018	1291	1745	1488	1119	1814	1474	1467.92	369.285		0.983068	0.854309	270003
356938	895137	247	356938	85:704.0 86:17.0 88:21.0 89:108.0 91:875.0 93:68.0 94:2.0 95:23.0 96:80.0 99:210.0 103:85.0 105:616.0 106:37.0 107:156.0 112:30.0 114:17.0 115:383.0 116:138.0 117:268.0 118:66.0 119:852.0 120:26.0 121:198.0 122:8.0 123:7.0 124:17.0 125:54.0 126:32.0 127:1			88	114	2489	1015	720	755	98	509	158	862	138	932	1127	1337	598	729.333	637.813			1170	1116	910	284	935	129	125	801	908	454	1108	682	718.5	381.345		0.985146	0.959114	356938
2-deoxyerythritol	422939	103	211437	90:1.0 96:2.0 103:459.0 104:24.0 105:7.0 119:1.0 129:37.0 131:8.0 133:28.0 147:102.0 148:2.0 149:1.0 155:1.0 156:1.0 189:4.0 203:2.0 208:1.0 219:46.0 220:5.0 221:2.0 225:1.0 236:1.0 245:1.0 258:2.0 291:1.0 297:1.0 306:2.0 333:1.0 335:2.0 336:1.0 345:2.0 3	n/a	18302	2619	2124	2276	1570	3112	2096	1814	2168	1578	1488	2173	1661	1242	1418	3315	2043.6	607.528			1761	1906	1814	2114	2238	1895	1901	1643	2089	2359	2136	2359	2017.92	233.315		0.987432	0.891282	2-deoxyerythritol
271416	593932	197	271416	86:87.0 89:378.0 90:155.0 91:328.0 98:4.0 99:213.0 106:147.0 112:75.0 115:785.0 125:65.0 126:323.0 127:499.0 128:818.0 129:346.0 139:250.0 140:23.0 141:1495.0 142:31.0 150:60.0 151:384.0 152:1218.0 153:2268.0 154:836.0 155:4489.0 156:508.0 163:2.0 165:105			1396	742	1340	427	987	444	1046	779	662	819	1288	365	872	400	904	831.4	340.163			782	707	635	547	1079	1660	795	764	411	1091	627	762	821.667	327.624		0.988293	0.940744	271416
isoleucine	356931	158	205110	85:49.0 86:134.0 87:42.0 88:7.0 89:12.0 90:37.0 91:29.0 92:81.0 93:25.0 94:7.0 96:11.0 97:10.0 98:12.0 99:3.0 100:344.0 101:43.0 102:92.0 103:69.0 104:1.0 106:15.0 107:24.0 108:22.0 109:1.0 110:6.0 114:32.0 115:17.0 116:16.0 117:25.0 118:7.0 119:12.0 120:	C00407	6306	115570	84977	67935	78664	84842	113598	112794	117640	104413	103478	93634	78316	79063	82867	128126	96394.5	18344.5			86457	93899	94698	127330	90463	104677	90942	75105	90599	124888	83201	82887	95428.8	16074.9		0.989982	0.887096	isoleucine
199773	755246	215	199773	85:1040.0 86:1525.0 87:495.0 88:1118.0 89:601.0 90:119.0 91:29.0 92:36.0 93:248.0 94:64.0 95:649.0 96:581.0 97:10553.0 98:3677.0 99:531.0 100:1134.0 101:1172.0 102:728.0 103:3148.0 104:469.0 105:156.0 106:16.0 107:108.0 108:59.0 109:327.0 110:64.0 111:128			82372	57694	34102	14085	20602	37686	40781	42382	65886	66437	48684	42654	64438	29576	58131	47034	18797.2			16912	26229	38861	32353	31249	85176	65352	54706	60523	50723	43506	53651	46603.4	18998.7		0.990845	0.953526	199773
ornithine	594392	174	202826	86:13212.0 87:245.0 90:530.0 91:122.0 93:137.0 94:85.0 96:550.0 97:1449.0 98:891.0 100:7104.0 102:1238.0 107:126.0 108:272.0 109:138.0 110:261.0 112:603.0 114:1019.0 121:4.0 122:33.0 123:49.0 124:136.0 126:593.0 128:2118.0 130:345.0 136:46.0 137:37.0 138:	C00077	6262	2892	3231	1663	1082	3509	2541	3957	1515	3018	759	2515	3089	2931	1962	3180	2522.93	929.225			1102	1111	1719	1069	1282	5477	5566	3273	3161	2042	1920	2309	2502.58	1592.74		0.991934	0.967193	ornithine
aconitic acid	584220	229	308113	85:80.0 89:9.0 90:4.0 95:64.0 97:436.0 98:236.0 100:159.0 103:7.0 110:130.0 112:1.0 114:27.0 117:114.0 122:1.0 126:22.0 127:89.0 131:9.0 133:469.0 134:125.0 135:11.0 136:6.0 137:5.0 138:2.0 139:19.0 140:35.0 141:68.0 145:2.0 146:1.0 147:8324.0 148:959.0 1	C00417	309	183	701	491	228	214	175	188	214	289	180	336	191	565	197	328	298.667	162.218			238	181	205	219	244	384	677	231	255	323	419	190	297.167	141.226		0.994978	0.98005	aconitic acid
425498	257844	131	425498	85:275.0 86:164.0 87:2785.0 90:81.0 91:187.0 95:1047.0 96:40.0 97:55.0 98:7.0 99:319.0 101:363.0 107:430.0 108:235.0 109:238.0 110:367.0 115:1308.0 116:28.0 119:38.0 126:242.0 127:1859.0 128:4.0 129:353.0 130:1471.0 131:39466.0 132:4773.0 133:2654.0 134:8			93951	61785	157498	48412	94471	80291	45695	43608	60675	65955	67968	42805	38923	49589	73313	68329.3	30418			63316	55810	103639	54889	49696	51338	74034	104088	72975	81001	57797	49908	68207.6	19513.8		0.998219	0.990522	425498
inositol myo-	729867	305	199164	85:3012.0 86:683.0 87:4229.0 88:1173.0 89:2141.0 90:264.0 91:1051.0 92:435.0 93:343.0 94:183.0 95:507.0 96:215.0 97:761.0 98:556.0 99:3253.0 100:554.0 101:7623.0 102:2914.0 103:60634.0 104:6045.0 105:4298.0 106:438.0 107:409.0 108:109.0 109:1687.0 110:201	C00137	892	31882	29748	16444	25354	34943	33210	25465	31823	26781	17152	42085	33687	27028	24427	41681	29447.3	7437.42			25381	28157	25316	22824	28374	34300	30010	35652	34942	25330	30608	31860	29396.2	4231.18		0.998262	0.983259	inositol myo-
322652	594784	116	322652	86:39.0 87:716.0 88:636.0 89:367.0 91:78.0 99:90.0 100:49.0 101:2076.0 102:156.0 103:2933.0 104:270.0 105:69.0 107:11.0 108:42.0 110:1.0 115:88.0 116:3300.0 117:5963.0 118:733.0 119:180.0 120:29.0 121:2.0 126:75.0 128:171.0 129:34.0 130:295.0 131:32.0 133			1300	1056	4709	5046	1475	3908	1986	1090	2295	2419	1670	1487	2318	2108	2078	2329.67	1249.73			2448	2272	2129	2404	2567	2798	1551	1213	2683	3163	2515	2189	2327.67	527.897		0.999142	0.995915	322652
226864	691552	211	226864	85:209.0 86:248.0 87:71.0 90:170.0 95:765.0 98:18.0 99:83.0 100:555.0 101:224.0 102:70.0 103:575.0 107:197.0 109:151.0 110:148.0 111:51.0 113:189.0 122:11.0 123:1.0 126:8.0 128:127.0 129:159.0 130:83.0 138:131.0 140:69.0 141:47.0 142:122.0 145:202.0 146:2			1145	716	1328	717	1464	1008	1121	609	475	578	963	867	636	982	2628	1015.8	529.451			471	769	512	2167	896	635	853	479	1024	3070	467	837	1015	795.656		0.999212	0.997528	226864
aminomalonic acid	455266	218	240264	86:10873.0 87:1358.0 88:545.0 91:23.0 97:4.0 98:955.0 99:243.0 100:5490.0 101:1270.0 102:689.0 103:1074.0 104:3.0 105:2.0 107:266.0 110:2586.0 111:253.0 114:390.0 115:245.0 116:833.0 117:2473.0 118:364.0 119:19.0 123:127.0 127:1.0 129:573.0 130:2372.0 131	C00872	100714	11911	4902	3803	5396	8642	6586	9241	4131	4518	3609	8277	8427	4551	10902	8335	6882.07	2693.34			4830	6018	3449	10702	6867	6282	5108	3055	11995	12265	5906	6190	6888.92	3104.82		1.001	0.995152	aminomalonic acid
phenylalanine	538016	218	217642	85:372.0 86:1654.0 87:562.0 88:174.0 89:1170.0 90:620.0 91:14880.0 92:2198.0 93:379.0 94:39.0 95:111.0 96:36.0 97:147.0 98:179.0 99:132.0 100:14537.0 101:2108.0 102:1308.0 103:2054.0 104:513.0 105:614.0 106:68.0 107:170.0 108:5.0 109:25.0 110:22.0 111:4.0	C00079	6140	46736	38453	24959	35562	41327	47240	49535	56667	51527	43955	46761	32837	43706	28385	42894	42036.3	8688.8			40308	34406	40746	44801	45750	41207	41286	49136	40194	44629	47313	37263	42253.2	4222.71		1.00516	0.937556	phenylalanine
272694	486732	208	272694	87:24.0 88:2907.0 89:334.0 90:1313.0 91:592.0 92:175.0 93:189.0 94:203.0 95:235.0 96:145.0 97:675.0 100:1365.0 101:363.0 102:35.0 103:806.0 104:1510.0 105:293.0 106:8.0 107:1526.0 108:477.0 109:246.0 113:136.0 115:503.0 116:304.0 117:1387.0 118:249.0 120:			4496	5092	2463	3656	5291	2694	3306	6381	3424	2760	4160	4404	4866	5140	5795	4261.87	1187.54			3388	3050	2746	4872	5900	3702	4015	3555	4009	6257	5286	4652	4286	1115.94		1.00566	0.957462	272694
tryptophan	779834	202	199775	86:27.0 87:274.0 88:35.0 89:61.0 90:26.0 91:147.0 92:19.0 93:50.0 94:4.0 100:133.0 101:54.0 102:184.0 103:173.0 104:20.0 105:43.0 106:10.0 107:18.0 108:29.0 113:15.0 114:34.0 115:146.0 116:31.0 118:17.0 119:53.0 120:26.0 121:10.0 126:15.0 127:6.0 128:77.0	C00078	6305	28487	109627	56405	100109	88859	139769	103155	139947	158962	117859	118458	151343	179540	96112	111247	113325	38725.9			120704	99509	116898	73388	107641	65790	99601	152250	117320	111373	164095	142314	114240	29039.4		1.00807	0.946412	tryptophan
223675	281046	145	223675	86:5927.0 87:80.0 89:132.0 90:460.0 91:1879.0 92:158.0 93:269.0 94:2.0 96:239.0 97:16.0 99:269.0 101:286.0 102:631.0 103:695.0 105:174.0 106:13.0 107:332.0 108:72.0 109:42.0 110:356.0 113:771.0 115:289.0 116:240.0 117:2247.0 118:58.0 119:314.0 120:6.0 128			15201	11927	6049	14755	20151	15368	9867	9338	12364	11580	17728	8186	14164	11918	20652	13283.2	4184.9			10439	19676	14053	18228	7407	10488	16986	16616	8744	16232	11349	10533	13395.9	4063.3		1.00849	0.944406	223675
lauric acid	548310	117	374008	85:1022.0 86:901.0 87:290.0 88:175.0 89:525.0 90:119.0 91:114.0 93:338.0 94:40.0 95:1500.0 96:81.0 97:736.0 98:813.0 99:234.0 100:766.0 101:608.0 102:158.0 103:148.0 105:926.0 107:170.0 109:402.0 111:508.0 112:651.0 113:188.0 114:160.0 115:324.0 116:3272.	C02679	3893	28284	41324	39938	35730	36566	25835	27425	26970	27946	27368	36389	37960	32541	42665	33873	33387.6	5757.57			27317	34645	31961	25787	32264	45675	31058	36518	25853	30114	40666	42327	33682.1	6502.03		1.00882	0.901741	lauric acid
241087	739222	353	241087	86:1714.0 93:2740.0 94:3876.0 98:988.0 99:6683.0 100:6141.0 101:362.0 102:425.0 104:158.0 106:48839.0 107:15383.0 108:4053.0 113:61181.0 114:6241.0 115:1000.0 118:1469.0 120:12102.0 124:4089.0 126:453.0 132:727.0 133:1792.0 134:6222.0 136:114.0 140:1286.0			803	1379	537	324	174	406	173	921	1271	808	240	1276	1096	252	433	672.867	433.27			1074	385	875	162	383	1351	1056	835	412	280	451	885	679.083	378.843		1.00924	0.969098	241087
glycerol-alpha-phosphate	591357	299	199419	86:22.0 87:270.0 88:110.0 89:3183.0 90:182.0 94:18.0 96:23.0 98:14.0 99:83.0 100:94.0 101:5380.0 102:534.0 103:3676.0 104:328.0 105:126.0 107:12.0 109:25.0 110:100.0 112:37.0 113:573.0 114:120.0 115:730.0 116:1500.0 117:1052.0 118:144.0 119:293.0 120:18.0	C00093	754	1009	912	856	600	853	908	709	721	748	748	873	768	1072	670	1304	850.067	178.769			768	851	683	606	918	959	705	1038	907	832	790	1253	859.167	174.668		1.01071	0.895443	glycerol-alpha-phosphate
231850	878626	122	231850	85:10060.0 86:1385.0 90:204.0 91:6771.0 92:872.0 93:13489.0 94:14299.0 95:16475.0 96:31579.0 97:52830.0 98:15347.0 99:2276.0 100:918.0 101:100.0 105:2520.0 106:1628.0 107:6293.0 108:10909.0 109:7248.0 110:19597.0 111:18443.0 112:9468.0 113:1551.0 114:620.			339	211	1309	1070	1192	242	322	142	929	545	363	266	367	817	411	568.333	388.196			353	1055	668	639	1173	524	296	257	586	395	754	202	575.167	306.785		1.01202	0.960721	231850
citric acid	618455	273	372849	85:348.0 86:278.0 87:352.0 88:83.0 89:315.0 90:60.0 92:9.0 94:25.0 95:328.0 97:321.0 99:1403.0 100:223.0 101:579.0 102:249.0 103:268.0 104:36.0 105:73.0 110:40.0 111:744.0 113:228.0 114:66.0 115:1522.0 116:484.0 117:1187.0 118:169.0 119:277.0 120:19.0 124	C00158	311	160141	133217	46702	76572	85362	85905	71640	85844	56933	59466	108593	88340	66654	46835	100623	84855.1	31320.2			83816	74606	65522	71700	62529	100370	130692	97189	118745	59964	81275	87876	86190.3	22185		1.01574	0.901859	citric acid
levoglucosan	569799	204	199201	85:466.0 86:80.0 87:101.0 88:30.0 89:186.0 90:11.0 91:69.0 93:36.0 94:26.0 95:59.0 96:110.0 97:529.0 98:179.0 99:235.0 100:83.0 101:784.0 102:50.0 103:1304.0 104:116.0 105:98.0 107:28.0 108:28.0 109:81.0 110:142.0 111:297.0 112:66.0 113:414.0 114:113.0 11	n/a	2724705	647	510	1332	591	436	1103	381	1278	593	370	611	270	359	806	676	664.2	331.684			553	788	319	346	1072	1185	775	461	318	497	888	900	675.167	300.191		1.01651	0.929803	levoglucosan
232087	616681	273	232087	85:1033.0 86:2726.0 87:1345.0 88:1502.0 89:740.0 90:89.0 91:176.0 93:816.0 94:1827.0 95:1180.0 96:3522.0 97:947.0 98:5608.0 99:1901.0 100:6972.0 101:1316.0 102:825.0 103:3755.0 106:115.0 107:183.0 108:1647.0 109:799.0 110:2744.0 111:1119.0 112:1263.0 113:			160241	133081	46356	76397	85447	85802	71557	85934	56810	59567	107698	88447	66772	46700	100875	84778.9	31329.8			83687	74472	65424	72609	62792	101327	130782	97306	118854	59818	81120	88001	86349.3	22236.2		1.01852	0.88479	232087
xylose	542808	103	200500	85:565.0 86:845.0 87:790.0 88:535.0 89:6861.0 90:592.0 91:618.0 92:229.0 93:81.0 94:131.0 95:82.0 96:74.0 97:71.0 98:285.0 99:592.0 100:1939.0 101:2517.0 102:1082.0 103:47280.0 104:4533.0 105:4103.0 106:317.0 107:207.0 108:45.0 109:43.0 110:128.0 111:241.	C00181	6027	1821	2447	2379	1424	1362	1841	1150	2089	2627	1517	1580	1804	1758	1151	1913	1790.87	450.565			1527	1573	1845	1616	1885	2626	2113	1612	1931	1728	1766	1763	1832.08	301.1		1.02301	0.78819	xylose
2-hydroxybutanoic acid	258175	131	199800	85:149.0 86:7.0 87:71.0 88:31.0 89:19.0 91:405.0 92:19.0 93:2.0 95:123.0 97:12.0 99:46.0 100:6.0 101:97.0 103:112.0 104:25.0 105:164.0 106:3.0 107:19.0 108:4.0 109:27.0 110:14.0 112:2.0 115:201.0 116:35.0 117:111.0 118:6.0 119:642.0 120:29.0 121:1.0 123:2	C05984	94318	97104	64215	.	77954	97406	82134	47520	43074	62678	65076	79083	34354	37058	89007	69665	67594.9	21043.2			63580	56928	102755	74627	49696	47743	75142	106049	66421	81001	56085	49908	69161.2	19685.5		1.02317	0.847131	2-hydroxybutanoic acid
glycolic acid	229810	177	216047	85:1.0 87:58.0 88:215.0 89:62.0 90:2.0 94:14.0 95:19.0 96:7.0 97:4.0 100:9.0 101:33.0 102:23.0 103:534.0 104:4.0 105:16.0 106:3.0 107:9.0 108:3.0 112:2.0 113:51.0 115:32.0 117:473.0 118:1.0 119:31.0 122:1.0 126:1.0 131:388.0 132:83.0 133:816.0 134:40.0 13	C00160	757	3824	2108	5006	3769	2707	2412	2474	1984	1909	3548	2574	2557	569	2660	2541	2709.47	1023.61			2858	3168	2409	2087	3017	3164	2561	2950	2757	2153	3119	3087	2777.5	388.208		1.02511	0.829684	glycolic acid
408490	968624	185	408490	85:164.0 91:37.0 97:115.0 98:305.0 99:37.0 112:520.0 113:88.0 115:1.0 125:40.0 138:25.0 139:155.0 142:4.0 143:109.0 158:1.0 185:1285.0 186:155.0 207:190.0 208:161.0 209:12.0 281:75.0 282:13.0 283:11.0 284:8.0 342:24.0 356:14.0			122	152	12032	4504	2661	3993	129	2617	212	3472	141	3968	4566	4715	3443	3115.13	3073.17			4885	3973	3544	1521	3922	154	135	3921	4488	2180	4937	4672	3194.33	1757.34		1.02542	0.937415	408490
226858	356536	241	226858	85:929.0 86:565.0 88:7803.0 89:24.0 90:265.0 91:162.0 93:726.0 94:383.0 95:559.0 97:603.0 98:1780.0 99:4460.0 100:555.0 101:737.0 102:690.0 104:908.0 106:6.0 108:27.0 109:292.0 110:857.0 111:465.0 112:527.0 113:2786.0 114:1303.0 115:892.0 119:44.0 120:28.			4713	4886	5394	3817	8242	6541	7216	3369	2371	2230	7200	3829	3421	6741	11937	5460.47	2582.47			2388	3191	1733	12613	4976	2470	5380	2327	7358	15943	2892	6017	5607.33	4459.7		1.0269	0.915394	226858
ribitol	575953	319	322007	85:335.0 86:850.0 87:356.0 88:770.0 89:3116.0 90:99.0 91:184.0 92:204.0 94:67.0 95:98.0 96:28.0 97:155.0 98:257.0 99:227.0 101:2028.0 102:60.0 103:36383.0 104:3434.0 105:799.0 108:71.0 109:14.0 110:83.0 111:386.0 113:1168.0 114:1114.0 115:485.0 116:1192.0	C00474	827	379	240	453	227	350	426	312	171	190	203	327	270	338	202	620	313.867	121.726			270	323	287	482	247	185	197	539	370	229	297	443	322.417	113.96		1.02724	0.85356	ribitol
285340	454255	160	285340	85:61.0 86:5630.0 87:2218.0 88:3024.0 89:1849.0 91:238.0 94:873.0 95:25.0 96:2523.0 98:124.0 99:218.0 100:3733.0 101:2254.0 102:10605.0 103:19088.0 104:1991.0 105:344.0 106:70.0 107:125.0 108:203.0 111:114.0 112:627.0 113:1251.0 114:1000.0 115:1081.0 116:			59540	69190	102262	21560	31769	34751	36722	34745	68770	57474	53378	50133	78406	38632	77098	54295.3	22017.2			23941	37647	40975	25520	45554	51966	79199	66401	85029	48630	76545	89508	55909.6	22829.3		1.02973	0.85375	285340
methanolphosphate	293419	241	331012	86:461.0 98:116.0 110:85.0 114:56.0 118:39.0 121:49.0 127:467.0 130:1427.0 135:136.0 136:32.0 137:19.0 151:34.0 152:64.0 156:29.0 163:633.0 164:138.0 175:683.0 180:8.0 181:11.0 182:7.0 184:16.0 185:201.0 186:2.0 187:191.0 190:17.0 195:116.0 201:1.0 211:40	n/a	13130	117	2864	860	180	118	126	1913	107	149	164	1627	158	197	217	300	606.467	848.068			273	185	195	218	192	2228	3260	119	203	193	292	144	625.167	1014.95		1.03083	0.958795	methanolphosphate
succinic acid	370518	247	199210	85:668.0 86:529.0 87:317.0 88:94.0 89:164.0 90:25.0 91:33.0 92:73.0 93:121.0 94:10.0 95:40.0 96:19.0 97:39.0 98:6.0 99:154.0 100:48.0 101:331.0 102:52.0 103:140.0 104:19.0 105:108.0 106:28.0 107:63.0 108:6.0 109:1.0 110:18.0 111:15.0 112:12.0 113:291.0 11	C00042	1110	2541	2185	3178	2889	2515	2125	2375	2543	1755	1965	2359	1761	1432	1807	4635	2404.33	770.867			2359	2955	1775	3193	2677	2234	2078	1887	2970	3033	1837	2745	2478.58	512.374		1.03088	0.776981	succinic acid
glycocyamine	511031	171	368038	86:55.0 87:1.0 88:634.0 89:716.0 90:334.0 91:816.0 97:219.0 98:371.0 99:633.0 100:3565.0 102:163.0 103:161.0 106:1008.0 109:867.0 110:1552.0 111:634.0 112:135.0 114:499.0 115:1885.0 120:141.0 128:129.0 129:243.0 132:373.0 139:218.0 140:11.0 141:724.0 142:			196	190	567	290	225	527	353	255	285	322	243	241	232	361	591	325.2	132.889			229	324	347	469	290	256	165	288	459	460	304	437	335.667	100.541		1.03219	0.823269	glycocyamine
indole-3-lactate	764543	202	223518	98:163.0 100:2.0 110:5.0 114:3.0 116:31.0 117:51.0 129:157.0 144:38.0 169:17.0 170:17.0 171:45.0 197:49.0 202:1980.0 203:219.0 204:144.0 217:86.0 228:9.0 231:14.0 235:14.0 241:11.0 253:13.0 267:1.0 274:10.0 276:3.0 282:17.0 286:2.0 307:11.0 310:1.0 318:12	C02043	92904	1998	1677	1412	1235	1382	1644	1347	2004	3196	1423	1805	1945	2823	1507	2015	1827.53	550.922			1749	1421	1833	1055	1464	2709	1824	2622	1939	1712	2326	2094	1895.67	485.999		1.03728	0.739569	indole-3-lactate
shikimic acid	610984	204	199162	85:1162.0 86:478.0 87:1218.0 88:414.0 89:1021.0 90:292.0 91:3300.0 92:1229.0 93:4667.0 94:930.0 95:1827.0 96:1036.0 97:887.0 98:374.0 99:1182.0 100:281.0 101:4115.0 102:1146.0 103:5700.0 104:661.0 105:3643.0 106:494.0 107:635.0 108:312.0 109:1410.0 110:30	C00493	8742	468	1976	6551	1399	1289	4194	2165	2426	4041	2314	2171	1492	2211	7714	5885	3086.4	2131.12			2034	4762	3478	2290	4790	3017	471	4567	3532	1660	6150	1686	3203.08	1653.07		1.03781	0.877545	shikimic acid
leucine	346072	158	232325	85:34512.0 86:149407.0 87:41792.0 88:23086.0 89:13601.0 90:4836.0 91:2533.0 92:1249.0 93:1251.0 94:8767.0 95:5569.0 96:19664.0 97:16211.0 98:33287.0 99:57259.0 100:617018.0 101:90578.0 102:1134578.0 103:183427.0 104:49957.0 105:28416.0 106:2960.0 108:364.	C00123	6106	115007	111435	68167	124898	102781	143861	171625	163221	119095	151272	146253	77443	99146	105436	208891	127235	37273.5			130684	126352	133177	227173	138544	80939	112042	102465	113532	206838	94796	118039	132048	43206.1		1.03783	0.758576	leucine
glycerol	343749	205	207507	85:458.0 87:445.0 88:273.0 89:1241.0 90:117.0 91:85.0 93:120.0 94:8.0 95:48.0 98:24.0 99:99.0 101:1759.0 102:189.0 103:6906.0 104:735.0 105:547.0 106:86.0 107:18.0 108:34.0 109:13.0 110:10.0 111:37.0 112:45.0 113:209.0 115:479.0 116:604.0 117:7660.0 118:9	C00116	753	95748	65406	42580	62594	71562	72694	67429	65589	41437	43457	91856	121463	54589	73834	104114	71623.5	23221.7			33381	66986	73393	136467	50663	97084	83084	109038	59293	54138	91412	37255	74349.5	30528.6		1.03806	0.794118	glycerol
3-hydroxybutanoic acid	278651	191	267654	85:4685.0 86:2140.0 87:2432.0 88:1906.0 89:1713.0 90:818.0 94:6509.0 95:1977.0 96:343.0 97:582.0 98:972.0 99:6058.0 100:13.0 101:5789.0 102:1585.0 103:41828.0 104:3656.0 105:3410.0 107:3911.0 109:2903.0 110:448.0 112:53.0 113:1224.0 114:63.0 115:15601.0 1			35310	18644	23551	14967	112921	31485	19656	13554	31526	19535	23529	13472	13734	20065	23201	27676.7	24547			12783	17254	40258	44253	10385	45030	43926	20063	45036	14043	23560	28323	28742.8	14066.8		1.03852	0.89478	3-hydroxybutanoic acid
urea	330851	171	367910	85:603.0 86:873.0 87:635.0 89:373.0 91:445.0 92:11.0 95:116.0 98:531.0 99:6622.0 100:3551.0 101:601.0 102:838.0 104:472.0 106:791.0 109:168.0 110:2207.0 111:1050.0 112:91.0 113:430.0 114:1095.0 115:828.0 116:482.0 117:301.0 118:1057.0 120:720.0 121:38.0 1			797604	1020853	1432812	1265467	892431	538973	961714	632742	1110935	809678	1114211	916769	872949	1309382	229299	927055	311010			1057345	1054620	940717	885761	986594	1021686	924567	762677	916618	907385	1154459	945949	963198	100705		1.03899	0.703191	urea
201042	298036	132	201042	86:79.0 87:6.0 88:13.0 89:425.0 90:29.0 91:59.0 93:7.0 94:1.0 95:6.0 96:12.0 98:11.0 99:8.0 100:16.0 101:8.0 102:25.0 103:43.0 104:160.0 105:3.0 107:1.0 109:3.0 111:5.0 112:2.0 113:18.0 114:2.0 115:25.0 116:79.0 117:2.0 118:1.0 123:6.0 124:1.0 125:1.0 128			1171	1911	5135	1949	1349	3546	1749	2578	1770	1162	1429	2210	2140	1884	4622	2307	1205.83			2336	1920	1966	2597	2115	1430	1167	1803	3736	3530	2841	3382	2401.92	830.172		1.04114	0.818556	201042
419273	372535	117	419273	85:1.0 86:224.0 87:232.0 88:193.0 89:156.0 90:238.0 91:417.0 92:3.0 94:1.0 95:44.0 98:5.0 99:25.0 100:385.0 101:470.0 102:397.0 104:449.0 105:322.0 106:34.0 107:847.0 108:5.0 110:284.0 114:547.0 115:136.0 116:72.0 117:15609.0 118:1601.0 119:678.0 120:307.			1663	1912	2459	1128	2153	1999	1976	2781	713	1343	1562	1782	1227	1251	4469	1894.53	892.082			833	1173	1477	3572	1422	2775	1290	973	3218	2837	1176	3121	1988.92	1018.12		1.04982	0.799565	419273
228528	629517	244	228528	85:4983.0 86:2525.0 87:2940.0 88:1156.0 89:58247.0 90:4805.0 91:3400.0 92:358.0 93:898.0 94:226.0 95:224.0 97:2258.0 98:2557.0 99:3314.0 100:8235.0 101:12106.0 102:4980.0 103:138284.0 104:13086.0 105:11983.0 106:2042.0 107:1839.0 109:34.0 111:3194.0 112:1			298	410	948	342	235	363	227	86	227	436	364	527	433	385	854	409	227.746			143	600	510	397	979	415	398	410	365	285	292	364	429.833	206.806		1.05094	0.80779	228528
benzoic acid	338714	179	386128	85:701.0 86:636.0 87:586.0 88:414.0 89:113.0 91:38.0 92:14.0 97:60.0 99:7702.0 100:4008.0 101:494.0 102:282.0 103:277.0 105:16938.0 106:1164.0 107:167.0 108:19.0 110:1059.0 111:159.0 112:3.0 113:62.0 114:261.0 115:23.0 118:138.0 121:321.0 127:69.0 128:38.	C00180	243	31341	40100	417512	166413	134125	130576	53895	115299	38494	138268	47637	131785	143383	186865	279754	137030	102872			174242	158967	147472	185186	166374	59169	32901	130767	157343	197430	174424	144809	144090	49562.5		1.05153	0.829366	benzoic acid
225555	685994	266	225555	87:1.0 91:196.0 92:187.0 93:814.0 99:33.0 104:49.0 107:1850.0 109:28.0 110:668.0 111:52.0 115:16.0 116:139.0 121:353.0 122:42.0 123:121.0 124:10.0 125:5.0 132:6.0 133:179.0 136:404.0 140:147.0 141:8.0 144:66.0 145:13.0 149:3673.0 150:435.0 151:20.0 153:1.			1489	630	491	946	376	266	890	1093	206	719	3055	596	747	753	3369	1041.73	940.881			760	1789	267	499	661	191	606	2396	2275	947	767	2038	1099.67	796.745		1.05561	0.866449	225555
methionine	483568	176	243699	85:454.0 87:124.0 88:157.0 89:11837.0 90:886.0 91:406.0 93:55.0 94:473.0 95:65.0 96:347.0 98:34793.0 99:2989.0 100:6157.0 101:942.0 102:1291.0 103:8562.0 104:1156.0 105:1978.0 106:84.0 108:157.0 109:61.0 110:197.0 112:192.0 114:1776.0 115:1420.0 116:6996.	C00073	6137	5155	4270	1926	5525	4919	7633	6684	10800	5549	12159	6318	3934	4621	5401	8341	6215.67	2637.94			2512	6084	11026	11404	7002	3216	3874	4949	6978	8689	5293	7716	6561.92	2842.2		1.05571	0.746006	methionine
425836	274944	117	425836	86:147.0 87:482.0 95:3.0 99:4217.0 100:19735.0 101:1146.0 102:638.0 103:10.0 104:76.0 106:1139.0 110:311.0 114:185.0 115:115.0 116:105.0 117:35721.0 118:3254.0 119:1030.0 120:1.0 121:105.0 126:41.0 127:837.0 129:92.0 130:140.0 132:15.0 135:2.0 143:4.0 144			14723	26939	32199	16957	43389	51583	24005	2151	45811	10290	18665	26685	19958	21358	19825	24969.2	13500.5			15048	13015	11975	66047	9595	33419	14443	21260	25077	27082	25515	54110	26382.2	17477		1.05659	0.814397	425836
threonine	408861	117	368030	85:230.0 86:1747.0 89:234.0 90:160.0 91:534.0 92:73.0 93:25.0 97:191.0 100:2658.0 101:4921.0 102:497.0 103:464.0 105:127.0 107:4463.0 108:629.0 109:823.0 110:3505.0 111:165.0 112:90.0 114:804.0 115:113.0 117:5032.0 118:1887.0 119:578.0 120:124.0 127:210.0			63750	71146	28868	54366	70360	72849	88836	93459	73987	64970	62453	74613	47594	54349	118114	69314.3	20812.6			48169	73309	84576	98368	71478	75381	64324	53486	86862	76643	49600	96952	73262.3	17013.7		1.05696	0.600789	threonine
2,3,5-trihydroxypyrazine	531135	344	339626	85:184.0 86:354.0 87:46.0 88:14.0 93:118.0 100:397.0 101:264.0 102:159.0 103:145.0 111:102.0 112:53.0 114:132.0 119:70.0 128:161.0 129:254.0 130:308.0 131:853.0 132:945.0 133:122.0 134:109.0 135:379.0 137:178.0 139:155.0 141:29.0 143:133.0 144:281.0 147:3			326	316	563	267	442	199	360	50	177	226	359	95	225	195	574	291.6	152.23			201	251	174	551	166	241	186	225	466	820	175	244	308.333	201.589		1.05738	0.807727	2,3,5-trihydroxypyrazine
339490	450093	243	339490	85:140.0 86:140.0 89:2.0 90:346.0 92:99.0 93:95.0 95:86.0 97:97.0 98:92.0 99:187.0 100:1384.0 101:14.0 102:144.0 103:91.0 104:379.0 108:33.0 109:877.0 110:706.0 112:14.0 113:58.0 115:2.0 116:47.0 120:240.0 123:28.0 125:6.0 126:1.0 127:399.0 128:217.0 129:			234	195	670	258	510	441	650	122	157	177	835	310	269	857	813	433.2	267.576			145	253	182	967	263	174	209	143	847	1715	204	410	459.333	481.789		1.06033	0.859443	339490
inositol allo-	675911	318	203304	85:75.0 87:993.0 88:52.0 89:83.0 90:1.0 91:55.0 92:138.0 95:4.0 97:57.0 98:92.0 99:54.0 100:62.0 101:145.0 102:13.0 103:1047.0 104:42.0 105:16.0 106:13.0 107:10.0 108:5.0 109:5.0 110:16.0 111:53.0 112:18.0 113:45.0 114:1.0 115:39.0 116:45.0 117:255.0 118:	n/a	892	398	3087	2539	1952	861	5735	1192	3119	995	409	1109	2064	1764	3007	4876	2207.13	1563.65			2140	2435	391	2033	3695	1225	2569	1338	2006	723	6595	2959	2342.42	1631.84		1.06129	0.828326	inositol allo-
267805	390046	292	267805	85:2837.0 93:2.0 94:529.0 95:793.0 96:588.0 101:1747.0 102:321517.0 103:52765.0 104:13265.0 105:4223.0 106:412.0 109:122.0 110:80.0 113:168.0 115:27309.0 117:723473.0 118:70073.0 119:44167.0 120:3723.0 121:3184.0 122:519.0 123:1050.0 124:244.0 125:53.0 12			1025	525	727	713	1149	704	512	617	577	719	993	562	635	491	1426	758.333	270.624			673	560	1041	759	916	672	881	955	1080	987	428	707	804.917	203.163		1.06143	0.625308	267805
235678	530661	329	235678	85:1326.0 86:702.0 87:399.0 88:51.0 89:894.0 91:68.0 92:3.0 95:414.0 97:729.0 99:2060.0 100:1458.0 102:366.0 103:602.0 104:28.0 107:445.0 108:376.0 109:1010.0 110:531.0 111:560.0 112:123.0 113:549.0 115:512.0 116:368.0 117:604.0 118:404.0 120:2.0 124:99.0			1361	1244	1374	857	1923	1553	1307	1064	407	655	1225	1010	65	1951	2387	1225.53	601.61			463	717	375	2956	1556	718	1382	420	1274	4045	432	1405	1311.92	1133.07		1.07049	0.80113	235678
sucrose	915457	271	202121	85:3981.0 86:293.0 87:3599.0 88:1888.0 89:7902.0 90:405.0 94:202.0 95:878.0 97:2349.0 98:493.0 99:5155.0 100:380.0 101:12258.0 102:5648.0 103:153839.0 104:14863.0 105:7036.0 106:10.0 109:9388.0 111:4562.0 112:656.0 113:7191.0 114:1690.0 115:5383.0 116:545	C00089	5988	90	129	605	463	46	254	151	108	682	68	177	1167	71	187	315	300.867	310.601			74	209	27	684	253	203	13	150	206	1801	104	141	322.083	497.038		1.07052	0.893066	sucrose
213960	295965	211	213960	85:23.0 89:14.0 90:2.0 91:33.0 92:5.0 93:11.0 94:2.0 98:13.0 99:7.0 103:52.0 105:42.0 106:18.0 107:194.0 109:25.0 114:1.0 115:82.0 119:43.0 121:44.0 122:1.0 123:50.0 125:3.0 133:457.0 134:39.0 135:225.0 136:12.0 137:118.0 138:4.0 139:18.0 142:31.0 147:116			1253	1636	2695	1249	2202	1195	1487	1667	540	1642	1572	2508	2115	2335	2952	1803.2	652.042			1765	2054	1805	2056	2396	1731	1734	2156	1738	2387	2022	1331	1931.25	306.492		1.07101	0.537333	213960
211972	473115	98	211972	85:73.0 86:146.0 87:71.0 88:33.0 89:182.0 90:20.0 92:2.0 93:44.0 94:23.0 96:59.0 97:183.0 98:7261.0 99:492.0 100:623.0 101:414.0 102:936.0 103:885.0 104:67.0 105:12.0 106:2.0 107:2.0 108:36.0 109:2.0 110:257.0 111:2.0 112:43.0 113:5.0 114:105.0 115:100.0			43835	29204	38252	27344	27159	32211	28359	19900	21657	27104	31504	30451	25108	26932	38618	29842.5	6395.05			30552	33415	24047	44536	39336	37845	27106	16875	39382	39667	24864	26413	32003.2	8315.44		1.0724	0.452049	211972
409031	478576	159	409031	85:352.0 87:382.0 91:55.0 93:15.0 95:641.0 96:599.0 97:6298.0 98:418.0 99:791.0 101:247.0 103:108.0 109:904.0 110:219.0 111:1465.0 112:91.0 113:613.0 115:77.0 116:499.0 117:3557.0 118:266.0 119:36.0 121:394.0 122:23.0 124:20.0 125:1552.0 126:66.0 127:1242			244	233	64208	22929	16565	18232	207	16787	189	20141	199	18132	19772	27850	31323	17134.1	16936.3			23990	23459	20787	20100	24259	387	226	17547	22420	22009	24284	21999	18455.6	8696.76		1.07713	0.808429	409031
methionine sulfoxide	637775	128	218901	86:65.0 87:5.0 88:44.0 89:23.0 90:94.0 91:111.0 94:5.0 96:5.0 97:95.0 98:12.0 99:29.0 100:441.0 101:64.0 102:125.0 104:54.0 105:40.0 106:10.0 107:1.0 108:8.0 110:129.0 112:71.0 113:34.0 114:65.0 115:19.0 118:43.0 119:33.0 120:5.0 121:1.0 125:2.0 126:6.0 1	C02989	158980	5567	4038	10213	6395	5749	5592	11377	4288	3998	3249	5321	3810	2668	5156	5815	5549.07	2385.17			13682	7966	3392	6270	7054	7134	3553	3027	5360	4405	5373	4833	6004.08	2887.04		1.082	0.657457	methionine sulfoxide
408731	397310	97	408731	85:1205.0 86:491.0 87:1740.0 88:107.0 89:51.0 90:17.0 92:6.0 95:774.0 96:449.0 97:13904.0 98:1185.0 99:467.0 100:163.0 103:246.0 104:5.0 106:5.0 108:56.0 109:2986.0 110:450.0 111:2737.0 112:292.0 113:1060.0 114:814.0 115:10737.0 116:786.0 118:39.0 125:5.0			1359	2131	127442	43437	32030	35614	1651	32964	1570	38842	1675	35604	38454	52922	70448	34409.5	33575.1			47622	44885	41543	45989	46688	2013	1585	34890	44397	48947	47972	42333	37405.3	17049		1.08706	0.781224	408731
415158	493182	173	415158	85:59.0 87:663.0 88:182.0 89:134.0 90:5.0 91:268.0 92:23.0 93:199.0 95:534.0 96:77.0 97:3845.0 98:349.0 99:832.0 100:89.0 101:179.0 109:907.0 110:31.0 111:1250.0 112:156.0 113:354.0 114:14.0 115:800.0 116:299.0 117:3517.0 118:126.0 119:202.0 121:98.0 123:			121	122	21933	8646	5901	6715	131	6063	126	7212	163	6134	7334	9466	11032	6073.27	5818.93			8582	8294	7493	7410	8323	174	148	6158	8192	7959	8430	8368	6627.58	3092.28		1.09127	0.768661	415158
tocopherol alpha	1067178	237	199211	85:104.0 87:137.0 88:41.0 89:11.0 90:4.0 91:148.0 93:40.0 95:122.0 96:126.0 97:86.0 98:19.0 99:27.0 100:8.0 101:6.0 103:9.0 104:17.0 105:75.0 106:13.0 107:39.0 109:47.0 110:20.0 111:25.0 112:5.0 114:8.0 115:35.0 116:21.0 117:59.0 118:15.0 119:154.0 120:35	C02477	14985	10868	13269	7453	8697	6587	8521	6946	8598	13370	5964	13521	14583	12245	14461	8102	10212.3	3089.93			11155	5237	5864	3725	15118	12331	12901	19350	12176	6996	13866	15246	11163.8	4747.65		1.09316	0.535209	tocopherol alpha
408611	574677	269	408611	85:72.0 86:502.0 87:485.0 88:588.0 90:681.0 92:189.0 94:437.0 95:214.0 96:300.0 97:144.0 98:473.0 99:215.0 100:4933.0 101:941.0 102:1175.0 104:357.0 105:404.0 106:21.0 107:92.0 108:70.0 109:79.0 110:401.0 111:136.0 112:489.0 113:196.0 114:606.0 115:453.0			2150	4660	1808	3554	2889	5395	4614	6572	5407	4559	2772	3947	3049	3033	4122	3902.07	1324.17			3434	3227	3611	5556	3905	3721	4480	3225	6180	5692	2595	5620	4270.5	1196.35		1.09442	0.460649	408611
proline	364232	142	199611	85:2.0 88:15.0 91:98.0 92:102.0 95:3.0 96:5.0 98:3.0 99:10.0 100:74.0 101:25.0 107:26.0 110:19.0 113:5.0 115:2.0 117:33.0 118:16.0 126:28.0 127:10.0 128:9.0 130:1.0 131:13.0 132:12.0 133:2.0 134:56.0 135:2.0 136:9.0 140:21.0 141:4.0 142:3396.0 143:428.0 1	C00148	145742	37467	44746	3197	10539	7057	31529	7412	109154	92397	79759	8681	41718	56510	5171	10237	36371.6	34575.6			62431	19139	101509	16133	33797	43905	51914	53226	21418	10705	31479	32744	39866.7	25209		1.09609	0.771997	proline
valine	313224	144	199605	85:48.0 86:132.0 87:8.0 88:9.0 89:2.0 90:21.0 91:58.0 92:93.0 93:1.0 97:102.0 98:14.0 99:2.0 100:836.0 101:92.0 102:11.0 103:76.0 104:20.0 105:42.0 106:2.0 107:49.0 109:2.0 110:18.0 111:13.0 112:18.0 113:8.0 114:87.0 115:99.0 116:9.0 117:113.0 118:31.0 11	C00183	6287	190987	188713	181349	225648	179272	276031	299638	291297	206659	261152	236851	163121	189482	183873	343166	227816	54413			231595	293664	254700	410389	263643	182275	182095	186238	244680	370447	168588	209358	249806	76429.7		1.09653	0.390881	valine
226876	697041	174	226876	86:1942.0 87:12.0 88:397.0 89:807.0 91:233.0 96:55.0 97:95.0 98:758.0 100:1374.0 101:373.0 102:203.0 103:185.0 105:68.0 107:376.0 108:46.0 110:268.0 114:415.0 116:515.0 118:233.0 120:6.0 121:80.0 122:21.0 123:76.0 128:86.0 129:510.0 130:183.0 134:296.0 13			1104	22183	21728	13634	20104	18806	15488	14490	18637	39492	21138	19060	27109	10868	18071	18794.1	8269.16			12443	13536	23688	21832	21596	580	24863	19869	28731	27626	20098	32853	20642.9	8601.45		1.09837	0.575682	226876
288822	221570	259	288822	85:79.0 88:349.0 89:3627.0 90:75.0 91:728.0 92:19.0 93:92.0 96:119.0 98:341.0 100:1384.0 101:953.0 102:122.0 104:4132.0 105:278.0 106:52.0 107:15327.0 108:655.0 109:463.0 110:3937.0 112:209.0 113:57.0 115:438.0 117:1764.0 119:1377.0 120:234.0 121:363.0 12			935	1880	7240	4350	2492	1908	1668	2938	1728	3595	1712	3650	3630	4551	3806	3072.2	1603			4429	4121	4662	2403	3961	1943	1616	4573	2449	2402	4975	2994	3377.33	1194.73		1.09932	0.588561	288822
cholesterol	1079689	129	384892	85:434.0 86:48.0 89:77.0 91:2425.0 92:278.0 93:1904.0 94:651.0 95:2845.0 96:349.0 97:296.0 98:23.0 99:206.0 101:171.0 102:39.0 103:27.0 104:205.0 105:2650.0 106:466.0 107:2111.0 108:292.0 109:1381.0 110:24.0 111:309.0 113:49.0 114:43.0 115:206.0 116:257.0	C00187	5997	454525	659893	253935	316152	355061	202216	294551	373870	245137	161286	287606	476902	488856	610686	145211	355059	155435			325624	214153	186615	170233	562962	408946	837561	551125	338071	304459	421938	370726	391034	188937		1.10132	0.591772	cholesterol
glutamine dehydrated	520069	227	200890	85:2672.0 86:3099.0 87:1409.0 88:348.0 89:79.0 90:8.0 93:122.0 94:202.0 95:441.0 96:497.0 97:761.0 98:2775.0 99:1089.0 100:12411.0 101:2646.0 102:1206.0 103:1370.0 104:272.0 105:517.0 106:81.0 108:97.0 109:399.0 110:1206.0 111:1842.0 112:13615.0 113:7602.	C00064	5961	1060	1100	567	519	589	685	1380	546	1020	720	1027	1374	1276	631	1285	918.6	323.451			1259	500	675	430	453	1406	1886	1097	1146	664	1721	909	1012.17	492.361		1.10186	0.557655	glutamine dehydrated
2,5-furandicarboxylic acid	543827	285	348921	85:472.0 86:307.0 90:60.0 92:18.0 93:526.0 94:262.0 95:110.0 97:172.0 98:301.0 99:88.0 100:62.0 101:263.0 103:1234.0 104:164.0 106:166.0 107:166.0 108:69.0 109:343.0 110:279.0 113:526.0 114:159.0 116:124.0 122:161.0 126:43.0 127:274.0 128:117.0 129:159.0	n/a	76720	132	138	403	129	104	104	110	78	148	113	121	129	137	150	296	152.8	84.497			137	155	126	176	170	253	168	116	168	205	127	220	168.417	41.1681		1.1022	0.563509	2,5-furandicarboxylic acid
270066	288528	157	270066	85:4403.0 86:559.0 87:1297.0 88:4452.0 89:551.0 90:126.0 94:132.0 95:4677.0 96:294.0 97:511.0 99:896.0 100:246.0 101:4237.0 102:704.0 103:610.0 104:95.0 105:301.0 108:286.0 109:56.0 110:27.0 111:278.0 113:2721.0 114:312.0 115:9405.0 116:1399.0 117:55973.0			127	231	107591	38114	28289	27994	118	27236	180	31651	112	32867	34574	45347	58081	28834.1	28773			44675	38827	34798	37419	40250	166	182	32237	35037	39879	44357	34221	31837.3	15276.2		1.10415	0.74725	270066
alanine	241959	116	214086	85:86.0 86:241.0 87:38.0 88:65.0 89:11.0 93:5.0 94:104.0 95:40.0 96:12.0 97:152.0 98:13.0 100:407.0 101:81.0 102:133.0 103:283.0 104:3.0 110:11.0 111:3.0 113:48.0 114:62.0 115:57.0 116:6824.0 117:860.0 118:232.0 119:40.0 125:20.0 126:6.0 127:19.0 128:92.0	C00041	5950	405062	276862	171300	222967	187675	401213	169159	370962	268316	396125	230416	408546	298920	221716	329305	290570	89286.7			435715	331166	456704	285408	329208	261022	256302	342453	299485	239474	216481	398529	320996	77048		1.10471	0.359297	alanine
223973	1028825	243	223973	85:286.0 88:129.0 95:141.0 96:165.0 97:270.0 98:191.0 99:142.0 100:51.0 101:819.0 102:39.0 103:376.0 106:141.0 110:4.0 111:88.0 113:203.0 115:182.0 116:136.0 117:132.0 120:54.0 121:98.0 123:66.0 124:20.0 125:71.0 129:4677.0 130:713.0 131:483.0 132:39.0 13			1025	1144	400	205	767	1064	793	939	1343	583	1195	1196	2459	982	1180	1018.33	510.09			985	389	387	261	965	1139	1373	1415	1574	1019	1317	2678	1125.17	652.641		1.10491	0.636856	223973
226843	551430	171	226843	85:877.0 86:3059.0 87:654.0 88:213.0 90:82.0 91:329.0 93:122.0 95:231.0 97:381.0 98:2157.0 99:2085.0 100:5946.0 101:2099.0 102:6936.0 103:1290.0 104:476.0 106:29.0 107:863.0 108:109.0 109:684.0 110:422.0 111:89.0 112:657.0 113:243.0 114:492.0 115:914.0 11			7160	6776	10738	18245	14290	22725	21794	9299	3827	14714	17879	6952	6972	23544	29862	14318.5	7773.45			8397	17748	9537	39797	17067	3924	3645	2539	23209	42811	6117	15603	15866.2	13545.1		1.10809	0.712036	226843
taurine	557250	326	234595	85:2682.0 86:34189.0 87:3463.0 88:1176.0 89:1034.0 90:695.0 91:5.0 93:1464.0 95:790.0 97:788.0 98:2446.0 99:2349.0 100:60731.0 101:6086.0 102:5145.0 103:1284.0 104:490.0 107:1220.0 110:1333.0 111:651.0 112:4906.0 113:4539.0 114:7587.0 115:2701.0 116:2604.	C00245	1123	964	1769	3000	1947	502	1929	2632	1413	2306	2212	1688	3078	1723	1120	2000	1885.53	715.896			2051	1822	1624	1603	1205	3900	893	2797	2866	2334	1172	2812	2089.92	881.392		1.1084	0.511835	taurine
histidine	663715	154	367905	85:2348.0 86:3547.0 87:54.0 90:316.0 92:486.0 93:154.0 94:463.0 95:54.0 96:628.0 97:28.0 98:2643.0 99:903.0 100:17525.0 101:3329.0 102:823.0 103:2040.0 104:144.0 105:129.0 107:543.0 108:286.0 110:325.0 111:1505.0 112:3820.0 113:683.0 114:707.0 116:1014.0			25224	54480	23581	49275	25889	63487	43482	86383	65276	79350	32439	42231	67307	36169	75504	51338.5	20770.5			56092	67808	56529	55431	54334	38144	47518	54611	51783	52386	58914	89358	56909	12349.8		1.10851	0.420738	histidine
phosphoric acid	344674	314	199165	85:1141.0 86:213.0 87:1561.0 88:399.0 89:1740.0 90:310.0 91:1827.0 92:509.0 93:635.0 94:79.0 95:146.0 96:332.0 97:66.0 98:187.0 99:189.0 100:388.0 102:553.0 103:4819.0 104:1286.0 105:4011.0 106:778.0 107:2556.0 108:270.0 109:902.0 110:31.0 111:43.0 112:70	C00009	1004	147761	159640	91786	158678	152724	169317	143103	129628	140450	121307	150855	159647	145981	134723	294495	153340	43403.9			140043	164371	129977	245934	146744	130899	170197	162209	173379	243900	156665	183193	170626	38432		1.11273	0.290033	phosphoric acid
213961	897509	91	213961	85:3.0 86:13.0 88:13.0 89:34.0 90:3.0 91:1981.0 92:349.0 93:833.0 94:184.0 95:258.0 96:10.0 97:8.0 98:4.0 100:5.0 101:42.0 102:8.0 103:184.0 104:77.0 105:563.0 106:389.0 107:199.0 108:287.0 109:71.0 110:7.0 111:2.0 114:7.0 115:90.0 116:186.0 117:895.0 118			1857	919	1062	744	561	624	604	601	683	545	1336	1435	627	787	956	889.4	384.809			837	1352	985	556	917	711	1126	1648	886	677	1459	771	993.75	337.639		1.11733	0.467053	213961
199609	1246841	129	199609	85:398.0 86:47.0 87:56.0 88:35.0 89:40.0 90:1.0 91:112.0 92:40.0 93:205.0 94:142.0 95:1412.0 96:566.0 97:544.0 98:353.0 99:197.0 100:71.0 101:129.0 102:22.0 103:800.0 104:71.0 105:34.0 106:9.0 107:80.0 108:74.0 109:510.0 110:118.0 111:206.0 112:70.0 113:2			11314	9413	2406	6081	5595	3910	7465	3334	5329	2351	6253	8606	6265	7602	1178	5806.8	2835.31			4491	1900	3141	1503	5440	10222	20137	7989	6993	3277	4862	8059	6501.17	5048.45		1.11958	0.654994	199609
281112	802983	232	281112	86:371.0 87:4.0 88:64.0 89:782.0 90:14.0 97:580.0 98:1002.0 100:247.0 101:379.0 102:333.0 103:4389.0 104:367.0 106:12.0 111:151.0 114:456.0 115:160.0 116:1503.0 117:712.0 118:5.0 120:37.0 128:1747.0 129:100.0 130:512.0 131:101.0 132:178.0 133:79.0 142:3.0			1125	3086	1077	2008	619	1477	784	3842	1584	2485	1872	1992	2769	1135	1426	1818.73	904.364			910	568	2511	572	1079	902	7830	2379	1038	1913	2455	2376	2044.42	1976.75		1.12409	0.696263	281112
199177	583891	205	199177	85:446.0 86:139.0 88:407.0 89:2950.0 90:295.0 91:451.0 92:260.0 93:142.0 94:17.0 95:119.0 96:52.0 97:40.0 98:105.0 99:361.0 100:182.0 101:1736.0 102:319.0 103:8591.0 104:839.0 105:630.0 106:80.0 107:43.0 108:30.0 110:34.0 111:67.0 112:13.0 113:471.0 114:6			2421	2339	2059	1822	2868	2498	2216	3368	2385	1969	2234	3654	5890	2035	3922	2778.67	1066.34			6993	1496	2178	2480	2170	2818	1935	7353	2724	2618	2050	3002	3151.42	1926.05		1.13415	0.52868	199177
serine	391397	204	227962	85:291.0 86:1295.0 87:675.0 88:1087.0 89:864.0 90:47.0 92:50.0 93:16.0 97:18.0 98:65.0 99:114.0 100:17725.0 101:2373.0 102:1134.0 103:3887.0 104:329.0 105:468.0 106:100.0 108:117.0 109:26.0 110:268.0 112:15.0 113:132.0 114:2111.0 115:1502.0 116:6271.0 117	C00065	5951	59332	46331	26482	53750	75428	50412	73155	49357	50650	66743	66247	63148	47770	41745	73196	56249.7	13611.7			50150	63441	59371	90709	45418	75743	55083	63302	85324	59644	51061	66923	63847.4	13946.3		1.13507	0.166331	serine
281187	574112	185	281187	85:859.0 86:1257.0 88:81.0 90:3.0 94:57.0 95:200.0 96:1.0 98:615.0 99:373.0 100:1433.0 101:419.0 102:350.0 107:170.0 108:112.0 110:2324.0 112:228.0 113:183.0 114:101.0 116:814.0 117:1979.0 118:101.0 119:1.0 120:1.0 122:4.0 124:275.0 127:271.0 128:319.0 13			402	2100	1797	1056	1024	2427	1514	3392	2367	6778	1969	1562	3658	2189	3289	2368.27	1520.65			1003	2252	3860	2779	3642	601	2312	3203	4017	4465	1642	2655	2702.58	1209.81		1.14117	0.540925	281187
glycine	364262	174	227957	85:106.0 86:18631.0 87:1854.0 88:801.0 91:1.0 92:57.0 99:116.0 100:9522.0 101:1976.0 102:1247.0 104:2.0 105:236.0 106:36.0 107:610.0 110:120.0 111:82.0 113:277.0 114:297.0 115:275.0 116:491.0 117:2457.0 118:465.0 119:450.0 120:26.0 122:5.0 124:68.0 125:11	C00037	750	289159	156275	214104	142695	130144	149360	217926	156574	163279	161457	171922	252386	181210	154528	176358	181158	43929.1			269148	181671	178756	200321	146483	255377	181942	151518	302821	222274	208157	184290	206896	47660.7		1.14207	0.157542	glycine
malic acid	461034	233	247180	85:2264.0 86:902.0 87:1518.0 88:378.0 89:1155.0 90:554.0 92:395.0 93:984.0 94:145.0 95:104.0 96:257.0 97:369.0 98:108.0 99:2895.0 100:593.0 101:29374.0 102:3884.0 103:4294.0 104:868.0 105:1798.0 106:583.0 107:3435.0 108:9.0 109:4.0 110:171.0 111:30.0 113:	C00149	222656	1576	768	560	705	973	728	588	847	599	614	896	773	705	455	985	784.8	266.705			764	917	585	1209	927	680	1063	892	998	933	740	1064	897.667	178.981		1.14382	0.221119	malic acid
glutamine	598894	156	410985	85:21565.0 86:6483.0 87:13090.0 88:3149.0 89:13706.0 90:1746.0 91:6592.0 92:399.0 93:2500.0 95:2630.0 96:3174.0 97:10249.0 98:6519.0 99:9116.0 100:22840.0 101:21737.0 102:6442.0 103:82141.0 104:11676.0 105:6237.0 106:709.0 107:362.0 109:3854.0 110:44533.0	C00064	5961	123383	211722	190253	281555	174617	355471	240880	600151	294304	407965	115985	291930	345308	263830	287167	278968	121379			284053	391541	357252	387869	402954	203304	226645	247141	324605	283707	329974	409576	320718	71594		1.14966	0.302987	glutamine
hippuric acid	638257	105	202598	85:9.0 86:224.0 87:176.0 88:139.0 89:4.0 90:51.0 91:87.0 92:353.0 93:25.0 94:4.0 95:2.0 96:69.0 100:63.0 101:17.0 102:76.0 103:286.0 104:298.0 105:11540.0 106:884.0 107:79.0 108:1.0 109:1.0 110:23.0 112:49.0 116:141.0 117:43.0 118:151.0 119:24.0 121:39.0	C01586	464	4182	5190	4526	1116	1996	6129	2321	1623	3255	1505	1827	4447	5013	3756	2991	3325.13	1559.19			7378	1781	4446	1940	1751	4150	2348	4193	3450	2299	7565	4658	3829.92	2013.93		1.15181	0.469288	hippuric acid 1TMS
threonic acid	497167	292	199262	86:2.0 89:214.0 90:4.0 92:93.0 93:57.0 95:1.0 99:8.0 100:9.0 101:144.0 102:985.0 103:1234.0 104:105.0 105:26.0 107:28.0 108:10.0 113:18.0 115:5.0 116:4.0 117:1493.0 118:105.0 119:89.0 123:1.0 127:13.0 129:137.0 130:742.0 131:341.0 132:49.0 133:624.0 134:7	C01620	439535	5315	5269	4119	5254	5465	5774	4898	4975	2953	4990	5916	3395	2404	4961	6637	4821.67	1146.03			5424	8246	1554	5456	9571	3905	8323	5744	4855	5421	3497	4984	5581.67	2233.74		1.15762	0.26256	threonic acid
267884	272140	234	267884	86:2298.0 87:801.0 89:15564.0 90:1589.0 91:716.0 94:1.0 95:88.0 96:57.0 98:117.0 99:2083.0 100:4284.0 101:1399.0 102:470.0 103:872.0 104:10699.0 105:550.0 108:233.0 109:109.0 110:39.0 111:42.0 113:519.0 114:1023.0 115:5375.0 116:969.0 117:128.0 118:439.0			1462	980	6376	902	1192	1232	1054	2055	845	1688	1599	1447	1097	1613	2483	1735	1359.32			1312	1802	943	3589	1989	2319	2670	1641	2157	2438	2056	1217	2011.08	717.675		1.15913	0.531385	267884
5-hydroxymethyl-2-furoic acid	497599	123	300330	85:29.0 86:70.0 87:240.0 89:285.0 91:166.0 92:57.0 93:89.0 94:57.0 95:1445.0 96:141.0 97:212.0 98:21.0 99:162.0 100:413.0 101:139.0 103:336.0 104:202.0 105:29.0 106:481.0 107:12.0 108:190.0 109:212.0 110:399.0 111:1080.0 112:21.0 113:792.0 114:330.0 115:6	n/a	80642	123	152	449	140	127	122	133	115	158	190	164	151	162	170	226	172.133	81.8944			180	204	149	170	260	245	164	173	168	196	258	228	199.583	39.0255		1.15947	0.296893	5-hydroxymethyl-2-furoic acid
419574	251243	198	419574	85:782.0 86:635.0 90:92.0 91:188.0 92:113.0 95:97.0 96:48.0 97:165.0 98:162.0 99:140.0 100:2183.0 101:214.0 102:428.0 103:27.0 104:501.0 106:98.0 107:677.0 108:15.0 109:117.0 110:213.0 112:124.0 113:374.0 114:488.0 116:94.0 117:120.0 118:282.0 120:1497.0			270	322	350	131	217	254	454	232	334	312	454	353	515	164	361	314.867	107.817			603	347	181	305	281	403	225	281	414	289	466	589	365.333	134.209		1.16028	0.288468	419574
glycerol-3-galactoside	803554	204	225851	85:124.0 89:669.0 99:195.0 101:2858.0 102:90.0 103:11903.0 104:601.0 105:217.0 109:189.0 111:216.0 113:217.0 115:113.0 116:1129.0 117:2765.0 119:18.0 124:4.0 129:5225.0 130:291.0 131:1903.0 133:1995.0 142:58.0 143:525.0 147:7954.0 148:644.0 149:699.0 151:	C05401	656504	591	538	948	559	352	632	566	385	868	627	594	986	829	604	704	652.2	185.281			424	585	443	392	661	1283	1317	1145	565	423	680	1166	757	362.311		1.16069	0.338775	glycerol-3-galactoside
conduritol-beta-epoxide	704220	318	208840	85:837.0 86:241.0 87:1067.0 88:393.0 89:783.0 90:67.0 91:508.0 92:185.0 93:255.0 94:127.0 95:352.0 96:333.0 97:498.0 98:274.0 99:1092.0 100:167.0 101:2528.0 102:825.0 103:13982.0 104:1459.0 105:1031.0 106:159.0 107:209.0 108:86.0 109:357.0 110:109.0 111:1	n/a	119054	1900	1319	1054	1631	1538	1451	1521	1392	1395	961	2305	3018	3784	1249	3535	1870.2	888.17			1473	2119	714	2012	2767	2105	1263	2113	2899	3073	1947	3605	2174.17	813.267		1.16253	0.367984	conduritol-beta-epoxide
305055	197786	130	305055	85:678.0 86:799.0 87:247.0 88:683.0 90:84.0 91:266.0 93:274.0 95:147.0 97:686.0 98:29.0 99:48.0 100:955.0 102:94.0 104:213.0 105:223.0 106:260.0 107:2873.0 108:455.0 109:261.0 110:1837.0 111:623.0 112:76.0 113:31.0 114:154.0 116:7.0 118:631.0 120:59.0 125			7417	19055	63553	34094	5419	3609	42078	279	11238	46219	32254	6820	5333	4066	9180	19374.3	19421.4			55829	53515	44117	11646	59524	9461	9992	2803	4923	11547	3941	3838	22594.7	23089.9		1.16622	0.697058	305055
creatinine	502434	115	199603	85:33.0 86:125.0 87:4.0 88:21.0 89:2.0 91:138.0 92:33.0 93:3.0 94:1.0 97:3.0 98:24.0 99:272.0 100:2703.0 101:266.0 102:90.0 105:11.0 106:2.0 107:5.0 108:1.0 110:49.0 111:11.0 112:6.0 113:112.0 114:433.0 115:6116.0 116:644.0 117:253.0 118:19.0 126:17.0 127	C00791	588	5261	9917	1915	3605	3174	4825	2612	21089	11576	10514	2422	9409	13680	2128	11561	7579.2	5543.45			10051	6647	13288	6070	5756	8959	8807	15350	3566	4303	11100	12582	8873.25	3731.15		1.17074	0.495508	creatinine
202571	648828	204	202571	85:4686.0 86:1274.0 87:6539.0 88:2466.0 89:24486.0 90:2202.0 91:1348.0 92:139.0 93:176.0 94:310.0 95:607.0 96:220.0 97:2138.0 98:834.0 99:5459.0 100:831.0 101:24539.0 102:4585.0 103:73167.0 104:7200.0 105:5436.0 106:471.0 107:367.0 108:155.0 109:3332.0 11			93839	106271	317272	152452	123906	204024	110889	171649	231861	139486	96724	118127	93254	427377	234969	174807	95417.6			142771	378515	236587	126840	398205	151053	113803	170704	122743	64700	469587	84895	205034	135412		1.17292	0.502652	202571
280564	528055	255	280564	85:1726.0 86:1061.0 87:593.0 90:199.0 92:31.0 93:55.0 95:66.0 96:5.0 97:33.0 98:140.0 100:1564.0 101:37.0 103:770.0 109:54.0 110:181.0 111:158.0 112:69.0 113:1394.0 114:271.0 115:415.0 116:384.0 118:894.0 119:915.0 123:15.0 124:63.0 126:99.0 128:496.0 129			351	701	510	472	567	1161	1016	2613	1808	1864	559	645	759	929	467	961.467	648.61			1101	847	1277	1934	1673	769	815	494	1221	1317	758	1348	1129.5	416.37		1.17477	0.444509	280564
226927	824957	445	226927	85:195.0 86:9.0 87:791.0 94:90.0 95:2.0 96:1.0 97:29.0 99:35.0 101:354.0 103:363.0 104:40.0 111:64.0 112:90.0 114:3.0 116:176.0 130:109.0 131:35.0 132:22.0 137:37.0 140:120.0 141:25.0 143:188.0 144:444.0 147:429.0 148:19.0 152:20.0 154:112.0 155:34.0 156:			463	598	586	413	440	443	431	792	285	1320	298	625	1183	363	1009	616.6	320.521			738	838	1117	423	552	508	458	824	522	755	1147	836	726.5	242.787		1.17824	0.335417	226927
cysteine	499495	220	223529	85:121.0 86:701.0 90:5.0 91:8.0 99:42.0 100:3938.0 101:418.0 102:407.0 109:65.0 110:215.0 111:289.0 112:341.0 113:261.0 114:357.0 115:440.0 116:751.0 117:18.0 119:105.0 124:17.0 127:32.0 128:839.0 129:223.0 130:214.0 131:935.0 132:988.0 133:9.0 134:155.0	C00097	594	778	736	940	1693	792	3440	1405	5200	2121	5385	2670	2160	3668	2190	2006	2345.6	1497.85			889	1460	6380	4401	2303	1124	1071	1387	2251	6844	2200	2878	2765.67	2042.2		1.17909	0.5429	cysteine
adenosine-5-phosphate	1038945	169	362124	90:9.0 95:11.0 96:118.0 111:23.0 112:44.0 114:9.0 121:215.0 122:17.0 123:64.0 125:16.0 129:50.0 133:46.0 136:54.0 137:18.0 140:49.0 141:43.0 142:27.0 147:102.0 149:99.0 150:27.0 151:126.0 153:28.0 155:44.0 156:36.0 157:18.0 163:47.0 165:190.0 169:1531.0 1	C00020	6083	150	301	506	245	203	198	160	165	228	216	172	206	251	185	335	234.733	91.0318			230	210	157	242	183	499	377	470	288	190	178	304	277.333	115.172		1.18148	0.292818	adenosine-5-phosphate
281108	857519	362	281108	85:228.0 86:1291.0 88:94.0 89:97.0 90:20.0 91:105.0 94:100.0 96:489.0 97:4699.0 98:422.0 99:383.0 100:2015.0 101:139.0 102:745.0 103:11001.0 104:968.0 105:106.0 111:750.0 112:84.0 113:234.0 114:896.0 115:2.0 116:2225.0 118:278.0 119:197.0 124:44.0 126:112			84	435	377	1827	649	3433	1176	5234	1942	6086	895	1743	4073	1001	1917	2058.13	1832.99			1558	2849	6026	1505	1548	125	286	2629	4091	1566	3145	4478	2483.83	1748.41		1.20684	0.546123	281108
226903	833661	313	226903	85:109.0 87:2.0 89:71.0 91:18.0 93:286.0 94:265.0 95:188.0 96:352.0 97:60.0 99:41.0 103:336.0 108:10.0 110:514.0 111:11.0 112:1.0 114:41.0 116:278.0 117:751.0 118:167.0 121:118.0 122:66.0 123:72.0 124:980.0 125:31.0 128:101.0 129:126.0 130:233.0 131:236.0			692	1108	1287	1489	1428	1110	1051	2399	577	3749	1210	1633	2952	1021	2819	1635	919.431			2515	2774	3302	1002	2087	899	755	2632	1591	1357	3012	2143	2005.75	871.24		1.22676	0.296896	226903
281363	710284	290	281363	86:58.0 90:56.0 95:31.0 97:574.0 98:362.0 100:618.0 101:151.0 102:85.0 103:3009.0 104:76.0 108:21.0 111:137.0 112:43.0 113:258.0 114:259.0 116:677.0 117:259.0 124:22.0 128:174.0 129:7.0 130:375.0 132:79.0 133:252.0 140:253.0 141:104.0 142:2.0 143:47.0 144			149	759	620	251	545	1101	948	1223	1256	2494	963	1117	1935	918	893	1011.47	595.243			379	870	1563	1261	1183	180	764	1555	2000	1801	1599	2017	1264.33	607.04		1.25	0.287264	281363
N-methylalanine	286258	130	205663	86:191.0 87:45.0 88:27.0 89:4.0 91:12.0 93:41.0 94:19.0 96:29.0 97:6.0 98:152.0 99:11.0 100:465.0 101:117.0 102:65.0 103:157.0 104:2.0 105:14.0 106:6.0 107:6.0 109:9.0 111:4.0 112:19.0 113:12.0 114:188.0 115:78.0 116:14.0 117:66.0 118:19.0 119:22.0 120:1.	C02721	5288725	17130	15419	10357	17981	22806	18270	20578	17430	13581	23130	16083	14729	12171	16258	30571	17766.3	5002.98			18382	25051	29094	29196	26164	15827	17442	16726	31277	22621	11914	23543	22269.8	6166.07		1.25349	0.046266	N-methylalanine
trans-4-hydroxyproline	460567	158	199804	85:7.0 86:18.0 87:14.0 88:14.0 89:9.0 90:3.0 91:57.0 92:25.0 93:13.0 97:6.0 98:13.0 99:21.0 100:89.0 101:55.0 102:8.0 103:211.0 104:4.0 105:1.0 106:4.0 107:26.0 108:7.0 110:11.0 112:12.0 113:4.0 115:43.0 116:133.0 117:16.0 119:3.0 120:2.0 122:2.0 124:7.0	C01157	5810	1337	1245	716	522	665	1044	697	1320	1315	615	850	943	1304	600	991	944.267	301.213			726	480	845	1118	545	1253	3070	1619	1021	1553	1033	1078	1195.08	686.179		1.26562	0.214023	trans-4-hydroxyproline
415114	249956	89	415114	86:356.0 88:880.0 89:7015.0 90:758.0 91:462.0 92:35.0 98:80.0 99:38.0 100:1359.0 102:1293.0 103:9.0 104:135.0 107:18.0 108:51.0 110:561.0 113:194.0 116:2967.0 117:267.0 120:29.0 122:8.0 123:118.0 128:6.0 130:502.0 131:1135.0 132:87.0 133:577.0 134:642.0 1			4330	6446	12759	5512	9682	9773	6520	11089	5589	5364	6691	6855	10636	6950	6828	7668.27	2478.29			18836	7059	5746	4842	6845	6253	5312	13689	14541	4874	15384	14047	9785.67	5069.67		1.27612	0.166923	415114
204157	451314	103	204157	85:124.0 86:431.0 87:94.0 88:118.0 89:1468.0 90:121.0 91:52.0 92:24.0 93:9.0 94:12.0 95:9.0 96:7.0 97:34.0 98:60.0 99:45.0 100:416.0 101:296.0 102:151.0 103:2884.0 104:251.0 105:286.0 106:32.0 107:6.0 109:5.0 110:7.0 111:14.0 112:30.0 113:36.0 114:246.0 1			1301	809	4450	1244	1020	2267	1071	1467	4034	1031	1357	1988	3103	1434	1585	1877.4	1122.29			1083	1387	941	2002	1269	1463	873	1187	1633	3710	9582	3849	2414.92	2467.8		1.28631	0.457689	204157
dihydro-3-coumaric acid	583527	205	275091	85:665.0 86:52.0 88:1430.0 89:279.0 90:100.0 91:486.0 92:56.0 93:325.0 94:17.0 95:757.0 96:210.0 97:1352.0 98:993.0 99:91.0 100:39.0 101:2120.0 102:124.0 103:243.0 104:80.0 105:526.0 106:59.0 107:135.0 108:2.0 109:191.0 110:29.0 111:417.0 112:90.0 113:26.	C11457	91	2421	2524	1534	1528	3026	2394	2216	2902	2385	1093	2234	3654	5606	1563	3389	2564.6	1103.99			6782	1482	2178	2165	1847	3054	2244	7042	2354	2618	6071	2178	3334.58	2034.9		1.30024	0.220638	dihydro-3-coumaric acid
226841	759286	232	226841	85:87.0 86:2474.0 87:458.0 88:808.0 89:484.0 94:75.0 95:202.0 96:170.0 97:2294.0 98:293.0 99:151.0 100:1861.0 101:1638.0 102:438.0 103:6923.0 104:378.0 105:334.0 106:90.0 111:401.0 112:34.0 114:864.0 115:723.0 116:3651.0 117:2324.0 118:310.0 119:138.0 123			447	7537	15066	18654	14486	17456	10847	18592	18360	18361	12281	22373	30514	13348	15308	15575.3	6762.14			21878	24388	18806	13550	28565	1160	5346	21524	18648	11494	42640	36252	20354.2	11910.8		1.30683	0.200399	226841
268365	459616	155	268365	85:9749.0 86:15708.0 87:8647.0 88:2670.0 89:2466.0 90:350.0 91:407.0 92:819.0 93:3390.0 94:1992.0 95:1304.0 96:2757.0 97:1430.0 98:14443.0 99:13097.0 100:76436.0 101:11531.0 102:8100.0 103:49519.0 104:5150.0 105:5844.0 106:897.0 107:7497.0 108:970.0 109:4			438	282	2078	1115	598	947	678	1161	175	1300	487	1345	840	986	2515	996.333	642.225			1069	1564	1302	3327	1628	364	327	579	826	2820	1212	1018	1336.33	918.919		1.34125	0.268803	268365
iminodiacetic acid	485548	232	281106	85:2729.0 86:8458.0 88:1582.0 89:2478.0 90:119.0 91:50.0 95:472.0 96:27.0 98:2810.0 99:1522.0 100:7421.0 101:3495.0 102:1380.0 103:2595.0 104:189.0 105:954.0 106:340.0 107:588.0 108:119.0 109:19.0 111:205.0 112:1331.0 113:1962.0 114:3132.0 115:3479.0 116:		8897	5256	13494	22424	14307	16240	37790	25224	52893	18460	96731	28130	19972	44381	26258	42494	30936.9	22423.4			14590	31406	60403	77929	50143	3836	16478	31687	44331	85854	45254	62696	43717.2	25416.1		1.41311	0.177601	iminodiacetic acid
281268	448141	174	281268	96:8.0 98:8.0 100:201.0 101:307.0 102:175.0 103:6854.0 104:185.0 110:187.0 111:1.0 114:211.0 116:2095.0 117:192.0 121:2.0 122:1.0 123:4.0 124:1070.0 129:383.0 131:22.0 142:4.0 143:2.0 144:55.0 146:3197.0 147:1928.0 148:206.0 158:126.0 160:521.0 168:7.0 16			2172	2581	502	337	539	705	557	2584	323	1115	467	707	1363	575	1724	1083.4	807.965			951	1018	843	2062	1304	3150	1836	1094	1533	2088	1269	1582	1560.83	652.434		1.44068	0.109836	281268
217893	708324	223	217893	85:202.0 86:67.0 87:639.0 88:61.0 89:168.0 91:456.0 93:501.0 94:28.0 95:237.0 96:129.0 97:171.0 98:30.0 99:53.0 100:88.0 101:296.0 102:5.0 103:1491.0 104:163.0 105:336.0 106:5.0 107:321.0 109:351.0 110:103.0 111:39.0 113:13.0 114:13.0 116:46.0 117:2151.0			384	496	845	380	316	470	425	366	309	351	435	335	424	434	978	463.2	191.548			361	448	351	393	1680	1392	542	751	377	422	1260	435	701	469.693		1.51339	0.0855202	217893
