# Supplementary material for: Improved Metabolic Health Alters Host Metabolism in Parallel with Changes in Systemic Xeno-Metabolites of Gut Origin
Source: PLoS One. 2014 Jan 8;9(1):e84260. doi: 10.1371/journal.pone.0084260 (PMC3885560; doi:10.1371/journal.pone.0084260)
Supplement: Table S2 — Pre- vs. Post-intervention area-under-the-curve (AUC) following an oral glucose tolerance test. (XLS) [file pone.0084260.s003.xls]

## Sheet: Supplemental Table 2
SUPPLEMENTAL TABLE 2 (AUCs following OGTT, difference from zero)
Pre- and Post- weight loss and fitness intervention, obese, hyperinsulinemic sedentary women
		pvalue <0.05
	red numbers	pvalue >0.05<0.1
	post				pre					1 = raw p-value < 0.05				1 = adjusted p-value < 0.05
	mean	stdev	p-value, AUC difference from zero	adjusted p.value	mean	stdev	p-value, AUC difference from zero	adjusted p.value		POST	PRE	BOTH		POST	PRE	BOTH
SORTED ON PRE-Intervention SIGNIFICANCE, AND THEN CHANGE in MAGNITUDE PRE-Intervention:
AUC_glucose	36363930	10158390	8.29564e-08	1.34389e-05	36223780	14242570	9.05545e-07	4.88994e-05		1	1	1		1	1	1
AUC_199777	4188350	1866845	8.59131e-06	0.000309287	5320259	2465605	4.99618e-06	0.000161876		1	1	1		1	1	1
AUC_hippuric acid	2769929	754154	6.35991e-08	1.34389e-05	2585378	567517	1.37051e-09	4.44045e-07		1	1	1		1	1	1
AUC_314770	1284556	526689	3.87361e-06	0.000222127	1209194	662266	2.60061e-05	0.000702165		1	1	1		1	1	1
AUC_199794	793095	372971	1.41905e-05	0.000383142	1124845	512949	4.23934e-06	0.000152616		1	1	1		1	1	1
AUC_pyruvic acid	685246	673046	0.00474066	0.0465446	777675	559846	0.00030498	0.00581256		1	1	1		1	1	1
AUC_UDP-glucuronic acid	426445	151008	9.20469e-07	9.94106e-05	599268	192564	1.01818e-07	1.64945e-05		1	1	1		1	1	1
AUC_199177	110151	204554	0.0890016	0.294503	158194	188636	0.0105902	0.100919			1
AUC_dihydro-3-coumaric acid	98662.5	258815	0.213469	0.465013	153556	204377	0.0189911	0.160209			1
AUC_levoglucosan	89990	46141.6	3.13201e-05	0.000780593	121324	42782.3	2.81529e-07	2.28038e-05		1	1	1		1	1	1
AUC_307909	106214	81418.9	0.00087342	0.0128631	107635	126732	0.0098576	0.0967837		1	1	1		1
AUC_270003	63445	49750.4	0.00103253	0.013405	99126.9	60669.1	7.35355e-05	0.00170182		1	1	1		1	1	1
AUC_228147	90646.2	42508.6	1.38241e-05	0.000383142	80082.7	60916.7	0.000480297	0.0074103		1	1	1		1	1	1
AUC_204157	45478.8	265627	0.56511	0.816513	70398.5	111411	0.0418076	0.276442			1
AUC_fructose	21845	118736	0.536952	0.812033	51013.8	55859.5	0.00642613	0.0671634			1
AUC_281216	79267.5	57856.7	0.000603524	0.0102917	47981.5	64801.3	0.0204222	0.162381		1	1	1		1
AUC_glucose-1-phosphate	72967.5	87799.3	0.0150004	0.0810019	43796.5	31906.3	0.000336829	0.00606293		1	1	1			1
AUC_228528	37978.8	46828.9	0.0169861	0.087357	42306.9	31833	0.000439574	0.00726377		1	1	1			1
AUC_5-hydroxymethyl-2-furoic acid	46341.2	20563.9	8.23874e-06	0.000309287	40241.5	14957.4	4.96962e-07	3.22032e-05		1	1	1		1	1	1
AUC_gluconic acid	32500	14835.1	1.07472e-05	0.000348209	29438.1	20880.2	0.000269171	0.00545071		1	1	1		1	1	1
AUC_217893	11881.2	63101.9	0.527638	0.807177	29274.2	28692.6	0.00315665	0.0409101			1				1
AUC_alphaketoglutaric acid	46476.2	37039.1	0.00116171	0.0139406	19182.7	26774.6	0.023956	0.17746		1	1	1		1
AUC_Insulin	13341.8	7536.24	7.38665e-05	0.00159552	16370.2	7066.17	2.41004e-06	0.00011155		1	1	1		1	1	1
AUC_295002	2390	15000.2	0.592026	0.830375	15647.3	16957.8	0.00603241	0.0671634			1
AUC_kynurenine	13156.2	17425.5	0.0240254	0.116182	14858.1	16073	0.0059646	0.0671634		1	1	1
AUC_arabinose	14858.8	15624.3	0.00714899	0.0579068	14378.1	20093.7	0.0240995	0.17746		1	1	1
AUC_2,5-furandicarboxylic acid	10606.2	4569.25	6.22246e-06	0.000288011	11802.7	10556.3	0.00166544	0.0245274		1	1	1		1	1	1
AUC_Glucose (clinical)	6216.25	2556.8	3.99286e-06	0.000222127	7415.77	2531.84	1.9802e-07	2.13862e-05		1	1	1		1	1	1
AUC_N-acetylglycine	-3668.75	16399.6	0.454703	0.736619	-12288.5	17961.4	0.0296686	0.20897			1
AUC_isolinoleic acid	-5752.5	12045.5	0.126283	0.360285	-15686.5	17117.3	0.0062918	0.0671634			1
AUC_glutaminedehydrated	-18365	58499.6	0.300071	0.566513	-26087.3	36038.2	0.0228022	0.175903			1
AUC_aspartic acid	635	35450.6	0.951636	0.982432	-27741.9	37036.7	0.0192845	0.160209			1
AUC_gamma-tocopherol	-10447.5	62859.6	0.576375	0.819665	-40620	44977.2	0.00687614	0.0696209			1
AUC_2-deoxytetronic acid	-26280	69386.1	0.21623	0.467057	-64515	106193	0.0489675	0.305105			1
AUC_threonic acid	-200860	159731	0.00114378	0.0139406	-107294	155315	0.028392	0.204423		1	1	1		1
AUC_myristic acid	-102328	76268.1	0.000707699	0.0109188	-120596	76669.9	0.000103727	0.0022405		1	1	1		1	1	1
AUC_capric acid	-177570	215640	0.0157254	0.083525	-153370	239851	0.0397965	0.268627		1	1	1
AUC_glutamineminor	8822.5	277001	0.914133	0.977489	-233586	287250	0.0125581	0.116252			1
AUC_linoleic acid	-207231	139052	0.000312064	0.00561715	-248646	146765	5.26797e-05	0.00131294		1	1	1		1	1	1
AUC_palmitoleic acid	-441451	341213	0.00092872	0.0130828	-573759	259746	3.93554e-06	0.000152616		1	1	1		1	1	1
AUC_phenylalanine	-905831	373729	4.11345e-06	0.000222127	-852915	863543	0.00391537	0.0487915		1	1	1		1	1	1
AUC_oleic acid	-713026	559254	0.00103434	0.013405	-883351	441319	1.06173e-05	0.000312727		1	1	1		1	1	1
AUC_threonine	-1344669	1263590	0.00358573	0.0374767	-1275471	1955723	0.0366164	0.25242		1	1	1		1
AUC_palmitic acid	-962058	849747	0.00238483	0.0275959	-1447910	1092104	0.000448381	0.00726377		1	1	1		1	1	1
AUC_3-hydroxybutanoic acid	-1619105	1204116	0.000695999	0.0109188	-1719965	2739150	0.0429006	0.277996		1	1	1		1
AUC_tryptophan	-1742540	2359676	0.0266075	0.123317	-1857645	2390328	0.0159832	0.139961		1	1	1
AUC_tyrosine	-2449555	1616799	0.000273286	0.00520851	-2098584	3427152	0.0474654	0.301545		1	1	1		1
AUC_glycerol	-2449213	2553621	0.00680148	0.0565046	-2109942	2001088	0.00252207	0.034048		1	1	1			1
AUC_213253	-2033573	1298507	0.000208565	0.00422344	-2275895	2407155	0.00518335	0.0622002		1	1	1		1
AUC_isoleucine	-3333486	1731639	3.52194e-05	0.000815077	-2809245	2542087	0.00181164	0.0255204		1	1	1		1	1	1
AUC_leucine	-4178279	4706613	0.0105606	0.0698291	-3698223	4724024	0.0153849	0.138464		1	1	1
AUC_stearic acid	-1219080	5825845	0.483662	0.764423	-5002637	6764733	0.0205482	0.162381			1
										14	METABOLITES THAT ARE ONLY SIGNIFICANTLY OGTT-RESPONSIVE IN PRE-INTERVENTION
										38	METABOLITES THAT ARE SIGNIFICANTLY OGTT-RESPONSIVE IN BOTH PRE- AND POST-
										43	METABOLITES THAT ARE ONLY SIGNIFICANTLY OGTT-RESPONSIVE IN POST-INTERVENTION
										95	TOTAL NUMBER OF METABOLITES SIGNIFICANTLY CHANGED BY OGTT under any condition
SORTED ON POST-Intervention SIGNIFICANCE, AND THEN CHANGE in MAGNITUDE POST-Intervention:
AUC_lactic acid	5664190	6735745	0.0141127	0.0788911	2173079	10785820	0.481505	0.840198		1
AUC_226842	1332983	1464585	0.00919568	0.0651774	-914499	2708479	0.246855	0.686378		1
AUC_1,5-anhydroglucitol	918888	1132989	0.0169841	0.087357	503226	2782885	0.5267	0.842478		1
AUC_206309	403595	435062	0.00825317	0.0621867	-1677522	9152996	0.521219	0.842478		1
AUC_226848	398134	372253	0.00347161	0.0374767	-49021.2	676516	0.79832	0.945743		1				1
AUC_226922	321669	420996	0.0227157	0.111513	-9401.54	695982	0.961956	0.983198		1
AUC_199802	319899	333336	0.00677755	0.0565046	227620	405954	0.0660928	0.356901		1
AUC_226876	256922	393352	0.0448854	0.181786	104450	767205	0.632372	0.878755		1
AUC_241882	143156	145274	0.00578818	0.053582	-76141.1	323011	0.412011	0.794593		1
AUC_299159	136741	146568	0.00798889	0.0621867	-127430	402302	0.275705	0.689165		1
AUC_401721	116546	130633	0.0102758	0.0698291	-142291	518313	0.3418	0.750457		1
AUC_arachidic acid	102082	154432	0.0427893	0.17774	-84808.9	226597	0.2021	0.654473		1
AUC_337286	86780	101098	0.0126661	0.0788911	-53397.7	359277	0.601835	0.85524		1
AUC_226860	82263.8	84026.2	0.00601953	0.0537142	24159.2	164860	0.606874	0.858634		1
AUC_hydroxylamine	79440	87181.7	0.00913591	0.0651774	-52639.6	348904	0.596421	0.855047		1
AUC_propane-1,2,3-tricarboxylate	62631.2	70332.3	0.010382	0.0698291	-31407.7	102375	0.290345	0.702027		1
AUC_294988	57923.8	84787.9	0.0373798	0.157287	-15831.9	104469	0.5948	0.855047		1
AUC_340252	53992.5	78503.9	0.0363402	0.154924	-21109.6	116407	0.525544	0.842478		1
AUC_299218	51695	61482.9	0.0141225	0.0788911	-3917.31	113365	0.902912	0.962014		1
AUC_239873	40663.8	55510.7	0.0275981	0.12594	-23254.6	97250.5	0.405498	0.786715		1
AUC_339431	38873.8	38667.2	0.00512486	0.0488369	-18240	81097	0.433187	0.806624		1				1
AUC_294986	37630	54466.4	0.035653	0.154021	14807.3	77766.3	0.505432	0.842478		1
AUC_425495	35962.5	51994	0.0354827	0.154021	-13768.9	78509.8	0.539032	0.842478		1
AUC_235972	35242.5	54560.1	0.046898	0.187592	-32509.6	69715	0.118515	0.491937		1
AUC_alloxanoic acid	33945	40738.2	0.0147995	0.0810019	-25389.2	114054	0.4378	0.807654		1
AUC_propane-1,3-diol	25093.8	31151.9	0.017573	0.0889634	27945	55455.7	0.0942766	0.436366		1
AUC_288808	17945	20372.5	0.0110212	0.0714176	6094.61	35265.3	0.544868	0.842478		1
AUC_maltose	15442.5	16986.1	0.00925358	0.0651774	3340.39	40171.3	0.769449	0.944324		1
AUC_arabitol	9297.5	14144.4	0.043763	0.179484	256.154	32562.3	0.977839	0.990062		1
AUC_threitol	7918.75	10590.2	0.025127	0.119723	972.692	16636.5	0.836575	0.950377		1
AUC_2,3-dihydroxybutanoic acid	-7393.75	8666.4	0.0130824	0.0788911	-4846.15	22778.5	0.457858	0.828749		1
AUC_225548	-16005	14299	0.00257484	0.0287672	-12542.3	42743.9	0.3109	0.732627		1				1
AUC_inositolallo-	-22256.2	26439.9	0.0140383	0.0788911	-32596.2	102536	0.274055	0.689165		1
AUC_213961	-24683.8	29109.1	0.0135087	0.0788911	-4633.85	29203.5	0.577809	0.850955		1
AUC_280564	-26562.5	31529.7	0.0139783	0.0788911	549.231	63997.1	0.975823	0.990062		1
AUC_methionine	-223905	288040	0.0209249	0.104303	-168994	323214	0.0838459	0.405464		1
AUC_N-methylalanine	-439345	500874	0.0112756	0.071633	-63672.7	534644	0.675242	0.907794		1
AUC_histidine	-515508	721363	0.0308163	0.138648	901550	2021324	0.13378	0.532165		1
AUC_serine	-1165275	1131698	0.00441918	0.0447442	-859328	1642907	0.0837411	0.405464		1				1
AUC_glycine	-2439291	2499405	0.00613403	0.0537142	-1412634	3638099	0.186834	0.643981		1
AUC_phosphoric acid	-3186786	3422292	0.00807649	0.0621867	-2296374	4849594	0.113485	0.490255		1
AUC_alanine	-3613908	4895222	0.0266426	0.123317	895868	9644789	0.743478	0.936031		1
AUC_valine	-5194658	7291597	0.0312385	0.138648	-2834435	7047150	0.172636	0.628474		1
AUC_219021	24485480	62215110	0.200028	0.456403	-19766910	75579410	0.364285	0.761473
AUC_urea	4194645	13276270	0.297129	0.566513	-1803452	37223830	0.86424	0.950513
AUC_202571	2012846	13223180	0.60845	0.831805	4889662	14330750	0.242188	0.686378
AUC_citric acid	785791	1660337	0.129374	0.364497	85992.7	2347447	0.89711	0.962014
AUC_232087	753770	1672360	0.146733	0.39406	87970.4	2343384	0.894578	0.962014
AUC_285340	724445	1720917	0.172722	0.411944	44690.8	1522782	0.917477	0.962014
AUC_oxoproline	599461	2947251	0.495715	0.772171	-2499846	5358934	0.118401	0.491937
AUC_mannitol	483105	1072863	0.147081	0.39406	474287	842530	0.0651651	0.356901
AUC_199773	472885	1408100	0.2693	0.548762	55413.5	1875192	0.916909	0.962014
AUC_204344	421929	1983622	0.476644	0.762127	-70496.5	3135190	0.93672	0.975591
AUC_lysine	339939	1025126	0.275038	0.550076	-80061.9	2107154	0.893307	0.962014
AUC_226843	317112	1414710	0.453832	0.736619	353905	795833	0.13483	0.532165
AUC_cystine	298310	521391	0.0730244	0.262888	45617.3	747532	0.82955	0.950377
AUC_213972	264664	5759921	0.876418	0.952884	-1287970	5324785	0.400257	0.783679
AUC_2-hydroxybutanoic acid	246681	1392400	0.551887	0.816513	-326804	3473384	0.740293	0.936031
AUC_288810	199251	512208	0.204903	0.464256	-109302	628946	0.542663	0.842478
AUC_inositolmyo-	176169	412035	0.166646	0.411944	-8728.85	621607	0.960453	0.983198
AUC_dithiothreitol	167152	1604367	0.725002	0.870842	-559234	2023296	0.338647	0.750457
AUC_nicotinic acid	165980	614452	0.369492	0.654183	-76902.7	603934	0.654355	0.890803
AUC_uric acid	131605	709876	0.533889	0.812033	-777745	1760314	0.137142	0.532165
AUC_272849	126392	2449967	0.861414	0.939825	-849050	4529744	0.511969	0.842478
AUC_300379	116308	295028	0.199327	0.456403	-182970	658706	0.336343	0.750457
AUC_416137	112941	183689	0.0565894	0.215706	27995.8	290079	0.733887	0.936031
AUC_parabanic acid	102564	184652	0.0805877	0.274245	-123812	391578	0.276517	0.689165
AUC_216428	100118	271253	0.227364	0.487854	21773.1	350174	0.826385	0.950377
AUC_240265	85116.2	143204	0.0639806	0.235565	34723.8	185419	0.512338	0.842478
AUC_236890	73410	181577	0.188933	0.437244	77635.4	211015	0.209355	0.656327
AUC_303091	68522.5	179911	0.213848	0.465013	-44333.1	247657	0.530797	0.842478
AUC_234717	68045	217209	0.301045	0.566513	-40459.6	265089	0.592208	0.855047
AUC_199596	66227.5	112825	0.0668592	0.243398	-18072.7	319573	0.841846	0.950377
AUC_226844	63471.2	112941	0.0775412	0.270144	19618.8	185893	0.710207	0.927851
AUC_305055	60866.2	2729616	0.939816	0.982432	134530	2661828	0.858447	0.950513
AUC_GABA	57211.2	127271	0.147711	0.39406	-73828.9	292213	0.380253	0.775074
AUC_229268	51802.5	91964.7	0.0769493	0.270144	-26886.9	141745	0.507019	0.842478
AUC_222169	48908.8	305806	0.590645	0.830375	13291.1	274316	0.864231	0.950513
AUC_200448	40642.5	395196	0.72839	0.870842	-137552	432931	0.274306	0.689165
AUC_oleamide	38657.5	167758	0.441618	0.732498	-59055	202778	0.314387	0.732815
AUC_425281	35710	82470.5	0.161766	0.406297	-9444.23	94121.9	0.723805	0.936031
AUC_fumaric acid	35506.2	118781	0.322667	0.594001	-40186.2	112812	0.223252	0.676017
AUC_maleimide	33872.5	105027	0.287712	0.564961	-17907.7	105634	0.552448	0.842478
AUC_372993	33790	67987.5	0.113093	0.353331	-24736.2	117583	0.462785	0.833013
AUC_224551	29495	161080	0.538849	0.812033	-155915	806857	0.499249	0.842478
AUC_4-hydroxybenzoate	28602.5	60732.7	0.131068	0.366087	-67285.4	203538	0.256333	0.686378
AUC_200464	28413.8	163380	0.55909	0.816513	-82865.8	222415	0.204018	0.654473
AUC_glyoxalurea	26135	58761.9	0.15165	0.39406	-21979.6	90063	0.39618	0.783679
AUC_269625	23006.2	43575.7	0.0946287	0.309694	-18477.7	80590.7	0.424554	0.801141
AUC_214535	22900	60099.6	0.213663	0.465013	7209.23	81107.1	0.754116	0.9363
AUC_226910	21945	69658.3	0.298458	0.566513	12660	75156.4	0.554937	0.842478
AUC_asparagine	21512.5	379455	0.847885	0.937593	-108904	469802	0.419603	0.799714
AUC_behenic acid	19536.2	39553.7	0.115101	0.353331	-27546.9	82165	0.250016	0.686378
AUC_220259	17801.2	79244.1	0.452883	0.736619	-27319.6	72520.9	0.199369	0.654473
AUC_adipic acid	17765	31379.8	0.0756685	0.269413	-4667.31	69012.2	0.811471	0.945743
AUC_226907	17497.5	36691.1	0.126767	0.360285	-3471.92	38634.7	0.751505	0.9363
AUC_339455	16197.5	81420.4	0.505014	0.782893	-47540.8	113158	0.155715	0.590106
AUC_356954	15388.8	27505.6	0.0786974	0.271255	-21761.5	65303.3	0.252732	0.686378
AUC_212022	15042.5	57842.8	0.386957	0.674054	-49974.2	149084	0.25009	0.686378
AUC_conduritol-beta-epoxide	14308.8	34015.1	0.173008	0.411944	14493.5	39891.3	0.214724	0.656327
AUC_226846	13853.8	73671.6	0.528153	0.807177	-16471.2	81911.1	0.482336	0.840198
AUC_methanolphosphate	13063.8	107353	0.681476	0.864184	2908.85	84548.8	0.903332	0.962014
AUC_phenol	13036.2	174436	0.800504	0.919728	84613.9	182763	0.120924	0.491937
AUC_232946	12910	39182.1	0.277952	0.552494	-37757.3	71712	0.0819551	0.405464
AUC_2-phenylpropanol	12583.8	32983.6	0.213126	0.465013	-7745.77	43856.2	0.536212	0.842478
AUC_salicylaldehyde	12371.2	32429	0.213158	0.465013	-23595	60006.5	0.181711	0.641244
AUC_fucose..rhamnose	12310	52089.8	0.430367	0.726245	-14545.4	70559.6	0.471626	0.837853
AUC_408490	11836.2	216073	0.852953	0.939825	27396.9	345658	0.779922	0.945743
AUC_phytol	10796.2	45270.7	0.426289	0.726245	-2566.15	43608.6	0.835536	0.950377
AUC_281363	10698.8	36894.4	0.336709	0.612886	17004.2	67904.4	0.384354	0.775779
AUC_369638	10685	40264.4	0.377672	0.66503	-15574.6	39853.7	0.184209	0.641762
AUC_268313	10650	94842.2	0.704708	0.870842	-11638.9	335749	0.902603	0.962014
AUC_299211	10010	15783.3	0.0503509	0.198948	-20064.2	52069.7	0.18997	0.647898
AUC_dodecane	9961.25	16070.2	0.0549089	0.211791	-8078.08	47198.6	0.548704	0.842478
AUC_295046	9955	23736	0.174186	0.411944	-9811.15	36319.3	0.349288	0.750457
AUC_425155	9668.75	73896.9	0.659181	0.85295	-2456.54	81489.6	0.915244	0.962014
AUC_199215	9555	68443	0.638148	0.847377	-21865.4	102718	0.457614	0.828749
AUC_226903	9497.5	126986	0.800353	0.919728	49141.2	125090	0.182082	0.641244
AUC_malic acid	9312.5	33262.9	0.352972	0.628367	3552.69	12819.8	0.337424	0.750457
AUC_hydroxycarbamate	9243.75	71062.2	0.661024	0.85295	-5795.77	87735.8	0.81576	0.947334
AUC_pseudouridine	8798.75	67113.9	0.658551	0.85295	-18905.8	78376.5	0.401515	0.783679
AUC_213182	8746.25	17853.9	0.117777	0.353331	-11221.1	68702.4	0.566853	0.842478
AUC_356938	8642.5	49216.6	0.55534	0.816513	4390.39	76798.5	0.840152	0.950377
AUC_206556	7623.75	25052.4	0.31441	0.582107	15490.4	48915.2	0.275809	0.689165
AUC_trihydroxypyrazine	7472.5	17650.6	0.170496	0.411944	-5390.77	28915.1	0.514192	0.842478
AUC_299130	7117.5	108936	0.825094	0.931763	-25876.2	95884.9	0.34975	0.750457
AUC_225427	7036.25	44670	0.596196	0.831805	-15094.6	70617.8	0.455797	0.828749
AUC_cerotic acid	6988.75	26514.4	0.380778	0.666876	-14728.9	56186.6	0.363218	0.761473
AUC_226864	6983.75	78547.9	0.763839	0.899941	2158.85	63038.4	0.903773	0.962014
AUC_uridine	6817.5	15556.8	0.157198	0.40104	-94.6154	18217	0.985367	0.992543
AUC_339490	6621.25	46201.7	0.629351	0.847377	4029.23	35842	0.692373	0.922457
AUC_231850	6578.75	62213.1	0.72108	0.870842	-3513.46	44366.9	0.780109	0.945743
AUC_salicylic acid	6358.75	27526	0.440514	0.732498	2788.85	49190.5	0.841454	0.950377
AUC_2-hydroxyglutaric acid	6335	17426.3	0.233986	0.4955	-5266.15	28420	0.516714	0.842478
AUC_xylitol	6212.5	15027.7	0.17992	0.422421	-2138.08	22503.6	0.737852	0.936031
AUC_225555	6003.75	19005.6	0.297212	0.566513	-4542.69	27709.9	0.565431	0.842478
AUC_268312	5641.25	68816.9	0.781708	0.917657	-6859.62	57402.2	0.674203	0.907794
AUC_212279	5512.5	48341.1	0.700378	0.870842	-21678.5	57801.5	0.201226	0.654473
AUC_223521	5480	38516.6	0.631803	0.847377	-8445	33432.9	0.380361	0.775074
AUC_226927	5398.75	39452.6	0.644747	0.852645	22843.8	42320.8	0.0754256	0.381842
AUC_240432	4721.25	14201.7	0.273896	0.550076	-1543.85	19722.1	0.782567	0.945743
AUC_cystineminor	4690	14850.5	0.297328	0.566513	3373.85	34378.5	0.729596	0.936031
AUC_281148	4648.75	10697.2	0.160381	0.405964	3941.54	24603.5	0.574202	0.849504
AUC_isocitric acid	4535	26620.4	0.567023	0.816513	-5666.54	30003.7	0.50883	0.842478
AUC_stigmasterol	4450	9968.82	0.15029	0.39406	-8375.77	14393.8	0.0577418	0.334078
AUC_203761	3526.25	48212.4	0.80466	0.921236	-5406.92	32971.5	0.565314	0.842478
AUC_5-methoxytryptamine	3168.75	6424.98	0.115577	0.353331	-8105.77	24435	0.254772	0.686378
AUC_lignoceric acid	3152.5	41490.9	0.797258	0.919728	-22765.4	68645.5	0.254895	0.686378
AUC_309540	3056.25	34254.9	0.763043	0.899941	-20423.1	77008.6	0.357833	0.761473
AUC_226923	2988.75	92682.5	0.913068	0.977489	-27701.5	124699	0.438726	0.807654
AUC_204425	2808.75	27194	0.72727	0.870842	-7764.23	27394.9	0.326997	0.746106
AUC_223505	2803.75	6517.92	0.164298	0.409482	3151.15	28538.5	0.697537	0.922457
AUC_226851	2501.25	38341.6	0.825358	0.931763	11086.1	82021.9	0.634806	0.878755
AUC_201887	2167.5	16789.7	0.663405	0.85295	-3313.85	19999	0.561318	0.842478
AUC_223548	2108.75	10204.6	0.489003	0.769111	-2360.77	11348.4	0.467676	0.837165
AUC_glutaric acid	1990	6943.54	0.342144	0.619299	-349.615	11335.7	0.913294	0.962014
AUC_238320	1898.75	98206.6	0.947803	0.982432	-28419.2	98968.4	0.32092	0.737433
AUC_300865	1846.25	12056.9	0.606341	0.831805	-2283.46	44398.4	0.855983	0.950513
AUC_210904	1835	77651.8	0.936228	0.982432	-10862.3	82386.6	0.643055	0.879522
AUC_242417	1818.75	19172.6	0.74862	0.891738	-5555.77	41421.2	0.637369	0.878755
AUC_281108	1776.25	182448	0.9737	0.988962	120504	260705	0.121466	0.491937
AUC_267884	1455	106864	0.963227	0.986611	8570.77	115820	0.794143	0.945743
AUC_montanic acid	1351.25	23445.3	0.845396	0.937593	-17964.2	65974.2	0.345597	0.750457
AUC_monopalmitin-1-glyceride	965	3426.04	0.350173	0.626829	-2131.15	11672.4	0.522772	0.842478
AUC_taurine	946.25	73643.2	0.965295	0.986611	-22497.7	69585.5	0.266379	0.689165
AUC_beta-alanine	647.5	8534.13	0.797541	0.919728	-1591.15	21640.6	0.795429	0.945743
AUC_glucuronic acid	520	10049.3	0.861001	0.939825	4600.39	38030.3	0.670471	0.907794
AUC_300920	162.5	31214.3	0.985935	0.995149	-7224.23	105354	0.808905	0.945743
AUC_408701	40	31804.4	0.996602	0.999687	-295.385	61263.5	0.986416	0.992543
AUC_octadecanol	-76.25	33446.4	0.99384	0.999687	2251.15	41727.5	0.849027	0.950513
AUC_aconitic acid	-243.75	17681.8	0.962768	0.986611	-1221.92	14238	0.762299	0.93952
AUC_cysteine-glycine	-327.5	14933.1	0.940806	0.982432	-5170.38	20424.3	0.379351	0.775074
AUC_glycocyamine	-490	11386	0.88419	0.954925	-688.846	14345.8	0.865436	0.950513
AUC_281187	-676.25	68456.8	0.973315	0.988962	33019.6	170524	0.49838	0.842478
AUC_271416	-712.5	40171	0.95211	0.982432	10569.2	33022.9	0.270972	0.689165
AUC_ribitol	-890	14135.5	0.831339	0.933473	1550.77	16003.7	0.732859	0.936031
AUC_239966	-955	13842.7	0.815511	0.927107	-4791.92	16242.3	0.308385	0.732627
AUC_glycerol-alpha-phosphate	-981.25	25571	0.896649	0.965164	-563.077	18138.7	0.912732	0.962014
AUC_199203	-1058.75	148554	0.980745	0.993005	226883	682020	0.253506	0.686378
AUC_azelaic acid	-1322.5	8594.32	0.604596	0.831805	-6032.31	18534	0.263358	0.689165
AUC_tocopherolbeta	-1527.5	11996.1	0.667688	0.855063	-4284.23	13803.8	0.285021	0.702027
AUC_350532	-1542.5	9896.32	0.600001	0.831805	-4437.69	13026.3	0.242878	0.686378
AUC_359447	-1543.75	25607.8	0.838397	0.933473	2117.31	23833.3	0.754241	0.9363
AUC_213960	-1848.75	41442.5	0.879988	0.953565	-1444.62	70680.1	0.942469	0.975591
AUC_322652	-2003.75	73500.7	0.92646	0.982432	9785.77	106162	0.745358	0.936031
AUC_419574	-2090	19157.5	0.712682	0.870842	6042.69	18030.5	0.250184	0.686378
AUC_354038	-2722.5	15955.4	0.56641	0.816513	-6901.15	33944.6	0.477615	0.840198
AUC_glycolic acid	-3085	40257	0.795562	0.919728	-13168.9	86741.3	0.594148	0.855047
AUC_235373	-3391.25	174753	0.94761	0.982432	-33717.7	139752	0.401419	0.783679
AUC_2,3,5-trihydroxypyrazine	-3396.25	24196.7	0.636351	0.847377	-2250	15989.4	0.621093	0.871144
AUC_adenosine-5-phosphate	-3743.75	11238.3	0.272967	0.550076	-130.385	7819.81	0.953052	0.98193
AUC_ornithine	-3927.5	146086	0.927473	0.982432	-59314.6	121747	0.104446	0.457305
AUC_225539	-4626.25	13308.1	0.253778	0.533922	-1592.31	22242.7	0.800692	0.945743
AUC_367932	-4760	227275	0.943465	0.982432	-49682.3	790148	0.824468	0.950377
AUC_200906	-4920	22769.5	0.469851	0.757371	-4644.23	41388.5	0.692904	0.922457
AUC_lathosterol	-5255	9484.94	0.0812578	0.274245	-4215	11290.2	0.203159	0.654473
AUC_225396	-6046.25	35004.5	0.561727	0.816513	-12237.7	46483.6	0.36123	0.761473
AUC_isothreonic acid	-6323.75	35954.6	0.554719	0.816513	-20503.8	48922.2	0.156633	0.590106
AUC_hydrocinnamic acid	-6838.75	33399.4	0.4929	0.771496	-11596.1	29173	0.177338	0.638418
AUC_267805	-7071.25	14688.3	0.123562	0.360285	-3926.54	27414.5	0.614946	0.866272
AUC_227352	-7490	45315.9	0.578456	0.819665	14816.5	95936.9	0.58787	0.855047
AUC_2-deoxyerythritol	-7925	21751.1	0.233001	0.4955	-6051.92	73867.4	0.772736	0.944779
AUC_pyrophosphate	-8157.5	398949	0.944803	0.982432	-321015	652159	0.101283	0.457305
AUC_xylose	-8472.5	29043.3	0.333946	0.611291	-8079.23	48182.8	0.556721	0.842478
AUC_indole-3-lactate	-8628.75	40688.1	0.477932	0.762127	-6692.31	32584.9	0.473232	0.837853
AUC_402237	-9893.75	83608.5	0.689733	0.86832	-43370.8	71924.8	0.0504189	0.308221
AUC_217882	-10268.8	29653.9	0.255506	0.53409	-8584.61	77057.3	0.694982	0.922457
AUC_erythritol	-11445	27981.5	0.184209	0.429379	-26733.5	72195.1	0.206614	0.656303
AUC_218787	-11651.2	75121.2	0.601773	0.831805	-40587.7	111645	0.214467	0.656327
AUC_309642	-12293.8	86374.9	0.631675	0.847377	-63496.2	114468	0.0686526	0.364647
AUC_281112	-13597.5	222750	0.836394	0.933473	-3576.92	87349.6	0.885074	0.962014
AUC_241087	-14441.2	29600.2	0.119124	0.35349	7131.92	41265.9	0.544853	0.842478
AUC_223973	-15328.8	60133.4	0.396102	0.682644	-1011.92	48771.4	0.941599	0.975591
AUC_235678	-15647.5	109144	0.629221	0.847377	-6551.54	76451.2	0.762635	0.93952
AUC_213697	-15917.5	88747.2	0.547053	0.816513	-37025.8	120128	0.288207	0.702027
AUC_288822	-16013.8	132186	0.682812	0.864184	-1685.77	169042	0.971908	0.990062
AUC_glycerol-3-galactoside	-16301.2	33271	0.117726	0.353331	-4024.61	23069	0.541124	0.842478
AUC_223513	-16950	85894.1	0.508376	0.784352	-21717.7	159745	0.632845	0.878755
AUC_sucrose	-17461.2	55914.2	0.30249	0.566513	-13896.9	36356.7	0.193302	0.652395
AUC_succinic acid	-18261.2	53509.1	0.262049	0.540788	-23108.1	83632.7	0.338804	0.750457
AUC_indole-3-acetate	-20292.5	40492.2	0.110447	0.353331	-8154.23	45565.7	0.530919	0.842478
AUC_2-hydroxyvaleric acid	-22463.8	70755.7	0.294908	0.566513	-36662.3	83171.5	0.137969	0.532165
AUC_2-ketoisocaproic acid	-23122.5	374680	0.83463	0.933473	-98073.5	387053	0.378922	0.775074
AUC_cysteine	-23242.5	137848	0.570948	0.818528	47396.5	207062	0.425297	0.801141
AUC_201042	-24082.5	100901	0.425928	0.726245	9915	139104	0.801537	0.945743
AUC_281268	-25166.2	48513.1	0.0998129	0.323394	36145.4	71289.5	0.0924883	0.434293
AUC_199239	-25167.5	177805	0.633536	0.847377	-3743.08	232437	0.954655	0.98193
AUC_citrulline	-25570	82634.4	0.306713	0.57112	-59031.9	107521	0.071161	0.371873
AUC_ethanolamine	-27471.2	206007	0.653124	0.85295	-101668	312115	0.262989	0.689165
AUC_415158	-27676.2	359476	0.794631	0.919728	64068.5	605313	0.709412	0.927851
AUC_268365	-28171.2	86021.1	0.280716	0.554585	-10133.1	76925.5	0.643354	0.879522
AUC_trans-4-hydroxyproline	-28823.8	65085.2	0.153246	0.39406	1510.38	29757.1	0.857848	0.950513
AUC_200624	-29057.5	65578.1	0.153046	0.39406	-49869.2	120180	0.160446	0.597522
AUC_289052	-29855	60849.8	0.117272	0.353331	-51946.2	91968.1	0.0643851	0.356901
AUC_aminomalonic acid	-32880	279490	0.69144	0.86832	-117189	343290	0.241967	0.686378
AUC_butylamine	-33705	119504	0.349558	0.626829	-59097.7	114651	0.0877881	0.418285
AUC_glutamic acid	-34001.2	659519	0.861506	0.939825	-167791	615133	0.344778	0.750457
AUC_419273	-34743.8	90732.7	0.211559	0.465013	-36969.2	105318	0.229665	0.685502
AUC_caprylic acid	-36231.2	105308	0.25841	0.536697	-63669.2	129779	0.102301	0.457305
AUC_272694	-41686.2	123510	0.267044	0.547609	-27895.4	123130	0.429934	0.805195
AUC_shikimic acid	-45370	199600	0.447677	0.736282	-61031.5	260347	0.414519	0.7947
AUC_226858	-47716.2	445365	0.71758	0.870842	-52005	343266	0.594909	0.855047
AUC_199609	-54352.5	478848	0.701686	0.870842	-20208.5	292591	0.807552	0.945743
AUC_408611	-57076.2	135168	0.171512	0.411944	-39336.9	130737	0.299298	0.718314
AUC_415114	-57960	640226	0.759686	0.899941	82170	331139	0.388544	0.777087
AUC_409031	-72383.8	1041774	0.814222	0.927107	165173	1744496	0.738719	0.936031
AUC_glyceric acid	-73760	288737	0.395127	0.682644	-191323	406187	0.115209	0.491152
AUC_methioninesulfoxide	-76918.8	334926	0.443116	0.732498	-88656.9	162568	0.0728272	0.37454
AUC_211972	-86342.5	798423	0.71507	0.870842	306407	874792	0.230617	0.685502
AUC_glutamic acid2	-87965	652840	0.64978	0.85295	-91389.2	552556	0.562032	0.842478
AUC_319168	-88311.2	847768	0.725044	0.870842	-214600	745248	0.319623	0.737433
AUC_methylhexadecanoic acid	-90016.2	147352	0.0579515	0.216128	-101976	171349	0.0530402	0.318241
AUC_223675	-90241.2	203073	0.15197	0.39406	-55350	313823	0.536767	0.842478
AUC_271050	-91441.2	877718	0.725015	0.870842	-237724	767891	0.286187	0.702027
AUC_glutaminedehydrated	-123848	586617	0.479857	0.762127	-319176	544835	0.0563103	0.331719
AUC_226841	-153584	656940	0.43519	0.730579	1832.31	685424	0.992468	0.995541
AUC_tocopherolalpha	-172336	410264	0.173568	0.411944	-97542.7	390492	0.385495	0.775779
AUC_arginine..ornithine	-175050	354762	0.115421	0.353331	-398850	817823	0.104128	0.457305
AUC_creatinine	-198665	369028	0.089078	0.294503	93168.5	623164	0.599703	0.85524
AUC_erythronic acid lactone	-213559	1295095	0.579331	0.819665	-765187	1336640	0.0613278	0.3486
AUC_270066	-218136	1763029	0.676482	0.862914	223761	3010859	0.793283	0.945743
AUC_425498	-228386	1307228	0.557316	0.816513	-106637	3620810	0.917188	0.962014
AUC_408731	-267044	2006939	0.653826	0.85295	242573	3505699	0.807207	0.945743
AUC_lauric acid	-332382	736514	0.146271	0.39406	-279287	765309	0.212828	0.656327
AUC_425836	-450696	1899761	0.428634	0.726245	-480209	1640591	0.312045	0.732627
AUC_pelargonic acid	-453826	950744	0.126445	0.360285	-595840	1452796	0.164969	0.607387
AUC_benzoic acid	-570932	5537760	0.727743	0.870842	554310	10566560	0.853142	0.950513
AUC_iminodiacetic acid	-961571	2160974	0.151474	0.39406	58338.5	2775885	0.940847	0.975591
AUC_proline	-1581613	2590029	0.0580343	0.216128	-397937	3649283	0.70109	0.923387
AUC_glutamine	-3283118	5263075	0.0536189	0.209308	1106391	11366950	0.731715	0.936031
AUC_cholesterol	-7981106	16402860	0.120012	0.35349	-3017285	18262260	0.562438	0.842478
