# Supplementary material for: Improved Metabolic Health Alters Host Metabolism in Parallel with Changes in Systemic Xeno-Metabolites of Gut Origin
Source: PLoS One. 2014 Jan 8;9(1):e84260. doi: 10.1371/journal.pone.0084260 (PMC3885560; doi:10.1371/journal.pone.0084260)
Supplement: Table S3 — Pre-intervention Spearman's correlation coefficient comparisons across analytes and phenotype variables. (XLS) [file pone.0084260.s004.xls]

## Sheet: Supplemental Table 3
SUPPLEMENTAL TABLE 3 ("Pre")
Spearmans correlations, overnight-fasted plasma metabolite concentrations & post-OGTT area-under-the-curve (AUC) values													r value > 0.5			p value <0.05; see pvalue matrix, bottom of worksheet
Pre- weight loss and fitness intervention, obese, hyperinsulinemic sedentary women													r value < 0.5
	199203	199777	199802	211972	213961	214535	217893	223505	223513	225427	225548	226851	228147	232087	235972	268365	281268	288808	299159	309642	402237	415114	1,5-anhydroglucitol	2,3,5-trihydroxypyrazine	2,5-furandicarboxylic acid	2-ketoisocaproic acid	5-hydroxymethyl-2-furoic acid	adenosine-5-phosphate	alphaketoglutaric acid	arginine..ornithine	aspartic acid	AUC_199773	AUC_199777	AUC_199794	AUC_211972	AUC_213961	AUC_226842	AUC_226848	AUC_232946	AUC_235972	AUC_241882	AUC_271416	AUC_281268	AUC_285340	AUC_295002	AUC_299159	AUC_299211	AUC_369638	AUC_4-hydroxybenzoate
199203	1	0.236264	-0.17033	0.258242	0.401099	0.0494506	0.384615	0.642857	0.571429	0.626374	0.153846	0.532967	0.258242	0.0824176	0.225275	-0.197802	-0.335165	-0.225275	0.0879121	-0.153846	0.0989011	-0.291209	-0.104396	0.043956	0.407715	0.324176	0.131868	0.175824	0.313187	-0.296703	0.335165	-0.258242	0.247253	0.137363	-0.291209	-0.302198	-0.115385	-0.241758	-0.0989011	-0.247253	-0.164835	-0.181319	0.307692	-0.368132	0.131868	-0.131868	-0.0384615	-0.120879	0.0384615
199777	0.236264	1	0.554945	0.214286	-0.274725	-0.137363	0.0494506	0.0934066	0.203297	0.252747	-0.252747	0.313187	0.659341	0.604396	0.0879121	-0.241758	0.17033	-0.186813	0.0274725	-0.379121	0.324176	-0.0714286	-0.0164835	0.203297	-0.396696	0.642857	-0.258242	-0.126374	0.186813	0.0384615	0.0494506	-0.615385	0.0659341	0.148352	-0.368132	-0.032967	-0.104396	-0.631868	-0.313187	-0.252747	-0.39011	-0.675824	-0.43956	-0.565934	0.313187	-0.225275	-0.362637	-0.357143	0.335165
199802	-0.17033	0.554945	1	-0.423077	-0.324176	0.241758	-0.521978	-0.428571	0.00549451	0.148352	-0.318681	0.115385	0.593407	0.434066	-0.362637	-0.587912	0.0604396	-0.478022	-0.10989	-0.417582	-0.17033	0.0659341	0.296703	-0.197802	-0.523418	0.324176	-0.543956	-0.384615	-0.417582	0.148352	-0.0384615	-0.368132	-0.181319	-0.159341	0.274725	0.10989	0.0879121	-0.39011	-0.00549451	0.241758	-0.00549451	-0.653846	-0.351648	-0.373626	0.225275	-0.043956	-0.192308	-0.302198	0.423077
211972	0.258242	0.214286	-0.423077	1	0.510989	-0.56044	0.692308	0.604396	0.104396	0.302198	0.362637	0.0824176	0.137363	0.346154	0.758242	0.39011	-0.0879121	0.307692	0.538462	0.17033	0.335165	0.043956	0.17033	0.642857	0.256199	0.0549451	0.32967	0.252747	0.637363	-0.456044	0.247253	-0.0604396	0.010989	0.0769231	-0.763736	-0.434066	-0.56044	-0.43956	-0.653846	-0.747253	-0.703297	-0.115385	0.137363	-0.0989011	0.203297	-0.351648	-0.565934	-0.351648	-0.153846
213961	0.401099	-0.274725	-0.324176	0.510989	1	0.120879	0.395604	0.615385	0.104396	0.395604	0.554945	0.115385	-0.104396	0.203297	0.401099	0.247253	-0.247253	-0.263736	0.241758	0.142857	0.0824176	0.0714286	0.137363	0.0714286	0.66116	0.0384615	0.467033	0.291209	0.412088	-0.620879	0.0714286	0.159341	0.0769231	-0.0164835	-0.478022	-0.769231	-0.186813	0	-0.137363	-0.258242	-0.247253	-0.0274725	0.258242	-0.159341	0.291209	0.043956	-0.296703	-0.324176	-0.043956
214535	0.0494506	-0.137363	0.241758	-0.56044	0.120879	1	-0.252747	-0.0769231	-0.0659341	0.192308	-0.230769	-0.021978	-0.0879121	-0.159341	-0.21978	-0.302198	0.0659341	-0.406593	-0.186813	-0.412088	0.010989	-0.181319	-0.291209	-0.417582	0.253444	0.296703	0.32967	-0.175824	-0.0934066	0.159341	-0.291209	-0.208791	0.0384615	-0.032967	0.362637	-0.153846	0.335165	0.258242	0.395604	0.417582	0.39011	-0.142857	-0.181319	-0.159341	-0.131868	0.186813	0.104396	-0.153846	0.247253
217893	0.384615	0.0494506	-0.521978	0.692308	0.395604	-0.252747	1	0.67033	0.010989	0.236264	0.368132	0	-0.269231	0.115385	0.708791	0.357143	0.153846	0.192308	0.450549	0.368132	0.478022	0.307692	-0.192308	0.5	0.352618	0.197802	0.412088	0.137363	0.736264	-0.296703	0.39011	0.302198	0.258242	0.335165	-0.5	-0.186813	-0.527473	-0.0659341	-0.489011	-0.796703	-0.516484	-0.043956	0	0.32967	-0.115385	-0.483516	-0.17033	0.120879	-0.291209
223505	0.642857	0.0934066	-0.428571	0.604396	0.615385	-0.0769231	0.67033	1	0.538462	0.527473	0.357143	0.516484	0.0164835	0.104396	0.549451	0.115385	-0.296703	0.0274725	0.230769	0.0659341	0.527473	-0.0824176	-0.137363	0.450549	0.586779	0.384615	0.582418	0.516484	0.747253	-0.60989	0.417582	-0.0494506	0.395604	0.296703	-0.708791	-0.527473	-0.214286	-0.0604396	-0.175824	-0.56044	-0.285714	-0.0274725	0.258242	-0.225275	0.0934066	-0.142857	-0.153846	-0.186813	-0.379121
223513	0.571429	0.203297	0.00549451	0.104396	0.104396	-0.0659341	0.010989	0.538462	1	0.648352	0.181319	0.912088	0.368132	0.17033	-0.0714286	-0.351648	-0.406593	-0.126374	-0.126374	-0.521978	0.0384615	-0.538462	-0.115385	0.0164835	-0.016529	0.17033	-0.032967	0.159341	0.230769	-0.137363	0.175824	-0.428571	0.21978	0.0164835	-0.21978	-0.104396	0.203297	-0.307692	0.115385	-0.0769231	0.203297	0.0989011	0.269231	-0.357143	0.230769	0.104396	0.197802	-0.0494506	-0.148352
225427	0.626374	0.252747	0.148352	0.302198	0.395604	0.192308	0.236264	0.527473	0.648352	1	0.120879	0.56044	0.395604	0.164835	0.225275	-0.412088	-0.313187	-0.258242	0.208791	-0.620879	0.181319	-0.291209	0.104396	0.175824	0.275483	0.291209	0.208791	0.0769231	0.335165	-0.115385	0.401099	-0.483516	0.0164835	-0.137363	-0.104396	-0.373626	-0.131868	-0.450549	-0.164835	-0.203297	-0.104396	-0.291209	0.192308	-0.335165	-0.0384615	-0.0989011	-0.269231	-0.412088	0.203297
225548	0.153846	-0.252747	-0.318681	0.362637	0.554945	-0.230769	0.368132	0.357143	0.181319	0.120879	1	0.335165	-0.313187	0.32967	0.032967	0.21978	0.137363	-0.384615	0.0549451	0.252747	0.192308	0.324176	-0.225275	-0.192308	0.0991739	0.10989	-0.0769231	0.0769231	0.565934	-0.318681	-0.10989	0.489011	0.0549451	-0.043956	-0.307692	-0.384615	0.148352	0.0384615	0	-0.104396	0.032967	0.39011	-0.0659341	0.164835	0.423077	0.0659341	0.236264	0.32967	-0.148352
226851	0.532967	0.313187	0.115385	0.0824176	0.115385	-0.021978	0	0.516484	0.912088	0.56044	0.335165	1	0.412088	0.379121	-0.0769231	-0.32967	-0.208791	-0.340659	-0.0934066	-0.445055	0.164835	-0.467033	-0.285714	0	-0.0523418	0.43956	-0.0879121	0.17033	0.340659	-0.274725	0.0934066	-0.406593	0.0494506	-0.131868	-0.274725	-0.0934066	0.318681	-0.373626	0.120879	-0.0384615	0.153846	0.0934066	0.0274725	-0.505495	0.401099	0.0604396	0.203297	-0.032967	-0.0714286
228147	0.258242	0.659341	0.593407	0.137363	-0.104396	-0.0879121	-0.269231	0.0164835	0.368132	0.395604	-0.313187	0.412088	1	0.489011	0.214286	-0.587912	-0.428571	0.00549451	0.384615	-0.43956	-0.230769	-0.494505	0.445055	0.285714	-0.336089	0.258242	-0.324176	-0.258242	-0.159341	-0.28022	0.0274725	-0.725275	-0.225275	-0.175824	-0.241758	-0.0659341	-0.307692	-0.846154	-0.489011	-0.21978	-0.478022	-0.648352	0.153846	-0.736264	0.467033	-0.406593	-0.60989	-0.714286	0.10989
232087	0.0824176	0.604396	0.434066	0.346154	0.203297	-0.159341	0.115385	0.104396	0.17033	0.164835	0.32967	0.379121	0.489011	1	0.142857	0.043956	0.291209	-0.445055	0.148352	-0.192308	-0.010989	-0.032967	-0.043956	0.021978	-0.40496	0.379121	-0.335165	-0.291209	0.208791	-0.258242	-0.269231	-0.28022	-0.208791	-0.142857	-0.445055	-0.137363	-0.0714286	-0.686813	-0.373626	-0.318681	-0.395604	-0.395604	-0.489011	-0.401099	0.763736	-0.214286	-0.285714	-0.241758	0.302198
235972	0.225275	0.0879121	-0.362637	0.758242	0.401099	-0.21978	0.708791	0.549451	-0.0714286	0.225275	0.032967	-0.0769231	0.214286	0.142857	1	0.148352	-0.230769	0.505495	0.862637	0.285714	0.208791	-0.0769231	0.21978	0.824176	0.349864	0.0824176	0.489011	0.0714286	0.494505	-0.598901	0.307692	-0.0494506	-0.0714286	0.0824176	-0.593407	-0.236264	-0.813187	-0.406593	-0.813187	-0.879121	-0.851648	-0.28022	0.291209	-0.0549451	0.032967	-0.741758	-0.708791	-0.483516	-0.39011
268365	-0.197802	-0.241758	-0.587912	0.39011	0.247253	-0.302198	0.357143	0.115385	-0.351648	-0.412088	0.21978	-0.32967	-0.587912	0.043956	0.148352	1	0.532967	0.0989011	-0.203297	0.417582	0.192308	0.192308	-0.368132	0.126374	0.32507	-0.225275	0.395604	0.43956	0.181319	-0.021978	-0.0549451	0.302198	-0.142857	-0.0989011	-0.241758	0.0494506	0.104396	0.313187	0.126374	-0.115385	-0.010989	0.467033	-0.313187	0.28022	-0.10989	0.313187	0.159341	0.302198	0.142857
281268	-0.335165	0.17033	0.0604396	-0.0879121	-0.247253	0.0659341	0.153846	-0.296703	-0.406593	-0.313187	0.137363	-0.208791	-0.428571	0.291209	-0.230769	0.532967	1	-0.379121	-0.340659	0.0274725	0.324176	0.351648	-0.664835	-0.203297	-0.192838	0.258242	-0.0384615	-0.0494506	0.131868	0.445055	-0.197802	0.142857	-0.285714	-0.214286	0.214286	0.379121	0.379121	0.131868	0.236264	0.153846	0.197802	0.197802	-0.917582	0.269231	-0.131868	0.208791	0.351648	0.483516	0.532967
288808	-0.225275	-0.186813	-0.478022	0.307692	-0.263736	-0.406593	0.192308	0.0274725	-0.126374	-0.258242	-0.384615	-0.340659	0.00549451	-0.445055	0.505495	0.0989011	-0.379121	1	0.456044	0.269231	-0.0934066	-0.203297	0.313187	0.582418	-0.016529	-0.478022	0.230769	0.00549451	-0.0164835	-0.0384615	0.115385	0.021978	0.10989	0.252747	-0.181319	0.197802	-0.56044	-0.0164835	-0.450549	-0.445055	-0.362637	0.104396	0.527473	0.274725	-0.291209	-0.412088	-0.307692	-0.142857	-0.598901
299159	0.0879121	0.0274725	-0.10989	0.538462	0.241758	-0.186813	0.450549	0.230769	-0.126374	0.208791	0.0549451	-0.0934066	0.384615	0.148352	0.862637	-0.203297	-0.340659	0.456044	1	0.230769	-0.0604396	-0.0769231	0.417582	0.675824	0.0743804	-0.010989	0.137363	-0.258242	0.274725	-0.527473	0.197802	-0.010989	-0.247253	-0.0769231	-0.324176	-0.120879	-0.840659	-0.543956	-0.895604	-0.730769	-0.82967	-0.335165	0.379121	-0.0274725	0.126374	-0.89011	-0.736264	-0.5	-0.395604
309642	-0.153846	-0.379121	-0.417582	0.17033	0.142857	-0.412088	0.368132	0.0659341	-0.521978	-0.620879	0.252747	-0.445055	-0.43956	-0.192308	0.285714	0.417582	0.0274725	0.269231	0.230769	1	0.032967	0.565934	0.120879	0.236264	0.217632	-0.197802	0.032967	0.208791	0.0714286	-0.434066	0.203297	0.802198	0.0989011	0.225275	-0.208791	0.043956	-0.335165	0.406593	-0.181319	-0.307692	-0.313187	0.186813	0.181319	0.428571	-0.0384615	-0.252747	0.0384615	0.335165	-0.5
402237	0.0989011	0.324176	-0.17033	0.335165	0.0824176	0.010989	0.478022	0.527473	0.0384615	0.181319	0.192308	0.164835	-0.230769	-0.010989	0.208791	0.192308	0.324176	-0.0934066	-0.0604396	0.032967	1	0.357143	-0.434066	0.32967	0.33058	0.714286	0.5	0.532967	0.785714	-0.0989011	0.324176	0	0.285714	0.252747	-0.406593	-0.302198	0.126374	0.181319	0.0879121	-0.186813	-0.0604396	-0.0164835	-0.39011	-0.0989011	-0.252747	0.0714286	-0.00549451	0.032967	-0.0494506
415114	-0.291209	-0.0714286	0.0659341	0.043956	0.0714286	-0.181319	0.307692	-0.0824176	-0.538462	-0.291209	0.324176	-0.467033	-0.494505	-0.032967	-0.0769231	0.192308	0.351648	-0.203297	-0.0769231	0.565934	0.357143	1	0.10989	-0.0714286	-0.00550966	0.104396	-0.131868	0.043956	0.192308	0.0384615	0.230769	0.736264	0.285714	0.346154	0.00549451	-0.159341	-0.120879	0.417582	0.00549451	-0.0769231	-0.0769231	-0.120879	-0.28022	0.521978	-0.181319	0	0.0934066	0.368132	-0.0549451
1,5-anhydroglucitol	-0.104396	-0.0164835	0.296703	0.17033	0.137363	-0.291209	-0.192308	-0.137363	-0.115385	0.104396	-0.225275	-0.285714	0.445055	-0.043956	0.21978	-0.368132	-0.664835	0.313187	0.417582	0.120879	-0.434066	0.10989	1	0.263736	-0.0909094	-0.417582	-0.247253	-0.164835	-0.384615	-0.269231	0.241758	0.010989	0.021978	0.0824176	-0.0714286	-0.263736	-0.620879	-0.274725	-0.478022	-0.21978	-0.456044	-0.505495	0.598901	-0.0549451	0.0879121	-0.296703	-0.620879	-0.543956	-0.197802
2,3,5-trihydroxypyrazine	0.043956	0.203297	-0.197802	0.642857	0.0714286	-0.417582	0.5	0.450549	0.0164835	0.175824	-0.192308	0	0.285714	0.021978	0.824176	0.126374	-0.203297	0.582418	0.675824	0.236264	0.32967	-0.0714286	0.263736	1	0.264464	0.0934066	0.428571	0.351648	0.335165	-0.505495	0.598901	-0.153846	-0.186813	-0.0659341	-0.461538	0.0274725	-0.664835	-0.362637	-0.637363	-0.747253	-0.714286	-0.214286	0.230769	-0.10989	-0.214286	-0.576923	-0.60989	-0.434066	-0.357143
2,5-furandicarboxylic acid	0.407715	-0.396696	-0.523418	0.256199	0.66116	0.253444	0.352618	0.586779	-0.016529	0.275483	0.0991739	-0.0523418	-0.336089	-0.40496	0.349864	0.32507	-0.192838	-0.016529	0.0743804	0.217632	0.33058	-0.00550966	-0.0909094	0.264464	1	0.0826449	0.82094	0.705237	0.303031	-0.440773	0.435263	0.110193	0.0247935	-0.0853998	-0.179064	-0.438018	-0.0385676	0.385676	0.173554	-0.0606063	-0.0247935	0.181819	0.305786	-0.0991739	-0.374657	0.184574	-0.101929	-0.181819	-0.0523418
2-ketoisocaproic acid	0.324176	0.642857	0.324176	0.0549451	0.0384615	0.296703	0.197802	0.384615	0.17033	0.291209	0.10989	0.43956	0.258242	0.379121	0.0824176	-0.225275	0.258242	-0.478022	-0.010989	-0.197802	0.714286	0.104396	-0.417582	0.0934066	0.0826449	1	0.148352	0.17033	0.565934	-0.21978	0.0934066	-0.302198	0.126374	0.10989	-0.340659	-0.263736	0.192308	-0.186813	0.021978	-0.0769231	-0.131868	-0.379121	-0.5	-0.532967	0.186813	-0.0989011	-0.0989011	-0.175824	0.159341
5-hydroxymethyl-2-furoic acid	0.131868	-0.258242	-0.543956	0.32967	0.467033	0.32967	0.412088	0.582418	-0.032967	0.208791	-0.0769231	-0.0879121	-0.324176	-0.335165	0.489011	0.395604	-0.0384615	0.230769	0.137363	0.032967	0.5	-0.131868	-0.247253	0.428571	0.82094	0.148352	1	0.593407	0.456044	-0.291209	0.236264	-0.0824176	0.0769231	0.032967	-0.296703	-0.351648	-0.0714286	0.307692	0.0714286	-0.208791	-0.0659341	0.159341	0.104396	-0.0604396	-0.406593	0.0934066	-0.192308	-0.269231	-0.142857
adenosine-5-phosphate	0.175824	-0.126374	-0.384615	0.252747	0.291209	-0.175824	0.137363	0.516484	0.159341	0.0769231	0.0769231	0.17033	-0.258242	-0.291209	0.0714286	0.43956	-0.0494506	0.00549451	-0.258242	0.208791	0.532967	0.043956	-0.164835	0.351648	0.705237	0.17033	0.593407	1	0.274725	-0.357143	0.532967	0.0274725	0.0164835	-0.126374	-0.28022	-0.21978	0.252747	0.379121	0.379121	0.0659341	0.131868	0.335165	0.0879121	-0.21978	-0.335165	0.456044	0.104396	-0.010989	-0.0494506
alphaketoglutaric acid	0.313187	0.186813	-0.417582	0.637363	0.412088	-0.0934066	0.736264	0.747253	0.230769	0.335165	0.565934	0.340659	-0.159341	0.208791	0.494505	0.181319	0.131868	-0.0164835	0.274725	0.0714286	0.785714	0.192308	-0.384615	0.335165	0.303031	0.565934	0.456044	0.274725	1	-0.32967	0.126374	0.0769231	0.318681	0.296703	-0.653846	-0.483516	-0.115385	-0.0714286	-0.241758	-0.494505	-0.28022	0.0549451	-0.148352	-0.043956	0.115385	-0.208791	-0.115385	-0.010989	-0.274725
arginine..ornithine	-0.296703	0.0384615	0.148352	-0.456044	-0.620879	0.159341	-0.296703	-0.60989	-0.137363	-0.115385	-0.318681	-0.274725	-0.28022	-0.258242	-0.598901	-0.021978	0.445055	-0.0384615	-0.527473	-0.434066	-0.0989011	0.0384615	-0.269231	-0.505495	-0.440773	-0.21978	-0.291209	-0.357143	-0.32967	1	-0.258242	-0.104396	0.043956	0.032967	0.648352	0.445055	0.384615	0.197802	0.384615	0.489011	0.554945	0.159341	-0.373626	0.395604	-0.417582	0.362637	0.445055	0.428571	0.461538
aspartic acid	0.335165	0.0494506	-0.0384615	0.247253	0.0714286	-0.291209	0.39011	0.417582	0.175824	0.401099	-0.10989	0.0934066	0.0274725	-0.269231	0.307692	-0.0549451	-0.197802	0.115385	0.197802	0.203297	0.324176	0.230769	0.241758	0.598901	0.435263	0.0934066	0.236264	0.532967	0.126374	-0.258242	1	0.0934066	-0.0164835	-0.0659341	0	0.0769231	-0.340659	0.0164835	-0.131868	-0.346154	-0.236264	-0.131868	0.269231	0.0824176	-0.56044	-0.186813	-0.126374	-0.032967	-0.115385
AUC_199773	-0.258242	-0.615385	-0.368132	-0.0604396	0.159341	-0.208791	0.302198	-0.0494506	-0.428571	-0.483516	0.489011	-0.406593	-0.725275	-0.28022	-0.0494506	0.302198	0.142857	0.021978	-0.010989	0.802198	0	0.736264	0.010989	-0.153846	0.110193	-0.302198	-0.0824176	0.0274725	0.0769231	-0.104396	0.0934066	1	0.230769	0.258242	0.104396	0.021978	-0.0824176	0.620879	0.0934066	-0.0549451	0.0934066	0.373626	0.0934066	0.752747	-0.142857	-0.021978	0.379121	0.631868	-0.423077
AUC_199777	0.247253	0.0659341	-0.181319	0.010989	0.0769231	0.0384615	0.258242	0.395604	0.21978	0.0164835	0.0549451	0.0494506	-0.225275	-0.208791	-0.0714286	-0.142857	-0.285714	0.10989	-0.247253	0.0989011	0.285714	0.285714	0.021978	-0.186813	0.0247935	0.126374	0.0769231	0.0164835	0.318681	0.043956	-0.0164835	0.230769	1	0.950549	-0.357143	-0.423077	-0.0494506	0.384615	0.115385	-0.148352	0.10989	-0.159341	0.214286	0.186813	0.032967	0.0824176	0.186813	0.175824	-0.461538
AUC_199794	0.137363	0.148352	-0.159341	0.0769231	-0.0164835	-0.032967	0.335165	0.296703	0.0164835	-0.137363	-0.043956	-0.131868	-0.175824	-0.142857	0.0824176	-0.0989011	-0.214286	0.252747	-0.0769231	0.225275	0.252747	0.346154	0.0824176	-0.0659341	-0.0853998	0.10989	0.032967	-0.126374	0.296703	0.032967	-0.0659341	0.258242	0.950549	1	-0.406593	-0.335165	-0.247253	0.291209	-0.0989011	-0.307692	-0.104396	-0.285714	0.159341	0.241758	0.0604396	-0.131868	0.032967	0.126374	-0.5
AUC_211972	-0.291209	-0.368132	0.274725	-0.763736	-0.478022	0.362637	-0.5	-0.708791	-0.21978	-0.104396	-0.307692	-0.274725	-0.241758	-0.445055	-0.593407	-0.241758	0.214286	-0.181319	-0.324176	-0.208791	-0.406593	0.00549451	-0.0714286	-0.461538	-0.179064	-0.340659	-0.296703	-0.28022	-0.653846	0.648352	0	0.104396	-0.357143	-0.406593	1	0.593407	0.351648	0.296703	0.456044	0.637363	0.593407	0.241758	-0.0934066	0.379121	-0.527473	0.247253	0.456044	0.384615	0.368132
AUC_213961	-0.302198	-0.032967	0.10989	-0.434066	-0.769231	-0.153846	-0.186813	-0.527473	-0.104396	-0.373626	-0.384615	-0.0934066	-0.0659341	-0.137363	-0.236264	0.0494506	0.379121	0.197802	-0.120879	0.043956	-0.302198	-0.159341	-0.263736	0.0274725	-0.438018	-0.263736	-0.351648	-0.21978	-0.483516	0.445055	0.0769231	0.021978	-0.423077	-0.335165	0.593407	1	0.120879	-0.00549451	0.104396	0.115385	0.214286	0.285714	-0.230769	0.346154	-0.346154	-0.120879	0.412088	0.494505	0.0879121
AUC_226842	-0.115385	-0.104396	0.0879121	-0.56044	-0.186813	0.335165	-0.527473	-0.214286	0.203297	-0.131868	0.148352	0.318681	-0.307692	-0.0714286	-0.813187	0.104396	0.379121	-0.56044	-0.840659	-0.335165	0.126374	-0.120879	-0.620879	-0.664835	-0.0385676	0.192308	-0.0714286	0.252747	-0.115385	0.384615	-0.340659	-0.0824176	-0.0494506	-0.247253	0.351648	0.120879	1	0.423077	0.906593	0.82967	0.873626	0.521978	-0.43956	-0.153846	0	0.82967	0.736264	0.434066	0.384615
AUC_226848	-0.241758	-0.631868	-0.39011	-0.43956	0	0.258242	-0.0659341	-0.0604396	-0.307692	-0.450549	0.0384615	-0.373626	-0.846154	-0.686813	-0.406593	0.313187	0.131868	-0.0164835	-0.543956	0.406593	0.181319	0.417582	-0.274725	-0.362637	0.385676	-0.186813	0.307692	0.379121	-0.0714286	0.197802	0.0164835	0.620879	0.384615	0.291209	0.296703	-0.00549451	0.423077	1	0.697802	0.450549	0.615385	0.505495	0.0274725	0.5	-0.489011	0.543956	0.615385	0.565934	-0.208791
AUC_232946	-0.0989011	-0.313187	-0.00549451	-0.653846	-0.137363	0.395604	-0.489011	-0.175824	0.115385	-0.164835	0	0.120879	-0.489011	-0.373626	-0.813187	0.126374	0.236264	-0.450549	-0.895604	-0.181319	0.0879121	0.00549451	-0.478022	-0.637363	0.173554	0.021978	0.0714286	0.379121	-0.241758	0.384615	-0.131868	0.0934066	0.115385	-0.0989011	0.456044	0.104396	0.906593	0.697802	1	0.835165	0.934066	0.516484	-0.236264	0.032967	-0.269231	0.884615	0.78022	0.483516	0.269231
AUC_235972	-0.247253	-0.252747	0.241758	-0.747253	-0.258242	0.417582	-0.796703	-0.56044	-0.0769231	-0.203297	-0.104396	-0.0384615	-0.21978	-0.318681	-0.879121	-0.115385	0.153846	-0.445055	-0.730769	-0.307692	-0.186813	-0.0769231	-0.21978	-0.747253	-0.0606063	-0.0769231	-0.208791	0.0659341	-0.494505	0.489011	-0.346154	-0.0549451	-0.148352	-0.307692	0.637363	0.115385	0.82967	0.450549	0.835165	1	0.82967	0.351648	-0.192308	-0.104396	-0.137363	0.774725	0.538462	0.252747	0.450549
AUC_241882	-0.164835	-0.39011	-0.00549451	-0.703297	-0.247253	0.39011	-0.516484	-0.285714	0.203297	-0.104396	0.032967	0.153846	-0.478022	-0.395604	-0.851648	-0.010989	0.197802	-0.362637	-0.82967	-0.313187	-0.0604396	-0.0769231	-0.456044	-0.714286	-0.0247935	-0.131868	-0.0659341	0.131868	-0.28022	0.554945	-0.236264	0.0934066	0.10989	-0.104396	0.593407	0.214286	0.873626	0.615385	0.934066	0.82967	1	0.587912	-0.17033	0.192308	-0.269231	0.796703	0.840659	0.56044	0.208791
AUC_271416	-0.181319	-0.675824	-0.653846	-0.115385	-0.0274725	-0.142857	-0.043956	-0.0274725	0.0989011	-0.291209	0.39011	0.0934066	-0.648352	-0.395604	-0.28022	0.467033	0.197802	0.104396	-0.335165	0.186813	-0.0164835	-0.120879	-0.505495	-0.214286	0.181819	-0.379121	0.159341	0.335165	0.0549451	0.159341	-0.131868	0.373626	-0.159341	-0.285714	0.241758	0.285714	0.521978	0.505495	0.516484	0.351648	0.587912	1	0.0549451	0.39011	-0.21978	0.456044	0.686813	0.637363	-0.164835
AUC_281268	0.307692	-0.43956	-0.351648	0.137363	0.258242	-0.181319	0	0.258242	0.269231	0.192308	-0.0659341	0.0274725	0.153846	-0.489011	0.291209	-0.313187	-0.917582	0.527473	0.379121	0.181319	-0.39011	-0.28022	0.598901	0.230769	0.305786	-0.5	0.104396	0.0879121	-0.148352	-0.373626	0.269231	0.0934066	0.214286	0.159341	-0.0934066	-0.230769	-0.43956	0.0274725	-0.236264	-0.192308	-0.17033	0.0549451	1	0.0274725	-0.0659341	-0.225275	-0.225275	-0.258242	-0.587912
AUC_285340	-0.368132	-0.565934	-0.373626	-0.0989011	-0.159341	-0.159341	0.32967	-0.225275	-0.357143	-0.335165	0.164835	-0.505495	-0.736264	-0.401099	-0.0549451	0.28022	0.269231	0.274725	-0.0274725	0.428571	-0.0989011	0.521978	-0.0549451	-0.10989	-0.0991739	-0.532967	-0.0604396	-0.21978	-0.043956	0.395604	0.0824176	0.752747	0.186813	0.241758	0.379121	0.346154	-0.153846	0.5	0.032967	-0.104396	0.192308	0.39011	0.0274725	1	-0.467033	-0.0714286	0.412088	0.681319	-0.274725
AUC_295002	0.131868	0.313187	0.225275	0.203297	0.291209	-0.131868	-0.115385	0.0934066	0.230769	-0.0384615	0.423077	0.401099	0.467033	0.763736	0.032967	-0.10989	-0.131868	-0.291209	0.126374	-0.0384615	-0.252747	-0.181319	0.0879121	-0.214286	-0.374657	0.186813	-0.406593	-0.335165	0.115385	-0.417582	-0.56044	-0.142857	0.032967	0.0604396	-0.527473	-0.346154	0	-0.489011	-0.269231	-0.137363	-0.269231	-0.21978	-0.0659341	-0.467033	1	-0.137363	-0.197802	-0.241758	-0.0549451
AUC_299159	-0.131868	-0.225275	-0.043956	-0.351648	0.043956	0.186813	-0.483516	-0.142857	0.104396	-0.0989011	0.0659341	0.0604396	-0.406593	-0.214286	-0.741758	0.313187	0.208791	-0.412088	-0.89011	-0.252747	0.0714286	0	-0.296703	-0.576923	0.184574	-0.0989011	0.0934066	0.456044	-0.208791	0.362637	-0.186813	-0.021978	0.0824176	-0.131868	0.247253	-0.120879	0.82967	0.543956	0.884615	0.774725	0.796703	0.456044	-0.225275	-0.0714286	-0.137363	1	0.56044	0.28022	0.417582
AUC_299211	-0.0384615	-0.362637	-0.192308	-0.565934	-0.296703	0.104396	-0.17033	-0.153846	0.197802	-0.269231	0.236264	0.203297	-0.60989	-0.285714	-0.708791	0.159341	0.351648	-0.307692	-0.736264	0.0384615	-0.00549451	0.0934066	-0.620879	-0.60989	-0.101929	-0.0989011	-0.192308	0.104396	-0.115385	0.445055	-0.126374	0.379121	0.186813	0.032967	0.456044	0.412088	0.736264	0.615385	0.78022	0.538462	0.840659	0.686813	-0.225275	0.412088	-0.197802	0.56044	1	0.89011	0.010989
AUC_369638	-0.120879	-0.357143	-0.302198	-0.351648	-0.324176	-0.153846	0.120879	-0.186813	-0.0494506	-0.412088	0.32967	-0.032967	-0.714286	-0.241758	-0.483516	0.302198	0.483516	-0.142857	-0.5	0.335165	0.032967	0.368132	-0.543956	-0.434066	-0.181819	-0.175824	-0.269231	-0.010989	-0.010989	0.428571	-0.032967	0.631868	0.175824	0.126374	0.384615	0.494505	0.434066	0.565934	0.483516	0.252747	0.56044	0.637363	-0.258242	0.681319	-0.241758	0.28022	0.89011	1	-0.0879121
AUC_4-hydroxybenzoate	0.0384615	0.335165	0.423077	-0.153846	-0.043956	0.247253	-0.291209	-0.379121	-0.148352	0.203297	-0.148352	-0.0714286	0.10989	0.302198	-0.39011	0.142857	0.532967	-0.598901	-0.395604	-0.5	-0.0494506	-0.0549451	-0.197802	-0.357143	-0.0523418	0.159341	-0.142857	-0.0494506	-0.274725	0.461538	-0.115385	-0.423077	-0.461538	-0.5	0.368132	0.0879121	0.384615	-0.208791	0.269231	0.450549	0.208791	-0.164835	-0.587912	-0.274725	-0.0549451	0.417582	0.010989	-0.0879121	1
AUC_alphaketoglutaric acid	-0.527473	-0.28022	0.175824	-0.478022	-0.115385	0.214286	-0.653846	-0.401099	-0.104396	-0.395604	-0.296703	-0.225275	-0.192308	-0.137363	-0.571429	0.181319	-0.00549451	-0.0549451	-0.620879	-0.137363	-0.362637	-0.0824176	0.10989	-0.428571	-0.129477	-0.428571	-0.032967	0.0659341	-0.587912	0.263736	-0.384615	-0.00549451	0.0824176	0.010989	0.247253	0.0494506	0.450549	0.423077	0.571429	0.549451	0.549451	0.175824	-0.0604396	0.043956	0.010989	0.664835	0.28022	0.0494506	0.120879
AUC_arachidic acid	-0.483516	-0.181319	0.153846	-0.697802	-0.653846	0.406593	-0.478022	-0.78022	-0.489011	-0.494505	-0.5	-0.43956	-0.208791	-0.340659	-0.406593	-0.0164835	0.423077	0.0549451	-0.236264	-0.104396	-0.274725	-0.137363	-0.318681	-0.340659	-0.275483	-0.17033	-0.142857	-0.340659	-0.543956	0.615385	-0.368132	-0.043956	-0.384615	-0.296703	0.747253	0.664835	0.335165	0.252747	0.32967	0.538462	0.406593	0.214286	-0.32967	0.21978	-0.368132	0.115385	0.313187	0.28022	0.302198
AUC_arginine..ornithine	-0.324176	-0.428571	-0.0494506	-0.0604396	0.373626	0.043956	-0.0384615	-0.10989	-0.60989	-0.521978	0.241758	-0.483516	-0.258242	-0.0659341	0.10989	0.142857	-0.120879	-0.0384615	0.197802	0.730769	-0.131868	0.516484	0.335165	-0.0549451	0.217632	-0.126374	0.0274725	0.032967	-0.0989011	-0.505495	-0.126374	0.648352	0.032967	0.115385	-0.126374	-0.318681	-0.192308	0.379121	-0.0659341	0.00549451	-0.203297	-0.0494506	0.159341	0.148352	0.208791	-0.0879121	-0.164835	-0.043956	-0.324176
AUC_aspartic acid	-0.32967	-0.0549451	-0.00549451	-0.335165	-0.230769	0.142857	-0.428571	-0.412088	-0.0164835	-0.456044	0.181319	0.0549451	-0.142857	0.208791	-0.521978	0.0989011	0.269231	-0.153846	-0.43956	-0.192308	-0.258242	-0.192308	-0.384615	-0.686813	-0.523418	-0.104396	-0.351648	-0.412088	-0.126374	0.379121	-0.928571	-0.0164835	0.104396	0.0989011	0.0604396	0.0714286	0.549451	0.10989	0.340659	0.456044	0.456044	0.335165	-0.318681	0.00549451	0.5	0.362637	0.423077	0.307692	0.0824176
AUC_behenic acid	-0.60989	0.302198	0.626374	-0.313187	-0.56044	0.148352	-0.489011	-0.71978	-0.324176	-0.159341	-0.423077	-0.208791	0.335165	0.269231	-0.197802	-0.159341	0.417582	-0.0659341	0.0384615	-0.39011	-0.203297	-0.131868	0.0274725	-0.010989	-0.56474	0.0164835	-0.324176	-0.423077	-0.434066	0.417582	-0.263736	-0.39011	-0.637363	-0.516484	0.456044	0.5	0.0989011	-0.379121	-0.0824176	0.247253	0.00549451	-0.214286	-0.516484	-0.10989	-0.0384615	-0.0824176	-0.186813	-0.192308	0.489011
AUC_cystine	-0.0714286	0.417582	0.593407	0	-0.0934066	-0.00549451	0.115385	-0.0824176	-0.318681	-0.010989	-0.401099	-0.263736	0.395604	0.291209	0.307692	-0.225275	0	-0.032967	0.357143	0.214286	-0.043956	0.32967	0.461538	0.395604	-0.132232	0.203297	-0.153846	-0.186813	-0.225275	-0.258242	0.39011	-0.010989	-0.0824176	0.0879121	-0.043956	0.115385	-0.56044	-0.291209	-0.461538	-0.417582	-0.571429	-0.78022	-0.120879	-0.0714286	-0.0164835	-0.521978	-0.5	-0.340659	0.0384615
AUC_fumaric acid	0.126374	0.241758	0.28022	-0.0604396	0.0714286	0.324176	-0.153846	-0.131868	0.0989011	0.472527	0.0879121	0.192308	0.032967	0.236264	-0.324176	0.0549451	0.494505	-0.631868	-0.32967	-0.642857	0.197802	-0.10989	-0.368132	-0.291209	0.0826449	0.307692	0.043956	0.0714286	0.0494506	0.412088	-0.0274725	-0.434066	-0.434066	-0.554945	0.32967	-0.0274725	0.483516	-0.192308	0.324176	0.428571	0.318681	0.021978	-0.549451	-0.263736	-0.131868	0.428571	0.0934066	-0.0549451	0.879121
AUC_gamma-tocopherol	-0.395604	0.10989	0.203297	0.0604396	-0.197802	-0.285714	0.10989	-0.131868	-0.368132	-0.428571	-0.346154	-0.32967	0.0879121	0.208791	0.302198	0.28022	0.17033	0.263736	0.225275	0.461538	-0.131868	0.208791	0.247253	0.5	-0.146006	-0.148352	-0.032967	0.0274725	-0.291209	-0.263736	0.263736	0.17033	-0.230769	-0.043956	-0.0879121	0.423077	-0.412088	-0.0824176	-0.318681	-0.423077	-0.423077	-0.252747	-0.148352	0.159341	-0.0549451	-0.346154	-0.236264	-0.0494506	-0.153846
AUC_glutamine minor	-0.0769231	-0.351648	-0.186813	-0.532967	-0.241758	0.302198	-0.203297	-0.021978	0.214286	-0.175824	-0.285714	-0.010989	-0.478022	-0.510989	-0.494505	0.0714286	-0.0384615	0.0824176	-0.664835	-0.115385	-0.0824176	-0.0934066	-0.269231	-0.39011	0.0550966	-0.285714	0.159341	0.131868	-0.263736	0.423077	-0.0714286	0.131868	0.510989	0.384615	0.313187	0.214286	0.434066	0.67033	0.67033	0.362637	0.714286	0.357143	0.0879121	0.357143	-0.373626	0.521978	0.664835	0.467033	-0.175824
AUC_glycine	-0.17033	-0.576923	-0.0769231	-0.494505	0.0769231	0.142857	-0.483516	-0.351648	-0.225275	-0.417582	0.351648	-0.0934066	-0.318681	-0.302198	-0.505495	-0.0714286	-0.0989011	-0.285714	-0.263736	0.340659	-0.285714	0.159341	-0.0274725	-0.571429	0.0771353	-0.181319	-0.258242	0.0384615	-0.285714	-0.0824176	-0.302198	0.483516	-0.10989	-0.203297	0.346154	-0.0549451	0.461538	0.489011	0.483516	0.648352	0.461538	0.461538	0.17033	0.0659341	0.142857	0.362637	0.423077	0.32967	-0.0879121
AUC_histidine	0.142857	-0.137363	-0.236264	0.362637	0.296703	-0.296703	0.258242	0.269231	-0.159341	-0.043956	0.131868	-0.225275	0.115385	-0.241758	0.478022	-0.247253	-0.659341	0.445055	0.565934	0.521978	0.021978	0.28022	0.620879	0.32967	0.195593	-0.0934066	0.0384615	0.010989	0.214286	-0.521978	0.197802	0.340659	0.384615	0.461538	-0.428571	-0.5	-0.637363	0.010989	-0.510989	-0.412088	-0.543956	-0.269231	0.675824	0.032967	0.120879	-0.467033	-0.483516	-0.307692	-0.642857
AUC_isolinoleic acid	-0.0769231	0.10989	0.39011	-0.450549	-0.538462	-0.0769231	-0.263736	-0.307692	0.17033	-0.153846	-0.285714	0.258242	0.258242	0.148352	-0.208791	-0.186813	0.148352	-0.0824176	-0.0604396	-0.00549451	-0.368132	-0.247253	-0.115385	0.0604396	-0.388431	-0.0494506	-0.428571	-0.159341	-0.494505	0.0494506	0.186813	-0.0879121	-0.434066	-0.401099	0.423077	0.824176	0.10989	-0.197802	0.0714286	0.0494506	0.115385	0.0549451	-0.148352	0.00549451	-0.032967	-0.181319	0.302198	0.274725	0.043956
AUC_lactic acid	0.648352	0.631868	0.274725	0.0934066	0.164835	0.0659341	0.236264	0.340659	0.175824	0.197802	0.10989	0.307692	0.335165	0.434066	0.0384615	-0.236264	-0.0164835	-0.445055	-0.043956	0.0164835	0.236264	0.142857	-0.0879121	-0.142857	-0.0220387	0.653846	-0.208791	-0.0824176	0.28022	-0.241758	0.021978	-0.142857	0.412088	0.428571	-0.423077	-0.346154	-0.0659341	-0.236264	-0.137363	-0.192308	-0.285714	-0.565934	-0.17033	-0.43956	0.450549	-0.175824	-0.10989	-0.104396	0.120879
AUC_levoglucosan	-0.417582	0.285714	0.351648	-0.43956	-0.879121	-0.175824	-0.368132	-0.357143	0.164835	-0.28022	-0.340659	0.186813	0.115385	-0.0934066	-0.417582	-0.285714	0.164835	0.17033	-0.302198	-0.164835	0.115385	-0.0274725	-0.164835	0.00549451	-0.633611	0.10989	-0.401099	-0.0879121	-0.203297	0.412088	0.021978	-0.120879	0.0494506	0.0659341	0.28022	0.620879	0.302198	0.032967	0.230769	0.208791	0.324176	0.0989011	-0.258242	0.0824176	-0.175824	0.0494506	0.373626	0.32967	-0.148352
AUC_N-methylalanine	-0.159341	-0.604396	-0.153846	-0.0549451	0.340659	0.010989	-0.274725	-0.247253	-0.368132	-0.115385	0.181319	-0.423077	-0.148352	-0.428571	-0.0384615	-0.126374	-0.450549	0.0989011	0.203297	0.302198	-0.340659	0.197802	0.549451	-0.17033	0.278238	-0.450549	-0.0274725	0.00549451	-0.252747	-0.175824	-0.0494506	0.379121	-0.10989	-0.142857	0.203297	-0.373626	-0.137363	0.258242	-0.00549451	0.291209	0.00549451	0.126374	0.554945	0.120879	-0.0494506	0.0824176	-0.197802	-0.175824	-0.131868
AUC_oleamide	-0.648352	-0.0989011	0.043956	0.0549451	-0.258242	-0.445055	-0.318681	-0.302198	-0.181319	-0.456044	-0.335165	-0.351648	0.0384615	-0.0769231	-0.043956	0.21978	-0.181319	0.532967	-0.0714286	0.164835	-0.285714	0.032967	0.5	0.21978	-0.311296	-0.576923	-0.115385	0.0549451	-0.417582	0.0494506	-0.0714286	0.0549451	0.032967	0.10989	-0.0879121	0.148352	-0.17033	0.0659341	-0.0769231	-0.0494506	-0.0604396	0.021978	0.175824	0.17033	-0.010989	0.126374	-0.159341	-0.120879	-0.247253
AUC_oxoproline	-0.247253	-0.516484	-0.252747	-0.313187	0.142857	0.0934066	-0.0164835	-0.120879	-0.274725	-0.428571	0.510989	-0.164835	-0.824176	-0.17033	-0.516484	0.478022	0.494505	-0.450549	-0.587912	0.406593	0.148352	0.543956	-0.456044	-0.538462	0.179064	-0.0659341	0.00549451	0.263736	0.0384615	0.148352	-0.137363	0.708791	0.0934066	-0.010989	0.252747	0.021978	0.593407	0.758242	0.67033	0.467033	0.598901	0.598901	-0.340659	0.461538	-0.115385	0.587912	0.725275	0.736264	0.0769231
AUC_palmitoleic acid	0.10989	-0.478022	-0.467033	-0.241758	0	0.0549451	-0.021978	0.230769	0.324176	-0.159341	-0.120879	0.0604396	-0.406593	-0.521978	-0.203297	0.115385	-0.362637	0.318681	-0.395604	0.115385	-0.181319	-0.186813	-0.0824176	-0.192308	0.195593	-0.434066	0.21978	0.208791	-0.142857	0.0769231	-0.010989	0.230769	0.587912	0.472527	0.0164835	0.043956	0.17033	0.582418	0.423077	0.0934066	0.461538	0.412088	0.461538	0.324176	-0.197802	0.32967	0.505495	0.362637	-0.494505
AUC_phenol	-0.258242	0.373626	0.175824	-0.126374	-0.434066	-0.291209	-0.368132	-0.175824	0.236264	-0.379121	0.137363	0.362637	0.175824	0.340659	-0.423077	-0.0384615	0.142857	-0.0549451	-0.384615	-0.115385	0.0879121	-0.0989011	-0.247253	-0.274725	-0.639121	0.208791	-0.467033	-0.0934066	0.0549451	0.137363	-0.510989	-0.142857	0.192308	0.186813	-0.252747	0.0989011	0.456044	-0.0934066	0.203297	0.230769	0.230769	0.153846	-0.313187	-0.252747	0.532967	0.241758	0.296703	0.208791	-0.104396
AUC_propane-1,2,3-tricarboxylate	-0.241758	-0.362637	0.0934066	-0.631868	-0.10989	0.225275	-0.587912	-0.258242	0.159341	-0.307692	0.285714	0.291209	-0.313187	-0.0824176	-0.774725	0.021978	0.164835	-0.489011	-0.681319	-0.032967	-0.126374	-0.0274725	-0.384615	-0.642857	-0.0936643	-0.0164835	-0.225275	0.175824	-0.258242	0.115385	-0.32967	0.21978	-0.0714286	-0.252747	0.357143	0.153846	0.862637	0.483516	0.818681	0.758242	0.807692	0.582418	-0.197802	-0.021978	0.148352	0.681319	0.747253	0.489011	0.0659341
AUC_salicylaldehyde	-0.291209	0.351648	0.824176	-0.357143	-0.357143	0.159341	-0.494505	-0.686813	-0.21978	0.0879121	-0.32967	-0.148352	0.428571	0.357143	-0.335165	-0.324176	0.285714	-0.384615	-0.0494506	-0.423077	-0.379121	0.00549451	0.247253	-0.214286	-0.509644	-0.00549451	-0.543956	-0.483516	-0.576923	0.395604	-0.0879121	-0.335165	-0.549451	-0.489011	0.543956	0.346154	0.0494506	-0.434066	-0.0604396	0.296703	0.00549451	-0.434066	-0.406593	-0.142857	0.032967	-0.0274725	-0.181319	-0.197802	0.686813
AUC_stearic acid	-0.0879121	0.269231	0.538462	-0.302198	-0.274725	0.302198	-0.434066	-0.417582	0.0549451	0.236264	-0.631868	-0.0494506	0.39011	0.17033	-0.225275	-0.131868	0.131868	-0.148352	-0.186813	-0.642857	-0.423077	-0.43956	0.115385	-0.0934066	-0.223141	-0.17033	-0.120879	-0.252747	-0.615385	0.428571	-0.043956	-0.631868	-0.423077	-0.417582	0.456044	0.368132	0.0824176	-0.351648	0.0769231	0.230769	0.126374	-0.313187	-0.225275	-0.21978	-0.148352	0.142857	-0.137363	-0.302198	0.653846
AUC_stigmasterol	0	0.131868	0.379121	-0.576923	-0.241758	0.417582	-0.379121	-0.104396	0.461538	0.120879	-0.00549451	0.494505	-0.0549451	0.208791	-0.692308	-0.137363	0.313187	-0.582418	-0.71978	-0.543956	-0.0274725	-0.203297	-0.505495	-0.576923	-0.289257	0.214286	-0.203297	-0.0769231	-0.17033	0.401099	-0.252747	-0.225275	0.104396	-0.0604396	0.324176	0.247253	0.741758	0.142857	0.67033	0.494505	0.725275	0.164835	-0.461538	-0.0879121	0.0989011	0.532967	0.653846	0.362637	0.318681
AUC_threonic acid	-0.10989	-0.659341	-0.00549451	-0.379121	0.043956	0.043956	-0.357143	-0.43956	-0.0604396	0.0274725	0.230769	-0.104396	-0.225275	-0.318681	-0.384615	-0.142857	-0.104396	-0.192308	-0.0659341	0.032967	-0.571429	0.010989	0.181319	-0.39011	0.0247935	-0.56044	-0.318681	-0.148352	-0.489011	0.186813	0.043956	0.340659	-0.43956	-0.549451	0.714286	0.247253	0.192308	0.181319	0.263736	0.472527	0.406593	0.43956	0.291209	0.346154	-0.197802	0.197802	0.32967	0.302198	0.153846
AUC_trans-4-hydroxyproline	-0.0989011	-0.357143	-0.527473	0.307692	0.159341	-0.159341	0.247253	0.307692	0.115385	-0.181319	0.159341	0.0769231	0.010989	-0.0989011	0.554945	0.0274725	-0.434066	0.653846	0.56044	0.302198	-0.120879	-0.313187	0.0824176	0.384615	0.0440773	-0.252747	0.263736	-0.0879121	0.274725	-0.472527	-0.214286	0.153846	0.115385	0.192308	-0.423077	-0.0769231	-0.384615	-0.0604396	-0.412088	-0.472527	-0.307692	0.258242	0.505495	0.10989	0.247253	-0.461538	-0.192308	-0.126374	-0.818681
AUC_UDP-glucuronic acid	-0.379121	0.357143	0.252747	-0.225275	-0.725275	-0.340659	-0.236264	-0.175824	0.164835	-0.379121	-0.225275	0.181319	0.148352	0.021978	-0.269231	-0.214286	0.0274725	0.274725	-0.225275	0.021978	0.175824	0.0714286	-0.043956	0.0769231	-0.639121	0.137363	-0.39011	-0.0604396	-0.043956	0.192308	-0.0549451	-0.0274725	0.307692	0.357143	-0.0824176	0.373626	0.148352	0.021978	0.0769231	0.00549451	0.126374	-0.00549451	-0.159341	0.032967	0.0659341	-0.0274725	0.241758	0.247253	-0.373626
AUC_uric acid	-0.043956	-0.357143	-0.247253	-0.175824	-0.010989	-0.225275	0.137363	0.214286	0.0384615	-0.296703	0.32967	0.0164835	-0.521978	-0.401099	-0.241758	0.021978	-0.137363	0.0164835	-0.285714	0.582418	0.263736	0.576923	-0.0164835	-0.10989	0.123967	-0.021978	-0.0549451	0.346154	0.159341	-0.148352	0.302198	0.736264	0.571429	0.483516	-0.043956	-0.0659341	0.148352	0.681319	0.351648	0.0604396	0.296703	0.318681	0.214286	0.434066	-0.175824	0.186813	0.516484	0.576923	-0.582418
AUC_uridine	-0.0604396	-0.450549	-0.258242	-0.32967	0.0604396	0.131868	-0.0824176	0.0494506	-0.197802	-0.505495	-0.120879	-0.296703	-0.335165	-0.483516	-0.0824176	-0.021978	-0.412088	0.263736	-0.131868	0.56044	-0.175824	0.197802	0.181319	-0.175824	0.195593	-0.247253	0.0989011	0.0769231	-0.197802	-0.236264	-0.0934066	0.510989	0.582418	0.593407	-0.0714286	-0.142857	-0.0604396	0.648352	0.214286	0.0659341	0.137363	0.0769231	0.456044	0.241758	-0.0164835	0.0549451	0.208791	0.186813	-0.626374
citric acid	0.126374	0.626374	0.395604	0.401099	0.214286	-0.197802	0.148352	0.148352	0.208791	0.203297	0.368132	0.417582	0.505495	0.994505	0.17033	0.0274725	0.263736	-0.423077	0.175824	-0.203297	0.032967	-0.043956	-0.0494506	0.043956	-0.396696	0.406593	-0.32967	-0.274725	0.274725	-0.269231	-0.258242	-0.296703	-0.186813	-0.126374	-0.489011	-0.175824	-0.0824176	-0.714286	-0.401099	-0.340659	-0.417582	-0.384615	-0.461538	-0.423077	0.774725	-0.230769	-0.302198	-0.252747	0.28022
cysteine-glycine	0.505495	0.335165	0.0274725	0.236264	0.445055	0.115385	0.384615	0.450549	0.252747	0.373626	0.587912	0.434066	-0.120879	0.510989	-0.0934066	0.203297	0.434066	-0.758242	-0.28022	-0.131868	0.478022	0.241758	-0.505495	-0.263736	0.198348	0.620879	0.0549451	0.186813	0.56044	-0.0934066	0.0164835	0	0.148352	0.0384615	-0.302198	-0.379121	0.32967	-0.0604396	0.186813	-0.0164835	0.0714286	-0.0494506	-0.510989	-0.214286	0.296703	0.236264	0.208791	0.181319	0.406593
cystine	0.0714286	-0.17033	-0.175824	-0.126374	0.186813	0.208791	-0.186813	0.159341	0.478022	0.175824	0.571429	0.56044	-0.269231	0.115385	-0.489011	0.0934066	0.192308	-0.472527	-0.527473	-0.395604	0.192308	-0.197802	-0.582418	-0.543956	0.0137742	0.175824	0.0384615	0.164835	0.313187	0.164835	-0.412088	-0.0549451	0.0824176	-0.142857	0	-0.214286	0.785714	0.197802	0.604396	0.489011	0.67033	0.582418	-0.241758	-0.120879	0.258242	0.626374	0.576923	0.324176	0.142857
dithiothreitol	0.543956	0.230769	-0.115385	0.384615	0.291209	-0.214286	0.302198	0.445055	0.549451	0.593407	0.494505	0.642857	0.0659341	0.351648	0.00549451	0.181319	0.241758	-0.456044	-0.120879	-0.302198	0.318681	-0.153846	-0.395604	0.0604396	0.217632	0.324176	0.0549451	0.368132	0.428571	-0.0714286	0.318681	-0.236264	-0.258242	-0.417582	-0.142857	-0.0659341	0.274725	-0.313187	0.0989011	-0.0494506	0.0714286	0.236264	-0.225275	-0.252747	0.0714286	0.197802	0.175824	0.120879	0.401099
GABA	0.181319	0.208791	0.258242	-0.043956	-0.274725	-0.17033	-0.208791	0.021978	0.324176	0.395604	-0.21978	0.203297	0.434066	-0.340659	-0.043956	-0.730769	-0.604396	0.230769	0.175824	-0.241758	0.0879121	-0.043956	0.494505	0.186813	-0.115703	0.0824176	-0.225275	0.021978	-0.032967	0.043956	0.417582	-0.230769	0.197802	0.131868	0.0934066	-0.115385	-0.186813	-0.186813	-0.137363	0.043956	-0.0604396	-0.274725	0.489011	-0.192308	-0.214286	-0.164835	-0.21978	-0.274725	-0.214286
gamma-tocopherol	-0.327373	-0.143054	0.0577717	-0.101788	0.0605228	-0.0302614	-0.0302614	-0.220083	-0.272352	-0.192572	0.547456	-0.209079	-0.473178	0.0082531	-0.442917	0.0302614	0.299863	-0.363137	-0.327373	0.145805	0.242091	0.726273	-0.0522696	-0.533701	-0.223448	0.0605228	-0.297112	-0.145805	0.217332	0.302614	-0.26685	0.547456	0.338377	0.288859	0.0880331	-0.321871	0.297112	0.387896	0.26685	0.321871	0.316369	0.134801	-0.294361	0.390647	0.0852821	0.327373	0.310867	0.409904	0.0550207
Glucose	-0.052487	0.400559	0.303872	0.140886	-0.0414371	-0.0276247	0.0745868	0.124311	0.0828742	0.193373	-0.345309	-0.146411	0.187848	0.0773492	0.0414371	-0.193373	-0.218235	0.162986	-0.0883991	-0.23481	0.132599	0.22376	0.436471	0.0911616	-0.202217	0.0138124	-0.00276247	-0.129836	0.0165748	0.176798	0.0966866	-0.176798	0.632606	0.662994	-0.270722	-0.328734	-0.314922	-0.0635369	-0.179561	-0.262435	-0.171273	-0.610507	0.0414371	0.0331497	-0.0303872	-0.0165748	-0.309397	-0.30111	-0.0690618
glutamic acid	-0.00549451	0.373626	0.39011	-0.417582	-0.703297	-0.17033	-0.269231	-0.28022	0.313187	0.0274725	-0.252747	0.208791	0.0604396	-0.0989011	-0.620879	-0.346154	0.120879	-0.10989	-0.549451	-0.318681	0.0494506	0.115385	-0.0824176	-0.307692	-0.561986	0.0659341	-0.554945	-0.142857	-0.236264	0.642857	0.142857	-0.10989	0.32967	0.263736	0.357143	0.412088	0.324176	0.0604396	0.335165	0.291209	0.434066	-0.0549451	-0.197802	0.148352	-0.214286	0.241758	0.483516	0.434066	0.142857
glycine	-0.010989	-0.230769	-0.0659341	0.291209	0.472527	0.164835	0.197802	0.115385	-0.010989	0.538462	0.153846	-0.120879	-0.197802	0.0164835	0.131868	0.252747	0.17033	-0.203297	0.0494506	-0.32967	0.0604396	0.0604396	0.0769231	0.0879121	0.393941	-0.197802	0.39011	0.159341	0.0934066	0.137363	0.252747	-0.0769231	-0.318681	-0.412088	0.186813	-0.21978	-0.0494506	-0.0549451	0.010989	-0.010989	0.0494506	0.0549451	-0.0824176	0.17033	-0.346154	0.214286	-0.175824	-0.186813	0.461538
Insulin	0.171036	-0.226209	-0.565522	0.160001	0.129656	0.0882766	0.160001	0.267588	0.198622	0.195864	0.16276	0.00827593	-0.394486	-0.482763	-0.0744834	0.0634488	-0.160001	0.231726	-0.215174	-0.22345	0.336555	-0.0551729	-0.215174	-0.20414	0.258645	-0.0662075	0.364141	0.168277	0.422073	0.328279	-0.154484	0	0.532418	0.411038	-0.113104	-0.413797	0.195864	0.355865	0.245519	0.157243	0.331037	0.344831	0.234485	0.168277	-0.245519	0.336555	0.195864	0.12138	-0.151725
kynurenine	-0.258242	-0.434066	-0.346154	0.0769231	0.467033	0.423077	0.131868	0.181319	-0.164835	0.0384615	0.197802	-0.269231	-0.598901	-0.197802	-0.032967	0.401099	0.164835	-0.0714286	-0.252747	-0.104396	0.258242	0.186813	-0.192308	-0.214286	0.41047	-0.120879	0.60989	0.192308	0.274725	0.137363	-0.258242	0.192308	0.28022	0.192308	-0.0659341	-0.478022	0.21978	0.510989	0.335165	0.153846	0.32967	0.247253	-0.120879	0.28022	-0.192308	0.461538	0.0989011	0.010989	0.032967
lactic acid	-0.576923	-0.340659	0.021978	-0.230769	-0.428571	-0.104396	-0.461538	-0.373626	-0.0989011	-0.17033	-0.412088	-0.214286	0.0494506	-0.543956	-0.0604396	-0.203297	-0.307692	0.554945	0.126374	-0.0494506	-0.164835	-0.186813	0.351648	0.291209	-0.0853998	-0.428571	0.0549451	0.120879	-0.384615	0.131868	0.159341	-0.0604396	-0.302198	-0.302198	0.384615	0.32967	-0.0274725	0.120879	0.0604396	0.225275	0.159341	0.247253	0.351648	0.126374	-0.456044	0.0274725	-0.0824176	-0.142857	-0.263736
lysine	0.357143	0.725275	0.335165	0.17033	-0.296703	-0.10989	0.00549451	-0.0384615	0.39011	0.494505	-0.263736	0.302198	0.521978	0.362637	-0.0604396	-0.247253	0.104396	-0.0879121	-0.0714286	-0.697802	0.010989	-0.340659	-0.0384615	-0.021978	-0.40496	0.203297	-0.296703	-0.302198	0.0164835	0.461538	-0.010989	-0.703297	0	0.00549451	-0.0164835	0.104396	-0.0384615	-0.637363	-0.214286	-0.0934066	-0.115385	-0.395604	-0.230769	-0.307692	0.0879121	-0.0714286	-0.17033	-0.203297	0.510989
malic acid	-0.0605228	0.726273	0.550207	0.236589	0.0165062	-0.18707	-0.0192572	0.0605228	0.0495186	-0.0137552	0.129299	0.313618	0.508941	0.885833	0.0715269	0.0467676	0.321871	-0.407153	0.0357634	-0.07978	0.200825	0.07978	-0.0357634	0.148556	-0.365518	0.552958	-0.277854	-0.0412655	0.162311	-0.310867	-0.126548	-0.299863	-0.195323	-0.115543	-0.464925	-0.0852821	0.0192572	-0.544705	-0.244842	-0.217332	-0.376892	-0.456672	-0.577717	-0.53095	0.629987	-0.123797	-0.297112	-0.280605	0.272352
N-methylalanine	-0.0604396	0.527473	0.0384615	0.186813	-0.510989	-0.307692	0.0494506	-0.197802	-0.0824176	-0.263736	-0.340659	0.032967	0.406593	0.346154	0.274725	0.148352	0.302198	0.335165	0.252747	-0.0549451	-0.0384615	-0.401099	-0.236264	0.346154	-0.424244	0.137363	-0.175824	-0.225275	-0.0274725	0.0879121	-0.197802	-0.445055	-0.379121	-0.181319	-0.164835	0.521978	-0.17033	-0.549451	-0.412088	-0.291209	-0.401099	-0.104396	-0.307692	-0.252747	0.186813	-0.406593	-0.21978	-0.0989011	0.120879
oxoproline	0.252747	0.467033	0.302198	0.181319	-0.192308	-0.0384615	0	0.142857	0.32967	0.428571	-0.631868	0.175824	0.769231	0.0934066	0.450549	-0.478022	-0.505495	0.434066	0.478022	-0.39011	-0.186813	-0.532967	0.456044	0.549451	-0.134987	0.0164835	0.0274725	-0.192308	-0.159341	-0.131868	0.28022	-0.67033	-0.043956	0.0384615	-0.153846	0.0989011	-0.565934	-0.642857	-0.554945	-0.456044	-0.5	-0.598901	0.357143	-0.384615	-0.0164835	-0.532967	-0.60989	-0.653846	-0.104396
phosphoric acid	0.412088	0.489011	0.131868	0.478022	0.269231	-0.379121	0.153846	0.274725	0.291209	0.274725	0.5	0.543956	0.494505	0.697802	0.203297	-0.00549451	0.0659341	-0.368132	0.247253	-0.0384615	0.137363	-0.120879	-0.0714286	0.148352	-0.0881546	0.450549	-0.269231	0.0714286	0.362637	-0.445055	0.010989	-0.252747	-0.32967	-0.335165	-0.467033	-0.208791	-0.0164835	-0.648352	-0.32967	-0.21978	-0.406593	-0.131868	-0.175824	-0.571429	0.631868	-0.192308	-0.252747	-0.214286	0.21978
pyruvic acid	-0.0659341	0.384615	0.142857	0.148352	-0.0384615	0.131868	-0.0164835	0.175824	0.291209	0.395604	0.208791	0.384615	0.0164835	0.203297	-0.192308	-0.021978	0.346154	-0.318681	-0.28022	-0.587912	0.675824	0.00549451	-0.406593	-0.0494506	-0.049587	0.549451	0.186813	0.230769	0.521978	0.274725	-0.0659341	-0.39011	0.0274725	-0.0934066	-0.126374	-0.258242	0.467033	-0.104396	0.258242	0.214286	0.269231	0.0604396	-0.510989	-0.274725	-0.0384615	0.368132	0.0659341	-0.0769231	0.340659
salicylaldehyde	0.274725	-0.417582	-0.906593	0.516484	0.406593	-0.181319	0.554945	0.615385	0.148352	-0.00549451	0.159341	0.010989	-0.313187	-0.324176	0.593407	0.43956	-0.302198	0.593407	0.307692	0.335165	0.131868	-0.263736	-0.137363	0.417582	0.556476	-0.252747	0.653846	0.368132	0.434066	-0.384615	0.0934066	0.159341	0.236264	0.236264	-0.478022	-0.203297	-0.296703	0.192308	-0.192308	-0.467033	-0.208791	0.412088	0.5	0.164835	-0.104396	-0.153846	-0.0604396	0	-0.571429
serine	-0.0879121	0.582418	0.384615	0.252747	-0.236264	-0.17033	-0.214286	-0.148352	0.0989011	0.131868	-0.357143	0.203297	0.785714	0.516484	0.307692	-0.126374	0	0.164835	0.384615	-0.39011	-0.137363	-0.554945	0.153846	0.43956	-0.338844	0.159341	-0.126374	-0.164835	-0.126374	-0.131868	-0.10989	-0.747253	-0.587912	-0.467033	-0.192308	0.208791	-0.214286	-0.824176	-0.478022	-0.21978	-0.472527	-0.357143	-0.164835	-0.60989	0.318681	-0.340659	-0.582418	-0.615385	0.269231
threonic acid	0.175824	0.615385	-0.0164835	0.489011	-0.0549451	-0.32967	0.406593	0.32967	0.10989	-0.10989	0	0.236264	0.43956	0.598901	0.543956	0.0934066	0.0549451	0.247253	0.406593	0.137363	0.181319	-0.17033	-0.104396	0.43956	-0.289257	0.379121	-0.0494506	-0.17033	0.395604	-0.379121	-0.159341	-0.252747	0.120879	0.302198	-0.725275	-0.00549451	-0.401099	-0.549451	-0.60989	-0.681319	-0.659341	-0.357143	-0.17033	-0.318681	0.549451	-0.571429	-0.379121	-0.230769	-0.263736
trans-4-hydroxyproline	0.208791	0.445055	0.532967	-0.175824	0.0164835	0.175824	-0.032967	-0.0274725	0.0934066	0.32967	0.043956	0.10989	-0.010989	0.285714	-0.472527	-0.0989011	0.362637	-0.725275	-0.538462	-0.32967	0.247253	0.417582	-0.0879121	-0.401099	-0.0964191	0.384615	-0.247253	0.010989	-0.010989	0.357143	0.181319	-0.0824176	0.225275	0.126374	0.159341	-0.153846	0.307692	0.032967	0.32967	0.252747	0.252747	-0.379121	-0.505495	-0.0659341	-0.0494506	0.384615	0.197802	0.137363	0.620879
tryptophan	0.186813	0.241758	0.456044	-0.379121	0	0.401099	-0.324176	-0.0824176	0.401099	0.417582	0.208791	0.467033	0.0164835	0.28022	-0.686813	-0.21978	0.318681	-0.82967	-0.648352	-0.659341	0.104396	-0.0274725	-0.373626	-0.653846	-0.15978	0.357143	-0.247253	-0.0549451	-0.0164835	0.423077	-0.164835	-0.274725	0.0274725	-0.175824	0.313187	-0.0879121	0.708791	0	0.587912	0.571429	0.620879	0.010989	-0.483516	-0.21978	0.115385	0.582418	0.450549	0.192308	0.626374
uric acid	0.483516	0.263736	0.131868	0.225275	0.252747	0.258242	-0.0164835	0.0659341	0.258242	0.708791	-0.0494506	0.225275	0.472527	0.192308	0.17033	-0.291209	-0.142857	-0.192308	0.258242	-0.664835	-0.120879	-0.494505	0.0659341	-0.0274725	0.126722	0.131868	0.0659341	-0.214286	0.0659341	0.10989	-0.0549451	-0.653846	-0.324176	-0.373626	0.0604396	-0.252747	-0.0989011	-0.593407	-0.247253	0.021978	-0.17033	-0.274725	0.0769231	-0.450549	0.0879121	-0.104396	-0.412088	-0.521978	0.532967
uridine	0.17033	0.423077	0.307692	0.236264	-0.208791	-0.318681	0.10989	0.0714286	0.472527	0.483516	0.269231	0.582418	0.527473	0.434066	0.142857	-0.456044	-0.010989	-0.0879121	0.384615	-0.346154	0.0769231	-0.17033	0.0164835	0.247253	-0.449038	0.28022	-0.423077	-0.274725	0.263736	-0.0274725	0.186813	-0.291209	-0.307692	-0.313187	-0.0274725	0.197802	-0.137363	-0.714286	-0.412088	-0.269231	-0.241758	-0.115385	-0.0769231	-0.175824	0.225275	-0.43956	-0.137363	-0.0714286	0.021978
QUICKI	-0.230769	0.115385	0.478022	-0.197802	-0.153846	-0.10989	-0.197802	-0.368132	-0.335165	-0.313187	-0.126374	-0.115385	0.28022	0.379121	0.0274725	0.021978	0.230769	-0.225275	0.192308	0.324176	-0.340659	0.104396	0.164835	0.159341	-0.206612	0.0164835	-0.362637	-0.120879	-0.456044	-0.291209	0.131868	0.0934066	-0.631868	-0.505495	0.203297	0.461538	-0.131868	-0.258242	-0.181319	-0.0494506	-0.28022	-0.214286	-0.247253	-0.115385	0.175824	-0.28022	-0.137363	-0.0384615	0.192308
Matsuda	-0.208791	0.115385	0.467033	-0.274725	-0.241758	-0.0714286	-0.21978	-0.450549	-0.379121	-0.263736	-0.258242	-0.21978	0.137363	0.230769	-0.126374	0.131868	0.384615	-0.285714	-0.0274725	0.21978	-0.285714	0.148352	0.0769231	0.0824176	-0.123967	-0.032967	-0.307692	-0.010989	-0.549451	-0.0274725	0.252747	0.0494506	-0.653846	-0.56044	0.401099	0.56044	-0.00549451	-0.131868	0.00549451	0.104396	-0.10989	-0.159341	-0.351648	-0.0274725	-0.0989011	-0.0714286	-0.010989	0.0714286	0.43956
HbA1c	0.186956	-0.172846	-0.0388022	-0.236341	-0.0917143	-0.331583	-0.395077	-0.275143	0.0952418	-0.331583	-0.0352747	-0.0846594	0.0246923	-0.116407	-0.440934	0.0352747	-0.313945	0.0246923	-0.34922	0.232813	-0.677275	-0.074077	0.345692	-0.493846	-0.261951	-0.603198	-0.62789	-0.137571	-0.567923	0.109352	-0.208121	0.197539	0.215176	0.176374	0.0881869	0.0846594	0.109352	0.148154	0.169319	0.261033	0.158736	0.141099	0.380967	0.0599671	0.299835	0.299835	0.257506	0.264561	0.0246923
FSHmIU.mL	-0.258954	-0.0771353	0.385676	-0.247935	-0.223141	-0.195593	-0.352618	-0.724521	-0.385676	-0.187329	-0.0247935	-0.449038	0.0798901	0.0220387	-0.352618	-0.242425	-0.00275483	-0.101929	0.00275483	0.0633611	-0.606063	0.31956	0.520663	-0.407715	-0.498619	-0.473831	-0.743804	-0.586779	-0.586779	0.393941	-0.157025	0.242425	-0.173554	-0.101929	0.493115	0.168045	-0.15978	-0.121213	-0.143251	0.25069	-0.0110193	-0.198348	0.066116	0.308541	0.066116	-0.0578515	-0.0468321	0.110193	0.292012
LHmIU.mL	-0.318681	-0.159341	0.604396	-0.417582	-0.0879121	0.192308	-0.412088	-0.593407	-0.197802	0.137363	-0.032967	-0.252747	0.0604396	0.0384615	-0.417582	-0.39011	0.0274725	-0.362637	-0.0714286	-0.225275	-0.478022	0.285714	0.445055	-0.395604	-0.336089	-0.318681	-0.505495	-0.478022	-0.549451	0.362637	0	0.142857	-0.252747	-0.28022	0.659341	0.120879	0.00549451	-0.0549451	0.0659341	0.346154	0.208791	-0.225275	-0.0494506	0.274725	-0.0989011	0.0714286	0.010989	0.0164835	0.373626
cholmg.dL	-0.423818	0.245184	0.360771	0.0280211	-0.0595447	0.255692	0.18564	-0.0455342	-0.101576	0.0805605	0.0350263	-0.0280211	-0.126095	0.493871	-0.0140105	0.178634	0.59895	-0.276708	-0.101576	-0.322242	0.339755	0.259195	-0.276708	0.0455342	-0.249561	0.294221	0.18564	-0.192645	0.203153	0.227671	-0.147111	-0.0840632	0	0.0490369	-0.00700526	0.0840632	0.0735553	-0.0840632	0.00700526	-0.136603	0.06655	-0.206655	-0.71804	0.189142	-0.0140105	-0.0315237	0.00350263	0	0.206655
HDLmg.dL	-0.524476	0.272727	0.468531	-0.0699301	-0.160839	0.0839161	-0.223776	-0.020979	0	-0.0629371	0.13986	0.188811	0.027972	0.307692	-0.251748	-0.0769231	0.27972	-0.300699	-0.20979	-0.188811	0.573427	0.356643	-0.146853	0.041958	-0.252633	0.496504	0.034965	0.195804	0.258741	-0.013986	-0.104895	-0.048951	0.0769231	0.034965	-0.174825	-0.181818	0.342657	0.0769231	0.244755	0.195804	0.188811	-0.118881	-0.538462	-0.195804	0.132867	0.216783	0.00699301	-0.104895	-0.027972
LDLmg.dL	-0.475524	0.356643	0.307692	0.202797	-0.370629	-0.0909091	0.195804	-0.125874	-0.020979	0.048951	-0.230769	-0.048951	0.230769	0.41958	0.293706	-0.00699301	0.286713	0.314685	0.265734	-0.300699	0.132867	-0.034965	0.00699301	0.440559	-0.533337	0.0699301	0.020979	-0.398601	0.0979021	0.230769	-0.0769231	-0.272727	-0.0839161	0.0769231	-0.0839161	0.335664	-0.321678	-0.440559	-0.398601	-0.468531	-0.237762	-0.272727	-0.384615	0.188811	-0.013986	-0.41958	-0.237762	-0.167832	-0.0909091
triglymg.dL	-0.027972	0.048951	0.0559441	-0.048951	0.328671	0.391608	0.321678	0.0979021	-0.237762	-0.00699301	0.307692	-0.0979021	-0.531469	0.384615	-0.181818	0.503497	0.783217	-0.699301	-0.384615	-0.020979	0.34965	0.454545	-0.559441	-0.342657	0.221054	0.34965	0.293706	0.0839161	0.251748	0.125874	-0.118881	0.223776	0.048951	0.020979	0.034965	-0.104895	0.321678	0.293706	0.307692	0.0979021	0.202797	-0.00699301	-0.783217	0.20979	-0.027972	0.27972	0.272727	0.293706	0.475524
heightcm.	-0.214286	-0.708791	-0.450549	-0.0769231	-0.0274725	-0.197802	0.00549451	-0.142857	-0.0824176	-0.159341	0.357143	-0.0384615	-0.43956	-0.423077	-0.032967	0.186813	0.0604396	0.159341	0.126374	0.324176	-0.120879	0.0164835	-0.159341	0.0604396	0.192838	-0.395604	0.043956	0.197802	-0.0384615	-0.021978	0.181319	0.461538	-0.478022	-0.538462	0.417582	0.373626	0.148352	0.28022	0.164835	0.181319	0.263736	0.774725	0.21978	0.434066	-0.346154	0.0384615	0.368132	0.445055	-0.203297
weightkg.	-0.549451	-0.401099	-0.214286	-0.0989011	-0.307692	-0.291209	-0.252747	-0.428571	0.032967	-0.269231	0.225275	-0.00549451	-0.318681	-0.0494506	-0.335165	0.307692	0.313187	0.153846	-0.21978	-0.10989	-0.28022	-0.142857	-0.21978	-0.197802	-0.385676	-0.549451	-0.236264	-0.120879	-0.197802	0.43956	-0.307692	0.148352	-0.384615	-0.423077	0.373626	0.483516	0.357143	0.0714286	0.230769	0.285714	0.43956	0.71978	-0.142857	0.428571	-0.0714286	0.296703	0.445055	0.461538	0.0549451
BMI	-0.538462	0.0384615	0.0494506	0	-0.296703	-0.230769	-0.175824	-0.368132	0.0384615	-0.302198	0.159341	-0.00549451	-0.0769231	0.362637	-0.269231	0.186813	0.313187	0.104396	-0.208791	-0.21978	-0.247253	-0.0549451	-0.120879	-0.296703	-0.721766	-0.32967	-0.395604	-0.478022	-0.0769231	0.43956	-0.637363	0.00549451	0.0384615	0.0879121	-0.00549451	0.21978	0.181319	-0.142857	-0.010989	0.043956	0.197802	0.225275	-0.324176	0.291209	0.357143	0.131868	0.21978	0.263736	0.010989
DXA..Body Fat	-0.763736	-0.021978	0.291209	-0.351648	-0.604396	0.0879121	-0.373626	-0.758242	-0.467033	-0.494505	-0.21978	-0.351648	0.043956	0.0769231	-0.142857	-0.10989	0.368132	0.192308	0.153846	-0.0604396	-0.263736	-0.021978	-0.0604396	-0.104396	-0.65014	-0.159341	-0.357143	-0.598901	-0.318681	0.395604	-0.510989	0	-0.434066	-0.263736	0.417582	0.532967	0.0384615	-0.137363	-0.131868	0.181319	0.0384615	0.0604396	-0.357143	0.225275	0.0274725	-0.230769	-0.010989	0.0879121	0.0549451
VO2peak(ml.FFM.min)	0.0604396	0.159341	0.126374	0.0494506	0.445055	0.703297	0.10989	0.258242	-0.142857	0.225275	0.0934066	0.0604396	0.021978	0.296703	0.203297	0.0494506	0.263736	-0.434066	0.0824176	-0.252747	0.412088	-0.043956	-0.351648	-0.0384615	0.369147	0.620879	0.532967	0.0604396	0.406593	-0.236264	-0.274725	-0.263736	-0.0824176	-0.0879121	-0.230769	-0.472527	0.159341	-0.032967	0.0549451	0.032967	-0.0714286	-0.252747	-0.428571	-0.412088	0.175824	0.0384615	-0.269231	-0.406593	0.274725
p-values
	199203	199777	199802	211972	213961	214535	217893	223505	223513	225427	225548	226851	228147	232087	235972	268365	281268	288808	299159	309642	402237	415114	1,5-anhydroglucitol	2,3,5-trihydroxypyrazine	2,5-furandicarboxylic acid	2-ketoisocaproic acid	5-hydroxymethyl-2-furoic acid	adenosine-5-phosphate	alphaketoglutaric.acid	arginine..ornithine	aspartic acid	AUC_199773	AUC_199777	AUC_199794	AUC_211972	AUC_213961	AUC_226842	AUC_226848	AUC_232946	AUC_235972	AUC_241882	AUC_271416	AUC_281268	AUC_285340	AUC_295002	AUC_299159	AUC_299211	AUC_369638	AUC_4-hydroxybenzoate
199203	NA	0.437084	0.577975	0.394284	0.174357	0.872544	0.194413	0.0177925	0.0413423	0.0219886	0.615799	0.0607365	0.394284	0.788951	0.459305	0.517131	0.262943	0.459305	0.775195	0.615799	0.747868	0.334386	0.734304	0.886619	0.166695	0.279882	0.667608	0.56558	0.297438	0.324922	0.262943	0.394284	0.415405	0.654517	0.334386	0.315608	0.70739	0.426176	0.747868	0.415405	0.590479	0.553295	0.306447	0.215857	0.667608	0.667608	0.900724	0.694047	0.900724
199777	0.437084	NA	0.0490045	0.482054	0.363675	0.654517	0.872544	0.7615	0.505315	0.404774	0.404774	0.297438	0.0142256	0.0286727	0.775195	0.426176	0.577975	0.541124	0.929012	0.201406	0.279882	0.816628	0.957376	0.505315	0.17958	0.0177925	0.394284	0.680785	0.541124	0.900724	0.872544	0.0251671	0.830542	0.628609	0.215857	0.914856	0.734304	0.020516	0.297438	0.404774	0.187574	0.0112252	0.13286	0.0437926	0.297438	0.459305	0.223316	0.23093	0.262943
199802	0.577975	0.0490045	NA	0.149749	0.279882	0.426176	0.0672917	0.143971	0.985787	0.628609	0.288583	0.70739	0.0325244	0.138342	0.223316	0.0345861	0.844502	0.0984901	0.72081	0.155675	0.577975	0.830542	0.324922	0.517131	0.0664057	0.279882	0.0546465	0.194413	0.155675	0.628609	0.900724	0.215857	0.553295	0.603088	0.363675	0.72081	0.775195	0.187574	0.985787	0.426176	0.985787	0.0153485	0.2387	0.208554	0.459305	0.886619	0.529068	0.315608	0.149749
211972	0.394284	0.482054	0.149749	NA	0.0743289	0.0463459	0.00873032	0.0286727	0.734304	0.315608	0.223316	0.788951	0.654517	0.246625	0.00266608	0.187574	0.775195	0.306447	0.0576344	0.577975	0.262943	0.886619	0.577975	0.0177925	0.398167	0.858504	0.271335	0.404774	0.0191181	0.117283	0.415405	0.844502	0.971578	0.802763	0.00237662	0.138342	0.0463459	0.13286	0.0153485	0.00332674	0.00731857	0.70739	0.654517	0.747868	0.505315	0.2387	0.0437926	0.2387	0.615799
213961	0.174357	0.363675	0.279882	0.0743289	NA	0.694047	0.180889	0.0251671	0.734304	0.180889	0.0490045	0.70739	0.734304	0.505315	0.174357	0.415405	0.415405	0.383936	0.426176	0.641516	0.788951	0.816628	0.654517	0.816628	0.0138678	0.900724	0.107609	0.334386	0.161751	0.0235382	0.816628	0.603088	0.802763	0.957376	0.0984901	0.00211223	0.541124	1	0.654517	0.394284	0.415405	0.929012	0.394284	0.603088	0.334386	0.886619	0.324922	0.279882	0.886619
214535	0.872544	0.654517	0.426176	0.0463459	0.694047	NA	0.404774	0.802763	0.830542	0.529068	0.448127	0.943186	0.775195	0.603088	0.470615	0.315608	0.830542	0.167978	0.541124	0.161751	0.971578	0.553295	0.334386	0.155675	0.403435	0.324922	0.271335	0.56558	0.7615	0.603088	0.334386	0.493622	0.900724	0.914856	0.223316	0.615799	0.262943	0.394284	0.180889	0.155675	0.187574	0.641516	0.553295	0.603088	0.667608	0.541124	0.734304	0.615799	0.415405
217893	0.194413	0.872544	0.0672917	0.00873032	0.180889	0.404774	NA	0.0121662	0.971578	0.437084	0.215857	1	0.373733	0.70739	0.00668179	0.23093	0.615799	0.529068	0.122332	0.215857	0.0984901	0.306447	0.529068	0.0818642	0.237317	0.517131	0.161751	0.654517	0.00410771	0.324922	0.187574	0.315608	0.394284	0.262943	0.0818642	0.541124	0.0639549	0.830542	0.0899131	0.00111365	0.070749	0.886619	1	0.271335	0.70739	0.0941347	0.577975	0.694047	0.334386
223505	0.0177925	0.7615	0.143971	0.0286727	0.0251671	0.802763	0.0121662	NA	0.0576344	0.0639549	0.23093	0.070749	0.957376	0.734304	0.0517706	0.70739	0.324922	0.929012	0.448127	0.830542	0.0639549	0.788951	0.654517	0.122332	0.0350228	0.194413	0.0367413	0.070749	0.00332674	0.0268778	0.155675	0.872544	0.180889	0.324922	0.00668179	0.0639549	0.482054	0.844502	0.56558	0.0463459	0.344	0.929012	0.394284	0.459305	0.7615	0.641516	0.615799	0.541124	0.201406
223513	0.0413423	0.505315	0.985787	0.734304	0.734304	0.830542	0.971578	0.0576344	NA	0.0165367	0.553295	1.39755e-05	0.215857	0.577975	0.816628	0.2387	0.167978	0.680785	0.680785	0.0672917	0.900724	0.0576344	0.70739	0.957376	0.957259	0.577975	0.914856	0.603088	0.448127	0.654517	0.56558	0.143971	0.470615	0.957376	0.470615	0.734304	0.505315	0.306447	0.70739	0.802763	0.505315	0.747868	0.373733	0.23093	0.448127	0.734304	0.517131	0.872544	0.628609
225427	0.0219886	0.404774	0.628609	0.315608	0.180889	0.529068	0.437084	0.0639549	0.0165367	NA	0.694047	0.0463459	0.180889	0.590479	0.459305	0.161751	0.297438	0.394284	0.493622	0.0235382	0.553295	0.334386	0.734304	0.56558	0.362299	0.334386	0.493622	0.802763	0.262943	0.70739	0.174357	0.0941347	0.957376	0.654517	0.734304	0.208554	0.667608	0.122332	0.590479	0.505315	0.734304	0.334386	0.529068	0.262943	0.900724	0.747868	0.373733	0.161751	0.505315
225548	0.615799	0.404774	0.288583	0.223316	0.0490045	0.448127	0.215857	0.23093	0.553295	0.694047	NA	0.262943	0.297438	0.271335	0.914856	0.470615	0.654517	0.194413	0.858504	0.404774	0.529068	0.279882	0.459305	0.529068	0.747193	0.72081	0.802763	0.802763	0.0437926	0.288583	0.72081	0.0899131	0.858504	0.886619	0.306447	0.194413	0.628609	0.900724	1	0.734304	0.914856	0.187574	0.830542	0.590479	0.149749	0.830542	0.437084	0.271335	0.628609
226851	0.0607365	0.297438	0.70739	0.788951	0.70739	0.943186	1	0.070749	1.39755e-05	0.0463459	0.262943	NA	0.161751	0.201406	0.802763	0.271335	0.493622	0.254706	0.7615	0.127524	0.590479	0.107609	0.344	1	0.865152	0.13286	0.775195	0.577975	0.254706	0.363675	0.7615	0.167978	0.872544	0.667608	0.363675	0.7615	0.288583	0.208554	0.694047	0.900724	0.615799	0.7615	0.929012	0.0780333	0.174357	0.844502	0.505315	0.914856	0.816628
228147	0.394284	0.0142256	0.0325244	0.654517	0.734304	0.775195	0.373733	0.957376	0.215857	0.180889	0.297438	0.161751	NA	0.0899131	0.482054	0.0345861	0.143971	0.985787	0.194413	0.13286	0.448127	0.0858235	0.127524	0.344	0.261546	0.394284	0.279882	0.394284	0.603088	0.353764	0.929012	0.00502324	0.459305	0.56558	0.426176	0.830542	0.306447	0.000266012	0.0899131	0.470615	0.0984901	0.0165367	0.615799	0.00410771	0.107609	0.167978	0.0268778	0.0060883	0.72081
232087	0.788951	0.0286727	0.138342	0.246625	0.505315	0.603088	0.70739	0.734304	0.577975	0.590479	0.271335	0.201406	0.0899131	NA	0.641516	0.886619	0.334386	0.127524	0.628609	0.529068	0.971578	0.914856	0.886619	0.943186	0.169859	0.201406	0.262943	0.334386	0.493622	0.394284	0.373733	0.353764	0.493622	0.641516	0.127524	0.654517	0.816628	0.0095095	0.208554	0.288583	0.180889	0.180889	0.0899131	0.174357	0.00237662	0.482054	0.344	0.426176	0.315608
235972	0.459305	0.775195	0.223316	0.00266608	0.174357	0.470615	0.00668179	0.0517706	0.816628	0.459305	0.914856	0.802763	0.482054	0.641516	NA	0.628609	0.448127	0.0780333	0.000147448	0.344	0.493622	0.802763	0.470615	0.000530223	0.241257	0.788951	0.0899131	0.816628	0.0858235	0.0305541	0.306447	0.872544	0.816628	0.788951	0.0325244	0.437084	0.000723608	0.167978	0.000723608	7.54456e-05	0.00022022	0.353764	0.334386	0.858504	0.914856	0.00370131	0.00668179	0.0941347	0.187574
268365	0.517131	0.426176	0.0345861	0.187574	0.415405	0.315608	0.23093	0.70739	0.2387	0.161751	0.470615	0.271335	0.0345861	0.886619	0.628609	NA	0.0607365	0.747868	0.505315	0.155675	0.529068	0.529068	0.215857	0.680785	0.27848	0.459305	0.180889	0.13286	0.553295	0.943186	0.858504	0.315608	0.641516	0.747868	0.426176	0.872544	0.734304	0.297438	0.680785	0.70739	0.971578	0.107609	0.297438	0.353764	0.72081	0.297438	0.603088	0.315608	0.641516
281268	0.262943	0.577975	0.844502	0.775195	0.415405	0.830542	0.615799	0.324922	0.167978	0.297438	0.654517	0.493622	0.143971	0.334386	0.448127	0.0607365	NA	0.201406	0.254706	0.929012	0.279882	0.2387	0.0131656	0.505315	0.52791	0.394284	0.900724	0.872544	0.667608	0.127524	0.517131	0.641516	0.344	0.482054	0.482054	0.201406	0.201406	0.667608	0.437084	0.615799	0.517131	0.517131	9.90624e-06	0.373733	0.667608	0.493622	0.2387	0.0941347	0.0607365
288808	0.459305	0.541124	0.0984901	0.306447	0.383936	0.167978	0.529068	0.929012	0.680785	0.394284	0.194413	0.254706	0.985787	0.127524	0.0780333	0.747868	0.201406	NA	0.117283	0.373733	0.7615	0.505315	0.297438	0.0367413	0.957259	0.0984901	0.448127	0.985787	0.957376	0.900724	0.70739	0.943186	0.72081	0.404774	0.553295	0.517131	0.0463459	0.957376	0.122332	0.127524	0.223316	0.734304	0.0639549	0.363675	0.334386	0.161751	0.306447	0.641516	0.0305541
299159	0.775195	0.929012	0.72081	0.0576344	0.426176	0.541124	0.122332	0.448127	0.680785	0.493622	0.858504	0.7615	0.194413	0.628609	0.000147448	0.505315	0.254706	0.117283	NA	0.448127	0.844502	0.802763	0.155675	0.0112252	0.809173	0.971578	0.654517	0.394284	0.363675	0.0639549	0.517131	0.971578	0.415405	0.802763	0.279882	0.694047	0.000319071	0.0546465	3.48098e-05	0.00454773	0.000450287	0.262943	0.201406	0.929012	0.680785	4.56544e-05	0.00410771	0.0818642	0.180889
309642	0.615799	0.201406	0.155675	0.577975	0.641516	0.161751	0.215857	0.830542	0.0672917	0.0235382	0.404774	0.127524	0.13286	0.529068	0.344	0.155675	0.929012	0.373733	0.448127	NA	0.914856	0.0437926	0.694047	0.437084	0.475073	0.517131	0.914856	0.493622	0.816628	0.138342	0.505315	0.000968779	0.747868	0.459305	0.493622	0.886619	0.262943	0.167978	0.553295	0.306447	0.297438	0.541124	0.553295	0.143971	0.900724	0.404774	0.900724	0.262943	0.0818642
402237	0.747868	0.279882	0.577975	0.262943	0.788951	0.971578	0.0984901	0.0639549	0.900724	0.553295	0.529068	0.590479	0.448127	0.971578	0.493622	0.529068	0.279882	0.7615	0.844502	0.914856	NA	0.23093	0.138342	0.271335	0.269935	0.0060883	0.0818642	0.0607365	0.00145419	0.747868	0.279882	1	0.344	0.404774	0.167978	0.315608	0.680785	0.553295	0.775195	0.541124	0.844502	0.957376	0.187574	0.747868	0.404774	0.816628	0.985787	0.914856	0.872544
415114	0.334386	0.816628	0.830542	0.886619	0.816628	0.553295	0.306447	0.788951	0.0576344	0.334386	0.279882	0.107609	0.0858235	0.914856	0.802763	0.529068	0.2387	0.505315	0.802763	0.0437926	0.23093	NA	0.72081	0.816628	0.985748	0.734304	0.667608	0.886619	0.529068	0.900724	0.448127	0.00410771	0.344	0.246625	0.985787	0.603088	0.694047	0.155675	0.985787	0.802763	0.802763	0.694047	0.353764	0.0672917	0.553295	1	0.7615	0.215857	0.858504
1,5-anhydroglucitol	0.734304	0.957376	0.324922	0.577975	0.654517	0.334386	0.529068	0.654517	0.70739	0.734304	0.459305	0.344	0.127524	0.886619	0.470615	0.215857	0.0131656	0.297438	0.155675	0.694047	0.138342	0.72081	NA	0.383936	0.767717	0.155675	0.415405	0.590479	0.194413	0.373733	0.426176	0.971578	0.943186	0.788951	0.816628	0.383936	0.0235382	0.363675	0.0984901	0.470615	0.117283	0.0780333	0.0305541	0.858504	0.775195	0.324922	0.0235382	0.0546465	0.517131
2,3,5-trihydroxypyrazine	0.886619	0.505315	0.517131	0.0177925	0.816628	0.155675	0.0818642	0.122332	0.957376	0.56558	0.529068	1	0.344	0.943186	0.000530223	0.680785	0.505315	0.0367413	0.0112252	0.437084	0.271335	0.816628	0.383936	NA	0.382577	0.7615	0.143971	0.2387	0.262943	0.0780333	0.0305541	0.615799	0.541124	0.830542	0.112376	0.929012	0.0131656	0.223316	0.0191181	0.00332674	0.0060883	0.482054	0.448127	0.72081	0.482054	0.0389926	0.0268778	0.138342	0.23093
2,5-furandicarboxylic acid	0.166695	0.17958	0.0664057	0.398167	0.0138678	0.403435	0.237317	0.0350228	0.957259	0.362299	0.747193	0.865152	0.261546	0.169859	0.241257	0.27848	0.52791	0.957259	0.809173	0.475073	0.269935	0.985748	0.767717	0.382577	NA	0.788381	0.000582305	0.00708864	0.314209	0.13167	0.137135	0.720067	0.935921	0.781478	0.558322	0.134384	0.900452	0.19308	0.570687	0.844078	0.935921	0.552182	0.309608	0.747193	0.207201	0.546071	0.740385	0.552182	0.865152
2-ketoisocaproic acid	0.279882	0.0177925	0.279882	0.858504	0.900724	0.324922	0.517131	0.194413	0.577975	0.334386	0.72081	0.13286	0.394284	0.201406	0.788951	0.459305	0.394284	0.0984901	0.971578	0.517131	0.0060883	0.734304	0.155675	0.7615	0.788381	NA	0.628609	0.577975	0.0437926	0.470615	0.7615	0.315608	0.680785	0.72081	0.254706	0.383936	0.529068	0.541124	0.943186	0.802763	0.667608	0.201406	0.0818642	0.0607365	0.541124	0.747868	0.747868	0.56558	0.603088
5-hydroxymethyl-2-furoic acid	0.667608	0.394284	0.0546465	0.271335	0.107609	0.271335	0.161751	0.0367413	0.914856	0.493622	0.802763	0.775195	0.279882	0.262943	0.0899131	0.180889	0.900724	0.448127	0.654517	0.914856	0.0818642	0.667608	0.415405	0.143971	0.000582305	0.628609	NA	0.0325244	0.117283	0.334386	0.437084	0.788951	0.802763	0.914856	0.324922	0.2387	0.816628	0.306447	0.816628	0.493622	0.830542	0.603088	0.734304	0.844502	0.167978	0.7615	0.529068	0.373733	0.641516
adenosine-5-phosphate	0.56558	0.680785	0.194413	0.404774	0.334386	0.56558	0.654517	0.070749	0.603088	0.802763	0.802763	0.577975	0.394284	0.334386	0.816628	0.13286	0.872544	0.985787	0.394284	0.493622	0.0607365	0.886619	0.590479	0.2387	0.00708864	0.577975	0.0325244	NA	0.363675	0.23093	0.0607365	0.929012	0.957376	0.680785	0.353764	0.470615	0.404774	0.201406	0.201406	0.830542	0.667608	0.262943	0.775195	0.470615	0.262943	0.117283	0.734304	0.971578	0.872544
alphaketoglutaric.acid	0.297438	0.541124	0.155675	0.0191181	0.161751	0.7615	0.00410771	0.00332674	0.448127	0.262943	0.0437926	0.254706	0.603088	0.493622	0.0858235	0.553295	0.667608	0.957376	0.363675	0.816628	0.00145419	0.529068	0.194413	0.262943	0.314209	0.0437926	0.117283	0.363675	NA	0.271335	0.680785	0.802763	0.288583	0.324922	0.0153485	0.0941347	0.70739	0.816628	0.426176	0.0858235	0.353764	0.858504	0.628609	0.886619	0.70739	0.493622	0.70739	0.971578	0.363675
arginine..ornithine	0.324922	0.900724	0.628609	0.117283	0.0235382	0.603088	0.324922	0.0268778	0.654517	0.70739	0.288583	0.363675	0.353764	0.394284	0.0305541	0.943186	0.127524	0.900724	0.0639549	0.138342	0.747868	0.900724	0.373733	0.0780333	0.13167	0.470615	0.334386	0.23093	0.271335	NA	0.394284	0.734304	0.886619	0.914856	0.0165367	0.127524	0.194413	0.517131	0.194413	0.0899131	0.0490045	0.603088	0.208554	0.180889	0.155675	0.223316	0.127524	0.143971	0.112376
aspartic acid	0.262943	0.872544	0.900724	0.415405	0.816628	0.334386	0.187574	0.155675	0.56558	0.174357	0.72081	0.7615	0.929012	0.373733	0.306447	0.858504	0.517131	0.70739	0.517131	0.505315	0.279882	0.448127	0.426176	0.0305541	0.137135	0.7615	0.437084	0.0607365	0.680785	0.394284	NA	0.7615	0.957376	0.830542	1	0.802763	0.254706	0.957376	0.667608	0.246625	0.437084	0.667608	0.373733	0.788951	0.0463459	0.541124	0.680785	0.914856	0.70739
AUC_199773	0.394284	0.0251671	0.215857	0.844502	0.603088	0.493622	0.315608	0.872544	0.143971	0.0941347	0.0899131	0.167978	0.00502324	0.353764	0.872544	0.315608	0.641516	0.943186	0.971578	0.000968779	1	0.00410771	0.971578	0.615799	0.720067	0.315608	0.788951	0.929012	0.802763	0.734304	0.7615	NA	0.448127	0.394284	0.734304	0.943186	0.788951	0.0235382	0.7615	0.858504	0.7615	0.208554	0.7615	0.00298223	0.641516	0.943186	0.201406	0.020516	0.149749
AUC_199777	0.415405	0.830542	0.553295	0.971578	0.802763	0.900724	0.394284	0.180889	0.470615	0.957376	0.858504	0.872544	0.459305	0.493622	0.816628	0.641516	0.344	0.72081	0.415405	0.747868	0.344	0.344	0.943186	0.541124	0.935921	0.680785	0.802763	0.957376	0.288583	0.886619	0.957376	0.448127	NA	6.36372e-07	0.23093	0.149749	0.872544	0.194413	0.70739	0.628609	0.72081	0.603088	0.482054	0.541124	0.914856	0.788951	0.541124	0.56558	0.112376
AUC_199794	0.654517	0.628609	0.603088	0.802763	0.957376	0.914856	0.262943	0.324922	0.957376	0.654517	0.886619	0.667608	0.56558	0.641516	0.788951	0.747868	0.482054	0.404774	0.802763	0.459305	0.404774	0.246625	0.788951	0.830542	0.781478	0.72081	0.914856	0.680785	0.324922	0.914856	0.830542	0.394284	6.36372e-07	NA	0.167978	0.262943	0.415405	0.334386	0.747868	0.306447	0.734304	0.344	0.603088	0.426176	0.844502	0.667608	0.914856	0.680785	0.0818642
AUC_211972	0.334386	0.215857	0.363675	0.00237662	0.0984901	0.223316	0.0818642	0.00668179	0.470615	0.734304	0.306447	0.363675	0.426176	0.127524	0.0325244	0.426176	0.482054	0.553295	0.279882	0.493622	0.167978	0.985787	0.816628	0.112376	0.558322	0.254706	0.324922	0.353764	0.0153485	0.0165367	1	0.734304	0.23093	0.167978	NA	0.0325244	0.2387	0.324922	0.117283	0.0191181	0.0325244	0.426176	0.7615	0.201406	0.0639549	0.415405	0.117283	0.194413	0.215857
AUC_213961	0.315608	0.914856	0.72081	0.138342	0.00211223	0.615799	0.541124	0.0639549	0.734304	0.208554	0.194413	0.7615	0.830542	0.654517	0.437084	0.872544	0.201406	0.517131	0.694047	0.886619	0.315608	0.603088	0.383936	0.929012	0.134384	0.383936	0.2387	0.470615	0.0941347	0.127524	0.802763	0.943186	0.149749	0.262943	0.0325244	NA	0.694047	0.985787	0.734304	0.70739	0.482054	0.344	0.448127	0.246625	0.246625	0.694047	0.161751	0.0858235	0.775195
AUC_226842	0.70739	0.734304	0.775195	0.0463459	0.541124	0.262943	0.0639549	0.482054	0.505315	0.667608	0.628609	0.288583	0.306447	0.816628	0.000723608	0.734304	0.201406	0.0463459	0.000319071	0.262943	0.680785	0.694047	0.0235382	0.0131656	0.900452	0.529068	0.816628	0.404774	0.70739	0.194413	0.254706	0.788951	0.872544	0.415405	0.2387	0.694047	NA	0.149749	1.92962e-05	0.000450287	9.52891e-05	0.0672917	0.13286	0.615799	1	0.000450287	0.00410771	0.138342	0.194413
AUC_226848	0.426176	0.020516	0.187574	0.13286	1	0.394284	0.830542	0.844502	0.306447	0.122332	0.900724	0.208554	0.000266012	0.0095095	0.167978	0.297438	0.667608	0.957376	0.0546465	0.167978	0.553295	0.155675	0.363675	0.223316	0.19308	0.541124	0.306447	0.201406	0.816628	0.517131	0.957376	0.0235382	0.194413	0.334386	0.324922	0.985787	0.149749	NA	0.00800072	0.122332	0.0251671	0.0780333	0.929012	0.0818642	0.0899131	0.0546465	0.0251671	0.0437926	0.493622
AUC_232946	0.747868	0.297438	0.985787	0.0153485	0.654517	0.180889	0.0899131	0.56558	0.70739	0.590479	1	0.694047	0.0899131	0.208554	0.000723608	0.680785	0.437084	0.122332	3.48098e-05	0.553295	0.775195	0.985787	0.0984901	0.0191181	0.570687	0.943186	0.816628	0.201406	0.426176	0.194413	0.667608	0.7615	0.70739	0.747868	0.117283	0.734304	1.92962e-05	0.00800072	NA	0.000380208	2.9987e-06	0.070749	0.437084	0.914856	0.373733	5.90575e-05	0.0016525	0.0941347	0.373733
AUC_235972	0.415405	0.404774	0.426176	0.00332674	0.394284	0.155675	0.00111365	0.0463459	0.802763	0.505315	0.734304	0.900724	0.470615	0.288583	7.54456e-05	0.70739	0.615799	0.127524	0.00454773	0.306447	0.541124	0.802763	0.470615	0.00332674	0.844078	0.802763	0.493622	0.830542	0.0858235	0.0899131	0.246625	0.858504	0.628609	0.306447	0.0191181	0.70739	0.000450287	0.122332	0.000380208	NA	0.000450287	0.2387	0.529068	0.734304	0.654517	0.00187136	0.0576344	0.404774	0.122332
AUC_241882	0.590479	0.187574	0.985787	0.00731857	0.415405	0.187574	0.070749	0.344	0.505315	0.734304	0.914856	0.615799	0.0984901	0.180889	0.00022022	0.971578	0.517131	0.223316	0.000450287	0.297438	0.844502	0.802763	0.117283	0.0060883	0.935921	0.667608	0.830542	0.667608	0.353764	0.0490045	0.437084	0.7615	0.72081	0.734304	0.0325244	0.482054	9.52891e-05	0.0251671	2.9987e-06	0.000450287	NA	0.0345861	0.577975	0.529068	0.373733	0.00111365	0.000319071	0.0463459	0.493622
AUC_271416	0.553295	0.0112252	0.0153485	0.70739	0.929012	0.641516	0.886619	0.929012	0.747868	0.334386	0.187574	0.7615	0.0165367	0.180889	0.353764	0.107609	0.517131	0.734304	0.262943	0.541124	0.957376	0.694047	0.0780333	0.482054	0.552182	0.201406	0.603088	0.262943	0.858504	0.603088	0.667608	0.208554	0.603088	0.344	0.426176	0.344	0.0672917	0.0780333	0.070749	0.2387	0.0345861	NA	0.858504	0.187574	0.470615	0.117283	0.0095095	0.0191181	0.590479
AUC_281268	0.306447	0.13286	0.2387	0.654517	0.394284	0.553295	1	0.394284	0.373733	0.529068	0.830542	0.929012	0.615799	0.0899131	0.334386	0.297438	9.90624e-06	0.0639549	0.201406	0.553295	0.187574	0.353764	0.0305541	0.448127	0.309608	0.0818642	0.734304	0.775195	0.628609	0.208554	0.373733	0.7615	0.482054	0.603088	0.7615	0.448127	0.13286	0.929012	0.437084	0.529068	0.577975	0.858504	NA	0.929012	0.830542	0.459305	0.459305	0.394284	0.0345861
AUC_285340	0.215857	0.0437926	0.208554	0.747868	0.603088	0.603088	0.271335	0.459305	0.23093	0.262943	0.590479	0.0780333	0.00410771	0.174357	0.858504	0.353764	0.373733	0.363675	0.929012	0.143971	0.747868	0.0672917	0.858504	0.72081	0.747193	0.0607365	0.844502	0.470615	0.886619	0.180889	0.788951	0.00298223	0.541124	0.426176	0.201406	0.246625	0.615799	0.0818642	0.914856	0.734304	0.529068	0.187574	0.929012	NA	0.107609	0.816628	0.161751	0.0103404	0.363675
AUC_295002	0.667608	0.297438	0.459305	0.505315	0.334386	0.667608	0.70739	0.7615	0.448127	0.900724	0.149749	0.174357	0.107609	0.00237662	0.914856	0.72081	0.667608	0.334386	0.680785	0.900724	0.404774	0.553295	0.775195	0.482054	0.207201	0.541124	0.167978	0.262943	0.70739	0.155675	0.0463459	0.641516	0.914856	0.844502	0.0639549	0.246625	1	0.0899131	0.373733	0.654517	0.373733	0.470615	0.830542	0.107609	NA	0.654517	0.517131	0.426176	0.858504
AUC_299159	0.667608	0.459305	0.886619	0.2387	0.886619	0.541124	0.0941347	0.641516	0.734304	0.747868	0.830542	0.844502	0.167978	0.482054	0.00370131	0.297438	0.493622	0.161751	4.56544e-05	0.404774	0.816628	1	0.324922	0.0389926	0.546071	0.747868	0.7615	0.117283	0.493622	0.223316	0.541124	0.943186	0.788951	0.667608	0.415405	0.694047	0.000450287	0.0546465	5.90575e-05	0.00187136	0.00111365	0.117283	0.459305	0.816628	0.654517	NA	0.0463459	0.353764	0.155675
AUC_299211	0.900724	0.223316	0.529068	0.0437926	0.324922	0.734304	0.577975	0.615799	0.517131	0.373733	0.437084	0.505315	0.0268778	0.344	0.00668179	0.603088	0.2387	0.306447	0.00410771	0.900724	0.985787	0.7615	0.0235382	0.0268778	0.740385	0.747868	0.529068	0.734304	0.70739	0.127524	0.680785	0.201406	0.541124	0.914856	0.117283	0.161751	0.00410771	0.0251671	0.0016525	0.0576344	0.000319071	0.0095095	0.459305	0.161751	0.517131	0.0463459	NA	4.56544e-05	0.971578
AUC_369638	0.694047	0.23093	0.315608	0.2387	0.279882	0.615799	0.694047	0.541124	0.872544	0.161751	0.271335	0.914856	0.0060883	0.426176	0.0941347	0.315608	0.0941347	0.641516	0.0818642	0.262943	0.914856	0.215857	0.0546465	0.138342	0.552182	0.56558	0.373733	0.971578	0.971578	0.143971	0.914856	0.020516	0.56558	0.680785	0.194413	0.0858235	0.138342	0.0437926	0.0941347	0.404774	0.0463459	0.0191181	0.394284	0.0103404	0.426176	0.353764	4.56544e-05	NA	0.775195
AUC_4-hydroxybenzoate	0.900724	0.262943	0.149749	0.615799	0.886619	0.415405	0.334386	0.201406	0.628609	0.505315	0.628609	0.816628	0.72081	0.315608	0.187574	0.641516	0.0607365	0.0305541	0.180889	0.0818642	0.872544	0.858504	0.517131	0.23093	0.865152	0.603088	0.641516	0.872544	0.363675	0.112376	0.70739	0.149749	0.112376	0.0818642	0.215857	0.775195	0.194413	0.493622	0.373733	0.122332	0.493622	0.590479	0.0345861	0.363675	0.858504	0.155675	0.971578	0.775195	NA
AUC_alphaketoglutaric.acid	0.0639549	0.353764	0.56558	0.0984901	0.70739	0.482054	0.0153485	0.174357	0.734304	0.180889	0.324922	0.459305	0.529068	0.654517	0.0413423	0.553295	0.985787	0.858504	0.0235382	0.654517	0.223316	0.788951	0.72081	0.143971	0.673332	0.143971	0.914856	0.830542	0.0345861	0.383936	0.194413	0.985787	0.788951	0.971578	0.415405	0.872544	0.122332	0.149749	0.0413423	0.0517706	0.0517706	0.56558	0.844502	0.886619	0.971578	0.0131656	0.353764	0.872544	0.694047
AUC_arachidic acid	0.0941347	0.553295	0.615799	0.00800072	0.0153485	0.167978	0.0984901	0.0016525	0.0899131	0.0858235	0.0818642	0.13286	0.493622	0.254706	0.167978	0.957376	0.149749	0.858504	0.437084	0.734304	0.363675	0.654517	0.288583	0.254706	0.362299	0.577975	0.641516	0.254706	0.0546465	0.0251671	0.215857	0.886619	0.194413	0.324922	0.00332674	0.0131656	0.262943	0.404774	0.271335	0.0576344	0.167978	0.482054	0.271335	0.470615	0.215857	0.70739	0.297438	0.353764	0.315608
AUC_arginine..ornithine	0.279882	0.143971	0.872544	0.844502	0.208554	0.886619	0.900724	0.72081	0.0268778	0.0672917	0.426176	0.0941347	0.394284	0.830542	0.72081	0.641516	0.694047	0.900724	0.517131	0.00454773	0.667608	0.070749	0.262943	0.858504	0.475073	0.680785	0.929012	0.914856	0.747868	0.0780333	0.680785	0.0165367	0.914856	0.70739	0.680785	0.288583	0.529068	0.201406	0.830542	0.985787	0.505315	0.872544	0.603088	0.628609	0.493622	0.775195	0.590479	0.886619	0.279882
AUC_aspartic acid	0.271335	0.858504	0.985787	0.262943	0.448127	0.641516	0.143971	0.161751	0.957376	0.117283	0.553295	0.858504	0.641516	0.493622	0.0672917	0.747868	0.373733	0.615799	0.13286	0.529068	0.394284	0.529068	0.194413	0.0095095	0.0664057	0.734304	0.2387	0.161751	0.680785	0.201406	4.60744e-06	0.957376	0.734304	0.747868	0.844502	0.816628	0.0517706	0.72081	0.254706	0.117283	0.117283	0.262943	0.288583	0.985787	0.0818642	0.223316	0.149749	0.306447	0.788951
AUC_behenic acid	0.0268778	0.315608	0.0219886	0.297438	0.0463459	0.628609	0.0899131	0.00553612	0.279882	0.603088	0.149749	0.493622	0.262943	0.373733	0.517131	0.603088	0.155675	0.830542	0.900724	0.187574	0.505315	0.667608	0.929012	0.971578	0.0443384	0.957376	0.279882	0.149749	0.138342	0.155675	0.383936	0.187574	0.0191181	0.070749	0.117283	0.0818642	0.747868	0.201406	0.788951	0.415405	0.985787	0.482054	0.070749	0.72081	0.900724	0.788951	0.541124	0.529068	0.0899131
AUC_cystine	0.816628	0.155675	0.0325244	1	0.7615	0.985787	0.70739	0.788951	0.288583	0.971578	0.174357	0.383936	0.180889	0.334386	0.306447	0.459305	1	0.914856	0.23093	0.482054	0.886619	0.271335	0.112376	0.180889	0.666738	0.505315	0.615799	0.541124	0.459305	0.394284	0.187574	0.971578	0.788951	0.775195	0.886619	0.70739	0.0463459	0.334386	0.112376	0.155675	0.0413423	0.0016525	0.694047	0.816628	0.957376	0.0672917	0.0818642	0.254706	0.900724
AUC_fumaric acid	0.680785	0.426176	0.353764	0.844502	0.816628	0.279882	0.615799	0.667608	0.747868	0.102981	0.775195	0.529068	0.914856	0.437084	0.279882	0.858504	0.0858235	0.020516	0.271335	0.0177925	0.517131	0.72081	0.215857	0.334386	0.788381	0.306447	0.886619	0.816628	0.872544	0.161751	0.929012	0.138342	0.138342	0.0490045	0.271335	0.929012	0.0941347	0.529068	0.279882	0.143971	0.288583	0.943186	0.0517706	0.383936	0.667608	0.143971	0.7615	0.858504	7.54456e-05
AUC_gamma-tocopherol	0.180889	0.72081	0.505315	0.844502	0.517131	0.344	0.72081	0.667608	0.215857	0.143971	0.246625	0.271335	0.775195	0.493622	0.315608	0.353764	0.577975	0.383936	0.459305	0.112376	0.667608	0.493622	0.415405	0.0818642	0.634108	0.628609	0.914856	0.929012	0.334386	0.383936	0.383936	0.577975	0.448127	0.886619	0.775195	0.149749	0.161751	0.788951	0.288583	0.149749	0.149749	0.404774	0.628609	0.603088	0.858504	0.246625	0.437084	0.872544	0.615799
AUC_glutamineminor	0.802763	0.2387	0.541124	0.0607365	0.426176	0.315608	0.505315	0.943186	0.482054	0.56558	0.344	0.971578	0.0984901	0.0743289	0.0858235	0.816628	0.900724	0.788951	0.0131656	0.70739	0.788951	0.7615	0.373733	0.187574	0.858118	0.344	0.603088	0.667608	0.383936	0.149749	0.816628	0.667608	0.0743289	0.194413	0.297438	0.482054	0.138342	0.0121662	0.0121662	0.223316	0.0060883	0.23093	0.775195	0.23093	0.208554	0.0672917	0.0131656	0.107609	0.56558
AUC_glycine	0.577975	0.0389926	0.802763	0.0858235	0.802763	0.641516	0.0941347	0.2387	0.459305	0.155675	0.2387	0.7615	0.288583	0.315608	0.0780333	0.816628	0.747868	0.344	0.383936	0.254706	0.344	0.603088	0.929012	0.0413423	0.802229	0.553295	0.394284	0.900724	0.344	0.788951	0.315608	0.0941347	0.72081	0.505315	0.246625	0.858504	0.112376	0.0899131	0.0941347	0.0165367	0.112376	0.112376	0.577975	0.830542	0.641516	0.223316	0.149749	0.271335	0.775195
AUC_histidine	0.641516	0.654517	0.437084	0.223316	0.324922	0.324922	0.394284	0.373733	0.603088	0.886619	0.667608	0.459305	0.70739	0.426176	0.0984901	0.415405	0.0142256	0.127524	0.0437926	0.0672917	0.943186	0.353764	0.0235382	0.271335	0.521916	0.7615	0.900724	0.971578	0.482054	0.0672917	0.517131	0.254706	0.194413	0.112376	0.143971	0.0818642	0.0191181	0.971578	0.0743289	0.161751	0.0546465	0.373733	0.0112252	0.914856	0.694047	0.107609	0.0941347	0.306447	0.0177925
AUC_isolinoleic acid	0.802763	0.72081	0.187574	0.122332	0.0576344	0.802763	0.383936	0.306447	0.577975	0.615799	0.344	0.394284	0.394284	0.628609	0.493622	0.541124	0.628609	0.788951	0.844502	0.985787	0.215857	0.415405	0.70739	0.844502	0.189647	0.872544	0.143971	0.603088	0.0858235	0.872544	0.541124	0.775195	0.138342	0.174357	0.149749	0.000530223	0.72081	0.517131	0.816628	0.872544	0.70739	0.858504	0.628609	0.985787	0.914856	0.553295	0.315608	0.363675	0.886619
AUC_lactic acid	0.0165367	0.020516	0.363675	0.7615	0.590479	0.830542	0.437084	0.254706	0.56558	0.517131	0.72081	0.306447	0.262943	0.138342	0.900724	0.437084	0.957376	0.127524	0.886619	0.957376	0.437084	0.641516	0.775195	0.641516	0.94303	0.0153485	0.493622	0.788951	0.353764	0.426176	0.943186	0.641516	0.161751	0.143971	0.149749	0.246625	0.830542	0.437084	0.654517	0.529068	0.344	0.0437926	0.577975	0.13286	0.122332	0.56558	0.72081	0.734304	0.694047
AUC_levoglucosan	0.155675	0.344	0.2387	0.13286	7.54456e-05	0.56558	0.215857	0.23093	0.590479	0.353764	0.254706	0.541124	0.70739	0.7615	0.155675	0.344	0.590479	0.577975	0.315608	0.590479	0.70739	0.929012	0.590479	0.985787	0.0200646	0.72081	0.174357	0.775195	0.505315	0.161751	0.943186	0.694047	0.872544	0.830542	0.353764	0.0235382	0.315608	0.914856	0.448127	0.493622	0.279882	0.747868	0.394284	0.788951	0.56558	0.872544	0.208554	0.271335	0.628609
AUC_N-methylalanine	0.603088	0.0286727	0.615799	0.858504	0.254706	0.971578	0.363675	0.415405	0.215857	0.70739	0.553295	0.149749	0.628609	0.143971	0.900724	0.680785	0.122332	0.747868	0.505315	0.315608	0.254706	0.517131	0.0517706	0.577975	0.357322	0.122332	0.929012	0.985787	0.404774	0.56558	0.872544	0.201406	0.72081	0.641516	0.505315	0.208554	0.654517	0.394284	0.985787	0.334386	0.985787	0.680785	0.0490045	0.694047	0.872544	0.788951	0.517131	0.56558	0.667608
AUC_oleamide	0.0165367	0.747868	0.886619	0.858504	0.394284	0.127524	0.288583	0.315608	0.553295	0.117283	0.262943	0.2387	0.900724	0.802763	0.886619	0.470615	0.553295	0.0607365	0.816628	0.590479	0.344	0.914856	0.0818642	0.470615	0.300521	0.0389926	0.70739	0.858504	0.155675	0.872544	0.816628	0.858504	0.914856	0.72081	0.775195	0.628609	0.577975	0.830542	0.802763	0.872544	0.844502	0.943186	0.56558	0.577975	0.971578	0.680785	0.603088	0.694047	0.415405
AUC_oxoproline	0.415405	0.070749	0.404774	0.297438	0.641516	0.7615	0.957376	0.694047	0.363675	0.143971	0.0743289	0.590479	0.000530223	0.577975	0.070749	0.0984901	0.0858235	0.122332	0.0345861	0.167978	0.628609	0.0546465	0.117283	0.0576344	0.558322	0.830542	0.985787	0.383936	0.900724	0.628609	0.654517	0.00668179	0.7615	0.971578	0.404774	0.943186	0.0325244	0.00266608	0.0121662	0.107609	0.0305541	0.0305541	0.254706	0.112376	0.70739	0.0345861	0.00502324	0.00410771	0.802763
AUC_palmitoleic acid	0.72081	0.0984901	0.107609	0.426176	1	0.858504	0.943186	0.448127	0.279882	0.603088	0.694047	0.844502	0.167978	0.0672917	0.505315	0.70739	0.223316	0.288583	0.180889	0.70739	0.553295	0.541124	0.788951	0.529068	0.521916	0.138342	0.470615	0.493622	0.641516	0.802763	0.971578	0.448127	0.0345861	0.102981	0.957376	0.886619	0.577975	0.0367413	0.149749	0.7615	0.112376	0.161751	0.112376	0.279882	0.517131	0.271335	0.0780333	0.223316	0.0858235
AUC_phenol	0.394284	0.208554	0.56558	0.680785	0.138342	0.334386	0.215857	0.56558	0.437084	0.201406	0.654517	0.223316	0.56558	0.254706	0.149749	0.900724	0.641516	0.858504	0.194413	0.70739	0.775195	0.747868	0.415405	0.363675	0.0186862	0.493622	0.107609	0.7615	0.858504	0.654517	0.0743289	0.641516	0.529068	0.541124	0.404774	0.747868	0.117283	0.7615	0.505315	0.448127	0.448127	0.615799	0.297438	0.404774	0.0607365	0.426176	0.324922	0.493622	0.734304
AUC_propane-1,2,3-tricarboxylate	0.426176	0.223316	0.7615	0.020516	0.72081	0.459305	0.0345861	0.394284	0.603088	0.306447	0.344	0.334386	0.297438	0.788951	0.00187136	0.943186	0.590479	0.0899131	0.0103404	0.914856	0.680785	0.929012	0.194413	0.0177925	0.760859	0.957376	0.459305	0.56558	0.394284	0.70739	0.271335	0.470615	0.816628	0.404774	0.23093	0.615799	0.000147448	0.0941347	0.000620989	0.00266608	0.00083916	0.0367413	0.517131	0.943186	0.628609	0.0103404	0.00332674	0.0899131	0.830542
AUC_salicylaldehyde	0.334386	0.2387	0.000530223	0.23093	0.23093	0.603088	0.0858235	0.0095095	0.470615	0.775195	0.271335	0.628609	0.143971	0.23093	0.262943	0.279882	0.344	0.194413	0.872544	0.149749	0.201406	0.985787	0.415405	0.482054	0.0752243	0.985787	0.0546465	0.0941347	0.0389926	0.180889	0.775195	0.262943	0.0517706	0.0899131	0.0546465	0.246625	0.872544	0.138342	0.844502	0.324922	0.985787	0.138342	0.167978	0.641516	0.914856	0.929012	0.553295	0.517131	0.0095095
AUC_stearic acid	0.775195	0.373733	0.0576344	0.315608	0.363675	0.315608	0.138342	0.155675	0.858504	0.437084	0.020516	0.872544	0.187574	0.577975	0.459305	0.667608	0.667608	0.628609	0.541124	0.0177925	0.149749	0.13286	0.70739	0.7615	0.463681	0.577975	0.694047	0.404774	0.0251671	0.143971	0.886619	0.020516	0.149749	0.155675	0.117283	0.215857	0.788951	0.2387	0.802763	0.448127	0.680785	0.297438	0.459305	0.470615	0.628609	0.641516	0.654517	0.315608	0.0153485
AUC_stigmasterol	1	0.667608	0.201406	0.0389926	0.426176	0.155675	0.201406	0.734304	0.112376	0.694047	0.985787	0.0858235	0.858504	0.493622	0.00873032	0.654517	0.297438	0.0367413	0.00553612	0.0546465	0.929012	0.505315	0.0780333	0.0389926	0.337783	0.482054	0.505315	0.802763	0.577975	0.174357	0.404774	0.459305	0.734304	0.844502	0.279882	0.415405	0.00370131	0.641516	0.0121662	0.0858235	0.00502324	0.590479	0.112376	0.775195	0.747868	0.0607365	0.0153485	0.223316	0.288583
AUC_threonic acid	0.72081	0.0142256	0.985787	0.201406	0.886619	0.886619	0.23093	0.13286	0.844502	0.929012	0.448127	0.734304	0.459305	0.288583	0.194413	0.641516	0.734304	0.529068	0.830542	0.914856	0.0413423	0.971578	0.553295	0.187574	0.935921	0.0463459	0.288583	0.628609	0.0899131	0.541124	0.886619	0.254706	0.13286	0.0517706	0.0060883	0.415405	0.529068	0.553295	0.383936	0.102981	0.167978	0.13286	0.334386	0.246625	0.517131	0.517131	0.271335	0.315608	0.615799
AUC_trans-4-hydroxyproline	0.747868	0.23093	0.0639549	0.306447	0.603088	0.603088	0.415405	0.306447	0.70739	0.553295	0.603088	0.802763	0.971578	0.747868	0.0490045	0.929012	0.138342	0.0153485	0.0463459	0.315608	0.694047	0.297438	0.788951	0.194413	0.886308	0.404774	0.383936	0.775195	0.363675	0.102981	0.482054	0.615799	0.70739	0.529068	0.149749	0.802763	0.194413	0.844502	0.161751	0.102981	0.306447	0.394284	0.0780333	0.72081	0.415405	0.112376	0.529068	0.680785	0.000620989
AUC_UDP-glucuronic acid	0.201406	0.23093	0.404774	0.459305	0.00502324	0.254706	0.437084	0.56558	0.590479	0.201406	0.459305	0.553295	0.628609	0.943186	0.373733	0.482054	0.929012	0.363675	0.459305	0.943186	0.56558	0.816628	0.886619	0.802763	0.0186862	0.654517	0.187574	0.844502	0.886619	0.529068	0.858504	0.929012	0.306447	0.23093	0.788951	0.208554	0.628609	0.943186	0.802763	0.985787	0.680785	0.985787	0.603088	0.914856	0.830542	0.929012	0.426176	0.415405	0.208554
AUC_uric acid	0.886619	0.23093	0.415405	0.56558	0.971578	0.459305	0.654517	0.482054	0.900724	0.324922	0.271335	0.957376	0.0672917	0.174357	0.426176	0.943186	0.654517	0.957376	0.344	0.0367413	0.383936	0.0389926	0.957376	0.72081	0.686583	0.943186	0.858504	0.246625	0.603088	0.628609	0.315608	0.00410771	0.0413423	0.0941347	0.886619	0.830542	0.628609	0.0103404	0.2387	0.844502	0.324922	0.288583	0.482054	0.138342	0.56558	0.541124	0.070749	0.0389926	0.0367413
AUC_uridine	0.844502	0.122332	0.394284	0.271335	0.844502	0.667608	0.788951	0.872544	0.517131	0.0780333	0.694047	0.324922	0.262943	0.0941347	0.788951	0.943186	0.161751	0.383936	0.667608	0.0463459	0.56558	0.517131	0.553295	0.56558	0.521916	0.415405	0.747868	0.802763	0.517131	0.437084	0.7615	0.0743289	0.0367413	0.0325244	0.816628	0.641516	0.844502	0.0165367	0.482054	0.830542	0.654517	0.802763	0.117283	0.426176	0.957376	0.858504	0.493622	0.541124	0.0219886
citric acid	0.680785	0.0219886	0.180889	0.174357	0.482054	0.517131	0.628609	0.628609	0.493622	0.505315	0.215857	0.155675	0.0780333	3.90954e-12	0.577975	0.929012	0.383936	0.149749	0.56558	0.505315	0.914856	0.886619	0.872544	0.886619	0.17958	0.167978	0.271335	0.363675	0.363675	0.373733	0.394284	0.324922	0.541124	0.680785	0.0899131	0.56558	0.788951	0.0060883	0.174357	0.254706	0.155675	0.194413	0.112376	0.149749	0.00187136	0.448127	0.315608	0.404774	0.353764
cysteine-glycine	0.0780333	0.262943	0.929012	0.437084	0.127524	0.70739	0.194413	0.122332	0.404774	0.208554	0.0345861	0.138342	0.694047	0.0743289	0.7615	0.505315	0.138342	0.00266608	0.353764	0.667608	0.0984901	0.426176	0.0780333	0.383936	0.515952	0.0235382	0.858504	0.541124	0.0463459	0.7615	0.957376	1	0.628609	0.900724	0.315608	0.201406	0.271335	0.844502	0.541124	0.957376	0.816628	0.872544	0.0743289	0.482054	0.324922	0.437084	0.493622	0.553295	0.167978
cystine	0.816628	0.577975	0.56558	0.680785	0.541124	0.493622	0.541124	0.603088	0.0984901	0.56558	0.0413423	0.0463459	0.373733	0.70739	0.0899131	0.7615	0.529068	0.102981	0.0639549	0.180889	0.529068	0.517131	0.0367413	0.0546465	0.964378	0.56558	0.900724	0.590479	0.297438	0.590479	0.161751	0.858504	0.788951	0.641516	1	0.482054	0.00145419	0.517131	0.0286727	0.0899131	0.0121662	0.0367413	0.426176	0.694047	0.394284	0.0219886	0.0389926	0.279882	0.641516
dithiothreitol	0.0546465	0.448127	0.70739	0.194413	0.334386	0.482054	0.315608	0.127524	0.0517706	0.0325244	0.0858235	0.0177925	0.830542	0.2387	0.985787	0.553295	0.426176	0.117283	0.694047	0.315608	0.288583	0.615799	0.180889	0.844502	0.475073	0.279882	0.858504	0.215857	0.143971	0.816628	0.288583	0.437084	0.394284	0.155675	0.641516	0.830542	0.363675	0.297438	0.747868	0.872544	0.816628	0.437084	0.459305	0.404774	0.816628	0.517131	0.56558	0.694047	0.174357
GABA	0.553295	0.493622	0.394284	0.886619	0.363675	0.577975	0.493622	0.943186	0.279882	0.180889	0.470615	0.505315	0.138342	0.254706	0.886619	0.00454773	0.0286727	0.448127	0.56558	0.426176	0.775195	0.886619	0.0858235	0.541124	0.706615	0.788951	0.459305	0.943186	0.914856	0.886619	0.155675	0.448127	0.517131	0.667608	0.7615	0.70739	0.541124	0.541124	0.654517	0.886619	0.844502	0.363675	0.0899131	0.529068	0.482054	0.590479	0.470615	0.363675	0.482054
gamma-tocopherol	0.27489	0.641053	0.851296	0.740732	0.844291	0.921824	0.921824	0.469989	0.368001	0.52849	0.0528019	0.493014	0.102442	0.978652	0.129583	0.921824	0.319548	0.222632	0.27489	0.63458	0.425519	0.00493412	0.865336	0.0603156	0.46305	0.844291	0.324224	0.63458	0.475697	0.314909	0.378136	0.0528019	0.258109	0.33848	0.774893	0.283513	0.324224	0.190311	0.378136	0.283513	0.292291	0.66061	0.328938	0.186914	0.781772	0.27489	0.301223	0.164208	0.858311
Glucose	0.864781	0.174993	0.312801	0.646169	0.893082	0.928619	0.808652	0.685754	0.787806	0.526744	0.247858	0.633157	0.538844	0.80169	0.893082	0.526744	0.473818	0.594711	0.773979	0.439992	0.665862	0.462409	0.135925	0.767088	0.507627	0.964279	0.992854	0.672471	0.95714	0.563394	0.753355	0.563394	0.0203239	0.013514	0.370988	0.27278	0.294625	0.836628	0.557213	0.386374	0.575839	0.0266818	0.893082	0.914386	0.9215	0.95714	0.303636	0.317441	0.822616
glutamic acid	0.985787	0.208554	0.187574	0.155675	0.00731857	0.577975	0.373733	0.353764	0.297438	0.929012	0.404774	0.493622	0.844502	0.747868	0.0235382	0.246625	0.694047	0.72081	0.0517706	0.288583	0.872544	0.70739	0.788951	0.306447	0.0456169	0.830542	0.0490045	0.641516	0.437084	0.0177925	0.641516	0.72081	0.271335	0.383936	0.23093	0.161751	0.279882	0.844502	0.262943	0.334386	0.138342	0.858504	0.517131	0.628609	0.482054	0.426176	0.0941347	0.138342	0.641516
glycine	0.971578	0.448127	0.830542	0.334386	0.102981	0.590479	0.517131	0.70739	0.971578	0.0576344	0.615799	0.694047	0.517131	0.957376	0.667608	0.404774	0.577975	0.505315	0.872544	0.271335	0.844502	0.844502	0.802763	0.775195	0.182897	0.517131	0.187574	0.603088	0.7615	0.654517	0.404774	0.802763	0.288583	0.161751	0.541124	0.470615	0.872544	0.858504	0.971578	0.971578	0.872544	0.858504	0.788951	0.577975	0.246625	0.482054	0.56558	0.541124	0.112376
Insulin	0.576376	0.457395	0.0439804	0.601566	0.672902	0.774285	0.601566	0.376768	0.515359	0.521329	0.595229	0.978593	0.182237	0.0947242	0.808913	0.836851	0.601566	0.446194	0.480196	0.463046	0.260845	0.857923	0.480196	0.503513	0.39352	0.829849	0.221259	0.582633	0.150821	0.273485	0.614318	1	0.0610526	0.162929	0.71295	0.159845	0.521329	0.232723	0.418788	0.607929	0.269233	0.248557	0.440644	0.582633	0.418788	0.260845	0.521329	0.692834	0.620732
kynurenine	0.394284	0.138342	0.246625	0.802763	0.107609	0.149749	0.667608	0.553295	0.590479	0.900724	0.517131	0.373733	0.0305541	0.517131	0.914856	0.174357	0.590479	0.816628	0.404774	0.734304	0.394284	0.541124	0.529068	0.482054	0.163569	0.694047	0.0268778	0.529068	0.363675	0.654517	0.394284	0.529068	0.353764	0.529068	0.830542	0.0984901	0.470615	0.0743289	0.262943	0.615799	0.271335	0.415405	0.694047	0.353764	0.529068	0.112376	0.747868	0.971578	0.914856
lactic acid	0.0389926	0.254706	0.943186	0.448127	0.143971	0.734304	0.112376	0.208554	0.747868	0.577975	0.161751	0.482054	0.872544	0.0546465	0.844502	0.505315	0.306447	0.0490045	0.680785	0.872544	0.590479	0.541124	0.2387	0.334386	0.781478	0.143971	0.858504	0.694047	0.194413	0.667608	0.603088	0.844502	0.315608	0.315608	0.194413	0.271335	0.929012	0.694047	0.844502	0.459305	0.603088	0.415405	0.2387	0.680785	0.117283	0.929012	0.788951	0.641516	0.383936
lysine	0.23093	0.00502324	0.262943	0.577975	0.324922	0.72081	0.985787	0.900724	0.187574	0.0858235	0.383936	0.315608	0.0672917	0.223316	0.844502	0.415405	0.734304	0.775195	0.816628	0.00800072	0.971578	0.254706	0.900724	0.943186	0.169859	0.505315	0.324922	0.315608	0.957376	0.112376	0.971578	0.00731857	1	0.985787	0.957376	0.734304	0.900724	0.0191181	0.482054	0.7615	0.70739	0.180889	0.448127	0.306447	0.775195	0.816628	0.577975	0.505315	0.0743289
malic acid	0.844291	0.00493412	0.0513834	0.436434	0.957318	0.540557	0.950211	0.844291	0.87237	0.964427	0.67376	0.296738	0.0756948	5.58454e-05	0.816379	0.879413	0.283513	0.167337	0.907661	0.795574	0.510614	0.795574	0.907661	0.628132	0.219387	0.0499924	0.358012	0.893522	0.596258	0.301223	0.680367	0.319548	0.522501	0.707003	0.109422	0.781772	0.950211	0.0542481	0.420114	0.475697	0.204287	0.116715	0.0386612	0.0619046	0.0210117	0.686995	0.324224	0.353073	0.368001
N-methylalanine	0.844502	0.0639549	0.900724	0.541124	0.0743289	0.306447	0.872544	0.517131	0.788951	0.383936	0.254706	0.914856	0.167978	0.246625	0.363675	0.628609	0.315608	0.262943	0.404774	0.858504	0.900724	0.174357	0.437084	0.246625	0.148509	0.654517	0.56558	0.459305	0.929012	0.775195	0.517131	0.127524	0.201406	0.553295	0.590479	0.0672917	0.577975	0.0517706	0.161751	0.334386	0.174357	0.734304	0.306447	0.404774	0.541124	0.167978	0.470615	0.747868	0.694047
oxoproline	0.404774	0.107609	0.315608	0.553295	0.529068	0.900724	1	0.641516	0.271335	0.143971	0.020516	0.56558	0.00211223	0.7615	0.122332	0.0984901	0.0780333	0.138342	0.0984901	0.187574	0.541124	0.0607365	0.117283	0.0517706	0.660167	0.957376	0.929012	0.529068	0.603088	0.667608	0.353764	0.0121662	0.886619	0.900724	0.615799	0.747868	0.0437926	0.0177925	0.0490045	0.117283	0.0818642	0.0305541	0.23093	0.194413	0.957376	0.0607365	0.0268778	0.0153485	0.734304
phosphoric acid	0.161751	0.0899131	0.667608	0.0984901	0.373733	0.201406	0.615799	0.363675	0.334386	0.363675	0.0818642	0.0546465	0.0858235	0.00800072	0.505315	0.985787	0.830542	0.215857	0.415405	0.900724	0.654517	0.694047	0.816628	0.628609	0.77459	0.122332	0.373733	0.816628	0.223316	0.127524	0.971578	0.404774	0.271335	0.262943	0.107609	0.493622	0.957376	0.0165367	0.271335	0.470615	0.167978	0.667608	0.56558	0.0413423	0.020516	0.529068	0.404774	0.482054	0.470615
pyruvic acid	0.830542	0.194413	0.641516	0.628609	0.900724	0.667608	0.957376	0.56558	0.334386	0.180889	0.493622	0.194413	0.957376	0.505315	0.529068	0.943186	0.246625	0.288583	0.353764	0.0345861	0.0112252	0.985787	0.167978	0.872544	0.872195	0.0517706	0.541124	0.448127	0.0672917	0.363675	0.830542	0.187574	0.929012	0.7615	0.680785	0.394284	0.107609	0.734304	0.394284	0.482054	0.373733	0.844502	0.0743289	0.363675	0.900724	0.215857	0.830542	0.802763	0.254706
salicylaldehyde	0.363675	0.155675	1.92962e-05	0.070749	0.167978	0.553295	0.0490045	0.0251671	0.628609	0.985787	0.603088	0.971578	0.297438	0.279882	0.0325244	0.13286	0.315608	0.0325244	0.306447	0.262943	0.667608	0.383936	0.654517	0.155675	0.048253	0.404774	0.0153485	0.215857	0.138342	0.194413	0.7615	0.603088	0.437084	0.437084	0.0984901	0.505315	0.324922	0.529068	0.529068	0.107609	0.493622	0.161751	0.0818642	0.590479	0.734304	0.615799	0.844502	1	0.0413423
serine	0.775195	0.0367413	0.194413	0.404774	0.437084	0.577975	0.482054	0.628609	0.747868	0.667608	0.23093	0.505315	0.00145419	0.070749	0.306447	0.680785	1	0.590479	0.194413	0.187574	0.654517	0.0490045	0.615799	0.13286	0.25741	0.603088	0.680785	0.590479	0.680785	0.667608	0.72081	0.00332674	0.0345861	0.107609	0.529068	0.493622	0.482054	0.000530223	0.0984901	0.470615	0.102981	0.23093	0.590479	0.0268778	0.288583	0.254706	0.0367413	0.0251671	0.373733
threonic acid	0.56558	0.0251671	0.957376	0.0899131	0.858504	0.271335	0.167978	0.271335	0.72081	0.72081	1	0.437084	0.13286	0.0305541	0.0546465	0.7615	0.858504	0.415405	0.167978	0.654517	0.553295	0.577975	0.734304	0.13286	0.337783	0.201406	0.872544	0.577975	0.180889	0.201406	0.603088	0.404774	0.694047	0.315608	0.00502324	0.985787	0.174357	0.0517706	0.0268778	0.0103404	0.0142256	0.23093	0.577975	0.288583	0.0517706	0.0413423	0.201406	0.448127	0.383936
trans-4-hydroxyproline	0.493622	0.127524	0.0607365	0.56558	0.957376	0.56558	0.914856	0.929012	0.7615	0.271335	0.886619	0.72081	0.971578	0.344	0.102981	0.747868	0.223316	0.00502324	0.0576344	0.271335	0.415405	0.155675	0.775195	0.174357	0.754018	0.194413	0.415405	0.971578	0.971578	0.23093	0.553295	0.788951	0.459305	0.680785	0.603088	0.615799	0.306447	0.914856	0.271335	0.404774	0.404774	0.201406	0.0780333	0.830542	0.872544	0.194413	0.517131	0.654517	0.0235382
tryptophan	0.541124	0.426176	0.117283	0.201406	1	0.174357	0.279882	0.788951	0.174357	0.155675	0.493622	0.107609	0.957376	0.353764	0.0095095	0.470615	0.288583	0.000450287	0.0165367	0.0142256	0.734304	0.929012	0.208554	0.0153485	0.602075	0.23093	0.415405	0.858504	0.957376	0.149749	0.590479	0.363675	0.929012	0.56558	0.297438	0.775195	0.00668179	1	0.0345861	0.0413423	0.0235382	0.971578	0.0941347	0.470615	0.70739	0.0367413	0.122332	0.529068	0.0219886
uric acid	0.0941347	0.383936	0.667608	0.459305	0.404774	0.394284	0.957376	0.830542	0.394284	0.00668179	0.872544	0.459305	0.102981	0.529068	0.577975	0.334386	0.641516	0.529068	0.394284	0.0131656	0.694047	0.0858235	0.830542	0.929012	0.679947	0.667608	0.830542	0.482054	0.830542	0.72081	0.858504	0.0153485	0.279882	0.208554	0.844502	0.404774	0.747868	0.0325244	0.415405	0.943186	0.577975	0.363675	0.802763	0.122332	0.775195	0.734304	0.161751	0.0672917	0.0607365
uridine	0.577975	0.149749	0.306447	0.437084	0.493622	0.288583	0.72081	0.816628	0.102981	0.0941347	0.373733	0.0367413	0.0639549	0.138342	0.641516	0.117283	0.971578	0.775195	0.194413	0.246625	0.802763	0.577975	0.957376	0.415405	0.123746	0.353764	0.149749	0.363675	0.383936	0.929012	0.541124	0.334386	0.306447	0.297438	0.929012	0.517131	0.654517	0.0060883	0.161751	0.373733	0.426176	0.70739	0.802763	0.56558	0.459305	0.13286	0.654517	0.816628	0.943186
QUICKI	0.448127	0.70739	0.0984901	0.517131	0.615799	0.72081	0.517131	0.215857	0.262943	0.297438	0.680785	0.70739	0.353764	0.201406	0.929012	0.943186	0.448127	0.459305	0.529068	0.279882	0.254706	0.734304	0.590479	0.603088	0.498244	0.957376	0.223316	0.694047	0.117283	0.334386	0.667608	0.7615	0.020516	0.0780333	0.505315	0.112376	0.667608	0.394284	0.553295	0.872544	0.353764	0.482054	0.415405	0.70739	0.56558	0.353764	0.654517	0.900724	0.529068
Matsuda	0.493622	0.70739	0.107609	0.363675	0.426176	0.816628	0.470615	0.122332	0.201406	0.383936	0.394284	0.470615	0.654517	0.448127	0.680785	0.667608	0.194413	0.344	0.929012	0.470615	0.344	0.628609	0.802763	0.788951	0.686583	0.914856	0.306447	0.971578	0.0517706	0.929012	0.404774	0.872544	0.0153485	0.0463459	0.174357	0.0463459	0.985787	0.667608	0.985787	0.734304	0.72081	0.603088	0.2387	0.929012	0.747868	0.816628	0.971578	0.816628	0.13286
HgA1c	0.560691	0.591131	0.904702	0.459577	0.776809	0.292388	0.203706	0.386745	0.768428	0.292388	0.913335	0.793637	0.939283	0.718644	0.151346	0.913335	0.32034	0.939283	0.265868	0.466499	0.0155373	0.819028	0.271057	0.102725	0.41081	0.0378582	0.0288072	0.669844	0.054066	0.735137	0.516277	0.538291	0.501823	0.583462	0.785212	0.793637	0.735137	0.645864	0.59884	0.412511	0.62219	0.661818	0.221784	0.85313	0.343717	0.343717	0.419083	0.405991	0.939283
FSHmIU.mL	0.392934	0.802229	0.19308	0.414078	0.463681	0.521916	0.237317	0.00509137	0.19308	0.539988	0.935921	0.123746	0.795298	0.94303	0.237317	0.424861	0.992874	0.740385	0.992874	0.837074	0.028119	0.287181	0.068108	0.166695	0.0828474	0.101903	0.0035582	0.0350228	0.0350228	0.182897	0.608432	0.424861	0.570687	0.740385	0.0868462	0.583162	0.602075	0.69324	0.640588	0.408739	0.971499	0.515952	0.830081	0.305045	0.830081	0.851093	0.879248	0.720067	0.332993
LHmIU.mL	0.288583	0.603088	0.0286727	0.155675	0.775195	0.529068	0.161751	0.0325244	0.517131	0.654517	0.914856	0.404774	0.844502	0.900724	0.155675	0.187574	0.929012	0.223316	0.816628	0.459305	0.0984901	0.344	0.127524	0.180889	0.261546	0.288583	0.0780333	0.0984901	0.0517706	0.223316	1	0.641516	0.404774	0.353764	0.0142256	0.694047	0.985787	0.858504	0.830542	0.246625	0.493622	0.459305	0.872544	0.363675	0.747868	0.816628	0.971578	0.957376	0.208554
cholmg.dL	0.169753	0.442438	0.249283	0.931114	0.854155	0.422481	0.563504	0.888252	0.753434	0.803451	0.913943	0.931114	0.696174	0.102705	0.96553	0.578567	0.039598	0.38394	0.753434	0.307014	0.27992	0.415929	0.38394	0.888252	0.434071	0.353265	0.563504	0.548603	0.526563	0.476676	0.648215	0.795063	1	0.879709	0.982762	0.795063	0.820285	0.795063	0.982762	0.672054	0.837188	0.519302	0.00853932	0.556033	0.96553	0.922525	0.99138	1	0.519302
HDLmg.dL	0.0800194	0.391097	0.124455	0.829024	0.617524	0.795415	0.484452	0.948402	1	0.845931	0.664633	0.556737	0.931234	0.330589	0.429919	0.812183	0.378569	0.34226	0.512841	0.556737	0.0512656	0.255138	0.648796	0.896986	0.428245	0.100603	0.914093	0.541936	0.416775	0.96559	0.745609	0.879919	0.812183	0.914093	0.586824	0.571701	0.275567	0.812183	0.443262	0.541936	0.556737	0.712884	0.0708943	0.541936	0.680598	0.498556	0.982792	0.745609	0.931234
LDLmg.dL	0.118176	0.255138	0.330589	0.527302	0.235621	0.778725	0.541936	0.696683	0.948402	0.879919	0.470532	0.879919	0.470532	0.174519	0.354148	0.982792	0.366251	0.319139	0.403833	0.34226	0.680598	0.914093	0.982792	0.151735	0.0741504	0.829024	0.948402	0.199335	0.762122	0.470532	0.812183	0.391097	0.795415	0.812183	0.795415	0.286123	0.30791	0.151735	0.199335	0.124455	0.456801	0.391097	0.21702	0.556737	0.96559	0.174519	0.456801	0.602099	0.778725
triglymg.dL	0.931234	0.879919	0.862898	0.879919	0.296904	0.208063	0.30791	0.762122	0.456801	0.982792	0.330589	0.762122	0.0753623	0.21702	0.571701	0.0951573	0.00258622	0.0113742	0.21702	0.948402	0.265239	0.137658	0.0585895	0.275567	0.48992	0.265239	0.354148	0.795415	0.429919	0.696683	0.712884	0.484452	0.879919	0.948402	0.914093	0.745609	0.30791	0.354148	0.330589	0.762122	0.527302	0.982792	0.00258622	0.512841	0.931234	0.378569	0.391097	0.354148	0.118176
heightcm.	0.482054	0.00668179	0.122332	0.802763	0.929012	0.517131	0.985787	0.641516	0.788951	0.603088	0.23093	0.900724	0.13286	0.149749	0.914856	0.541124	0.844502	0.603088	0.680785	0.279882	0.694047	0.957376	0.603088	0.844502	0.52791	0.180889	0.886619	0.517131	0.900724	0.943186	0.553295	0.112376	0.0984901	0.0576344	0.155675	0.208554	0.628609	0.353764	0.590479	0.553295	0.383936	0.00187136	0.470615	0.138342	0.246625	0.900724	0.215857	0.127524	0.505315
weightkg.	0.0517706	0.174357	0.482054	0.747868	0.306447	0.334386	0.404774	0.143971	0.914856	0.373733	0.459305	0.985787	0.288583	0.872544	0.262943	0.306447	0.297438	0.615799	0.470615	0.72081	0.353764	0.641516	0.470615	0.517131	0.19308	0.0517706	0.437084	0.694047	0.517131	0.13286	0.306447	0.628609	0.194413	0.149749	0.208554	0.0941347	0.23093	0.816628	0.448127	0.344	0.13286	0.00553612	0.641516	0.143971	0.816628	0.324922	0.127524	0.112376	0.858504
BMI	0.0576344	0.900724	0.872544	1	0.324922	0.448127	0.56558	0.215857	0.900724	0.315608	0.603088	0.985787	0.802763	0.223316	0.373733	0.541124	0.297438	0.734304	0.493622	0.470615	0.415405	0.858504	0.694047	0.324922	0.00534634	0.271335	0.180889	0.0984901	0.802763	0.13286	0.0191181	0.985787	0.900724	0.775195	0.985787	0.470615	0.553295	0.641516	0.971578	0.886619	0.517131	0.459305	0.279882	0.334386	0.23093	0.667608	0.470615	0.383936	0.971578
DXA..Body Fat	0.00237662	0.943186	0.334386	0.2387	0.0286727	0.775195	0.208554	0.00266608	0.107609	0.0858235	0.470615	0.2387	0.886619	0.802763	0.641516	0.72081	0.215857	0.529068	0.615799	0.844502	0.383936	0.943186	0.844502	0.734304	0.0161426	0.603088	0.23093	0.0305541	0.288583	0.180889	0.0743289	1	0.138342	0.383936	0.155675	0.0607365	0.900724	0.654517	0.667608	0.553295	0.900724	0.844502	0.23093	0.459305	0.929012	0.448127	0.971578	0.775195	0.858504
VO2peak(ml.FFM.min)	0.844502	0.603088	0.680785	0.872544	0.127524	0.00731857	0.72081	0.394284	0.641516	0.459305	0.7615	0.844502	0.943186	0.324922	0.505315	0.872544	0.383936	0.138342	0.788951	0.404774	0.161751	0.886619	0.2387	0.900724	0.214496	0.0235382	0.0607365	0.844502	0.167978	0.437084	0.363675	0.383936	0.788951	0.775195	0.448127	0.102981	0.603088	0.914856	0.858504	0.914856	0.816628	0.404774	0.143971	0.161751	0.56558	0.900724	0.373733	0.167978	0.363675
[truncated: 67 more columns]
