# Supplementary material for: Improved Metabolic Health Alters Host Metabolism in Parallel with Changes in Systemic Xeno-Metabolites of Gut Origin
Source: PLoS One. 2014 Jan 8;9(1):e84260. doi: 10.1371/journal.pone.0084260 (PMC3885560; doi:10.1371/journal.pone.0084260)
Supplement: Table S4 — Post-intervention Spearman's correlation coefficient comparisons across analytes and phenotype variables. (XLS) [file pone.0084260.s005.xls]

## Sheet: Supplemental Table 4
SUPPLEMENTAL TABLE 4 ("Post")
Spearmans correlations, overnight-fasted plasma metabolite concentrations & post-OGTT area-under-the-curve (AUC) values													r value > 0.5			p value <0.05; see pvalue matrix, bottom of worksheet
Post- weight loss and fitness intervention, previously-obese, hyperinsulinemic sedentary women													r value < 0.5
	199203	199777	199802	211972	213961	214535	217893	223505	223513	225427	225548	226851	228147	232087	235972	268365	281268	288808	299159	309642	402237	415114	1,5-anhydroglucitol	2,3,5-trihydroxypyrazine	2,5-furandicarboxylic acid	2-ketoisocaproic acid	5-hydroxymethyl-2-furoic acid	adenosine-5-phosphate	alphaketoglutaric acid	arginine..ornithine	aspartic acid	AUC_199773	AUC_199777	AUC_199794	AUC_211972	AUC_213961	AUC_226842	AUC_226848	AUC_232946	AUC_235972	AUC_241882	AUC_271416	AUC_281268	AUC_285340	AUC_295002	AUC_299159	AUC_299211	AUC_369638	AUC_4-hydroxybenzoate
199203	1	0.13986	0.104895	-0.188811	0.608392	0.258741	0.671329	-0.594406	-0.0979021	0.0699301	0.41958	-0.20979	-0.027972	0.475524	0.125874	-0.433566	0.00699301	-0.314685	-0.20979	0.685315	-0.216783	0.384615	0.51049	-0.384615	-0.182137	-0.307692	0.321678	0.160839	0.00699301	-0.027972	0.237762	0.041958	0.20979	-0.0699301	0.300699	-0.461538	0.391608	0.293706	0.72028	0.034965	0.573427	0.307692	-0.020979	-0.335664	0.223776	0.34965	0.328671	-0.167832	0.125874
199777	0.13986	1	0.867133	-0.237762	0.020979	-0.174825	0.174825	0.0909091	0.475524	-0.195804	-0.174825	0.370629	0.265734	0.685315	-0.216783	-0.839161	0.356643	-0.111888	-0.0979021	0.132867	0.363636	-0.013986	0.356643	-0.013986	0.189142	0.181818	-0.20979	0.699301	0.174825	-0.041958	0.34965	-0.594406	0.160839	0.0629371	0.594406	-0.0629371	0.237762	-0.727273	-0.20979	0.0769231	0.020979	-0.230769	0.216783	-0.384615	-0.181818	-0.167832	0.146853	-0.818182	0
199802	0.104895	0.867133	1	-0.251748	-0.104895	-0.174825	0.111888	0.125874	0.475524	-0.034965	-0.363636	0.342657	0.454545	0.671329	-0.272727	-0.762238	0.475524	-0.356643	-0.0909091	0.174825	0.412587	0.00699301	0.146853	0.111888	0.290718	0.321678	-0.160839	0.706294	0.251748	-0.0769231	0.125874	-0.657343	0.328671	0.188811	0.482517	-0.048951	0.321678	-0.748252	-0.20979	0.293706	0.174825	-0.0979021	0.020979	-0.552448	-0.181818	-0.216783	-0.118881	-0.797203	0.230769
211972	-0.188811	-0.237762	-0.251748	1	-0.727273	-0.503497	-0.0839161	0.0629371	-0.636364	-0.391608	0.013986	-0.608392	-0.20979	-0.265734	0.811189	0.475524	0.594406	0.293706	0.958042	-0.433566	-0.265734	-0.405594	-0.167832	0.601399	0.654992	-0.146853	0.0979021	0	-0.363636	0.370629	-0.13986	0.433566	-0.496504	-0.398601	-0.783217	0.839161	-0.755245	0.104895	-0.559441	-0.41958	-0.657343	0.034965	-0.545455	0.41958	0.188811	0.00699301	0.321678	0.398601	-0.0769231
213961	0.608392	0.020979	-0.104895	-0.727273	1	0.426573	0.307692	-0.482517	0.244755	0.258741	0.426573	0.314685	0.0769231	0.223776	-0.468531	-0.328671	-0.636364	-0.167832	-0.762238	0.587413	0.048951	0.398601	0.426573	-0.559441	-0.795098	-0.0559441	-0.027972	-0.132867	0.377622	-0.475524	0.34965	0	0.237762	0.0839161	0.573427	-0.909091	0.559441	0.34965	0.825175	0.160839	0.615385	0.188811	0.461538	-0.188811	-0.118881	0.202797	0.020979	-0.111888	-0.041958
214535	0.258741	-0.174825	-0.174825	-0.503497	0.426573	1	0.258741	0.244755	0.293706	0.552448	0.370629	0.265734	-0.0909091	-0.20979	-0.398601	0.048951	-0.538462	-0.251748	-0.503497	0.699301	0.027972	0.643357	-0.286713	-0.538462	-0.311734	-0.034965	0.524476	-0.342657	-0.160839	-0.118881	0.125874	0.258741	0.692308	0.685315	0.272727	-0.412587	0.321678	0.0909091	0.559441	0.503497	0.440559	-0.272727	0.545455	-0.00699301	0.230769	0.0559441	-0.216783	0.174825	-0.265734
217893	0.671329	0.174825	0.111888	-0.0839161	0.307692	0.258741	1	-0.636364	-0.0559441	-0.258741	0.258741	-0.188811	-0.48951	0.125874	0.0769231	-0.223776	0.314685	-0.272727	-0.027972	0.48951	-0.181818	0.00699301	0.461538	-0.314685	0.19965	-0.20979	0.706294	0.237762	-0.188811	0.146853	0.636364	0.013986	0.447552	0.307692	0.300699	-0.328671	-0.041958	0.216783	0.440559	-0.328671	0.398601	-0.412587	-0.244755	-0.0769231	0.398601	-0.160839	0.223776	-0.0769231	-0.013986
223505	-0.594406	0.0909091	0.125874	0.0629371	-0.482517	0.244755	-0.636364	1	0.244755	0.272727	-0.272727	0.293706	0.321678	-0.153846	-0.0769231	0.111888	-0.13986	0.0839161	0.0699301	-0.0839161	0.216783	0.146853	-0.72028	0.0979021	0.161121	0.244755	-0.237762	-0.0769231	-0.20979	0.181818	-0.454545	-0.00699301	0.118881	0.265734	-0.13986	0.454545	0.00699301	-0.48951	-0.41958	0.426573	-0.265734	-0.0979021	0.482517	0.0839161	-0.041958	0.0979021	-0.125874	0.013986	-0.265734
223513	-0.0979021	0.475524	0.475524	-0.636364	0.244755	0.293706	-0.0559441	0.244755	1	0.384615	0.111888	0.902098	0.440559	0.496504	-0.48951	-0.622378	-0.307692	0.244755	-0.545455	0.104895	0.034965	0.482517	0.00699301	-0.0769231	-0.164624	-0.048951	-0.020979	0.48951	-0.013986	-0.251748	0.041958	-0.622378	0.328671	0.251748	0.34965	-0.384615	0.328671	-0.594406	0.013986	0.363636	0.153846	-0.223776	0.440559	-0.622378	0.013986	-0.272727	-0.20979	-0.615385	-0.020979
225427	0.0699301	-0.195804	-0.034965	-0.391608	0.258741	0.552448	-0.258741	0.272727	0.384615	1	0.447552	0.244755	0.265734	0.118881	-0.300699	-0.034965	-0.433566	-0.041958	-0.34965	0.237762	0.244755	0.748252	-0.104895	0.104895	-0.346761	0.146853	0.0909091	-0.104895	0.0979021	-0.41958	-0.293706	0.111888	0.230769	0.251748	0.020979	-0.153846	0.244755	-0.272727	0.13986	0.748252	0.0979021	0.258741	0.258741	-0.181818	0.13986	-0.174825	-0.496504	-0.041958	0.188811
225548	0.41958	-0.174825	-0.363636	0.013986	0.426573	0.370629	0.258741	-0.272727	0.111888	0.447552	1	0.0769231	-0.167832	0.0699301	0.0769231	0	-0.328671	0.433566	-0.027972	0.272727	-0.20979	0.615385	0.342657	0.111888	-0.301226	-0.34965	0.391608	-0.027972	-0.034965	-0.447552	0.335664	0.398601	-0.020979	-0.034965	-0.188811	-0.188811	-0.237762	0.111888	0.251748	0.104895	-0.160839	-0.00699301	0.146853	0.118881	0.181818	-0.167832	-0.00699301	0.0769231	-0.041958
226851	-0.20979	0.370629	0.342657	-0.608392	0.314685	0.265734	-0.188811	0.293706	0.902098	0.244755	0.0769231	1	0.517483	0.293706	-0.559441	-0.447552	-0.461538	0.272727	-0.573427	0.160839	0.0699301	0.335664	-0.160839	-0.0909091	-0.33275	0.0699301	-0.195804	0.335664	0.153846	-0.384615	0.111888	-0.475524	0.328671	0.27972	0.286713	-0.468531	0.272727	-0.405594	0.0769231	0.293706	0.160839	-0.223776	0.629371	-0.41958	-0.181818	-0.160839	-0.188811	-0.447552	-0.160839
228147	-0.027972	0.265734	0.454545	-0.20979	0.0769231	-0.0909091	-0.48951	0.321678	0.440559	0.265734	-0.167832	0.517483	1	0.433566	-0.13986	-0.377622	-0.146853	-0.0769231	-0.160839	0.0839161	0.104895	0.244755	-0.356643	0.188811	-0.0805605	0.13986	-0.454545	0.202797	0.181818	-0.265734	-0.384615	-0.258741	-0.0769231	-0.223776	-0.027972	-0.125874	0.405594	-0.314685	-0.013986	0.559441	0.0839161	0.454545	0.251748	-0.594406	-0.27972	0.223776	-0.034965	-0.272727	-0.0909091
232087	0.475524	0.685315	0.671329	-0.265734	0.223776	-0.20979	0.125874	-0.153846	0.496504	0.118881	0.0699301	0.293706	0.433566	1	0.034965	-0.923077	0.160839	0.0699301	-0.216783	0.146853	-0.0629371	0.335664	0.517483	0.00699301	-0.0105079	-0.188811	-0.244755	0.783217	0.048951	0	-0.104895	-0.685315	-0.048951	-0.307692	0.34965	-0.181818	0.440559	-0.496504	0.0839161	0.118881	0.244755	0.377622	0.0629371	-0.755245	0.0629371	0.146853	0.244755	-0.825175	0.335664
235972	0.125874	-0.216783	-0.272727	0.811189	-0.468531	-0.398601	0.0769231	-0.0769231	-0.48951	-0.300699	0.0769231	-0.559441	-0.13986	0.034965	1	0.237762	0.475524	0.307692	0.776224	-0.321678	-0.468531	-0.27972	-0.00699301	0.398601	0.595447	-0.314685	0.0909091	0.160839	-0.664336	0.636364	-0.300699	0.314685	-0.559441	-0.573427	-0.65035	0.671329	-0.524476	0.195804	-0.272727	-0.517483	-0.384615	0.265734	-0.482517	0.125874	0.594406	0.258741	0.699301	0.363636	-0.195804
268365	-0.433566	-0.839161	-0.762238	0.475524	-0.328671	0.048951	-0.223776	0.111888	-0.622378	-0.034965	0	-0.447552	-0.377622	-0.923077	0.237762	1	-0.0769231	0.041958	0.398601	-0.265734	-0.0559441	-0.328671	-0.496504	0.216783	0.0805605	0.132867	0.174825	-0.713287	-0.132867	0.0699301	-0.125874	0.748252	-0.153846	0.0839161	-0.608392	0.356643	-0.552448	0.545455	-0.153846	-0.174825	-0.328671	-0.104895	-0.237762	0.734266	0.0839161	-0.0699301	-0.160839	0.902098	-0.20979
281268	0.00699301	0.356643	0.475524	0.594406	-0.636364	-0.538462	0.314685	-0.13986	-0.307692	-0.433566	-0.328671	-0.461538	-0.146853	0.160839	0.475524	-0.0769231	1	-0.216783	0.727273	-0.251748	0.13986	-0.517483	0.146853	0.51049	0.847637	0.188811	0.174825	0.482517	-0.160839	0.356643	0.13986	-0.0909091	-0.0839161	-0.0839161	-0.167832	0.587413	-0.447552	-0.328671	-0.545455	-0.314685	-0.300699	-0.195804	-0.699301	0.020979	0.20979	-0.335664	0.153846	-0.153846	0.153846
288808	-0.314685	-0.111888	-0.356643	0.293706	-0.167832	-0.251748	-0.272727	0.0839161	0.244755	-0.041958	0.433566	0.272727	-0.0769231	0.0699301	0.307692	0.041958	-0.216783	1	0.188811	-0.51049	-0.517483	0.132867	0.111888	0.321678	-0.0315237	-0.517483	-0.104895	0.20979	-0.300699	0.00699301	-0.0979021	-0.0839161	-0.503497	-0.433566	-0.496504	0.251748	-0.454545	-0.0769231	-0.342657	-0.363636	-0.559441	-0.027972	0.0699301	0.048951	0.0979021	-0.0699301	0.20979	-0.048951	-0.048951
299159	-0.20979	-0.0979021	-0.0909091	0.958042	-0.762238	-0.503497	-0.027972	0.0699301	-0.545455	-0.34965	-0.027972	-0.573427	-0.160839	-0.216783	0.776224	0.398601	0.727273	0.188811	1	-0.461538	-0.0979021	-0.447552	-0.146853	0.692308	0.788092	-0.00699301	0.146853	0.0839161	-0.377622	0.34965	-0.048951	0.412587	-0.461538	-0.342657	-0.692308	0.867133	-0.783217	-0.0629371	-0.664336	-0.34965	-0.713287	-0.0769231	-0.615385	0.370629	0.244755	-0.181818	0.286713	0.342657	-0.153846
309642	0.685315	0.132867	0.174825	-0.433566	0.587413	0.699301	0.48951	-0.0839161	0.104895	0.237762	0.272727	0.160839	0.0839161	0.146853	-0.321678	-0.265734	-0.251748	-0.51049	-0.461538	1	0.0839161	0.468531	-0.013986	-0.538462	-0.33275	0.0629371	0.321678	-0.027972	0.174825	-0.202797	0.293706	0.111888	0.748252	0.559441	0.433566	-0.573427	0.475524	0.167832	0.762238	0.363636	0.727273	-0.013986	0.482517	-0.13986	0.034965	0.293706	-0.013986	-0.0909091	-0.041958
402237	-0.216783	0.363636	0.412587	-0.265734	0.048951	0.027972	-0.181818	0.216783	0.034965	0.244755	-0.20979	0.0699301	0.104895	-0.0629371	-0.468531	-0.0559441	0.13986	-0.517483	-0.0979021	0.0839161	1	-0.20979	0.034965	0.202797	-0.0980737	0.909091	-0.321678	-0.00699301	0.573427	-0.41958	0.286713	0.0839161	0.223776	0.384615	0.496504	-0.020979	0.048951	-0.454545	-0.251748	0.363636	-0.0629371	-0.167832	0.188811	0.307692	-0.286713	-0.447552	-0.398601	-0.13986	-0.027972
415114	0.384615	-0.013986	0.00699301	-0.405594	0.398601	0.643357	0.00699301	0.146853	0.482517	0.748252	0.615385	0.335664	0.244755	0.335664	-0.27972	-0.328671	-0.517483	0.132867	-0.447552	0.468531	-0.20979	1	0.020979	-0.244755	-0.381787	-0.405594	0.300699	-0.013986	-0.027972	-0.335664	-0.153846	-0.0699301	0.300699	0.167832	0.0699301	-0.328671	0.426573	-0.167832	0.398601	0.671329	0.237762	0.195804	0.384615	-0.440559	0.020979	0.118881	-0.27972	-0.272727	0.188811
1,5-anhydroglucitol	0.51049	0.356643	0.146853	-0.167832	0.426573	-0.286713	0.461538	-0.72028	0.00699301	-0.104895	0.342657	-0.160839	-0.356643	0.517483	-0.00699301	-0.496504	0.146853	0.111888	-0.146853	-0.013986	0.034965	0.020979	1	-0.0559441	-0.220666	-0.167832	-0.027972	0.398601	0.265734	-0.181818	0.433566	-0.27972	-0.195804	-0.293706	0.41958	-0.293706	0.0699301	-0.041958	0.153846	-0.342657	0.0839161	0.0909091	-0.20979	-0.104895	0.00699301	-0.174825	0.146853	-0.475524	0.391608
2,3,5-trihydroxypyrazine	-0.384615	-0.013986	0.111888	0.601399	-0.559441	-0.538462	-0.314685	0.0979021	-0.0769231	0.104895	0.111888	-0.0909091	0.188811	0.00699301	0.398601	0.216783	0.51049	0.321678	0.692308	-0.538462	0.202797	-0.244755	-0.0559441	1	0.469353	0.293706	-0.13986	0.321678	0.020979	-0.181818	-0.0839161	0.167832	-0.405594	-0.272727	-0.601399	0.622378	-0.706294	-0.384615	-0.755245	-0.0559441	-0.713287	0.048951	-0.468531	0.181818	0.0839161	-0.531469	-0.132867	0.0559441	0.104895
2,5-furandicarboxylic acid	-0.182137	0.189142	0.290718	0.654992	-0.795098	-0.311734	0.19965	0.161121	-0.164624	-0.346761	-0.301226	-0.33275	-0.0805605	-0.0105079	0.595447	0.0805605	0.847637	-0.0315237	0.788092	-0.33275	-0.0980737	-0.381787	-0.220666	0.469353	1	-0.0105079	0.353766	0.336253	-0.577934	0.574432	-0.0490369	0.0175132	-0.101576	-0.0560421	-0.395797	0.735553	-0.525395	-0.325745	-0.609458	-0.238179	-0.434326	-0.325745	-0.602453	-0.0280211	0.423818	-0.276708	0.248687	0.0630474	-0.171629
2-ketoisocaproic acid	-0.307692	0.181818	0.321678	-0.146853	-0.0559441	-0.034965	-0.20979	0.244755	-0.048951	0.146853	-0.34965	0.0699301	0.13986	-0.188811	-0.314685	0.132867	0.188811	-0.517483	-0.00699301	0.0629371	0.909091	-0.405594	-0.167832	0.293706	-0.0105079	1	-0.363636	0.013986	0.468531	-0.272727	0.160839	0.13986	0.251748	0.412587	0.307692	0.041958	-0.0769231	-0.300699	-0.244755	0.195804	0.00699301	-0.125874	0.13986	0.370629	-0.125874	-0.370629	-0.300699	0.0559441	-0.0839161
5-hydroxymethyl-2-furoic acid	0.321678	-0.20979	-0.160839	0.0979021	-0.027972	0.524476	0.706294	-0.237762	-0.020979	0.0909091	0.391608	-0.195804	-0.454545	-0.244755	0.0909091	0.174825	0.174825	-0.104895	0.146853	0.321678	-0.321678	0.300699	-0.027972	-0.13986	0.353766	-0.363636	1	-0.111888	-0.433566	0.118881	0.356643	0.27972	0.454545	0.433566	-0.146853	-0.027972	-0.237762	0.160839	0.20979	0.027972	0.0769231	-0.524476	-0.307692	0	0.426573	-0.307692	-0.118881	0.223776	-0.0839161
adenosine-5-phosphate	0.160839	0.699301	0.706294	0	-0.132867	-0.342657	0.237762	-0.0769231	0.48951	-0.104895	-0.027972	0.335664	0.202797	0.783217	0.160839	-0.713287	0.482517	0.20979	0.0839161	-0.027972	-0.00699301	-0.013986	0.398601	0.321678	0.336253	0.013986	-0.111888	1	-0.0769231	0.118881	0.0909091	-0.664336	0.0769231	-0.0699301	0.153846	0.0839161	-0.0559441	-0.622378	-0.258741	-0.20979	0.020979	-0.041958	-0.0839161	-0.482517	0.251748	-0.216783	0.223776	-0.741259	0.272727
alphaketoglutaric acid	0.00699301	0.174825	0.251748	-0.363636	0.377622	-0.160839	-0.188811	-0.20979	-0.013986	0.0979021	-0.034965	0.153846	0.181818	0.048951	-0.664336	-0.132867	-0.160839	-0.300699	-0.377622	0.174825	0.573427	-0.027972	0.265734	0.020979	-0.577934	0.468531	-0.433566	-0.0769231	1	-0.79021	0.293706	-0.118881	0.153846	0.146853	0.398601	-0.447552	0.27972	-0.048951	0.118881	0.293706	0.181818	0.153846	0.174825	0.111888	-0.79021	-0.167832	-0.573427	-0.307692	0.454545
arginine..ornithine	-0.027972	-0.041958	-0.0769231	0.370629	-0.475524	-0.118881	0.146853	0.181818	-0.251748	-0.41958	-0.447552	-0.384615	-0.265734	0	0.636364	0.0699301	0.356643	0.00699301	0.34965	-0.202797	-0.41958	-0.335664	-0.181818	-0.181818	0.574432	-0.272727	0.118881	0.118881	-0.79021	1	-0.398601	-0.0979021	-0.153846	-0.174825	-0.167832	0.482517	-0.0839161	0.0979021	-0.118881	-0.475524	0.027972	-0.00699301	-0.230769	-0.0559441	0.608392	0.398601	0.636364	0.181818	-0.223776
aspartic acid	0.237762	0.34965	0.125874	-0.13986	0.34965	0.125874	0.636364	-0.454545	0.041958	-0.293706	0.335664	0.111888	-0.384615	-0.104895	-0.300699	-0.125874	0.13986	-0.0979021	-0.048951	0.293706	0.286713	-0.153846	0.433566	-0.0839161	-0.0490369	0.160839	0.356643	0.0909091	0.293706	-0.398601	1	0.153846	0.314685	0.356643	0.398601	-0.356643	-0.251748	0.00699301	0.118881	-0.230769	-0.020979	-0.671329	0.0559441	0.307692	-0.146853	-0.503497	-0.041958	-0.104895	-0.216783
AUC_199773	0.041958	-0.594406	-0.657343	0.433566	0	0.258741	0.013986	-0.00699301	-0.622378	0.111888	0.398601	-0.475524	-0.258741	-0.685315	0.314685	0.748252	-0.0909091	-0.0839161	0.412587	0.111888	0.0839161	-0.0699301	-0.27972	0.167832	0.0175132	0.13986	0.27972	-0.664336	-0.118881	-0.0979021	0.153846	1	-0.13986	0.027972	-0.426573	0.230769	-0.468531	0.496504	0.0629371	0.00699301	-0.300699	-0.034965	-0.0629371	0.706294	0.160839	0	0.0839161	0.853147	-0.468531
AUC_199777	0.20979	0.160839	0.328671	-0.496504	0.237762	0.692308	0.447552	0.118881	0.328671	0.230769	-0.020979	0.328671	-0.0769231	-0.048951	-0.559441	-0.153846	-0.0839161	-0.503497	-0.461538	0.748252	0.223776	0.300699	-0.195804	-0.405594	-0.101576	0.251748	0.454545	0.0769231	0.153846	-0.153846	0.314685	-0.13986	1	0.93007	0.440559	-0.440559	0.300699	-0.118881	0.41958	0.34965	0.622378	-0.447552	0.34965	-0.104895	0.041958	-0.153846	-0.405594	-0.188811	0.104895
AUC_199794	-0.0699301	0.0629371	0.188811	-0.398601	0.0839161	0.685315	0.307692	0.265734	0.251748	0.251748	-0.034965	0.27972	-0.223776	-0.307692	-0.573427	0.0839161	-0.0839161	-0.433566	-0.342657	0.559441	0.384615	0.167832	-0.293706	-0.272727	-0.0560421	0.412587	0.433566	-0.0699301	0.146853	-0.174825	0.356643	0.027972	0.93007	1	0.363636	-0.265734	0.0769231	-0.167832	0.195804	0.314685	0.377622	-0.615385	0.34965	0.181818	0.034965	-0.342657	-0.503497	-0.020979	-0.00699301
AUC_211972	0.300699	0.594406	0.482517	-0.783217	0.573427	0.272727	0.300699	-0.13986	0.34965	0.020979	-0.188811	0.286713	-0.027972	0.34965	-0.65035	-0.608392	-0.167832	-0.496504	-0.692308	0.433566	0.496504	0.0699301	0.41958	-0.601399	-0.395797	0.307692	-0.146853	0.153846	0.398601	-0.167832	0.398601	-0.426573	0.440559	0.363636	1	-0.622378	0.65035	-0.230769	0.391608	0.174825	0.559441	-0.174825	0.426573	-0.216783	-0.20979	-0.020979	-0.0769231	-0.524476	0.034965
AUC_213961	-0.461538	-0.0629371	-0.048951	0.839161	-0.909091	-0.412587	-0.328671	0.454545	-0.384615	-0.153846	-0.188811	-0.468531	-0.125874	-0.181818	0.671329	0.356643	0.587413	0.251748	0.867133	-0.573427	-0.020979	-0.328671	-0.293706	0.622378	0.735553	0.041958	-0.027972	0.0839161	-0.447552	0.482517	-0.356643	0.230769	-0.440559	-0.265734	-0.622378	1	-0.636364	-0.300699	-0.804196	-0.188811	-0.734266	-0.027972	-0.412587	0.328671	0.251748	-0.111888	0.181818	0.223776	-0.0769231
AUC_226842	0.391608	0.237762	0.321678	-0.755245	0.559441	0.321678	-0.041958	0.00699301	0.328671	0.244755	-0.237762	0.272727	0.405594	0.440559	-0.524476	-0.552448	-0.447552	-0.454545	-0.783217	0.475524	0.048951	0.426573	0.0699301	-0.706294	-0.525395	-0.0769231	-0.237762	-0.0559441	0.27972	-0.0839161	-0.251748	-0.468531	0.300699	0.0769231	0.65035	-0.636364	1	0.00699301	0.622378	0.496504	0.748252	0.405594	0.41958	-0.615385	-0.286713	0.51049	-0.0979021	-0.41958	0.20979
AUC_226848	0.293706	-0.727273	-0.748252	0.104895	0.34965	0.0909091	0.216783	-0.48951	-0.594406	-0.272727	0.111888	-0.405594	-0.314685	-0.496504	0.195804	0.545455	-0.328671	-0.0769231	-0.0629371	0.167832	-0.454545	-0.167832	-0.041958	-0.384615	-0.325745	-0.300699	0.160839	-0.622378	-0.048951	0.0979021	0.00699301	0.496504	-0.118881	-0.167832	-0.230769	-0.300699	0.00699301	1	0.601399	-0.363636	0.314685	0.230769	-0.118881	0.300699	0.048951	0.468531	0.237762	0.685315	-0.125874
AUC_232946	0.72028	-0.20979	-0.20979	-0.559441	0.825175	0.559441	0.440559	-0.41958	0.013986	0.13986	0.251748	0.0769231	-0.013986	0.0839161	-0.272727	-0.153846	-0.545455	-0.342657	-0.664336	0.762238	-0.251748	0.398601	0.153846	-0.755245	-0.609458	-0.244755	0.20979	-0.258741	0.118881	-0.118881	0.118881	0.0629371	0.41958	0.195804	0.391608	-0.804196	0.622378	0.601399	1	0.118881	0.846154	0.244755	0.34965	-0.230769	0.048951	0.51049	0.111888	0.0839161	0.00699301
AUC_235972	0.034965	0.0769231	0.293706	-0.41958	0.160839	0.503497	-0.328671	0.426573	0.363636	0.748252	0.104895	0.293706	0.559441	0.118881	-0.517483	-0.174825	-0.314685	-0.363636	-0.34965	0.363636	0.363636	0.671329	-0.342657	-0.0559441	-0.238179	0.195804	0.027972	-0.20979	0.293706	-0.475524	-0.230769	0.00699301	0.34965	0.314685	0.174825	-0.188811	0.496504	-0.363636	0.118881	1	0.153846	0.181818	0.314685	-0.335664	-0.314685	-0.041958	-0.587413	-0.181818	0.104895
AUC_241882	0.573427	0.020979	0.174825	-0.657343	0.615385	0.440559	0.398601	-0.265734	0.153846	0.0979021	-0.160839	0.160839	0.0839161	0.244755	-0.384615	-0.328671	-0.300699	-0.559441	-0.713287	0.727273	-0.0629371	0.237762	0.0839161	-0.713287	-0.434326	0.00699301	0.0769231	0.020979	0.181818	0.027972	-0.020979	-0.300699	0.622378	0.377622	0.559441	-0.734266	0.748252	0.314685	0.846154	0.153846	1	0.20979	0.293706	-0.405594	0.0559441	0.433566	-0.013986	-0.181818	0.223776
AUC_271416	0.307692	-0.230769	-0.0979021	0.034965	0.188811	-0.272727	-0.412587	-0.0979021	-0.223776	0.258741	-0.00699301	-0.223776	0.454545	0.377622	0.265734	-0.104895	-0.195804	-0.027972	-0.0769231	-0.013986	-0.167832	0.195804	0.0909091	0.048951	-0.325745	-0.125874	-0.524476	-0.041958	0.153846	-0.00699301	-0.671329	-0.034965	-0.447552	-0.615385	-0.174825	-0.027972	0.405594	0.230769	0.244755	0.181818	0.20979	1	-0.048951	-0.307692	-0.0699301	0.622378	0.174825	-0.00699301	0.342657
AUC_281268	-0.020979	0.216783	0.020979	-0.545455	0.461538	0.545455	-0.244755	0.482517	0.440559	0.258741	0.146853	0.629371	0.251748	0.0629371	-0.482517	-0.237762	-0.699301	0.0699301	-0.615385	0.482517	0.188811	0.384615	-0.20979	-0.468531	-0.602453	0.13986	-0.307692	-0.0839161	0.174825	-0.230769	0.0559441	-0.0629371	0.34965	0.34965	0.426573	-0.412587	0.41958	-0.118881	0.34965	0.314685	0.293706	-0.048951	1	0.027972	-0.202797	0.321678	0.034965	-0.160839	-0.321678
AUC_285340	-0.335664	-0.384615	-0.552448	0.41958	-0.188811	-0.00699301	-0.0769231	0.0839161	-0.622378	-0.181818	0.118881	-0.41958	-0.594406	-0.755245	0.125874	0.734266	0.020979	0.048951	0.370629	-0.13986	0.307692	-0.440559	-0.104895	0.181818	-0.0280211	0.370629	0	-0.482517	0.111888	-0.0559441	0.307692	0.706294	-0.104895	0.181818	-0.216783	0.328671	-0.615385	0.300699	-0.230769	-0.335664	-0.405594	-0.307692	0.027972	1	-0.034965	-0.188811	-0.027972	0.615385	-0.251748
AUC_295002	0.223776	-0.181818	-0.181818	0.188811	-0.118881	0.230769	0.398601	-0.041958	0.013986	0.13986	0.181818	-0.181818	-0.27972	0.0629371	0.594406	0.0839161	0.20979	0.0979021	0.244755	0.034965	-0.286713	0.020979	0.00699301	0.0839161	0.423818	-0.125874	0.426573	0.251748	-0.79021	0.608392	-0.146853	0.160839	0.041958	0.034965	-0.20979	0.251748	-0.286713	0.048951	0.048951	-0.314685	0.0559441	-0.0699301	-0.202797	-0.034965	1	-0.020979	0.482517	0.272727	-0.265734
AUC_299159	0.34965	-0.167832	-0.216783	0.00699301	0.202797	0.0559441	-0.160839	0.0979021	-0.272727	-0.174825	-0.167832	-0.160839	0.223776	0.146853	0.258741	-0.0699301	-0.335664	-0.0699301	-0.181818	0.293706	-0.447552	0.118881	-0.174825	-0.531469	-0.276708	-0.370629	-0.307692	-0.216783	-0.167832	0.398601	-0.503497	0	-0.153846	-0.342657	-0.020979	-0.111888	0.51049	0.468531	0.51049	-0.041958	0.433566	0.622378	0.321678	-0.188811	-0.020979	1	0.524476	0.125874	-0.0769231
AUC_299211	0.328671	0.146853	-0.118881	0.321678	0.020979	-0.216783	0.223776	-0.125874	-0.20979	-0.496504	-0.00699301	-0.188811	-0.034965	0.244755	0.699301	-0.160839	0.153846	0.20979	0.286713	-0.013986	-0.398601	-0.27972	0.146853	-0.132867	0.248687	-0.300699	-0.118881	0.223776	-0.573427	0.636364	-0.041958	0.0839161	-0.405594	-0.503497	-0.0769231	0.181818	-0.0979021	0.237762	0.111888	-0.587413	-0.013986	0.174825	0.034965	-0.027972	0.482517	0.524476	1	0.13986	-0.51049
AUC_369638	-0.167832	-0.818182	-0.797203	0.398601	-0.111888	0.174825	-0.0769231	0.013986	-0.615385	-0.041958	0.0769231	-0.447552	-0.272727	-0.825175	0.363636	0.902098	-0.153846	-0.048951	0.342657	-0.0909091	-0.13986	-0.272727	-0.475524	0.0559441	0.0630474	0.0559441	0.223776	-0.741259	-0.307692	0.181818	-0.104895	0.853147	-0.188811	-0.020979	-0.524476	0.223776	-0.41958	0.685315	0.0839161	-0.181818	-0.181818	-0.00699301	-0.160839	0.615385	0.272727	0.125874	0.13986	1	-0.482517
AUC_4-hydroxybenzoate	0.125874	0	0.230769	-0.0769231	-0.041958	-0.265734	-0.013986	-0.265734	-0.020979	0.188811	-0.041958	-0.160839	-0.0909091	0.335664	-0.195804	-0.20979	0.153846	-0.048951	-0.153846	-0.041958	-0.027972	0.188811	0.391608	0.104895	-0.171629	-0.0839161	-0.0839161	0.272727	0.454545	-0.223776	-0.216783	-0.468531	0.104895	-0.00699301	0.034965	-0.0769231	0.20979	-0.125874	0.00699301	0.104895	0.223776	0.342657	-0.321678	-0.251748	-0.265734	-0.0769231	-0.51049	-0.482517	1
AUC_alphaketoglutaric acid	-0.0699301	-0.020979	0.118881	0.111888	-0.328671	0.230769	-0.342657	0.678322	-0.00699301	0.034965	-0.398601	0.020979	0.433566	0.027972	0.167832	-0.00699301	-0.0699301	-0.188811	0.041958	0.216783	-0.230769	0.195804	-0.706294	-0.251748	0.206655	-0.13986	-0.0909091	-0.125874	-0.363636	0.475524	-0.643357	-0.0559441	0.13986	0.048951	-0.174825	0.272727	0.356643	-0.0559441	0.0559441	0.356643	0.188811	0.265734	0.286713	-0.272727	0.034965	0.65035	0.188811	0.0699301	-0.174825
AUC_arachidic acid	0.195804	-0.524476	-0.391608	0.321678	-0.00699301	-0.181818	0.230769	-0.412587	-0.72028	-0.475524	-0.202797	-0.524476	-0.321678	-0.412587	0.216783	0.48951	0.111888	-0.251748	0.153846	0.160839	-0.307692	-0.405594	-0.0769231	-0.174825	-0.0560421	-0.0839161	0.0839161	-0.335664	0.13986	0.160839	-0.013986	0.27972	0.0559441	-0.013986	-0.265734	-0.0699301	-0.0909091	0.783217	0.356643	-0.426573	0.328671	0.188811	-0.307692	0.321678	-0.0909091	0.384615	0.0839161	0.454545	0.230769
AUC_arginine..ornithine	0.335664	-0.0979021	0.0769231	0.0909091	0.174825	-0.342657	0.013986	-0.405594	-0.552448	-0.153846	-0.153846	-0.41958	0.034965	0.0559441	-0.0629371	0.048951	0.160839	-0.440559	-0.00699301	0.237762	0.195804	-0.20979	0.244755	0.013986	-0.283713	0.244755	-0.314685	-0.0839161	0.678322	-0.286713	-0.00699301	0.0559441	0.00699301	-0.111888	0.0699301	-0.174825	0.202797	0.342657	0.265734	-0.013986	0.335664	0.51049	-0.202797	0.125874	-0.447552	0.272727	-0.167832	-0.034965	0.566434
AUC_aspartic acid	-0.27972	-0.013986	-0.020979	-0.0559441	-0.160839	-0.0769231	-0.692308	0.552448	0.27972	0.153846	-0.251748	0.265734	0.58042	0.237762	0.125874	-0.160839	-0.363636	0.307692	-0.118881	-0.300699	-0.307692	0.244755	-0.398601	-0.0979021	-0.0700526	-0.314685	-0.468531	-0.0629371	-0.307692	0.286713	-0.769231	-0.272727	-0.41958	-0.468531	-0.181818	0.181818	0.377622	-0.153846	-0.118881	0.272727	-0.104895	0.482517	0.286713	-0.440559	-0.0699301	0.538462	0.223776	-0.0839161	-0.160839
AUC_behenic acid	-0.034965	0.0769231	0.167832	0.0979021	-0.00699301	-0.699301	0.111888	-0.573427	-0.265734	-0.454545	-0.286713	-0.174825	-0.167832	0.0839161	-0.048951	-0.020979	0.377622	-0.0699301	0.0769231	-0.265734	0.160839	-0.601399	0.468531	0.265734	-0.0560421	0.265734	-0.335664	0.286713	0.552448	-0.195804	0.230769	-0.27972	-0.146853	-0.174825	0.0769231	-0.111888	-0.160839	0.132867	-0.118881	-0.496504	0.0629371	0.0979021	-0.433566	0.118881	-0.300699	-0.216783	-0.125874	-0.202797	0.531469
AUC_cystine	-0.622378	-0.0979021	0.146853	0.195804	-0.447552	-0.342657	-0.391608	0.300699	0.0979021	-0.132867	-0.391608	0.307692	0.237762	-0.20979	-0.0769231	0.272727	0.174825	0.13986	0.167832	-0.272727	0.125874	-0.398601	-0.447552	0.496504	0.150613	0.412587	-0.314685	0.223776	0.223776	-0.111888	-0.174825	-0.181818	0.118881	0.202797	-0.356643	0.216783	-0.342657	-0.160839	-0.41958	-0.118881	-0.13986	-0.0979021	-0.041958	0.132867	-0.174825	-0.237762	-0.314685	0.013986	0.195804
AUC_fumaric acid	0.293706	0.216783	0.293706	-0.391608	0.307692	-0.041958	-0.132867	-0.125874	0.307692	0.363636	0.160839	0.188811	0.202797	0.615385	-0.363636	-0.552448	-0.244755	0.0839161	-0.48951	0.167832	-0.0769231	0.559441	0.433566	-0.160839	-0.493871	-0.251748	-0.251748	0.293706	0.468531	-0.356643	-0.237762	-0.58042	0.0839161	-0.104895	0.265734	-0.342657	0.559441	-0.223776	0.237762	0.342657	0.335664	0.482517	0.146853	-0.496504	-0.377622	0.181818	-0.356643	-0.692308	0.804196
AUC_gamma-tocopherol	-0.846154	-0.552448	-0.447552	0.314685	-0.545455	-0.272727	-0.608392	0.307692	-0.167832	0.034965	-0.258741	-0.111888	-0.0909091	-0.622378	0.0699301	0.692308	-0.048951	0.307692	0.307692	-0.776224	0	-0.328671	-0.447552	0.41958	0.157618	0.104895	-0.13986	-0.426573	-0.104895	0.041958	-0.370629	0.20979	-0.412587	-0.146853	-0.545455	0.461538	-0.447552	0.0559441	-0.58042	-0.0629371	-0.58042	-0.0839161	-0.307692	0.356643	-0.0909091	-0.300699	-0.342657	0.475524	-0.041958
AUC_glutamineminor	-0.328671	-0.524476	-0.601399	0.447552	-0.237762	-0.125874	-0.181818	0.132867	-0.440559	-0.475524	-0.216783	-0.174825	-0.0839161	-0.622378	0.461538	0.664336	-0.0909091	0.188811	0.356643	-0.244755	-0.328671	-0.531469	-0.531469	0.013986	0.164624	-0.048951	-0.0839161	-0.433566	-0.412587	0.41958	-0.153846	0.496504	-0.321678	-0.20979	-0.503497	0.265734	-0.398601	0.587413	-0.041958	-0.48951	-0.202797	-0.041958	-0.00699301	0.447552	0.195804	0.335664	0.482517	0.776224	-0.622378
AUC_glycine	0.517483	-0.0979021	-0.202797	0.321678	0.244755	0.048951	0.237762	-0.27972	-0.643357	-0.048951	0.34965	-0.538462	-0.0979021	-0.146853	0.300699	0.20979	0.132867	-0.342657	0.321678	0.384615	0.237762	-0.0769231	0.160839	0.0559441	-0.0490369	0.195804	0.0629371	-0.300699	0.167832	-0.160839	0.314685	0.727273	-0.125874	-0.132867	-0.034965	0.041958	-0.146853	0.363636	0.244755	0	-0.034965	0.216783	-0.041958	0.447552	0	0.195804	0.293706	0.398601	-0.258741
AUC_histidine	0.160839	0.153846	0.167832	0.167832	0.027972	-0.454545	0.48951	-0.713287	-0.251748	-0.573427	-0.041958	-0.20979	-0.251748	-0.048951	-0.0769231	-0.027972	0.468531	-0.132867	0.20979	-0.0909091	0.00699301	-0.433566	0.433566	0.13986	0.168126	-0.027972	0.216783	0.118881	0.384615	-0.272727	0.636364	-0.0629371	-0.013986	-0.0629371	0.0559441	-0.174825	-0.251748	0.188811	-0.041958	-0.377622	-0.0559441	-0.300699	-0.552448	0.0699301	-0.34965	-0.384615	-0.132867	-0.118881	0.237762
AUC_isolinoleic acid	-0.307692	-0.153846	0.041958	0.72028	-0.734266	-0.300699	-0.202797	0.391608	-0.405594	-0.27972	-0.405594	-0.307692	0.167832	-0.258741	0.608392	0.41958	0.559441	-0.0979021	0.734266	-0.188811	-0.020979	-0.482517	-0.608392	0.503497	0.690019	0.265734	-0.048951	0.0699301	-0.356643	0.468531	-0.342657	0.286713	-0.111888	-0.048951	-0.601399	0.713287	-0.482517	-0.020979	-0.454545	-0.174825	-0.293706	0.041958	-0.300699	0.230769	0.272727	0.104895	0.258741	0.398601	-0.223776
AUC_lactic acid	-0.237762	0.0699301	0.370629	-0.00699301	-0.27972	-0.118881	-0.454545	0.440559	-0.146853	0.0909091	-0.685315	-0.0909091	0.552448	-0.048951	-0.0699301	0.0769231	0.20979	-0.643357	0.0839161	0.00699301	0.51049	-0.272727	-0.531469	0.132867	0.189142	0.622378	-0.41958	-0.132867	0.181818	0.0979021	-0.447552	0.013986	0.048951	0.0629371	0.0699301	0.20979	0.286713	-0.188811	-0.174825	0.433566	0.118881	0.314685	-0.013986	-0.0909091	-0.174825	0.174825	-0.132867	0.0979021	-0.0699301
AUC_levoglucosan	-0.237762	-0.153846	0	-0.321678	0.244755	-0.13986	-0.503497	0.041958	0.104895	-0.041958	-0.293706	0.377622	0.559441	-0.118881	-0.51049	0.0559441	-0.454545	-0.0909091	-0.412587	0	0.034965	-0.020979	-0.314685	-0.13986	-0.51839	0.0909091	-0.48951	-0.321678	0.594406	-0.482517	-0.181818	-0.160839	-0.027972	-0.0909091	0.027972	-0.433566	0.412587	0.237762	0.202797	0.300699	0.216783	0.307692	0.244755	-0.181818	-0.755245	0.251748	-0.363636	-0.013986	0.125874
AUC_N-methylalanine	0.363636	0.545455	0.573427	-0.65035	0.412587	0.0699301	0.34965	-0.356643	0.587413	0.0769231	-0.013986	0.377622	0.146853	0.629371	-0.538462	-0.783217	-0.041958	-0.153846	-0.58042	0.20979	-0.020979	0.370629	0.51049	-0.377622	-0.203153	-0.251748	0.118881	0.398601	0.272727	-0.244755	0.230769	-0.741259	0.300699	0.0909091	0.629371	-0.587413	0.608392	-0.314685	0.286713	0.244755	0.433566	-0.0699301	0.00699301	-0.727273	-0.251748	-0.146853	-0.258741	-0.783217	0.41958
AUC_oleamide	-0.0769231	-0.482517	-0.559441	0.013986	0.321678	0.188811	0.0629371	-0.181818	-0.195804	-0.0629371	0.356643	0.13986	-0.258741	-0.552448	-0.132867	0.531469	-0.398601	0.195804	-0.111888	0.216783	-0.020979	-0.13986	-0.111888	0.00699301	-0.444834	0.167832	0.027972	-0.321678	0.265734	-0.384615	0.370629	0.482517	0.174825	0.272727	-0.195804	-0.300699	-0.356643	0.545455	0.286713	-0.286713	0.0629371	-0.181818	0.286713	0.601399	-0.0769231	-0.0559441	-0.0839161	0.48951	-0.167832
AUC_oxoproline	0.237762	-0.440559	-0.391608	0.27972	0.034965	0.321678	-0.153846	0.132867	-0.405594	0.468531	0.538462	-0.363636	-0.0769231	-0.216783	0.104895	0.356643	-0.223776	0.00699301	0.146853	0.328671	-0.0559441	0.51049	-0.132867	0.0839161	-0.245184	-0.125874	0.174825	-0.412587	0.153846	-0.293706	-0.174825	0.566434	0.041958	0.0559441	-0.377622	0.153846	-0.0699301	0.223776	0.174825	0.398601	-0.0769231	0.342657	0.0979021	0.321678	-0.118881	0.223776	-0.251748	0.293706	0.237762
AUC_palmitoleic acid	-0.0979021	-0.391608	-0.27972	0.454545	-0.34965	0.398601	0.020979	0.363636	-0.146853	0.321678	0.321678	-0.132867	0.00699301	-0.433566	0.391608	0.531469	0.125874	0.020979	0.503497	0.132867	-0.041958	0.153846	-0.587413	0.391608	0.437829	0.0979021	0.503497	-0.20979	-0.482517	0.104895	-0.0699301	0.678322	0.153846	0.272727	-0.594406	0.447552	-0.531469	0.020979	-0.174825	0.202797	-0.314685	-0.20979	-0.0769231	0.307692	0.48951	-0.181818	0.00699301	0.594406	-0.433566
AUC_phenol	-0.125874	-0.041958	0.321678	0.230769	-0.461538	-0.13986	-0.181818	0.314685	-0.258741	-0.195804	-0.713287	-0.202797	0.412587	-0.104895	0.125874	0.146853	0.391608	-0.573427	0.251748	0.0839161	0.0629371	-0.293706	-0.629371	0.0559441	0.434326	0.258741	-0.0839161	-0.0699301	-0.041958	0.328671	-0.440559	-0.041958	0.181818	0.104895	-0.181818	0.272727	0.174825	0.013986	-0.0909091	0.223776	0.20979	0.195804	-0.230769	-0.188811	-0.0909091	0.293706	-0.048951	0.13986	0.034965
AUC_propane-1,2,3-tricarboxylate	0.594406	0.0699301	0.020979	-0.608392	0.664336	0.58042	0.342657	-0.104895	0.048951	0.041958	-0.0699301	0.0769231	0.027972	0.13986	-0.307692	-0.293706	-0.440559	-0.524476	-0.664336	0.755245	-0.041958	0.27972	0.034965	-0.895105	-0.462347	-0.0769231	0.0629371	-0.216783	0.027972	0.132867	0.041958	-0.0629371	0.468531	0.27972	0.629371	-0.65035	0.769231	0.356643	0.86014	0.181818	0.846154	0.153846	0.51049	-0.237762	0.041958	0.608392	0.230769	-0.034965	-0.153846
AUC_salicylaldehyde	-0.286713	0.048951	0.13986	0.265734	-0.405594	-0.643357	-0.321678	-0.00699301	-0.244755	-0.468531	-0.496504	-0.188811	0.00699301	0.0769231	0	-0.027972	0.230769	0.125874	0.132867	-0.398601	-0.20979	-0.307692	0.041958	0.0559441	0.0455342	-0.195804	-0.391608	0.0909091	0.307692	0.0979021	-0.300699	-0.454545	-0.258741	-0.307692	-0.160839	0.216783	0.0699301	0.00699301	-0.27972	-0.216783	-0.0839161	0.237762	-0.272727	-0.0839161	-0.559441	0.223776	-0.160839	-0.300699	0.601399
AUC_stearic acid	0.0559441	0.020979	0.111888	0.104895	-0.041958	-0.342657	0.188811	-0.27972	-0.517483	-0.48951	-0.454545	-0.363636	-0.328671	-0.13986	-0.0559441	0.132867	0.335664	-0.426573	0.034965	0.132867	0.265734	-0.608392	0.181818	-0.0839161	-0.0560421	0.41958	-0.251748	0.0559441	0.461538	0.0699301	0.174825	-0.0699301	0.202797	0.188811	0.216783	-0.0559441	-0.013986	0.265734	0.0979021	-0.41958	0.335664	0.034965	-0.146853	0.363636	-0.216783	0.111888	-0.027972	-0.00699301	0.384615
AUC_stigmasterol	-0.027972	-0.188811	-0.503497	0.412587	0.00699301	0.132867	0.0769231	0.034965	-0.41958	-0.048951	0.51049	-0.286713	-0.440559	-0.461538	0.307692	0.461538	-0.034965	0.230769	0.405594	0.00699301	0.181818	-0.146853	0.048951	0.202797	0.00700526	0.153846	0.125874	-0.307692	-0.118881	-0.0769231	0.426573	0.783217	-0.20979	0.00699301	-0.20979	0.286713	-0.615385	0.188811	-0.13986	-0.265734	-0.48951	-0.272727	0.153846	0.811189	0.181818	-0.146853	0.27972	0.524476	-0.524476
AUC_threonic acid	-0.111888	0.146853	0.0979021	-0.20979	0.020979	0.027972	-0.314685	0.118881	0.111888	0.454545	0.174825	-0.0839161	-0.048951	0.13986	-0.391608	-0.181818	-0.153846	0.027972	-0.174825	-0.20979	0.314685	0.41958	0.300699	0.013986	-0.255692	-0.041958	-0.0979021	-0.167832	0.363636	-0.391608	-0.0699301	-0.132867	-0.160839	-0.0769231	0.230769	0.041958	0.237762	-0.398601	-0.223776	0.51049	-0.265734	0.104895	0	-0.048951	-0.440559	-0.244755	-0.538462	-0.356643	0.412587
AUC_trans-4-hydroxyproline	-0.118881	-0.552448	-0.748252	0.160839	0.00699301	0.412587	-0.223776	0.321678	-0.118881	0.195804	0.328671	-0.0839161	-0.13986	-0.41958	0.335664	0.461538	-0.517483	0.391608	0.0699301	-0.0909091	-0.426573	0.258741	-0.384615	-0.202797	-0.0910684	-0.405594	0.174825	-0.552448	-0.622378	0.314685	-0.307692	0.531469	-0.286713	-0.174825	-0.391608	0.188811	-0.13986	0.370629	0.118881	-0.013986	-0.230769	0.048951	0.265734	0.251748	0.370629	0.34965	0.342657	0.629371	-0.58042
AUC_UDP-glucuronic acid	-0.048951	0.0699301	0.153846	-0.391608	0.377622	0.0979021	-0.223776	0.041958	0.398601	-0.013986	-0.027972	0.671329	0.657343	0.027972	-0.51049	-0.153846	-0.447552	-0.00699301	-0.433566	0.272727	-0.034965	0.167832	-0.321678	-0.146853	-0.420316	0.013986	-0.230769	-0.0909091	0.433566	-0.545455	0.104895	-0.153846	0.202797	0.0839161	0.0769231	-0.559441	0.342657	0.104895	0.300699	0.335664	0.251748	0.048951	0.41958	-0.314685	-0.58042	0.13986	-0.223776	-0.118881	-0.132867
AUC_uric acid	-0.223776	-0.545455	-0.496504	0.272727	-0.034965	-0.34965	-0.58042	0.034965	-0.244755	-0.132867	-0.0699301	0	0.391608	-0.202797	0.286713	0.384615	-0.356643	0.370629	0.104895	-0.328671	-0.447552	-0.125874	-0.356643	0.13986	-0.238179	-0.258741	-0.454545	-0.342657	-0.00699301	-0.00699301	-0.524476	0.188811	-0.573427	-0.601399	-0.587413	0.0629371	-0.034965	0.51049	0.041958	-0.125874	-0.13986	0.58042	-0.00699301	0.00699301	-0.216783	0.51049	0.195804	0.41958	-0.0909091
AUC_uridine	0.188811	-0.216783	-0.195804	0.307692	0	-0.475524	0.447552	-0.678322	-0.468531	-0.741259	-0.244755	-0.356643	-0.293706	-0.160839	0.377622	0.216783	0.356643	-0.0629371	0.258741	-0.132867	-0.356643	-0.671329	0.20979	-0.013986	0.206655	-0.132867	0.0839161	0.041958	-0.0769231	0.293706	0.223776	0.048951	-0.181818	-0.265734	-0.167832	-0.0839161	-0.258741	0.615385	0.167832	-0.769231	0.160839	-0.013986	-0.524476	0.111888	0.13986	0.111888	0.398601	0.286713	-0.00699301
citric acid	0.475524	0.685315	0.671329	-0.265734	0.223776	-0.20979	0.125874	-0.153846	0.496504	0.118881	0.0699301	0.293706	0.433566	1	0.034965	-0.923077	0.160839	0.0699301	-0.216783	0.146853	-0.0629371	0.335664	0.517483	0.00699301	-0.0105079	-0.188811	-0.244755	0.783217	0.048951	0	-0.104895	-0.685315	-0.048951	-0.307692	0.34965	-0.181818	0.440559	-0.496504	0.0839161	0.118881	0.244755	0.377622	0.0629371	-0.755245	0.0629371	0.146853	0.244755	-0.825175	0.335664
cysteine-glycine	0.272727	0.0559441	0.272727	-0.153846	0.13986	0.041958	0.027972	-0.0769231	-0.300699	0.0699301	-0.405594	-0.321678	0.328671	-0.00699301	-0.0909091	-0.013986	0.195804	-0.874126	-0.027972	0.272727	0.482517	-0.174825	-0.13986	-0.125874	0.06655	0.475524	-0.104895	-0.272727	0.223776	-0.00699301	-0.0839161	0.202797	0.0909091	0.027972	0.314685	-0.118881	0.412587	0.0979021	0.216783	0.391608	0.328671	0.293706	-0.160839	-0.111888	-0.0979021	0.160839	-0.027972	0.167832	-0.125874
cystine	-0.0559441	-0.482517	-0.391608	-0.160839	0.111888	0.573427	-0.160839	0.251748	-0.265734	0.48951	0.034965	-0.286713	-0.0769231	-0.559441	-0.188811	0.503497	-0.328671	-0.475524	-0.111888	0.181818	0.321678	0.202797	-0.405594	-0.223776	-0.157618	0.258741	0.223776	-0.79021	-0.041958	-0.0699301	-0.153846	0.615385	0.13986	0.286713	0.041958	-0.013986	0.160839	0.237762	0.195804	0.524476	0.0559441	0.020979	0.0979021	0.307692	0.0559441	0.020979	-0.293706	0.594406	-0.300699
dithiothreitol	-0.174825	-0.041958	0.146853	-0.643357	0.258741	0.454545	-0.251748	0.195804	0.545455	0.664336	0.0979021	0.468531	0.286713	-0.013986	-0.79021	-0.118881	-0.475524	-0.146853	-0.594406	0.132867	0.244755	0.594406	-0.160839	-0.153846	-0.416813	0.0699301	0.104895	-0.230769	0.391608	-0.594406	-0.0699301	-0.223776	0.384615	0.398601	0.258741	-0.426573	0.447552	-0.272727	0.125874	0.783217	0.174825	-0.0699301	0.230769	-0.328671	-0.405594	-0.314685	-0.832168	-0.251748	0.286713
GABA	0.0839161	0.678322	0.321678	-0.125874	0.237762	-0.447552	0.146853	-0.286713	0.188811	-0.552448	-0.034965	0.244755	-0.027972	0.426573	-0.0769231	-0.559441	0.0979021	0.258741	-0.0979021	-0.153846	0.0979021	-0.314685	0.601399	-0.0979021	-0.115587	-0.041958	-0.398601	0.433566	0.223776	-0.0699301	0.496504	-0.398601	-0.286713	-0.328671	0.461538	-0.195804	0.034965	-0.202797	-0.0979021	-0.454545	-0.118881	-0.160839	0.181818	-0.0559441	-0.27972	-0.027972	0.412587	-0.51049	-0.132867
gamma-tocopherol	0.293706	0.545455	0.244755	-0.335664	0.398601	0.0559441	0.0629371	0.020979	-0.041958	-0.265734	-0.153846	0.00699301	0.00699301	0.265734	-0.244755	-0.461538	-0.160839	-0.286713	-0.335664	0.307692	0.307692	-0.048951	0.314685	-0.573427	-0.325745	0.0979021	-0.370629	-0.041958	0.251748	0.034965	0.258741	-0.132867	-0.00699301	-0.0629371	0.72028	-0.27972	0.51049	-0.0559441	0.272727	0.013986	0.244755	0.048951	0.503497	0.020979	-0.328671	0.405594	0.34965	-0.307692	-0.230769
Glucose	0.274655	0.00704243	0.0352121	-0.514097	0.309867	0.718328	0.359164	0.154933	0.352121	0.154933	0.0211273	0.323952	-0.161976	0.0563394	-0.359164	-0.211273	-0.387334	-0.161976	-0.605649	0.654946	-0.274655	0.457758	-0.154933	-0.72537	-0.261027	-0.246485	0.373249	0.0211273	-0.176061	0.190146	-0.00704243	-0.281697	0.767625	0.633819	0.359164	-0.457758	0.478885	0.098594	0.605649	0.147891	0.711285	-0.218315	0.500012	-0.253527	0.190146	0.302824	-0.0704243	-0.176061	0.0845091
glutamic acid	-0.475524	-0.363636	-0.545455	0.027972	0.132867	0.0699301	-0.391608	0.20979	-0.13986	-0.020979	0.125874	0.188811	-0.0629371	-0.629371	-0.111888	0.573427	-0.454545	0.244755	-0.013986	-0.160839	0.265734	-0.300699	-0.300699	0.118881	-0.360771	0.384615	-0.321678	-0.475524	0.160839	-0.27972	0.181818	0.545455	-0.188811	0.0559441	-0.146853	-0.027972	-0.363636	0.286713	-0.0839161	-0.160839	-0.307692	-0.167832	0.412587	0.692308	-0.13986	-0.0839161	0.020979	0.573427	-0.545455
glycine	-0.125874	0.160839	0.265734	0.41958	-0.51049	-0.384615	-0.342657	0.181818	-0.013986	0.167832	0.0769231	-0.195804	0.237762	0.307692	0.188811	-0.160839	0.34965	0.244755	0.426573	-0.377622	-0.0979021	0.272727	0.048951	0.48951	0.325745	-0.27972	-0.034965	0.195804	0.0559441	-0.111888	-0.328671	-0.181818	-0.356643	-0.377622	-0.391608	0.517483	-0.111888	-0.461538	-0.538462	0.328671	-0.51049	0.258741	-0.391608	-0.258741	-0.293706	-0.125874	-0.27972	-0.356643	0.475524
Insulin	-0.426573	-0.202797	-0.118881	-0.0559441	-0.0909091	-0.384615	-0.377622	-0.111888	-0.328671	-0.223776	-0.426573	-0.20979	-0.125874	-0.377622	-0.426573	0.300699	-0.0699301	-0.167832	-0.111888	-0.384615	0.251748	-0.363636	0.020979	-0.041958	-0.287216	0.188811	-0.356643	-0.447552	0.629371	-0.307692	-0.027972	-0.0769231	-0.188811	-0.0769231	0.0839161	-0.0699301	0.104895	0.188811	-0.160839	0.013986	-0.0909091	0.0629371	-0.202797	0.258741	-0.748252	-0.0909091	-0.531469	0.041958	0.398601
kynurenine	0.104895	-0.482517	-0.377622	-0.272727	0.251748	0.755245	-0.13986	0.272727	0.251748	0.727273	0.482517	0.20979	0.167832	-0.195804	-0.223776	0.202797	-0.636364	0.0699301	-0.335664	0.34965	-0.265734	0.818182	-0.405594	-0.237762	-0.329247	-0.328671	0.405594	-0.461538	-0.174825	-0.237762	-0.286713	0.286713	0.27972	0.258741	-0.20979	-0.223776	0.251748	0.153846	0.384615	0.65035	0.160839	0.111888	0.307692	-0.167832	0.0839161	0.132867	-0.356643	0.258741	-0.0559441
lactic acid	0.0909091	-0.041958	-0.251748	-0.552448	0.58042	0.300699	0.041958	-0.174825	0.538462	0.111888	0.405594	0.587413	-0.020979	0.13986	-0.426573	-0.265734	-0.741259	0.51049	-0.671329	0.111888	-0.440559	0.482517	0.230769	-0.482517	-0.640982	-0.552448	0.034965	-0.041958	0.0629371	-0.293706	0.146853	-0.314685	0.0699301	-0.013986	0.20979	-0.636364	0.321678	0.174825	0.440559	-0.013986	0.230769	-0.0769231	0.468531	-0.27972	-0.188811	0.118881	-0.0629371	-0.244755	0.027972
lysine	0.0769231	0.356643	0.272727	0.405594	-0.412587	-0.468531	0.013986	0.048951	0.020979	-0.300699	-0.216783	-0.188811	0.174825	0.503497	0.706294	-0.356643	0.51049	0.223776	0.482517	-0.405594	-0.300699	-0.202797	0.132867	0.237762	0.633976	-0.293706	-0.111888	0.496504	-0.629371	0.671329	-0.321678	-0.265734	-0.531469	-0.615385	-0.181818	0.517483	-0.111888	-0.293706	-0.377622	-0.314685	-0.293706	0.202797	-0.34965	-0.384615	0.454545	0.188811	0.692308	-0.195804	-0.195804
malic acid	0.0559441	-0.0769231	0.174825	0.48951	-0.384615	-0.258741	-0.0979021	0.160839	-0.27972	0	-0.216783	-0.237762	0.342657	0.0979021	0.587413	0.153846	0.48951	-0.20979	0.524476	0.034965	0.0769231	-0.286713	-0.328671	0.524476	0.472855	0.363636	-0.153846	0.286713	-0.20979	0.300699	-0.370629	0.202797	-0.0699301	-0.118881	-0.426573	0.454545	-0.265734	-0.041958	-0.195804	-0.0629371	-0.020979	0.363636	-0.258741	0.00699301	0.412587	0.153846	0.300699	0.230769	-0.0559441
N-methylalanine	-0.356643	-0.363636	-0.482517	0.475524	-0.328671	-0.125874	-0.559441	0.482517	-0.370629	0.034965	-0.041958	-0.251748	0.048951	-0.314685	0.566434	0.48951	-0.111888	0.27972	0.41958	-0.34965	-0.00699301	-0.237762	-0.398601	0.272727	0.105079	0.13986	-0.391608	-0.286713	-0.391608	0.377622	-0.482517	0.503497	-0.545455	-0.370629	-0.468531	0.58042	-0.342657	0.132867	-0.307692	-0.167832	-0.440559	0.307692	0.146853	0.461538	0.300699	0.335664	0.454545	0.573427	-0.475524
oxoproline	0.146853	0.307692	0.118881	0.440559	-0.293706	-0.524476	0.0979021	-0.0839161	-0.293706	-0.636364	-0.335664	-0.370629	-0.013986	0.307692	0.685315	-0.230769	0.461538	0.0909091	0.454545	-0.307692	-0.286713	-0.454545	0.181818	-0.013986	0.490369	-0.265734	-0.20979	0.272727	-0.48951	0.72028	-0.153846	-0.125874	-0.552448	-0.629371	-0.0559441	0.412587	-0.0699301	0.020979	-0.202797	-0.538462	-0.181818	0.181818	-0.265734	-0.125874	0.272727	0.412587	0.846154	-0.041958	-0.293706
phosphoric acid	-0.0559441	-0.132867	0.153846	0.48951	-0.370629	-0.342657	-0.160839	0.041958	-0.307692	0.132867	-0.0909091	-0.265734	0.300699	-0.013986	0.426573	0.265734	0.517483	-0.20979	0.566434	-0.0979021	0.300699	-0.300699	-0.216783	0.755245	0.402803	0.524476	-0.146853	0.202797	0.0629371	-0.041958	-0.20979	0.307692	-0.125874	-0.0979021	-0.454545	0.440559	-0.412587	-0.104895	-0.342657	0.041958	-0.20979	0.300699	-0.405594	0.146853	0.223776	-0.181818	-0.013986	0.244755	0.0769231
pyruvic acid	0.174825	0.293706	0.0699301	-0.699301	0.615385	0.0979021	0.125874	-0.307692	0.426573	0.027972	0.13986	0.377622	-0.181818	0.34965	-0.58042	-0.517483	-0.48951	0.174825	-0.755245	0.0909091	-0.020979	0.265734	0.615385	-0.552448	-0.6655	-0.237762	-0.188811	0.118881	0.363636	-0.27972	0.258741	-0.545455	0.0909091	0.013986	0.664336	-0.657343	0.51049	-0.034965	0.370629	-0.0559441	0.34965	-0.034965	0.377622	-0.244755	-0.314685	0.027972	-0.125874	-0.552448	0.300699
salicylaldehyde	-0.20979	-0.293706	-0.363636	-0.503497	0.293706	0.72028	-0.216783	0.398601	0.468531	0.524476	0.223776	0.461538	0.0979021	-0.27972	-0.356643	0.146853	-0.748252	0.146853	-0.496504	0.111888	-0.0839161	0.503497	-0.405594	-0.384615	-0.350263	-0.13986	0.188811	-0.447552	-0.293706	-0.0699301	-0.153846	0.146853	0.188811	0.27972	0.0909091	-0.286713	0.251748	0.041958	0.251748	0.41958	0.0839161	-0.181818	0.524476	-0.0769231	0.153846	0.020979	-0.160839	0.258741	-0.454545
serine	-0.27972	0.146853	0.146853	0.363636	-0.426573	-0.524476	-0.20979	0.034965	0.0699301	0.13986	0.034965	-0.111888	-0.00699301	0.27972	0.461538	-0.0559441	0.461538	0.363636	0.482517	-0.636364	0.188811	-0.244755	0.272727	0.762238	0.416813	0.223776	-0.237762	0.51049	-0.20979	0.146853	-0.188811	-0.104895	-0.503497	-0.384615	-0.272727	0.566434	-0.503497	-0.48951	-0.685315	-0.244755	-0.566434	0.111888	-0.412587	0.034965	0.412587	-0.447552	0.132867	-0.132867	0.111888
threonic acid	0.307692	-0.132867	-0.132867	0.216783	0.153846	-0.00699301	0.335664	-0.223776	-0.13986	-0.384615	0.104895	0.104895	0.0629371	-0.027972	0.342657	0.0979021	0.034965	0.0839161	0.111888	0.384615	-0.377622	-0.20979	-0.13986	-0.020979	0.0315237	-0.0769231	0.0699301	0.195804	-0.153846	0.146853	0.160839	0.167832	0.174825	0.034965	-0.251748	-0.160839	-0.202797	0.454545	0.363636	-0.454545	0.300699	0.027972	0.118881	0.0699301	0.265734	0.335664	0.48951	0.244755	-0.237762
trans-4-hydroxyproline	0.041958	0.622378	0.776224	-0.0769231	-0.118881	-0.454545	0.188811	-0.195804	0.0559441	-0.258741	-0.440559	0.020979	0.0979021	0.398601	-0.20979	-0.433566	0.622378	-0.426573	0.041958	0.034965	0.545455	-0.41958	0.342657	0.251748	0.213661	0.559441	-0.265734	0.601399	0.51049	-0.13986	0.27972	-0.482517	0.237762	0.174825	0.41958	-0.027972	0.0559441	-0.447552	-0.237762	-0.0839161	0.160839	-0.0839161	-0.230769	-0.132867	-0.230769	-0.335664	-0.181818	-0.573427	0.433566
tryptophan	0.202797	0.027972	0.174825	-0.615385	0.447552	0.685315	-0.118881	0.265734	0.335664	0.797203	0.265734	0.307692	0.258741	0.0909091	-0.664336	-0.174825	-0.482517	-0.391608	-0.601399	0.615385	0.433566	0.706294	-0.111888	-0.258741	-0.539405	0.286713	0.048951	-0.188811	0.447552	-0.559441	-0.034965	0.020979	0.587413	0.552448	0.398601	-0.440559	0.538462	-0.216783	0.391608	0.846154	0.41958	0.125874	0.517483	-0.13986	-0.237762	-0.027972	-0.608392	-0.202797	0.237762
uric acid	0.132867	0.370629	0.370629	-0.314685	0.195804	0.0629371	0.118881	-0.153846	0.251748	0.524476	0.300699	0.020979	-0.125874	0.335664	-0.34965	-0.34965	0.13986	-0.160839	-0.160839	0.027972	0.629371	0.258741	0.573427	0.244755	-0.129597	0.384615	0.020979	0.286713	0.405594	-0.468531	0.300699	-0.13986	0.132867	0.195804	0.440559	-0.0979021	0.041958	-0.552448	-0.167832	0.328671	-0.0839161	-0.0769231	-0.0699301	-0.013986	-0.027972	-0.615385	-0.447552	-0.454545	0.384615
uridine	0.0699301	-0.111888	0.0699301	-0.461538	0.356643	0.552448	-0.181818	0.195804	0.377622	0.888112	0.447552	0.363636	0.258741	0.041958	-0.552448	-0.034965	-0.433566	-0.13986	-0.440559	0.41958	0.391608	0.678322	-0.0909091	0.0909091	-0.483363	0.307692	0.0699301	-0.0909091	0.440559	-0.699301	-0.020979	0.0979021	0.461538	0.475524	0.125874	-0.335664	0.230769	-0.244755	0.20979	0.755245	0.195804	0.111888	0.363636	-0.0629371	-0.146853	-0.272727	-0.692308	-0.125874	0.293706
QUICKI	0.41958	0.174825	0.0979021	0.0979021	0.0629371	0.335664	0.391608	0.0769231	0.265734	0.202797	0.398601	0.13986	0.0769231	0.356643	0.482517	-0.258741	0.125874	0.146853	0.160839	0.342657	-0.223776	0.286713	0.00699301	0.0839161	0.322242	-0.13986	0.342657	0.454545	-0.643357	0.34965	0.020979	0.104895	0.153846	0.0559441	-0.0979021	0.111888	-0.153846	-0.167832	0.132867	-0.0769231	0.0769231	-0.048951	0.13986	-0.20979	0.804196	0.0699301	0.559441	0	-0.391608
Matsuda	0.328671	-0.00699301	-0.048951	0.48951	-0.251748	0.104895	0.398601	0	-0.160839	-0.041958	0.230769	-0.307692	-0.0769231	0.0909091	0.769231	0.048951	0.433566	0.034965	0.573427	0.0909091	-0.265734	-0.013986	-0.0839161	0.230769	0.65149	-0.167832	0.454545	0.223776	-0.776224	0.552448	-0.020979	0.363636	-0.0979021	-0.132867	-0.34965	0.440559	-0.391608	0	-0.0769231	-0.216783	-0.174825	-0.0629371	-0.272727	-0.013986	0.811189	0.048951	0.629371	0.300699	-0.468531
HgA1c	0.0529121	-0.317473	-0.585561	0.144626	0.0634945	0.067022	0.0423297	-0.109352	0.0176374	-0.176374	0.331583	-0.0246923	-0.236341	-0.0705495	0.34922	0.0952418	-0.370385	0.652583	0.0141099	-0.250451	-0.818374	0.225758	0.0564396	-0.296308	-0.0600722	-0.871286	0.229286	-0.215176	-0.589088	0.345692	-0.148154	0.0599671	-0.423297	-0.451517	-0.324528	0.0211648	-0.074077	0.384495	0.151681	-0.338638	-0.183429	0.0176374	0.0141099	-0.0952418	0.222231	0.342165	0.437407	0.215176	-0.264561
FSHmIU.mL	-0.249124	-0.491231	-0.617548	0.49474	-0.389476	-0.0947374	-0.301756	0.235089	-0.473687	-0.105264	0.0771935	-0.459652	-0.470178	-0.343862	0.389476	0.470178	-0.136843	0.459652	0.287721	-0.329827	-0.459652	0.017544	-0.11579	-0.0456143	-0.0123023	-0.449126	-0.0210528	-0.343862	-0.287721	0.375441	-0.421055	0.217545	-0.357897	-0.249124	-0.49474	0.487722	-0.259651	0.29123	-0.168422	-0.284212	-0.312283	0.171931	-0.0491231	0.410529	0.0350879	0.364915	0.108773	0.312283	0.182457
LHmIU.mL	-0.153846	-0.314685	-0.412587	0.657343	-0.461538	-0.13986	-0.0839161	0.167832	-0.552448	-0.20979	0.160839	-0.482517	-0.531469	-0.328671	0.405594	0.447552	0.153846	0.356643	0.475524	-0.132867	-0.27972	-0.0909091	-0.0559441	0.160839	0.136603	-0.230769	0.0839161	-0.125874	-0.118881	0.230769	-0.111888	0.293706	-0.132867	-0.027972	-0.503497	0.545455	-0.48951	0.181818	-0.244755	-0.34965	-0.335664	-0.013986	-0.0909091	0.573427	0.00699301	0.167832	0.0559441	0.230769	0.251748
cholmg.dL	0.154898	0.309796	0.328019	-0.0318907	0.0546698	0.227791	0.132119	0.332575	-0.104784	-0.132119	-0.16401	0.136675	0.0820048	-0.0364466	-0.191344	-0.0683373	0.0911164	-0.410024	-0.0865606	0.651482	0.44647	-0.104784	-0.259682	-0.123007	-0.0525114	0.587701	-0.0911164	0.177677	0.255126	-0.0683373	0.259682	0.0637815	0.624147	0.560366	0.255126	-0.118451	0.10934	-0.0911164	0.173121	0.113896	0.318907	-0.154898	0.546698	0.300684	-0.0637815	0.136675	0.0546698	-0.0774489	-0.0728931
HDLmg.dL	0.0181818	0.581818	0.436364	-0.0727273	0.109091	0.0363636	-0.0545455	0.318182	0.1	-0.227273	-0.0454545	0.354545	0.345455	0.0727273	-0.354545	-0.272727	0.0636364	-0.209091	-0.0454545	0.436364	0.590909	-0.109091	-0.109091	0.00909091	-0.113896	0.527273	-0.309091	0.190909	0.454545	-0.4	0.481818	0.0363636	0.318182	0.272727	0.327273	-0.127273	0.0727273	-0.290909	-0.0636364	0.254545	-0.0363636	-0.218182	0.581818	0.218182	-0.490909	-0.0363636	0.0454545	-0.272727	-0.227273
LDLmg.dL	0.0181818	0.0818182	0.209091	-0.0636364	0.0636364	-0.0272727	-0.0454545	0.2	-0.0909091	-0.172727	-0.372727	0.190909	0.145455	0	-0.0727273	0.0181818	0.00909091	-0.281818	-0.181818	0.372727	0.263636	-0.345455	-0.263636	-0.0545455	-0.154898	0.590909	-0.345455	0.227273	0.218182	0.0727273	-0.0363636	-0.127273	0.427273	0.363636	0.172727	-0.145455	0.118182	0.0636364	0.190909	-0.154545	0.454545	0.109091	0.4	0.2	0.0545455	0.263636	0.118182	0.0181818	0.0363636
triglymg.dL	0.190909	0.218182	0.254545	0.00909091	-0.0636364	0.6	0.163636	0.518182	-0.0727273	0.209091	0.0454545	-0.00909091	0.0727273	-0.145455	-0.154545	0.00909091	0.0818182	-0.518182	0.0454545	0.690909	0.418182	0.318182	-0.427273	-0.154545	0.177677	0.372727	0.309091	-0.0909091	-0.0454545	-0.0181818	0.145455	0.327273	0.618182	0.6	0.118182	0.0454545	0.136364	-0.209091	0.136364	0.527273	0.109091	-0.263636	0.463636	0.209091	0.0909091	0.0363636	-0.0636364	0.0272727	-0.272727
heightcm.	-0.188811	-0.58042	-0.391608	0.496504	-0.223776	-0.384615	-0.405594	-0.146853	-0.51049	0.0629371	0.0769231	-0.391608	0.216783	-0.384615	0.265734	0.587413	0.0699301	0.048951	0.461538	-0.377622	-0.048951	-0.160839	-0.237762	0.538462	0.0490369	0.027972	-0.111888	-0.454545	0.202797	-0.300699	-0.251748	0.517483	-0.517483	-0.447552	-0.671329	0.27972	-0.335664	0.356643	-0.223776	0.111888	-0.41958	0.405594	-0.496504	0.230769	-0.272727	-0.041958	-0.223776	0.524476	0.0839161
weightkg.	0.223776	-0.13986	-0.174825	0.433566	0.041958	-0.51049	-0.118881	-0.286713	-0.629371	-0.307692	-0.0839161	-0.475524	0.167832	0	0.545455	0.195804	0.223776	-0.13986	0.412587	-0.111888	0.0909091	-0.48951	0.111888	0.272727	0.038529	0.223776	-0.447552	-0.0979021	0.0909091	0.0979021	-0.0979021	0.41958	-0.573427	-0.601399	-0.216783	0.188811	-0.160839	0.391608	0.013986	-0.321678	-0.111888	0.552448	-0.230769	0.258741	0.034965	0.363636	0.538462	0.377622	-0.20979
BMI	0.34965	0.0839161	-0.118881	0.034965	0.34965	-0.111888	0.0629371	-0.146853	-0.433566	-0.328671	-0.0979021	-0.244755	-0.00699301	0.041958	0.251748	-0.020979	-0.0629371	-0.251748	-0.013986	0.272727	0.188811	-0.370629	0.167832	-0.251748	-0.238179	0.272727	-0.447552	-0.0909091	0.0909091	0.188811	0.0979021	0.286713	-0.195804	-0.237762	0.272727	-0.118881	0.13986	0.370629	0.335664	-0.335664	0.244755	0.328671	0.300699	0.307692	0.0699301	0.545455	0.657343	0.223776	-0.370629
DXA..Body Fat	0.447552	-0.174825	-0.111888	0.258741	0.125874	-0.237762	0.216783	-0.384615	-0.769231	-0.300699	-0.202797	-0.671329	-0.167832	-0.0699301	0.342657	0.195804	0.27972	-0.531469	0.202797	0.258741	0.146853	-0.433566	0.181818	-0.0839161	-0.0280211	0.27972	-0.188811	-0.153846	0.195804	0.195804	-0.013986	0.342657	-0.0909091	-0.167832	0.0559441	0.013986	0.0559441	0.51049	0.314685	-0.293706	0.328671	0.440559	-0.230769	0.307692	0.0699301	0.426573	0.342657	0.314685	0.0979021
VO2peak(ml.FFM.min)	0.202797	0.41958	0.58042	-0.433566	0.181818	0.426573	0.00699301	0.286713	0.503497	0.552448	0.181818	0.433566	0.335664	0.412587	-0.559441	-0.48951	-0.104895	-0.244755	-0.405594	0.573427	0.328671	0.643357	-0.013986	-0.0629371	-0.224168	0.188811	0.0699301	0.314685	0.41958	-0.475524	0.0559441	-0.335664	0.657343	0.545455	0.34965	-0.272727	0.412587	-0.545455	0.146853	0.706294	0.328671	-0.013986	0.405594	-0.34965	-0.272727	-0.132867	-0.545455	-0.608392	0.426573
p-values
	199203	199777	199802	211972	213961	214535	217893	223505	223513	225427	225548	226851	228147	232087	235972	268365	281268	288808	299159	309642	402237	415114	1,5-anhydroglucitol	2,3,5-trihydroxypyrazine	2,5-furandicarboxylic acid	2-ketoisocaproic acid	5-hydroxymethyl-2-furoic acid	adenosine-5-phosphate	alphaketoglutaric.acid	arginine..ornithine	aspartic acid	AUC_199773	AUC_199777	AUC_199794	AUC_211972	AUC_213961	AUC_226842	AUC_226848	AUC_232946	AUC_235972	AUC_241882	AUC_271416	AUC_281268	AUC_285340	AUC_295002	AUC_299159	AUC_299211	AUC_369638	AUC_4-hydroxybenzoate
199203	NA	0.664633	0.745609	0.556737	0.035806	0.416775	0.0168315	0.0415215	0.762122	0.829024	0.174519	0.512841	0.931234	0.118176	0.696683	0.159106	0.982792	0.319139	0.512841	0.013906	0.498556	0.21702	0.0899137	0.21702	0.571016	0.330589	0.30791	0.617524	0.982792	0.931234	0.456801	0.896986	0.512841	0.829024	0.34226	0.130948	0.208063	0.354148	0.00823977	0.914093	0.0512656	0.330589	0.948402	0.286123	0.484452	0.265239	0.296904	0.602099	0.696683
199777	0.664633	NA	0.000259812	0.456801	0.948402	0.586824	0.586824	0.778725	0.118176	0.541936	0.586824	0.235621	0.403833	0.013906	0.498556	0.000642826	0.255138	0.729195	0.762122	0.680598	0.245265	0.96559	0.255138	0.96559	0.556033	0.571701	0.512841	0.0113742	0.586824	0.896986	0.265239	0.0415215	0.617524	0.845931	0.0415215	0.845931	0.456801	0.00735503	0.512841	0.812183	0.948402	0.470532	0.498556	0.21702	0.571701	0.602099	0.648796	0.00114311	1
199802	0.745609	0.000259812	NA	0.429919	0.745609	0.586824	0.729195	0.696683	0.118176	0.914093	0.245265	0.275567	0.137658	0.0168315	0.391097	0.00395045	0.118176	0.255138	0.778725	0.586824	0.182564	0.982792	0.648796	0.729195	0.359293	0.30791	0.617524	0.0102452	0.429919	0.812183	0.696683	0.0201855	0.296904	0.556737	0.112109	0.879919	0.30791	0.00512408	0.512841	0.354148	0.586824	0.762122	0.948402	0.0625115	0.571701	0.498556	0.712884	0.00190037	0.470532
211972	0.556737	0.456801	0.429919	NA	0.00735503	0.0951573	0.795415	0.845931	0.0260969	0.208063	0.96559	0.035806	0.512841	0.403833	0.00136332	0.118176	0.0415215	0.354148	9.54357e-07	0.159106	0.403833	0.190836	0.602099	0.0385885	0.0207937	0.648796	0.762122	1	0.245265	0.235621	0.664633	0.159106	0.100603	0.199335	0.00258622	0.000642826	0.00450844	0.745609	0.0585895	0.174519	0.0201855	0.914093	0.0666119	0.174519	0.556737	0.982792	0.30791	0.199335	0.812183
213961	0.035806	0.948402	0.745609	0.00735503	NA	0.1667	0.330589	0.112109	0.443262	0.416775	0.1667	0.319139	0.812183	0.484452	0.124455	0.296904	0.0260969	0.602099	0.00395045	0.0446093	0.879919	0.199335	0.1667	0.0585895	0.00199349	0.862898	0.931234	0.680598	0.226206	0.118176	0.265239	1	0.456801	0.795415	0.0512656	4.19104e-05	0.0585895	0.265239	0.000951363	0.617524	0.0331699	0.556737	0.130948	0.556737	0.712884	0.527302	0.948402	0.729195	0.896986
214535	0.416775	0.586824	0.586824	0.0951573	0.1667	NA	0.416775	0.443262	0.354148	0.0625115	0.235621	0.403833	0.778725	0.512841	0.199335	0.879919	0.0708943	0.429919	0.0951573	0.0113742	0.931234	0.0240032	0.366251	0.0708943	0.323944	0.914093	0.0800194	0.275567	0.617524	0.712884	0.696683	0.416775	0.012593	0.013906	0.391097	0.182564	0.30791	0.778725	0.0585895	0.0951573	0.151735	0.391097	0.0666119	0.982792	0.470532	0.862898	0.498556	0.586824	0.403833
217893	0.0168315	0.586824	0.729195	0.795415	0.330589	0.416775	NA	0.0260969	0.862898	0.416775	0.416775	0.556737	0.106252	0.696683	0.812183	0.484452	0.319139	0.391097	0.931234	0.106252	0.571701	0.982792	0.130948	0.319139	0.533867	0.512841	0.0102452	0.456801	0.556737	0.648796	0.0260969	0.96559	0.144586	0.330589	0.34226	0.296904	0.896986	0.498556	0.151735	0.296904	0.199335	0.182564	0.443262	0.812183	0.199335	0.617524	0.484452	0.812183	0.96559
223505	0.0415215	0.778725	0.696683	0.845931	0.112109	0.443262	0.0260969	NA	0.443262	0.391097	0.391097	0.354148	0.30791	0.633091	0.812183	0.729195	0.664633	0.795415	0.829024	0.795415	0.498556	0.648796	0.00823977	0.762122	0.616899	0.443262	0.456801	0.812183	0.512841	0.571701	0.137658	0.982792	0.712884	0.403833	0.664633	0.137658	0.982792	0.106252	0.174519	0.1667	0.403833	0.762122	0.112109	0.795415	0.896986	0.762122	0.696683	0.96559	0.403833
223513	0.762122	0.118176	0.118176	0.0260969	0.443262	0.354148	0.862898	0.443262	NA	0.21702	0.729195	5.99786e-05	0.151735	0.100603	0.106252	0.0306759	0.330589	0.443262	0.0666119	0.745609	0.914093	0.112109	0.982792	0.812183	0.609158	0.879919	0.948402	0.106252	0.96559	0.429919	0.896986	0.0306759	0.296904	0.429919	0.265239	0.21702	0.296904	0.0415215	0.96559	0.245265	0.633091	0.484452	0.151735	0.0306759	0.96559	0.391097	0.512841	0.0331699	0.948402
225427	0.829024	0.541936	0.914093	0.208063	0.416775	0.0625115	0.416775	0.391097	0.21702	NA	0.144586	0.443262	0.403833	0.712884	0.34226	0.914093	0.159106	0.896986	0.265239	0.456801	0.443262	0.00512408	0.745609	0.745609	0.269479	0.648796	0.778725	0.745609	0.762122	0.174519	0.354148	0.729195	0.470532	0.429919	0.948402	0.633091	0.443262	0.391097	0.664633	0.00512408	0.762122	0.416775	0.416775	0.571701	0.664633	0.586824	0.100603	0.896986	0.556737
225548	0.174519	0.586824	0.245265	0.96559	0.1667	0.235621	0.416775	0.391097	0.729195	0.144586	NA	0.812183	0.602099	0.829024	0.812183	1	0.296904	0.159106	0.931234	0.391097	0.512841	0.0331699	0.275567	0.729195	0.341372	0.265239	0.208063	0.931234	0.914093	0.144586	0.286123	0.199335	0.948402	0.914093	0.556737	0.556737	0.456801	0.729195	0.429919	0.745609	0.617524	0.982792	0.648796	0.712884	0.571701	0.602099	0.982792	0.812183	0.896986
226851	0.512841	0.235621	0.275567	0.035806	0.319139	0.403833	0.556737	0.354148	5.99786e-05	0.443262	0.812183	NA	0.0848688	0.354148	0.0585895	0.144586	0.130948	0.391097	0.0512656	0.617524	0.829024	0.286123	0.617524	0.778725	0.290588	0.829024	0.541936	0.286123	0.633091	0.21702	0.729195	0.118176	0.296904	0.378569	0.366251	0.124455	0.391097	0.190836	0.812183	0.354148	0.617524	0.484452	0.0283197	0.174519	0.571701	0.617524	0.556737	0.144586	0.617524
228147	0.931234	0.403833	0.137658	0.512841	0.812183	0.778725	0.106252	0.30791	0.151735	0.403833	0.602099	0.0848688	NA	0.159106	0.664633	0.226206	0.648796	0.812183	0.617524	0.795415	0.745609	0.443262	0.255138	0.556737	0.803451	0.664633	0.137658	0.527302	0.571701	0.403833	0.21702	0.416775	0.812183	0.484452	0.931234	0.696683	0.190836	0.319139	0.96559	0.0585895	0.795415	0.137658	0.429919	0.0415215	0.378569	0.484452	0.914093	0.391097	0.778725
232087	0.118176	0.013906	0.0168315	0.403833	0.484452	0.512841	0.696683	0.633091	0.100603	0.712884	0.829024	0.354148	0.159106	NA	0.914093	1.86219e-05	0.617524	0.829024	0.498556	0.648796	0.845931	0.286123	0.0848688	0.982792	0.974145	0.556737	0.443262	0.00258622	0.879919	1	0.745609	0.013906	0.879919	0.330589	0.265239	0.571701	0.151735	0.100603	0.795415	0.712884	0.443262	0.226206	0.845931	0.00450844	0.845931	0.648796	0.443262	0.000951363	0.286123
235972	0.696683	0.498556	0.391097	0.00136332	0.124455	0.199335	0.812183	0.812183	0.106252	0.34226	0.812183	0.0585895	0.664633	0.914093	NA	0.456801	0.118176	0.330589	0.00299286	0.30791	0.124455	0.378569	0.982792	0.199335	0.0410748	0.319139	0.778725	0.617524	0.0184527	0.0260969	0.34226	0.319139	0.0585895	0.0512656	0.0220342	0.0168315	0.0800194	0.541936	0.391097	0.0848688	0.21702	0.403833	0.112109	0.696683	0.0415215	0.416775	0.0113742	0.245265	0.541936
268365	0.159106	0.000642826	0.00395045	0.118176	0.296904	0.879919	0.484452	0.729195	0.0306759	0.914093	1	0.144586	0.226206	1.86219e-05	0.456801	NA	0.812183	0.896986	0.199335	0.403833	0.862898	0.296904	0.100603	0.498556	0.803451	0.680598	0.586824	0.00920178	0.680598	0.829024	0.696683	0.00512408	0.633091	0.795415	0.035806	0.255138	0.0625115	0.0666119	0.633091	0.586824	0.296904	0.745609	0.456801	0.00654349	0.795415	0.829024	0.617524	5.99786e-05	0.512841
281268	0.982792	0.255138	0.118176	0.0415215	0.0260969	0.0708943	0.319139	0.664633	0.330589	0.159106	0.296904	0.130948	0.648796	0.617524	0.118176	0.812183	NA	0.498556	0.00735503	0.429919	0.664633	0.0848688	0.648796	0.0899137	0.000497798	0.556737	0.586824	0.112109	0.617524	0.255138	0.664633	0.778725	0.795415	0.795415	0.602099	0.0446093	0.144586	0.296904	0.0666119	0.319139	0.34226	0.541936	0.0113742	0.948402	0.512841	0.286123	0.633091	0.633091	0.633091
288808	0.319139	0.729195	0.255138	0.354148	0.602099	0.429919	0.391097	0.795415	0.443262	0.896986	0.159106	0.391097	0.812183	0.829024	0.330589	0.896986	0.498556	NA	0.556737	0.0899137	0.0848688	0.680598	0.729195	0.30791	0.922525	0.0848688	0.745609	0.512841	0.34226	0.982792	0.762122	0.795415	0.0951573	0.159106	0.100603	0.429919	0.137658	0.812183	0.275567	0.245265	0.0585895	0.931234	0.829024	0.879919	0.762122	0.829024	0.512841	0.879919	0.879919
299159	0.512841	0.762122	0.778725	9.54357e-07	0.00395045	0.0951573	0.931234	0.829024	0.0666119	0.265239	0.931234	0.0512656	0.617524	0.498556	0.00299286	0.199335	0.00735503	0.556737	NA	0.130948	0.762122	0.144586	0.648796	0.012593	0.00232868	0.982792	0.648796	0.795415	0.226206	0.265239	0.879919	0.182564	0.130948	0.275567	0.012593	0.000259812	0.00258622	0.845931	0.0184527	0.265239	0.00920178	0.812183	0.0331699	0.235621	0.443262	0.571701	0.366251	0.275567	0.633091
309642	0.013906	0.680598	0.586824	0.159106	0.0446093	0.0113742	0.106252	0.795415	0.745609	0.456801	0.391097	0.617524	0.795415	0.648796	0.30791	0.403833	0.429919	0.0899137	0.130948	NA	0.795415	0.124455	0.96559	0.0708943	0.290588	0.845931	0.30791	0.931234	0.586824	0.527302	0.354148	0.729195	0.00512408	0.0585895	0.159106	0.0512656	0.118176	0.602099	0.00395045	0.245265	0.00735503	0.96559	0.112109	0.664633	0.914093	0.354148	0.96559	0.778725	0.896986
402237	0.498556	0.245265	0.182564	0.403833	0.879919	0.931234	0.571701	0.498556	0.914093	0.443262	0.512841	0.829024	0.745609	0.845931	0.124455	0.862898	0.664633	0.0848688	0.762122	0.795415	NA	0.512841	0.914093	0.527302	0.761715	4.19104e-05	0.30791	0.982792	0.0512656	0.174519	0.366251	0.795415	0.484452	0.21702	0.100603	0.948402	0.879919	0.137658	0.429919	0.245265	0.845931	0.602099	0.556737	0.330589	0.366251	0.144586	0.199335	0.664633	0.931234
415114	0.21702	0.96559	0.982792	0.190836	0.199335	0.0240032	0.982792	0.648796	0.112109	0.00512408	0.0331699	0.286123	0.443262	0.286123	0.378569	0.296904	0.0848688	0.680598	0.144586	0.124455	0.512841	NA	0.948402	0.443262	0.220708	0.190836	0.34226	0.96559	0.931234	0.286123	0.633091	0.829024	0.34226	0.602099	0.829024	0.296904	0.1667	0.602099	0.199335	0.0168315	0.456801	0.541936	0.21702	0.151735	0.948402	0.712884	0.378569	0.391097	0.556737
1,5-anhydroglucitol	0.0899137	0.255138	0.648796	0.602099	0.1667	0.366251	0.130948	0.00823977	0.982792	0.745609	0.275567	0.617524	0.255138	0.0848688	0.982792	0.100603	0.648796	0.729195	0.648796	0.96559	0.914093	0.948402	NA	0.862898	0.490702	0.602099	0.931234	0.199335	0.403833	0.571701	0.159106	0.378569	0.541936	0.354148	0.174519	0.354148	0.829024	0.896986	0.633091	0.275567	0.795415	0.778725	0.512841	0.745609	0.982792	0.586824	0.648796	0.118176	0.208063
2,3,5-trihydroxypyrazine	0.21702	0.96559	0.729195	0.0385885	0.0585895	0.0708943	0.319139	0.762122	0.812183	0.745609	0.729195	0.778725	0.556737	0.982792	0.199335	0.498556	0.0899137	0.30791	0.012593	0.0708943	0.527302	0.443262	0.862898	NA	0.123706	0.354148	0.664633	0.30791	0.948402	0.571701	0.795415	0.602099	0.190836	0.391097	0.0385885	0.0306759	0.0102452	0.21702	0.00450844	0.862898	0.00920178	0.879919	0.124455	0.571701	0.795415	0.0753623	0.680598	0.862898	0.745609
2,5-furandicarboxylic acid	0.571016	0.556033	0.359293	0.0207937	0.00199349	0.323944	0.533867	0.616899	0.609158	0.269479	0.341372	0.290588	0.803451	0.974145	0.0410748	0.803451	0.000497798	0.922525	0.00232868	0.290588	0.761715	0.220708	0.490702	0.123706	NA	0.974145	0.259267	0.285226	0.0490489	0.0507653	0.879709	0.956919	0.753434	0.86266	0.202808	0.00640178	0.0793962	0.301483	0.0353946	0.455989	0.158294	0.301483	0.0381595	0.931114	0.169753	0.38394	0.435736	0.845664	0.593787
2-ketoisocaproic acid	0.330589	0.571701	0.30791	0.648796	0.862898	0.914093	0.512841	0.443262	0.879919	0.648796	0.265239	0.829024	0.664633	0.556737	0.319139	0.680598	0.556737	0.0848688	0.982792	0.845931	4.19104e-05	0.190836	0.602099	0.354148	0.974145	NA	0.245265	0.96559	0.124455	0.391097	0.617524	0.664633	0.429919	0.182564	0.330589	0.896986	0.812183	0.34226	0.443262	0.541936	0.982792	0.696683	0.664633	0.235621	0.696683	0.235621	0.34226	0.862898	0.795415
5-hydroxymethyl-2-furoic acid	0.30791	0.512841	0.617524	0.762122	0.931234	0.0800194	0.0102452	0.456801	0.948402	0.778725	0.208063	0.541936	0.137658	0.443262	0.778725	0.586824	0.586824	0.745609	0.648796	0.30791	0.30791	0.34226	0.931234	0.664633	0.259267	0.245265	NA	0.729195	0.159106	0.712884	0.255138	0.378569	0.137658	0.159106	0.648796	0.931234	0.456801	0.617524	0.512841	0.931234	0.812183	0.0800194	0.330589	1	0.1667	0.330589	0.712884	0.484452	0.795415
adenosine-5-phosphate	0.617524	0.0113742	0.0102452	1	0.680598	0.275567	0.456801	0.812183	0.106252	0.745609	0.931234	0.286123	0.527302	0.00258622	0.617524	0.00920178	0.112109	0.512841	0.795415	0.931234	0.982792	0.96559	0.199335	0.30791	0.285226	0.96559	0.729195	NA	0.812183	0.712884	0.778725	0.0184527	0.812183	0.829024	0.633091	0.795415	0.862898	0.0306759	0.416775	0.512841	0.948402	0.896986	0.795415	0.112109	0.429919	0.498556	0.484452	0.00580115	0.391097
alphaketoglutaric.acid	0.982792	0.586824	0.429919	0.245265	0.226206	0.617524	0.556737	0.512841	0.96559	0.762122	0.914093	0.633091	0.571701	0.879919	0.0184527	0.680598	0.617524	0.34226	0.226206	0.586824	0.0512656	0.931234	0.403833	0.948402	0.0490489	0.124455	0.159106	0.812183	NA	0.00222314	0.354148	0.712884	0.633091	0.648796	0.199335	0.144586	0.378569	0.879919	0.712884	0.354148	0.571701	0.633091	0.586824	0.729195	0.00222314	0.602099	0.0512656	0.330589	0.137658
arginine..ornithine	0.931234	0.896986	0.812183	0.235621	0.118176	0.712884	0.648796	0.571701	0.429919	0.174519	0.144586	0.21702	0.403833	1	0.0260969	0.829024	0.255138	0.982792	0.265239	0.527302	0.174519	0.286123	0.571701	0.571701	0.0507653	0.391097	0.712884	0.712884	0.00222314	NA	0.199335	0.762122	0.633091	0.586824	0.602099	0.112109	0.795415	0.762122	0.712884	0.118176	0.931234	0.982792	0.470532	0.862898	0.035806	0.199335	0.0260969	0.571701	0.484452
aspartic acid	0.456801	0.265239	0.696683	0.664633	0.265239	0.696683	0.0260969	0.137658	0.896986	0.354148	0.286123	0.729195	0.21702	0.745609	0.34226	0.696683	0.664633	0.762122	0.879919	0.354148	0.366251	0.633091	0.159106	0.795415	0.879709	0.617524	0.255138	0.778725	0.354148	0.199335	NA	0.633091	0.319139	0.255138	0.199335	0.255138	0.429919	0.982792	0.712884	0.470532	0.948402	0.0168315	0.862898	0.330589	0.648796	0.0951573	0.896986	0.745609	0.498556
AUC_199773	0.896986	0.0415215	0.0201855	0.159106	1	0.416775	0.96559	0.982792	0.0306759	0.729195	0.199335	0.118176	0.416775	0.013906	0.319139	0.00512408	0.778725	0.795415	0.182564	0.729195	0.795415	0.829024	0.378569	0.602099	0.956919	0.664633	0.378569	0.0184527	0.712884	0.762122	0.633091	NA	0.664633	0.931234	0.1667	0.470532	0.124455	0.100603	0.845931	0.982792	0.34226	0.914093	0.845931	0.0102452	0.617524	1	0.795415	0.000418118	0.124455
AUC_199777	0.512841	0.617524	0.296904	0.100603	0.456801	0.012593	0.144586	0.712884	0.296904	0.470532	0.948402	0.296904	0.812183	0.879919	0.0585895	0.633091	0.795415	0.0951573	0.130948	0.00512408	0.484452	0.34226	0.541936	0.190836	0.753434	0.429919	0.137658	0.812183	0.633091	0.633091	0.319139	0.664633	NA	1.17022e-05	0.151735	0.151735	0.34226	0.712884	0.174519	0.265239	0.0306759	0.144586	0.265239	0.745609	0.896986	0.633091	0.190836	0.556737	0.745609
AUC_199794	0.829024	0.845931	0.556737	0.199335	0.795415	0.013906	0.330589	0.403833	0.429919	0.429919	0.914093	0.378569	0.484452	0.330589	0.0512656	0.795415	0.795415	0.159106	0.275567	0.0585895	0.21702	0.602099	0.354148	0.391097	0.86266	0.182564	0.159106	0.829024	0.648796	0.586824	0.255138	0.931234	1.17022e-05	NA	0.245265	0.403833	0.812183	0.602099	0.541936	0.319139	0.226206	0.0331699	0.265239	0.571701	0.914093	0.275567	0.0951573	0.948402	0.982792
AUC_211972	0.34226	0.0415215	0.112109	0.00258622	0.0512656	0.391097	0.34226	0.664633	0.265239	0.948402	0.556737	0.366251	0.931234	0.265239	0.0220342	0.035806	0.602099	0.100603	0.012593	0.159106	0.100603	0.829024	0.174519	0.0385885	0.202808	0.330589	0.648796	0.633091	0.199335	0.602099	0.199335	0.1667	0.151735	0.245265	NA	0.0306759	0.0220342	0.470532	0.208063	0.586824	0.0585895	0.586824	0.1667	0.498556	0.512841	0.948402	0.812183	0.0800194	0.914093
AUC_213961	0.130948	0.845931	0.879919	0.000642826	4.19104e-05	0.182564	0.296904	0.137658	0.21702	0.633091	0.556737	0.124455	0.696683	0.571701	0.0168315	0.255138	0.0446093	0.429919	0.000259812	0.0512656	0.948402	0.296904	0.354148	0.0306759	0.00640178	0.896986	0.931234	0.795415	0.144586	0.112109	0.255138	0.470532	0.151735	0.403833	0.0306759	NA	0.0260969	0.34226	0.00161477	0.556737	0.00654349	0.931234	0.182564	0.296904	0.429919	0.729195	0.571701	0.484452	0.812183
AUC_226842	0.208063	0.456801	0.30791	0.00450844	0.0585895	0.30791	0.896986	0.982792	0.296904	0.443262	0.456801	0.391097	0.190836	0.151735	0.0800194	0.0625115	0.144586	0.137658	0.00258622	0.118176	0.879919	0.1667	0.829024	0.0102452	0.0793962	0.812183	0.456801	0.862898	0.378569	0.795415	0.429919	0.124455	0.34226	0.812183	0.0220342	0.0260969	NA	0.982792	0.0306759	0.100603	0.00512408	0.190836	0.174519	0.0331699	0.366251	0.0899137	0.762122	0.174519	0.512841
AUC_226848	0.354148	0.00735503	0.00512408	0.745609	0.265239	0.778725	0.498556	0.106252	0.0415215	0.391097	0.729195	0.190836	0.319139	0.100603	0.541936	0.0666119	0.296904	0.812183	0.845931	0.602099	0.137658	0.602099	0.896986	0.21702	0.301483	0.34226	0.617524	0.0306759	0.879919	0.762122	0.982792	0.100603	0.712884	0.602099	0.470532	0.34226	0.982792	NA	0.0385885	0.245265	0.319139	0.470532	0.712884	0.34226	0.879919	0.124455	0.456801	0.013906	0.696683
AUC_232946	0.00823977	0.512841	0.512841	0.0585895	0.000951363	0.0585895	0.151735	0.174519	0.96559	0.664633	0.429919	0.812183	0.96559	0.795415	0.391097	0.633091	0.0666119	0.275567	0.0184527	0.00395045	0.429919	0.199335	0.633091	0.00450844	0.0353946	0.443262	0.512841	0.416775	0.712884	0.712884	0.712884	0.845931	0.174519	0.541936	0.208063	0.00161477	0.0306759	0.0385885	NA	0.712884	0.000521134	0.443262	0.265239	0.470532	0.879919	0.0899137	0.729195	0.795415	0.982792
AUC_235972	0.914093	0.812183	0.354148	0.174519	0.617524	0.0951573	0.296904	0.1667	0.245265	0.00512408	0.745609	0.354148	0.0585895	0.712884	0.0848688	0.586824	0.319139	0.245265	0.265239	0.245265	0.245265	0.0168315	0.275567	0.862898	0.455989	0.541936	0.931234	0.512841	0.354148	0.118176	0.470532	0.982792	0.265239	0.319139	0.586824	0.556737	0.100603	0.245265	0.712884	NA	0.633091	0.571701	0.319139	0.286123	0.319139	0.896986	0.0446093	0.571701	0.745609
AUC_241882	0.0512656	0.948402	0.586824	0.0201855	0.0331699	0.151735	0.199335	0.403833	0.633091	0.762122	0.617524	0.617524	0.795415	0.443262	0.21702	0.296904	0.34226	0.0585895	0.00920178	0.00735503	0.845931	0.456801	0.795415	0.00920178	0.158294	0.982792	0.812183	0.948402	0.571701	0.931234	0.948402	0.34226	0.0306759	0.226206	0.0585895	0.00654349	0.00512408	0.319139	0.000521134	0.633091	NA	0.512841	0.354148	0.190836	0.862898	0.159106	0.96559	0.571701	0.484452
AUC_271416	0.330589	0.470532	0.762122	0.914093	0.556737	0.391097	0.182564	0.762122	0.484452	0.416775	0.982792	0.484452	0.137658	0.226206	0.403833	0.745609	0.541936	0.931234	0.812183	0.96559	0.602099	0.541936	0.778725	0.879919	0.301483	0.696683	0.0800194	0.896986	0.633091	0.982792	0.0168315	0.914093	0.144586	0.0331699	0.586824	0.931234	0.190836	0.470532	0.443262	0.571701	0.512841	NA	0.879919	0.330589	0.829024	0.0306759	0.586824	0.982792	0.275567
AUC_281268	0.948402	0.498556	0.948402	0.0666119	0.130948	0.0666119	0.443262	0.112109	0.151735	0.416775	0.648796	0.0283197	0.429919	0.845931	0.112109	0.456801	0.0113742	0.829024	0.0331699	0.112109	0.556737	0.21702	0.512841	0.124455	0.0381595	0.664633	0.330589	0.795415	0.586824	0.470532	0.862898	0.845931	0.265239	0.265239	0.1667	0.182564	0.174519	0.712884	0.265239	0.319139	0.354148	0.879919	NA	0.931234	0.527302	0.30791	0.914093	0.617524	0.30791
AUC_285340	0.286123	0.21702	0.0625115	0.174519	0.556737	0.982792	0.812183	0.795415	0.0306759	0.571701	0.712884	0.174519	0.0415215	0.00450844	0.696683	0.00654349	0.948402	0.879919	0.235621	0.664633	0.330589	0.151735	0.745609	0.571701	0.931114	0.235621	1	0.112109	0.729195	0.862898	0.330589	0.0102452	0.745609	0.571701	0.498556	0.296904	0.0331699	0.34226	0.470532	0.286123	0.190836	0.330589	0.931234	NA	0.914093	0.556737	0.931234	0.0331699	0.429919
AUC_295002	0.484452	0.571701	0.571701	0.556737	0.712884	0.470532	0.199335	0.896986	0.96559	0.664633	0.571701	0.571701	0.378569	0.845931	0.0415215	0.795415	0.512841	0.762122	0.443262	0.914093	0.366251	0.948402	0.982792	0.795415	0.169753	0.696683	0.1667	0.429919	0.00222314	0.035806	0.648796	0.617524	0.896986	0.914093	0.512841	0.429919	0.366251	0.879919	0.879919	0.319139	0.862898	0.829024	0.527302	0.914093	NA	0.948402	0.112109	0.391097	0.403833
AUC_299159	0.265239	0.602099	0.498556	0.982792	0.527302	0.862898	0.617524	0.762122	0.391097	0.586824	0.602099	0.617524	0.484452	0.648796	0.416775	0.829024	0.286123	0.829024	0.571701	0.354148	0.144586	0.712884	0.586824	0.0753623	0.38394	0.235621	0.330589	0.498556	0.602099	0.199335	0.0951573	1	0.633091	0.275567	0.948402	0.729195	0.0899137	0.124455	0.0899137	0.896986	0.159106	0.0306759	0.30791	0.556737	0.948402	NA	0.0800194	0.696683	0.812183
AUC_299211	0.296904	0.648796	0.712884	0.30791	0.948402	0.498556	0.484452	0.696683	0.512841	0.100603	0.982792	0.556737	0.914093	0.443262	0.0113742	0.617524	0.633091	0.512841	0.366251	0.96559	0.199335	0.378569	0.648796	0.680598	0.435736	0.34226	0.712884	0.484452	0.0512656	0.0260969	0.896986	0.795415	0.190836	0.0951573	0.812183	0.571701	0.762122	0.456801	0.729195	0.0446093	0.96559	0.586824	0.914093	0.931234	0.112109	0.0800194	NA	0.664633	0.0899137
AUC_369638	0.602099	0.00114311	0.00190037	0.199335	0.729195	0.586824	0.812183	0.96559	0.0331699	0.896986	0.812183	0.144586	0.391097	0.000951363	0.245265	5.99786e-05	0.633091	0.879919	0.275567	0.778725	0.664633	0.391097	0.118176	0.862898	0.845664	0.862898	0.484452	0.00580115	0.330589	0.571701	0.745609	0.000418118	0.556737	0.948402	0.0800194	0.484452	0.174519	0.013906	0.795415	0.571701	0.571701	0.982792	0.617524	0.0331699	0.391097	0.696683	0.664633	NA	0.112109
AUC_4-hydroxybenzoate	0.696683	1	0.470532	0.812183	0.896986	0.403833	0.96559	0.403833	0.948402	0.556737	0.896986	0.617524	0.778725	0.286123	0.541936	0.512841	0.633091	0.879919	0.633091	0.896986	0.931234	0.556737	0.208063	0.745609	0.593787	0.795415	0.795415	0.391097	0.137658	0.484452	0.498556	0.124455	0.745609	0.982792	0.914093	0.812183	0.512841	0.696683	0.982792	0.745609	0.484452	0.275567	0.30791	0.429919	0.403833	0.812183	0.0899137	0.112109	NA
AUC_alphaketoglutaric.acid	0.829024	0.948402	0.712884	0.729195	0.296904	0.470532	0.275567	0.0153173	0.982792	0.914093	0.199335	0.948402	0.159106	0.931234	0.602099	0.982792	0.829024	0.556737	0.896986	0.498556	0.470532	0.541936	0.0102452	0.429919	0.519302	0.664633	0.778725	0.696683	0.245265	0.118176	0.0240032	0.862898	0.664633	0.879919	0.586824	0.391097	0.255138	0.862898	0.862898	0.255138	0.556737	0.403833	0.366251	0.391097	0.914093	0.0220342	0.556737	0.829024	0.586824
AUC_arachidic acid	0.541936	0.0800194	0.208063	0.30791	0.982792	0.571701	0.470532	0.182564	0.00823977	0.118176	0.527302	0.0800194	0.30791	0.182564	0.498556	0.106252	0.729195	0.429919	0.633091	0.617524	0.330589	0.190836	0.812183	0.586824	0.86266	0.795415	0.795415	0.286123	0.664633	0.617524	0.96559	0.378569	0.862898	0.96559	0.403833	0.829024	0.778725	0.00258622	0.255138	0.1667	0.296904	0.556737	0.330589	0.30791	0.778725	0.21702	0.795415	0.137658	0.470532
AUC_arginine..ornithine	0.286123	0.762122	0.812183	0.778725	0.586824	0.275567	0.96559	0.190836	0.0625115	0.633091	0.633091	0.174519	0.914093	0.862898	0.845931	0.879919	0.617524	0.151735	0.982792	0.456801	0.541936	0.512841	0.443262	0.96559	0.37151	0.443262	0.319139	0.795415	0.0153173	0.366251	0.982792	0.862898	0.982792	0.729195	0.829024	0.586824	0.527302	0.275567	0.403833	0.96559	0.286123	0.0899137	0.527302	0.696683	0.144586	0.391097	0.602099	0.914093	0.0548421
AUC_aspartic acid	0.378569	0.96559	0.948402	0.862898	0.617524	0.812183	0.012593	0.0625115	0.378569	0.633091	0.429919	0.403833	0.047856	0.456801	0.696683	0.617524	0.245265	0.330589	0.712884	0.34226	0.330589	0.443262	0.199335	0.762122	0.828728	0.319139	0.124455	0.845931	0.330589	0.366251	0.00344645	0.391097	0.174519	0.124455	0.571701	0.571701	0.226206	0.633091	0.712884	0.391097	0.745609	0.112109	0.366251	0.151735	0.829024	0.0708943	0.484452	0.795415	0.617524
AUC_behenic acid	0.914093	0.812183	0.602099	0.762122	0.982792	0.0113742	0.729195	0.0512656	0.403833	0.137658	0.366251	0.586824	0.602099	0.795415	0.879919	0.948402	0.226206	0.829024	0.812183	0.403833	0.617524	0.0385885	0.124455	0.403833	0.86266	0.403833	0.286123	0.366251	0.0625115	0.541936	0.470532	0.378569	0.648796	0.586824	0.812183	0.729195	0.617524	0.680598	0.712884	0.100603	0.845931	0.762122	0.159106	0.712884	0.34226	0.498556	0.696683	0.527302	0.0753623
AUC_cystine	0.0306759	0.762122	0.648796	0.541936	0.144586	0.275567	0.208063	0.34226	0.762122	0.680598	0.208063	0.330589	0.456801	0.512841	0.812183	0.391097	0.586824	0.664633	0.602099	0.391097	0.696683	0.199335	0.144586	0.100603	0.640335	0.182564	0.319139	0.484452	0.484452	0.729195	0.586824	0.571701	0.712884	0.527302	0.255138	0.498556	0.275567	0.617524	0.174519	0.712884	0.664633	0.762122	0.896986	0.680598	0.586824	0.456801	0.319139	0.96559	0.541936
AUC_fumaric acid	0.354148	0.498556	0.354148	0.208063	0.330589	0.896986	0.680598	0.696683	0.330589	0.245265	0.617524	0.556737	0.527302	0.0331699	0.245265	0.0625115	0.443262	0.795415	0.106252	0.602099	0.812183	0.0585895	0.159106	0.617524	0.102705	0.429919	0.429919	0.354148	0.124455	0.255138	0.456801	0.047856	0.795415	0.745609	0.403833	0.275567	0.0585895	0.484452	0.456801	0.275567	0.286123	0.112109	0.648796	0.100603	0.226206	0.571701	0.255138	0.012593	0.00161477
AUC_gamma-tocopherol	0.000521134	0.0625115	0.144586	0.319139	0.0666119	0.391097	0.035806	0.330589	0.602099	0.914093	0.416775	0.729195	0.778725	0.0306759	0.829024	0.012593	0.879919	0.330589	0.330589	0.00299286	1	0.296904	0.144586	0.174519	0.624676	0.745609	0.664633	0.1667	0.745609	0.896986	0.235621	0.512841	0.182564	0.648796	0.0666119	0.130948	0.144586	0.862898	0.047856	0.845931	0.047856	0.795415	0.330589	0.255138	0.778725	0.34226	0.275567	0.118176	0.896986
AUC_glutamineminor	0.296904	0.0800194	0.0385885	0.144586	0.456801	0.696683	0.571701	0.680598	0.151735	0.118176	0.498556	0.586824	0.795415	0.0306759	0.130948	0.0184527	0.778725	0.556737	0.255138	0.443262	0.296904	0.0753623	0.0753623	0.96559	0.609158	0.879919	0.795415	0.159106	0.182564	0.174519	0.633091	0.100603	0.30791	0.512841	0.0951573	0.403833	0.199335	0.0446093	0.896986	0.106252	0.527302	0.896986	0.982792	0.144586	0.541936	0.286123	0.112109	0.00299286	0.0306759
AUC_glycine	0.0848688	0.762122	0.527302	0.30791	0.443262	0.879919	0.456801	0.378569	0.0240032	0.879919	0.265239	0.0708943	0.762122	0.648796	0.34226	0.512841	0.680598	0.275567	0.30791	0.21702	0.456801	0.812183	0.617524	0.862898	0.879709	0.541936	0.845931	0.34226	0.602099	0.617524	0.319139	0.00735503	0.696683	0.680598	0.914093	0.896986	0.648796	0.245265	0.443262	1	0.914093	0.498556	0.896986	0.144586	1	0.541936	0.354148	0.199335	0.416775
AUC_histidine	0.617524	0.633091	0.602099	0.602099	0.931234	0.137658	0.106252	0.00920178	0.429919	0.0512656	0.896986	0.512841	0.429919	0.879919	0.812183	0.931234	0.124455	0.680598	0.512841	0.778725	0.982792	0.159106	0.159106	0.664633	0.601454	0.931234	0.498556	0.712884	0.21702	0.391097	0.0260969	0.845931	0.96559	0.845931	0.862898	0.586824	0.429919	0.556737	0.896986	0.226206	0.862898	0.34226	0.0625115	0.829024	0.265239	0.21702	0.680598	0.712884	0.456801
AUC_isolinoleic acid	0.330589	0.633091	0.896986	0.00823977	0.00654349	0.34226	0.527302	0.208063	0.190836	0.378569	0.190836	0.330589	0.602099	0.416775	0.035806	0.174519	0.0585895	0.762122	0.00654349	0.556737	0.948402	0.112109	0.035806	0.0951573	0.0130122	0.403833	0.879919	0.829024	0.255138	0.124455	0.275567	0.366251	0.729195	0.879919	0.0385885	0.00920178	0.112109	0.948402	0.137658	0.586824	0.354148	0.896986	0.34226	0.470532	0.391097	0.745609	0.416775	0.199335	0.484452
AUC_lactic acid	0.456801	0.829024	0.235621	0.982792	0.378569	0.712884	0.137658	0.151735	0.648796	0.778725	0.013906	0.778725	0.0625115	0.879919	0.829024	0.812183	0.512841	0.0240032	0.795415	0.982792	0.0899137	0.391097	0.0753623	0.680598	0.556033	0.0306759	0.174519	0.680598	0.571701	0.762122	0.144586	0.96559	0.879919	0.845931	0.829024	0.512841	0.366251	0.556737	0.586824	0.159106	0.712884	0.319139	0.96559	0.778725	0.586824	0.586824	0.680598	0.762122	0.829024
AUC_levoglucosan	0.456801	0.633091	1	0.30791	0.443262	0.664633	0.0951573	0.896986	0.745609	0.896986	0.354148	0.226206	0.0585895	0.712884	0.0899137	0.862898	0.137658	0.778725	0.182564	1	0.914093	0.948402	0.319139	0.664633	0.0842288	0.778725	0.106252	0.30791	0.0415215	0.112109	0.571701	0.617524	0.931234	0.778725	0.931234	0.159106	0.182564	0.456801	0.527302	0.34226	0.498556	0.330589	0.443262	0.571701	0.00450844	0.429919	0.245265	0.96559	0.696683
AUC_N-methylalanine	0.245265	0.0666119	0.0512656	0.0220342	0.182564	0.829024	0.265239	0.255138	0.0446093	0.812183	0.96559	0.226206	0.648796	0.0283197	0.0708943	0.00258622	0.896986	0.633091	0.047856	0.512841	0.948402	0.235621	0.0899137	0.226206	0.526563	0.429919	0.712884	0.199335	0.391097	0.443262	0.470532	0.00580115	0.34226	0.778725	0.0283197	0.0446093	0.035806	0.319139	0.366251	0.443262	0.159106	0.829024	0.982792	0.00735503	0.429919	0.648796	0.416775	0.00258622	0.174519
AUC_oleamide	0.812183	0.112109	0.0585895	0.96559	0.30791	0.556737	0.845931	0.571701	0.541936	0.845931	0.255138	0.664633	0.416775	0.0625115	0.680598	0.0753623	0.199335	0.541936	0.729195	0.498556	0.948402	0.664633	0.729195	0.982792	0.147339	0.602099	0.931234	0.30791	0.403833	0.21702	0.235621	0.112109	0.586824	0.391097	0.541936	0.34226	0.255138	0.0666119	0.366251	0.366251	0.845931	0.571701	0.366251	0.0385885	0.812183	0.862898	0.795415	0.106252	0.602099
AUC_oxoproline	0.456801	0.151735	0.208063	0.378569	0.914093	0.30791	0.633091	0.680598	0.190836	0.124455	0.0708943	0.245265	0.812183	0.498556	0.745609	0.255138	0.484452	0.982792	0.648796	0.296904	0.862898	0.0899137	0.680598	0.795415	0.442438	0.696683	0.586824	0.182564	0.633091	0.354148	0.586824	0.0548421	0.896986	0.862898	0.226206	0.633091	0.829024	0.484452	0.586824	0.199335	0.812183	0.275567	0.762122	0.30791	0.712884	0.484452	0.429919	0.354148	0.456801
AUC_palmitoleic acid	0.762122	0.208063	0.378569	0.137658	0.265239	0.199335	0.948402	0.245265	0.648796	0.30791	0.30791	0.680598	0.982792	0.159106	0.208063	0.0753623	0.696683	0.948402	0.0951573	0.680598	0.896986	0.633091	0.0446093	0.208063	0.154586	0.762122	0.0951573	0.512841	0.112109	0.745609	0.829024	0.0153173	0.633091	0.391097	0.0415215	0.144586	0.0753623	0.948402	0.586824	0.527302	0.319139	0.512841	0.812183	0.330589	0.106252	0.571701	0.982792	0.0415215	0.159106
AUC_phenol	0.696683	0.896986	0.30791	0.470532	0.130948	0.664633	0.571701	0.319139	0.416775	0.541936	0.00920178	0.527302	0.182564	0.745609	0.696683	0.648796	0.208063	0.0512656	0.429919	0.795415	0.845931	0.354148	0.0283197	0.862898	0.158294	0.416775	0.795415	0.829024	0.896986	0.296904	0.151735	0.896986	0.571701	0.745609	0.571701	0.391097	0.586824	0.96559	0.778725	0.484452	0.512841	0.541936	0.470532	0.556737	0.778725	0.354148	0.879919	0.664633	0.914093
AUC_propane-1,2,3-tricarboxylate	0.0415215	0.829024	0.948402	0.035806	0.0184527	0.047856	0.275567	0.745609	0.879919	0.896986	0.829024	0.812183	0.931234	0.664633	0.330589	0.354148	0.151735	0.0800194	0.0184527	0.00450844	0.896986	0.378569	0.914093	8.36659e-05	0.130186	0.812183	0.845931	0.498556	0.931234	0.680598	0.896986	0.845931	0.124455	0.378569	0.0283197	0.0220342	0.00344645	0.255138	0.000331668	0.571701	0.000521134	0.633091	0.0899137	0.456801	0.896986	0.035806	0.470532	0.914093	0.633091
AUC_salicylaldehyde	0.366251	0.879919	0.664633	0.403833	0.190836	0.0240032	0.30791	0.982792	0.443262	0.124455	0.100603	0.556737	0.982792	0.812183	1	0.931234	0.470532	0.696683	0.680598	0.199335	0.512841	0.330589	0.896986	0.862898	0.888252	0.541936	0.208063	0.778725	0.330589	0.762122	0.34226	0.137658	0.416775	0.330589	0.617524	0.498556	0.829024	0.982792	0.378569	0.498556	0.795415	0.456801	0.391097	0.795415	0.0585895	0.484452	0.617524	0.34226	0.0385885
AUC_stearic acid	0.862898	0.948402	0.729195	0.745609	0.896986	0.275567	0.556737	0.378569	0.0848688	0.106252	0.137658	0.245265	0.296904	0.664633	0.862898	0.680598	0.286123	0.1667	0.914093	0.680598	0.403833	0.035806	0.571701	0.795415	0.86266	0.174519	0.429919	0.862898	0.130948	0.829024	0.586824	0.829024	0.527302	0.556737	0.498556	0.862898	0.96559	0.403833	0.762122	0.174519	0.286123	0.914093	0.648796	0.245265	0.498556	0.729195	0.931234	0.982792	0.21702
AUC_stigmasterol	0.931234	0.556737	0.0951573	0.182564	0.982792	0.680598	0.812183	0.914093	0.174519	0.879919	0.0899137	0.366251	0.151735	0.130948	0.330589	0.130948	0.914093	0.470532	0.190836	0.982792	0.571701	0.648796	0.879919	0.527302	0.982762	0.633091	0.696683	0.330589	0.712884	0.812183	0.1667	0.00258622	0.512841	0.982792	0.512841	0.366251	0.0331699	0.556737	0.664633	0.403833	0.106252	0.391097	0.633091	0.00136332	0.571701	0.648796	0.378569	0.0800194	0.0800194
AUC_threonic acid	0.729195	0.648796	0.762122	0.512841	0.948402	0.931234	0.319139	0.712884	0.729195	0.137658	0.586824	0.795415	0.879919	0.664633	0.208063	0.571701	0.633091	0.931234	0.586824	0.512841	0.319139	0.174519	0.34226	0.96559	0.422481	0.896986	0.762122	0.602099	0.245265	0.208063	0.829024	0.680598	0.617524	0.812183	0.470532	0.896986	0.456801	0.199335	0.484452	0.0899137	0.403833	0.745609	1	0.879919	0.151735	0.443262	0.0708943	0.255138	0.182564
AUC_trans-4-hydroxyproline	0.712884	0.0625115	0.00512408	0.617524	0.982792	0.182564	0.484452	0.30791	0.712884	0.541936	0.296904	0.795415	0.664633	0.174519	0.286123	0.130948	0.0848688	0.208063	0.829024	0.778725	0.1667	0.416775	0.21702	0.527302	0.778346	0.190836	0.586824	0.0625115	0.0306759	0.319139	0.330589	0.0753623	0.366251	0.586824	0.208063	0.556737	0.664633	0.235621	0.712884	0.96559	0.470532	0.879919	0.403833	0.429919	0.235621	0.265239	0.275567	0.0283197	0.047856
AUC_UDP-glucuronic acid	0.879919	0.829024	0.633091	0.208063	0.226206	0.762122	0.484452	0.896986	0.199335	0.96559	0.931234	0.0168315	0.0201855	0.931234	0.0899137	0.633091	0.144586	0.982792	0.159106	0.391097	0.914093	0.602099	0.30791	0.648796	0.173686	0.96559	0.470532	0.778725	0.159106	0.0666119	0.745609	0.633091	0.527302	0.795415	0.812183	0.0585895	0.275567	0.745609	0.34226	0.286123	0.429919	0.879919	0.174519	0.319139	0.047856	0.664633	0.484452	0.712884	0.680598
AUC_uric acid	0.484452	0.0666119	0.100603	0.391097	0.914093	0.265239	0.047856	0.914093	0.443262	0.680598	0.829024	1	0.208063	0.527302	0.366251	0.21702	0.255138	0.235621	0.745609	0.296904	0.144586	0.696683	0.255138	0.664633	0.455989	0.416775	0.137658	0.275567	0.982792	0.982792	0.0800194	0.556737	0.0512656	0.0385885	0.0446093	0.845931	0.914093	0.0899137	0.896986	0.696683	0.664633	0.047856	0.982792	0.982792	0.498556	0.0899137	0.541936	0.174519	0.778725
AUC_uridine	0.556737	0.498556	0.541936	0.330589	1	0.118176	0.144586	0.0153173	0.124455	0.00580115	0.443262	0.255138	0.354148	0.617524	0.226206	0.498556	0.255138	0.845931	0.416775	0.680598	0.255138	0.0168315	0.512841	0.96559	0.519302	0.680598	0.795415	0.896986	0.812183	0.354148	0.484452	0.879919	0.571701	0.403833	0.602099	0.795415	0.416775	0.0331699	0.602099	0.00344645	0.617524	0.96559	0.0800194	0.729195	0.664633	0.729195	0.199335	0.366251	0.982792
citric acid	0.118176	0.013906	0.0168315	0.403833	0.484452	0.512841	0.696683	0.633091	0.100603	0.712884	0.829024	0.354148	0.159106	0	0.914093	1.86219e-05	0.617524	0.829024	0.498556	0.648796	0.845931	0.286123	0.0848688	0.982792	0.974145	0.556737	0.443262	0.00258622	0.879919	1	0.745609	0.013906	0.879919	0.330589	0.265239	0.571701	0.151735	0.100603	0.795415	0.712884	0.443262	0.226206	0.845931	0.00450844	0.845931	0.648796	0.443262	0.000951363	0.286123
cysteine-glycine	0.391097	0.862898	0.391097	0.633091	0.664633	0.896986	0.931234	0.812183	0.34226	0.829024	0.190836	0.30791	0.296904	0.982792	0.778725	0.96559	0.541936	0.000200713	0.931234	0.391097	0.112109	0.586824	0.664633	0.696683	0.837188	0.118176	0.745609	0.391097	0.484452	0.982792	0.795415	0.527302	0.778725	0.931234	0.319139	0.712884	0.182564	0.762122	0.498556	0.208063	0.296904	0.354148	0.617524	0.729195	0.762122	0.617524	0.931234	0.602099	0.696683
cystine	0.862898	0.112109	0.208063	0.617524	0.729195	0.0512656	0.617524	0.429919	0.403833	0.106252	0.914093	0.366251	0.812183	0.0585895	0.556737	0.0951573	0.296904	0.118176	0.729195	0.571701	0.30791	0.527302	0.190836	0.484452	0.624676	0.416775	0.484452	0.00222314	0.896986	0.829024	0.633091	0.0331699	0.664633	0.366251	0.896986	0.96559	0.617524	0.456801	0.541936	0.0800194	0.862898	0.948402	0.762122	0.330589	0.862898	0.948402	0.354148	0.0415215	0.34226
dithiothreitol	0.586824	0.896986	0.648796	0.0240032	0.416775	0.137658	0.429919	0.541936	0.0666119	0.0184527	0.762122	0.124455	0.366251	0.96559	0.00222314	0.712884	0.118176	0.648796	0.0415215	0.680598	0.443262	0.0415215	0.617524	0.633091	0.177675	0.829024	0.745609	0.470532	0.208063	0.0415215	0.829024	0.484452	0.21702	0.199335	0.416775	0.1667	0.144586	0.391097	0.696683	0.00258622	0.586824	0.829024	0.470532	0.296904	0.190836	0.319139	0.000785442	0.429919	0.366251
GABA	0.795415	0.0153173	0.30791	0.696683	0.456801	0.144586	0.648796	0.366251	0.556737	0.0625115	0.914093	0.443262	0.931234	0.1667	0.812183	0.0585895	0.762122	0.416775	0.762122	0.633091	0.762122	0.319139	0.0385885	0.762122	0.720555	0.896986	0.199335	0.159106	0.484452	0.829024	0.100603	0.199335	0.366251	0.296904	0.130948	0.541936	0.914093	0.527302	0.762122	0.137658	0.712884	0.617524	0.571701	0.862898	0.378569	0.931234	0.182564	0.0899137	0.680598
gamma-tocopherol	0.354148	0.0666119	0.443262	0.286123	0.199335	0.862898	0.845931	0.948402	0.896986	0.403833	0.633091	0.982792	0.982792	0.403833	0.443262	0.130948	0.617524	0.366251	0.286123	0.330589	0.330589	0.879919	0.319139	0.0512656	0.301483	0.762122	0.235621	0.896986	0.429919	0.914093	0.416775	0.680598	0.982792	0.845931	0.00823977	0.378569	0.0899137	0.862898	0.391097	0.96559	0.443262	0.879919	0.0951573	0.948402	0.296904	0.190836	0.265239	0.330589	0.470532
Glucose	0.387623	0.98267	0.913488	0.0872864	0.327005	0.00850035	0.251553	0.630661	0.261643	0.630661	0.948038	0.304307	0.615006	0.861937	0.251553	0.509797	0.213512	0.615006	0.0368797	0.0208059	0.387623	0.134549	0.630661	0.00758833	0.412523	0.439943	0.232068	0.948038	0.584141	0.5539	0.98267	0.375065	0.00355762	0.0268907	0.251553	0.134549	0.115234	0.760484	0.0368797	0.646456	0.00949192	0.49545	0.097845	0.426556	0.5539	0.33869	0.827831	0.584141	0.793996
glutamic acid	0.118176	0.245265	0.0666119	0.931234	0.680598	0.829024	0.208063	0.512841	0.664633	0.948402	0.696683	0.556737	0.845931	0.0283197	0.729195	0.0512656	0.137658	0.443262	0.96559	0.617524	0.403833	0.34226	0.34226	0.712884	0.249283	0.21702	0.30791	0.118176	0.617524	0.378569	0.571701	0.0666119	0.556737	0.862898	0.648796	0.931234	0.245265	0.366251	0.795415	0.617524	0.330589	0.602099	0.182564	0.012593	0.664633	0.795415	0.948402	0.0512656	0.0666119
glycine	0.696683	0.617524	0.403833	0.174519	0.0899137	0.21702	0.275567	0.571701	0.96559	0.602099	0.812183	0.541936	0.456801	0.330589	0.556737	0.617524	0.265239	0.443262	0.1667	0.226206	0.762122	0.391097	0.879919	0.106252	0.301483	0.378569	0.914093	0.541936	0.862898	0.729195	0.296904	0.571701	0.255138	0.226206	0.208063	0.0848688	0.729195	0.130948	0.0708943	0.296904	0.0899137	0.416775	0.208063	0.416775	0.354148	0.696683	0.378569	0.255138	0.118176
Insulin	0.1667	0.527302	0.712884	0.862898	0.778725	0.21702	0.226206	0.729195	0.296904	0.484452	0.1667	0.512841	0.696683	0.226206	0.1667	0.34226	0.829024	0.602099	0.729195	0.21702	0.429919	0.245265	0.948402	0.896986	0.365374	0.556737	0.255138	0.144586	0.0283197	0.330589	0.931234	0.812183	0.556737	0.812183	0.795415	0.829024	0.745609	0.556737	0.617524	0.96559	0.778725	0.845931	0.527302	0.416775	0.00512408	0.778725	0.0753623	0.896986	0.199335
kynurenine	0.745609	0.112109	0.226206	0.391097	0.429919	0.00450844	0.664633	0.391097	0.429919	0.00735503	0.112109	0.512841	0.602099	0.541936	0.484452	0.527302	0.0260969	0.829024	0.286123	0.265239	0.403833	0.00114311	0.190836	0.456801	0.296007	0.296904	0.190836	0.130948	0.586824	0.456801	0.366251	0.366251	0.378569	0.416775	0.512841	0.484452	0.429919	0.633091	0.21702	0.0220342	0.617524	0.729195	0.330589	0.602099	0.795415	0.680598	0.255138	0.416775	0.862898
lactic acid	0.778725	0.896986	0.429919	0.0625115	0.047856	0.34226	0.896986	0.586824	0.0708943	0.729195	0.190836	0.0446093	0.948402	0.664633	0.1667	0.403833	0.00580115	0.0899137	0.0168315	0.729195	0.151735	0.112109	0.470532	0.112109	0.0247	0.0625115	0.914093	0.896986	0.845931	0.354148	0.648796	0.319139	0.829024	0.96559	0.512841	0.0260969	0.30791	0.586824	0.151735	0.96559	0.470532	0.812183	0.124455	0.378569	0.556737	0.712884	0.845931	0.443262	0.931234
lysine	0.812183	0.255138	0.391097	0.190836	0.182564	0.124455	0.96559	0.879919	0.948402	0.34226	0.498556	0.556737	0.586824	0.0951573	0.0102452	0.255138	0.0899137	0.484452	0.112109	0.190836	0.34226	0.527302	0.680598	0.456801	0.0268409	0.354148	0.729195	0.100603	0.0283197	0.0168315	0.30791	0.403833	0.0753623	0.0331699	0.571701	0.0848688	0.729195	0.354148	0.226206	0.319139	0.354148	0.527302	0.265239	0.21702	0.137658	0.556737	0.012593	0.541936	0.541936
malic acid	0.862898	0.812183	0.586824	0.106252	0.21702	0.416775	0.762122	0.617524	0.378569	1	0.498556	0.456801	0.275567	0.762122	0.0446093	0.633091	0.106252	0.512841	0.0800194	0.914093	0.812183	0.366251	0.296904	0.0800194	0.120547	0.245265	0.633091	0.366251	0.512841	0.34226	0.235621	0.527302	0.829024	0.712884	0.1667	0.137658	0.403833	0.896986	0.541936	0.845931	0.948402	0.245265	0.416775	0.982792	0.182564	0.633091	0.34226	0.470532	0.862898
N-methylalanine	0.255138	0.245265	0.112109	0.118176	0.296904	0.696683	0.0585895	0.112109	0.235621	0.914093	0.896986	0.429919	0.879919	0.319139	0.0548421	0.106252	0.729195	0.378569	0.174519	0.265239	0.982792	0.456801	0.199335	0.391097	0.745177	0.664633	0.208063	0.366251	0.208063	0.226206	0.112109	0.0951573	0.0666119	0.235621	0.124455	0.047856	0.275567	0.680598	0.330589	0.602099	0.151735	0.330589	0.648796	0.130948	0.34226	0.286123	0.137658	0.0512656	0.118176
oxoproline	0.648796	0.330589	0.712884	0.151735	0.354148	0.0800194	0.762122	0.795415	0.354148	0.0260969	0.286123	0.235621	0.96559	0.330589	0.013906	0.470532	0.130948	0.778725	0.137658	0.330589	0.366251	0.137658	0.571701	0.96559	0.105548	0.403833	0.512841	0.391097	0.106252	0.00823977	0.633091	0.696683	0.0625115	0.0283197	0.862898	0.182564	0.829024	0.948402	0.527302	0.0708943	0.571701	0.571701	0.403833	0.696683	0.391097	0.182564	0.000521134	0.896986	0.354148
phosphoric acid	0.862898	0.680598	0.633091	0.106252	0.235621	0.275567	0.617524	0.896986	0.330589	0.680598	0.778725	0.403833	0.34226	0.96559	0.1667	0.403833	0.0848688	0.512841	0.0548421	0.762122	0.34226	0.34226	0.498556	0.00450844	0.194202	0.0800194	0.648796	0.527302	0.845931	0.896986	0.512841	0.330589	0.696683	0.762122	0.137658	0.151735	0.182564	0.745609	0.275567	0.896986	0.512841	0.34226	0.190836	0.648796	0.484452	0.571701	0.96559	0.443262	0.812183
pyruvic acid	0.586824	0.354148	0.829024	0.0113742	0.0331699	0.762122	0.696683	0.330589	0.1667	0.931234	0.664633	0.226206	0.571701	0.265239	0.047856	0.0848688	0.106252	0.586824	0.00450844	0.778725	0.948402	0.403833	0.0331699	0.0625115	0.0181751	0.456801	0.556737	0.712884	0.245265	0.378569	0.416775	0.0666119	0.778725	0.96559	0.0184527	0.0201855	0.0899137	0.914093	0.235621	0.862898	0.265239	0.914093	0.226206	0.443262	0.319139	0.931234	0.696683	0.0625115	0.34226
salicylaldehyde	0.512841	0.354148	0.245265	0.0951573	0.354148	0.00823977	0.498556	0.199335	0.124455	0.0800194	0.484452	0.130948	0.762122	0.378569	0.255138	0.648796	0.00512408	0.648796	0.100603	0.729195	0.795415	0.0951573	0.190836	0.21702	0.264344	0.664633	0.556737	0.144586	0.354148	0.829024	0.633091	0.648796	0.556737	0.378569	0.778725	0.366251	0.429919	0.896986	0.429919	0.174519	0.795415	0.571701	0.0800194	0.812183	0.633091	0.948402	0.617524	0.416775	0.137658
serine	0.378569	0.648796	0.648796	0.245265	0.1667	0.0800194	0.512841	0.914093	0.829024	0.664633	0.914093	0.729195	0.982792	0.378569	0.130948	0.862898	0.130948	0.245265	0.112109	0.0260969	0.556737	0.443262	0.391097	0.00395045	0.177675	0.484452	0.456801	0.0899137	0.512841	0.648796	0.556737	0.745609	0.0951573	0.21702	0.391097	0.0548421	0.0951573	0.106252	0.013906	0.443262	0.0548421	0.729195	0.182564	0.914093	0.182564	0.144586	0.680598	0.680598	0.729195
threonic acid	0.330589	0.680598	0.680598	0.498556	0.633091	0.982792	0.286123	0.484452	0.664633	0.21702	0.745609	0.745609	0.845931	0.931234	0.275567	0.762122	0.914093	0.795415	0.729195	0.21702	0.226206	0.512841	0.664633	0.948402	0.922525	0.812183	0.829024	0.541936	0.633091	0.648796	0.617524	0.602099	0.586824	0.914093	0.429919	0.617524	0.527302	0.137658	0.245265	0.137658	0.34226	0.931234	0.712884	0.829024	0.403833	0.286123	0.106252	0.443262	0.456801
trans-4-hydroxyproline	0.896986	0.0306759	0.00299286	0.812183	0.712884	0.137658	0.556737	0.541936	0.862898	0.416775	0.151735	0.948402	0.762122	0.199335	0.512841	0.159106	0.0306759	0.1667	0.896986	0.914093	0.0666119	0.174519	0.275567	0.429919	0.504913	0.0585895	0.403833	0.0385885	0.0899137	0.664633	0.378569	0.112109	0.456801	0.586824	0.174519	0.931234	0.862898	0.144586	0.456801	0.795415	0.617524	0.795415	0.470532	0.680598	0.470532	0.286123	0.571701	0.0512656	0.159106
tryptophan	0.527302	0.931234	0.586824	0.0331699	0.144586	0.013906	0.712884	0.403833	0.286123	0.00190037	0.403833	0.330589	0.416775	0.778725	0.0184527	0.586824	0.112109	0.208063	0.0385885	0.0331699	0.159106	0.0102452	0.729195	0.416775	0.0703055	0.366251	0.879919	0.556737	0.144586	0.0585895	0.914093	0.948402	0.0446093	0.0625115	0.199335	0.151735	0.0708943	0.498556	0.208063	0.000521134	0.174519	0.696683	0.0848688	0.664633	0.456801	0.931234	0.035806	0.527302	0.456801
uric acid	0.680598	0.235621	0.235621	0.319139	0.541936	0.845931	0.712884	0.633091	0.429919	0.0800194	0.34226	0.948402	0.696683	0.286123	0.265239	0.265239	0.664633	0.617524	0.617524	0.931234	0.0283197	0.416775	0.0512656	0.443262	0.688104	0.21702	0.948402	0.366251	0.190836	0.124455	0.34226	0.664633	0.680598	0.541936	0.151735	0.762122	0.896986	0.0625115	0.602099	0.296904	0.795415	0.812183	0.829024	0.96559	0.931234	0.0331699	0.144586	0.137658	0.21702
uridine	0.829024	0.729195	0.829024	0.130948	0.255138	0.0625115	0.571701	0.541936	0.226206	0.000114134	0.144586	0.245265	0.416775	0.896986	0.0625115	0.914093	0.159106	0.664633	0.151735	0.174519	0.208063	0.0153173	0.778725	0.778725	0.11139	0.330589	0.829024	0.778725	0.151735	0.0113742	0.948402	0.762122	0.130948	0.118176	0.696683	0.286123	0.470532	0.443262	0.512841	0.00450844	0.541936	0.729195	0.245265	0.845931	0.648796	0.391097	0.012593	0.696683	0.354148
QUICKI	0.174519	0.586824	0.762122	0.762122	0.845931	0.286123	0.208063	0.812183	0.403833	0.527302	0.199335	0.664633	0.812183	0.255138	0.112109	0.416775	0.696683	0.648796	0.617524	0.275567	0.484452	0.366251	0.982792	0.795415	0.307014	0.664633	0.275567	0.137658	0.0240032	0.265239	0.948402	0.745609	0.633091	0.862898	0.762122	0.729195	0.633091	0.602099	0.680598	0.812183	0.812183	0.879919	0.664633	0.512841	0.00161477	0.829024	0.0585895	1	0.208063
Matsuda	0.296904	0.982792	0.879919	0.106252	0.429919	0.745609	0.199335	1	0.617524	0.896986	0.470532	0.330589	0.812183	0.778725	0.00344645	0.879919	0.159106	0.914093	0.0512656	0.778725	0.403833	0.96559	0.795415	0.470532	0.0217247	0.602099	0.137658	0.484452	0.00299286	0.0625115	0.948402	0.245265	0.762122	0.680598	0.265239	0.151735	0.208063	1	0.812183	0.498556	0.586824	0.845931	0.391097	0.96559	0.00136332	0.879919	0.0283197	0.34226	0.124455
HbA1c	0.870271	0.314636	0.0454535	0.653825	0.844581	0.836047	0.896078	0.735137	0.956614	0.583462	0.292388	0.939283	0.459577	0.827529	0.265868	0.768428	0.235954	0.021431	0.965286	0.43238	0.00113747	0.480487	0.861694	0.3497	0.852875	0.000223286	0.473469	0.501823	0.0438551	0.271057	0.645864	0.85313	0.170336	0.140632	0.303399	0.947946	0.819028	0.217177	0.637938	0.281607	0.568241	0.956614	0.965286	0.768428	0.487553	0.276303	0.15503	0.501823	0.405991
FSHmIU.mL	0.434902	0.104843	0.0323835	0.102008	0.21077	0.769625	0.340482	0.462027	0.119805	0.744742	0.811533	0.132737	0.122957	0.273772	0.21077	0.122957	0.671506	0.132737	0.364494	0.295108	0.132737	0.956843	0.72008	0.888057	0.969731	0.143009	0.948221	0.273772	0.364494	0.229118	0.172851	0.49701	0.253351	0.434902	0.102008	0.10773	0.41508	0.358409	0.600805	0.370632	0.323048	0.593128	0.879499	0.184975	0.913792	0.243485	0.736495	0.323048	0.570327
LHmIU.mL	0.633091	0.319139	0.182564	0.0201855	0.130948	0.664633	0.795415	0.602099	0.0625115	0.512841	0.617524	0.112109	0.0753623	0.296904	0.190836	0.144586	0.633091	0.255138	0.118176	0.680598	0.378569	0.778725	0.862898	0.617524	0.672054	0.470532	0.795415	0.696683	0.712884	0.470532	0.729195	0.354148	0.680598	0.931234	0.0951573	0.0666119	0.106252	0.571701	0.443262	0.265239	0.286123	0.96559	0.778725	0.0512656	0.982792	0.602099	0.862898	0.470532	0.429919
cholmg.dL	0.64928	0.353875	0.324727	0.92584	0.87316	0.500534	0.698582	0.317648	0.759141	0.698582	0.629895	0.688631	0.810566	0.915276	0.573023	0.84176	0.789904	0.210403	0.800221	0.0298838	0.168644	0.759141	0.440624	0.718612	0.878135	0.0572538	0.789904	0.60121	0.448968	0.84176	0.440624	0.852206	0.040124	0.0729686	0.448968	0.728687	0.748953	0.789904	0.610718	0.738802	0.339136	0.64928	0.0818124	0.368939	0.852206	0.688631	0.87316	0.820939	0.831337
HDLmg.dL	0.957685	0.0604199	0.179665	0.831716	0.749509	0.915468	0.873447	0.340298	0.769875	0.501536	0.894427	0.284693	0.298089	0.831716	0.284693	0.417141	0.852539	0.537221	0.894427	0.179665	0.0555756	0.749509	0.749509	0.978837	0.738802	0.0955652	0.355028	0.573913	0.160145	0.222868	0.133434	0.915468	0.340298	0.417141	0.325895	0.709215	0.831716	0.385457	0.852539	0.450037	0.915468	0.519248	0.0604199	0.519248	0.125204	0.915468	0.894427	0.417141	0.501536
LDLmg.dL	0.957685	0.81099	0.537221	0.852539	0.852539	0.936558	0.894427	0.555445	0.790373	0.611542	0.258926	0.573913	0.669579	1	0.831716	0.957685	0.978837	0.401145	0.592615	0.258926	0.433441	0.298089	0.433441	0.873447	0.64928	0.0555756	0.298089	0.501536	0.519248	0.831716	0.915468	0.709215	0.189944	0.271638	0.611542	0.669579	0.729285	0.852539	0.573913	0.650034	0.160145	0.749509	0.222868	0.555445	0.873447	0.433441	0.729285	0.957685	0.915468
triglymg.dL	0.573913	0.519248	0.450037	0.978837	0.852539	0.0510032	0.630685	0.102492	0.831716	0.537221	0.894427	0.978837	0.831716	0.669579	0.650034	0.978837	0.81099	0.102492	0.894427	0.018565	0.20057	0.340298	0.189944	0.650034	0.60121	0.258926	0.355028	0.790373	0.894427	0.957685	0.669579	0.325895	0.0426456	0.0510032	0.729285	0.894427	0.689309	0.537221	0.689309	0.0955652	0.749509	0.433441	0.150901	0.537221	0.790373	0.915468	0.852539	0.936558	0.417141
heightcm.	0.556737	0.047856	0.208063	0.100603	0.484452	0.21702	0.190836	0.648796	0.0899137	0.845931	0.812183	0.208063	0.498556	0.21702	0.403833	0.0446093	0.829024	0.879919	0.130948	0.226206	0.879919	0.617524	0.456801	0.0708943	0.879709	0.931234	0.729195	0.137658	0.527302	0.34226	0.429919	0.0848688	0.0848688	0.144586	0.0168315	0.378569	0.286123	0.255138	0.484452	0.729195	0.174519	0.190836	0.100603	0.470532	0.391097	0.896986	0.484452	0.0800194	0.795415
weightkg.	0.484452	0.664633	0.586824	0.159106	0.896986	0.0899137	0.712884	0.366251	0.0283197	0.330589	0.795415	0.118176	0.602099	1	0.0666119	0.541936	0.484452	0.664633	0.182564	0.729195	0.778725	0.106252	0.729195	0.391097	0.90537	0.484452	0.144586	0.762122	0.778725	0.762122	0.762122	0.174519	0.0512656	0.0385885	0.498556	0.556737	0.617524	0.208063	0.96559	0.30791	0.729195	0.0625115	0.470532	0.416775	0.914093	0.245265	0.0708943	0.226206	0.512841
BMI	0.265239	0.795415	0.712884	0.914093	0.265239	0.729195	0.845931	0.648796	0.159106	0.296904	0.762122	0.443262	0.982792	0.896986	0.429919	0.948402	0.845931	0.429919	0.96559	0.391097	0.556737	0.235621	0.602099	0.429919	0.455989	0.391097	0.144586	0.778725	0.778725	0.556737	0.762122	0.366251	0.541936	0.456801	0.391097	0.712884	0.664633	0.235621	0.286123	0.286123	0.443262	0.296904	0.34226	0.330589	0.829024	0.0666119	0.0201855	0.484452	0.235621
DXA..Body Fat	0.144586	0.586824	0.729195	0.416775	0.696683	0.456801	0.498556	0.21702	0.00344645	0.34226	0.527302	0.0168315	0.602099	0.829024	0.275567	0.541936	0.378569	0.0753623	0.527302	0.416775	0.648796	0.159106	0.571701	0.795415	0.931114	0.378569	0.556737	0.633091	0.541936	0.541936	0.96559	0.275567	0.778725	0.602099	0.862898	0.96559	0.862898	0.0899137	0.319139	0.354148	0.296904	0.151735	0.470532	0.330589	0.829024	0.1667	0.275567	0.319139	0.762122
VO2peak(ml.FFM.min)	0.527302	0.174519	0.047856	0.159106	0.571701	0.1667	0.982792	0.366251	0.0951573	0.0625115	0.571701	0.159106	0.286123	0.182564	0.0585895	0.106252	0.745609	0.443262	0.190836	0.0512656	0.296904	0.0240032	0.96559	0.845931	0.483666	0.556737	0.829024	0.319139	0.174519	0.118176	0.862898	0.286123	0.0201855	0.0666119	0.265239	0.391097	0.182564	0.0666119	0.648796	0.0102452	0.296904	0.96559	0.190836	0.265239	0.391097	0.680598	0.0666119	0.035806	0.1667
[truncated: 67 more columns]
